# Supplementary material for: CSB ablation induced apoptosis is mediated by increased endoplasmic reticulum stress response
Source: PLoS One. 2017 Mar 2;12(3):e0172399. doi: 10.1371/journal.pone.0172399 (PMC5333825; doi:10.1371/journal.pone.0172399)
Supplement: S1 Table — The 6 lists correspond to the same 6 comparisons shown in the Venn diagrams of Fig 2. Transcripts were selected, on filtered dataset (see Methods) by a combination of fold change and moderated T-test thresholds by the R-Bioconductor tool Limma (p-value<0.05; |Log2 fold-change ratio| >0.56 equivalent to 1.5 fold in linear scale). (XLSX) [file pone.0172399.s001.xlsx]

## Sheet: Foglio1
				<4fc	6							<4fc	6							<4fc	6							<4fc	24							<4fc	26							<4fc	31
				<2fc	87							<2fc	83							<2fc	74							<2fc	220							<2fc	213							<2fc	218
				<1.5fc	412							<1.5fc	327							<1.5fc	380							<1.5fc	624							<1.5fc	597							<1.5fc	609
				>1.5fc	554							>1.5fc	480							>1.5fc	590							>1.5fc	304							>1.5fc	221	<2fc						>1.5fc	576
				>2fc	112							>2fc	76							>2fc	131							>2fc	30							>2fc	24	>2fc						>2fc	140
				>4fc	8							>4fc	5							>4fc	5							>4fc	2							>4fc	1							>4fc	15
					ANTISENSO_6h - CTRL_6h								ANTISENSO_6h - OLIGO_6h								ANTISENSO_6h - SENSO_6h								ANTISENSO_12h - CTRL_12h								ANTISENSO_12h - OLIGO_12h								ANTISENSO_12h - SENSO_12h
		Name	Symbol	ID	logFC	P.Value				Name	Symbol	ID	logFC	P.Value				Name	Symbol	ID	logFC	P.Value				Name	Symbol	ID	logFC	P.Value				Name	Symbol	ID	logFC	P.Value				Name	Symbol	ID	logFC	P.Value
		structural maintenance of chromosomes 1A	SMC1A	A_33_P3290909	-2.51984	5.08732e-09				structural maintenance of chromosomes 1A	SMC1A	A_33_P3290909	-2.68025	2.29969e-09				structural maintenance of chromosomes 1A	SMC1A	A_33_P3290909	-3.46491	7.94226e-11				complement component 1, q subcomponent binding protein	C1QBP	A_23_P370434	-3.72372	5.87704e-12				complement component 1, q subcomponent binding protein	C1QBP	A_23_P370434	-3.68955	6.65226e-12						A_33_P3402217	-3.71664	2.12962e-10
		ATP-binding cassette, sub-family B (MDR/TAP), member 7	ABCB7	A_23_P171258	-2.38617	3.49525e-09				ATP-binding cassette, sub-family B (MDR/TAP), member 7	ABCB7	A_23_P171258	-2.42968	2.76943e-09				integrin, beta 1 (fibronectin receptor, beta polypeptide, antigen CD29 includes MDF2, MSK12)	ITGB1	A_23_P104199	-2.84848	3.18369e-10						A_33_P3402217	-3.44311	5.81246e-10						A_33_P3402217	-3.39663	6.94271e-10				complement component 1, q subcomponent binding protein	C1QBP	A_23_P370434	-3.43442	1.7389e-11
		isocitrate dehydrogenase 3 (NAD+) beta	IDH3B	A_33_P3261084	-2.31921	3.5438e-08				complement component 1, q subcomponent binding protein	C1QBP	A_23_P370434	-2.3966	1.99583e-09						A_33_P3402217	-2.54288	2.83585e-08				RNA binding motif protein 25	RBM25	A_23_P99762	-3.18449	2.98919e-13				RNA binding motif protein 25	RBM25	A_23_P99762	-3.1972	2.83184e-13				integrin, beta 1 (fibronectin receptor, beta polypeptide, antigen CD29 includes MDF2, MSK12)	ITGB1	A_23_P104199	-3.32034	4.1862e-11
		RNA binding motif protein 25	RBM25	A_23_P99762	-2.2941	2.48515e-11						A_33_P3402217	-2.23626	1.38828e-07				ATP-binding cassette, sub-family B (MDR/TAP), member 7	ABCB7	A_23_P171258	-2.33374	4.64921e-09				ATP-binding cassette, sub-family B (MDR/TAP), member 7	ABCB7	A_23_P171258	-3.02891	1.55495e-10				ATP-binding cassette, sub-family B (MDR/TAP), member 7	ABCB7	A_23_P171258	-3.14224	9.56322e-11				RNA binding motif protein 25	RBM25	A_23_P99762	-3.14117	3.60009e-13
		complement component 1, q subcomponent binding protein	C1QBP	A_23_P370434	-2.28906	3.60828e-09				isocitrate dehydrogenase 3 (NAD+) beta	IDH3B	A_33_P3261084	-2.10237	1.19172e-07				RNA binding motif protein 25	RBM25	A_23_P99762	-2.21087	4.06846e-11				chromosome 12 open reading frame 57	C12orf57	A_23_P350551	-3.02492	8.5953e-10				chromosome 12 open reading frame 57	C12orf57	A_23_P350551	-3.09776	6.29974e-10				t-complex 1	TCP1	A_32_P456537	-3.04016	1.82984e-10
		t-complex 1	TCP1	A_32_P456537	-2.11318	2.01276e-08				RNA binding motif protein 25	RBM25	A_23_P99762	-2.09074	8.54996e-11				complement component 1, q subcomponent binding protein	C1QBP	A_23_P370434	-2.10292	1.06654e-08				t-complex 1	TCP1	A_32_P456537	-2.95694	2.63811e-10				adenosine deaminase	ADA	A_23_P210482	-2.84842	4.89551e-12				chromosome 12 open reading frame 57	C12orf57	A_23_P350551	-2.9693	1.09457e-09
		hyaluronoglucosaminidase 1	HYAL1	A_23_P69329	-1.97145	1.39648e-09				t-complex 1	TCP1	A_32_P456537	-1.86659	9.41795e-08				t-complex 1	TCP1	A_32_P456537	-1.9926	4.19958e-08				adenosine deaminase	ADA	A_23_P210482	-2.82869	5.37536e-12				structural maintenance of chromosomes 1A	SMC1A	A_33_P3290909	-2.80691	1.26424e-09				structural maintenance of chromosomes 1A	SMC1A	A_33_P3290909	-2.9329	7.13496e-10
				A_33_P3402217	-1.95281	7.04105e-07				ERGIC and golgi 2	ERGIC2	A_23_P139509	-1.86119	2.36703e-10				isocitrate dehydrogenase 3 (NAD+) beta	IDH3B	A_33_P3261084	-1.99256	2.28639e-07				proteasome (prosome, macropain) 26S subunit, ATPase, 6	PSMC6	A_23_P128930	-2.75736	2.10254e-10				angiomotin like 2	AMOTL2	A_23_P166686	-2.73027	1.01154e-09				angiomotin like 2	AMOTL2	A_23_P166686	-2.88607	4.89987e-10
		sperm associated antigen 7	SPAG7	A_23_P218412	-1.9429	8.86173e-09				sperm associated antigen 7	SPAG7	A_23_P218412	-1.86036	1.53668e-08				hyaluronoglucosaminidase 1	HYAL1	A_23_P69329	-1.8282	3.70093e-09				angiomotin like 2	AMOTL2	A_23_P166686	-2.74262	9.5377e-10				ubiquitin carboxyl-terminal esterase L3 (ubiquitin thiolesterase)	UCHL3	A_23_P76690	-2.71099	2.40445e-08				ATP-binding cassette, sub-family B (MDR/TAP), member 7	ABCB7	A_23_P171258	-2.76708	5.10833e-10
		ERGIC and golgi 2	ERGIC2	A_23_P139509	-1.79204	3.89408e-10				ubiquitin carboxyl-terminal esterase L3 (ubiquitin thiolesterase)	UCHL3	A_23_P76690	-1.85461	2.3038e-06				proteasome (prosome, macropain) 26S subunit, ATPase, 6	PSMC6	A_23_P128930	-1.82428	4.2598e-08				isocitrate dehydrogenase 3 (NAD+) beta	IDH3B	A_33_P3261084	-2.66269	6.18826e-09				DBF4 homolog (S. cerevisiae)	DBF4	A_33_P3413523	-2.70654	1.1459e-10				proteasome (prosome, macropain) 26S subunit, ATPase, 6	PSMC6	A_23_P128930	-2.76232	2.05325e-10
		proteasome (prosome, macropain) 26S subunit, ATPase, 6	PSMC6	A_23_P128930	-1.75481	6.89298e-08				proteasome (prosome, macropain) 26S subunit, ATPase, 6	PSMC6	A_23_P128930	-1.828	4.15318e-08				ERGIC and golgi 2	ERGIC2	A_23_P139509	-1.76269	4.83568e-10				ubiquitin carboxyl-terminal esterase L3 (ubiquitin thiolesterase)	UCHL3	A_23_P76690	-2.65064	3.18779e-08				isocitrate dehydrogenase 3 (NAD+) beta	IDH3B	A_33_P3261084	-2.67918	5.71854e-09				adenosine deaminase	ADA	A_23_P210482	-2.60241	1.64529e-11
		WD repeat domain 78	WDR78	A_33_P3379381	-1.71174	2.59108e-08				hyaluronoglucosaminidase 1	HYAL1	A_23_P69329	-1.81435	4.08091e-09				sperm associated antigen 7	SPAG7	A_23_P218412	-1.69686	4.86495e-08				DBF4 homolog (S. cerevisiae)	DBF4	A_33_P3413523	-2.58111	2.14489e-10				proteasome (prosome, macropain) 26S subunit, ATPase, 6	PSMC6	A_23_P128930	-2.65718	3.42201e-10				isocitrate dehydrogenase 3 (NAD+) beta	IDH3B	A_33_P3261084	-2.58604	8.98102e-09
		suppression of tumorigenicity 13 (colon carcinoma) (Hsp70 interacting protein)	ST13	A_24_P127021	-1.68612	5.51903e-09				chromosome 12 open reading frame 57	C12orf57	A_23_P350551	-1.67178	1.35002e-06				WD repeat domain 78	WDR78	A_33_P3379381	-1.68091	3.25301e-08				hyaluronoglucosaminidase 1	HYAL1	A_23_P69329	-2.55273	4.65922e-11				hyaluronoglucosaminidase 1	HYAL1	A_23_P69329	-2.65538	2.7547e-11				DBF4 homolog (S. cerevisiae)	DBF4	A_33_P3413523	-2.51406	3.0333e-10
		pituitary tumor-transforming 1 interacting protein	PTTG1IP	A_24_P391260	-1.62124	5.05742e-07				suppression of tumorigenicity 13 (colon carcinoma) (Hsp70 interacting protein)	ST13	A_24_P127021	-1.65907	6.78633e-09				suppression of tumorigenicity 13 (colon carcinoma) (Hsp70 interacting protein)	ST13	A_24_P127021	-1.65503	7.00059e-09				structural maintenance of chromosomes 1A	SMC1A	A_33_P3290909	-2.47104	6.53293e-09				t-complex 1	TCP1	A_32_P456537	-2.59122	1.48207e-09				cerebral cavernous malformation 2	CCM2	A_33_P3209476	-2.4738	1.55562e-10
		solute carrier family 37 (glycerol-3-phosphate transporter), member 1	SLC37A1	A_23_P17695	-1.62112	2.31819e-07				pituitary tumor-transforming 1 interacting protein	PTTG1IP	A_24_P391260	-1.62155	5.04566e-07				zinc finger and SCAN domain containing 29	ZSCAN29	A_24_P942730	-1.63079	6.49021e-08				sperm associated antigen 7	SPAG7	A_23_P218412	-2.45863	4.21848e-10				sperm associated antigen 7	SPAG7	A_23_P218412	-2.46788	4.01552e-10				hyaluronoglucosaminidase 1	HYAL1	A_23_P69329	-2.45643	7.76743e-11
		zinc finger and SCAN domain containing 29	ZSCAN29	A_24_P942730	-1.56323	1.09218e-07				WD repeat domain 78	WDR78	A_33_P3379381	-1.53768	9.80183e-08				chromosome 12 open reading frame 57	C12orf57	A_23_P350551	-1.59024	2.3946e-06				cerebral cavernous malformation 2	CCM2	A_33_P3209476	-2.3794	2.59869e-10				retinoid X receptor, alpha	RXRA	A_23_P423197	-2.43521	7.79515e-11				ubiquitin carboxyl-terminal esterase L3 (ubiquitin thiolesterase)	UCHL3	A_23_P76690	-2.39804	1.10082e-07
		suppression of tumorigenicity 13 (colon carcinoma) (Hsp70 interacting protein)	ST13	A_23_P68949	-1.53908	5.83521e-08				suppression of tumorigenicity 13 (colon carcinoma) (Hsp70 interacting protein)	ST13	A_23_P68949	-1.51917	6.85429e-08				suppression of tumorigenicity 13 (colon carcinoma) (Hsp70 interacting protein)	ST13	A_32_P156892	-1.54936	1.60758e-07				ERGIC and golgi 2	ERGIC2	A_23_P139509	-2.32588	1.2224e-11				cerebral cavernous malformation 2	CCM2	A_33_P3209476	-2.35785	2.92916e-10				retinoid X receptor, alpha	RXRA	A_23_P423197	-2.30599	1.60454e-10
		amyloid beta (A4) precursor protein	APP	A_33_P3296479	-1.49192	3.40462e-06				amyloid beta (A4) precursor protein	APP	A_33_P3296479	-1.49429	3.3446e-06				suppression of tumorigenicity 13 (colon carcinoma) (Hsp70 interacting protein)	ST13	A_23_P68949	-1.54084	5.75311e-08				replication protein A1, 70kDa	RPA1	A_23_P107073	-2.26389	8.84542e-09				suppression of tumorigenicity 13 (colon carcinoma) (Hsp70 interacting protein)	ST13	A_24_P127021	-2.32172	8.48401e-11				calmodulin 3 (phosphorylase kinase, delta)	CALM3	A_24_P219785	-2.19191	9.84578e-09
		adenosine deaminase	ADA	A_23_P210482	-1.48207	2.52696e-08				suppression of tumorigenicity 13 (colon carcinoma) (Hsp70 interacting protein)	ST13	A_32_P156892	-1.46268	3.22019e-07						A_24_P306469	-1.52006	4.90742e-06				suppression of tumorigenicity 13 (colon carcinoma) (Hsp70 interacting protein)	ST13	A_24_P127021	-2.23621	1.3945e-10				ERGIC and golgi 2	ERGIC2	A_23_P139509	-2.23773	2.05039e-11				myeloid leukemia factor 2	MLF2	A_23_P13873	-2.18919	4.96552e-11
		suppression of tumorigenicity 13 (colon carcinoma) (Hsp70 interacting protein)	ST13	A_32_P156892	-1.46759	3.09347e-07				proteasome (prosome, macropain) subunit, alpha type, 4	PSMA4	A_24_P124992	-1.41322	1.69236e-07				pituitary tumor-transforming 1 interacting protein	PTTG1IP	A_24_P391260	-1.50339	1.22495e-06				retinoid X receptor, alpha	RXRA	A_23_P423197	-2.18029	3.35791e-10				interleukin 18 receptor 1	IL18R1	A_24_P208567	-2.15823	8.33413e-10				replication protein A1, 70kDa	RPA1	A_23_P107073	-2.18653	1.375e-08
		leucine rich repeat containing 49	LRRC49	A_33_P3344399	-1.44978	2.61717e-09						A_24_P306469	-1.40255	1.18108e-05				serrate RNA effector molecule homolog (Arabidopsis)	SRRT	A_33_P3299590	-1.48527	1.30138e-05				zinc finger and SCAN domain containing 29	ZSCAN29	A_24_P942730	-2.09844	2.67553e-09				zinc finger and SCAN domain containing 29	ZSCAN29	A_24_P942730	-2.13816	2.10003e-09				ERGIC and golgi 2	ERGIC2	A_23_P139509	-2.17561	2.98631e-11
				A_24_P306469	-1.44148	8.78856e-06				RAB13, member RAS oncogene family	RAB13	A_23_P46369	-1.38362	5.3734e-08				amyloid beta (A4) precursor protein	APP	A_33_P3296479	-1.45016	4.67572e-06				interleukin 18 receptor 1	IL18R1	A_24_P208567	-2.06542	1.47639e-09				replication protein A1, 70kDa	RPA1	A_23_P107073	-2.10935	2.1635e-08				casein kinase 2, alpha prime polypeptide	CSNK2A2	A_23_P14915	-2.1617	1.62939e-10
		proteasome (prosome, macropain) subunit, alpha type, 4	PSMA4	A_24_P124992	-1.42345	1.55037e-07				DBF4 homolog (S. cerevisiae)	DBF4	A_33_P3413523	-1.36607	6.5049e-07				CWC22 spliceosome-associated protein homolog (S. cerevisiae)	CWC22	A_23_P373799	-1.439	3.34505e-07				transmembrane protein 184B	TMEM184B	A_23_P17870	-2.04875	2.10088e-09				small nucleolar RNA, C/D box 34	SNORD34	A_21_P0000219	-2.07783	1.69717e-10				sperm associated antigen 7	SPAG7	A_23_P218412	-2.1431	2.52099e-09
		ubiquitin carboxyl-terminal esterase L3 (ubiquitin thiolesterase)	UCHL3	A_23_P76690	-1.39969	4.74319e-05				calmodulin 3 (phosphorylase kinase, delta)	CALM3	A_24_P219785	-1.36046	3.11447e-06				calmodulin 3 (phosphorylase kinase, delta)	CALM3	A_24_P219785	-1.4382	1.65489e-06				small nucleolar RNA, C/D box 34	SNORD34	A_21_P0000219	-2.01699	2.51149e-10				myeloid leukemia factor 2	MLF2	A_23_P13873	-2.06217	1.09791e-10				suppression of tumorigenicity 13 (colon carcinoma) (Hsp70 interacting protein)	ST13	A_24_P127021	-2.11128	2.97621e-10
		proteasome (prosome, macropain) 26S subunit, non-ATPase, 6	PSMD6	A_23_P109928	-1.39155	3.67859e-08				leucine rich repeat containing 49	LRRC49	A_33_P3344399	-1.35761	6.08463e-09				DnaJ (Hsp40) homolog, subfamily C, member 5	DNAJC5	A_33_P3419733	-1.3887	2.15186e-05				myeloid leukemia factor 2	MLF2	A_23_P13873	-1.96952	2.01559e-10				suppression of tumorigenicity 13 (colon carcinoma) (Hsp70 interacting protein)	ST13	A_23_P68949	-2.05452	1.48848e-09				small nucleolar RNA, C/D box 34	SNORD34	A_21_P0000219	-2.09477	1.52461e-10
		RAB13, member RAS oncogene family	RAB13	A_23_P46369	-1.38207	5.44863e-08				tetratricopeptide repeat domain 12	TTC12	A_23_P24535	-1.34833	4.42546e-09				calmodulin-like 3	CALML3	A_23_P393080	-1.37504	1.08315e-09				casein kinase 2, alpha prime polypeptide	CSNK2A2	A_23_P14915	-1.96138	5.85138e-10				transmembrane protein 184B	TMEM184B	A_23_P17870	-2.0356	2.28327e-09				transmembrane protein 184B	TMEM184B	A_23_P17870	-2.09272	1.5958e-09
				A_33_P3267865	-1.36208	2.0293e-07				proteasome (prosome, macropain) 26S subunit, non-ATPase, 6	PSMD6	A_23_P109928	-1.34189	5.7788e-08				DBF4 homolog (S. cerevisiae)	DBF4	A_33_P3413523	-1.37405	6.07353e-07				adiponectin receptor 1	ADIPOR1	A_23_P46627	-1.95345	2.17387e-10				casein kinase 2, alpha prime polypeptide	CSNK2A2	A_23_P14915	-1.97608	5.30654e-10				transaldolase 1	TALDO1	A_32_P18258	-2.08632	4.08728e-08
		chromosome 12 open reading frame 57	C12orf57	A_23_P350551	-1.35185	1.43251e-05				adenosine deaminase	ADA	A_23_P210482	-1.33838	8.96682e-08				chromosome 12 open reading frame 75	C12orf75	A_32_P163089	-1.361	3.90597e-07				eukaryotic translation termination factor 1	ETF1	A_21_P0013769	-1.89989	5.44805e-09				catenin (cadherin-associated protein), alpha 1, 102kDa	CTNNA1	A_33_P3403418	-1.9574	1.37749e-09				zinc finger and SCAN domain containing 29	ZSCAN29	A_24_P942730	-2.08309	2.94115e-09
		calmodulin 3 (phosphorylase kinase, delta)	CALM3	A_24_P219785	-1.3494	3.41408e-06				calmodulin-like 3	CALML3	A_23_P393080	-1.33256	1.6283e-09				tetratricopeptide repeat domain 12	TTC12	A_23_P24535	-1.34904	4.39553e-09					XLOC_005918	A_21_P0005182	-1.86813	2.18787e-08				amyloid beta (A4) precursor protein	APP	A_33_P3296479	-1.94959	1.47503e-07				G protein pathway suppressor 1	GPS1	A_23_P158662	-2.07662	3.65987e-09
		RAB, member of RAS oncogene family-like 2A	RABL2A	A_24_P911094	-1.34738	1.28626e-08				solute carrier family 37 (glycerol-3-phosphate transporter), member 1	SLC37A1	A_23_P17695	-1.31426	2.705e-06				ubiquitin carboxyl-terminal esterase L3 (ubiquitin thiolesterase)	UCHL3	A_23_P76690	-1.33267	7.71779e-05				calmodulin 3 (phosphorylase kinase, delta)	CALM3	A_24_P219785	-1.86207	7.59083e-08				eukaryotic translation termination factor 1	ETF1	A_21_P0013769	-1.93454	4.32161e-09				adiponectin receptor 1	ADIPOR1	A_23_P46627	-2.02652	1.33862e-10
		DBF4 homolog (S. cerevisiae)	DBF4	A_33_P3413523	-1.33994	8.16186e-07				CWC22 spliceosome-associated protein homolog (S. cerevisiae)	CWC22	A_23_P373799	-1.29296	1.181e-06				solute carrier family 37 (glycerol-3-phosphate transporter), member 1	SLC37A1	A_23_P17695	-1.32663	2.43244e-06				suppression of tumorigenicity 13 (colon carcinoma) (Hsp70 interacting protein)	ST13	A_23_P68949	-1.86201	5.29141e-09				adiponectin receptor 1	ADIPOR1	A_23_P46627	-1.89767	3.18304e-10				SPRY domain containing 3	SPRYD3	A_23_P65129	-2.02219	1.16289e-08
		tetratricopeptide repeat domain 12	TTC12	A_23_P24535	-1.31946	5.83883e-09				zinc finger and SCAN domain containing 29	ZSCAN29	A_24_P942730	-1.28611	1.1232e-06				leucine rich repeat containing 49	LRRC49	A_33_P3344399	-1.30383	1.01834e-08				transaldolase 1	TALDO1	A_32_P18258	-1.8564	1.71848e-07				serrate RNA effector molecule homolog (Arabidopsis)	SRRT	A_33_P3299590	-1.89632	8.38973e-07				deoxyguanosine kinase	DGUOK	A_24_P285623	-1.94557	4.90982e-09
		serrate RNA effector molecule homolog (Arabidopsis)	SRRT	A_33_P3299590	-1.3123	4.70502e-05				RAB, member of RAS oncogene family-like 2A	RABL2A	A_24_P911094	-1.27704	2.52827e-08				cerebral cavernous malformation 2	CCM2	A_33_P3209476	-1.26523	7.30683e-07				catenin (cadherin-associated protein), alpha 1, 102kDa	CTNNA1	A_33_P3403418	-1.84074	3.04976e-09				G protein pathway suppressor 1	GPS1	A_23_P158662	-1.89615	1.16864e-08				suppression of tumorigenicity 13 (colon carcinoma) (Hsp70 interacting protein)	ST13	A_23_P68949	-1.8366	6.30791e-09
		sirtuin 5	SIRT5	A_33_P3271755	-1.30065	6.39869e-06				trafficking protein particle complex 3	TRAPPC3	A_23_P200535	-1.24221	1.33393e-06				adenosine deaminase	ADA	A_23_P210482	-1.26282	1.8226e-07				chromosome 14 open reading frame 126	C14orf126	A_23_P37144	-1.83066	1.4201e-09				calmodulin 3 (phosphorylase kinase, delta)	CALM3	A_24_P219785	-1.88953	6.33608e-08				nth endonuclease III-like 1 (E. coli)	NTHL1	A_23_P88904	-1.83299	4.40942e-09
		EF-hand domain family, member D1	EFHD1	A_33_P3418716	-1.29816	1.13206e-06				tetratricopeptide repeat domain 8	TTC8	A_32_P169735	-1.23763	2.17751e-06				catenin (cadherin-associated protein), alpha 1, 102kDa	CTNNA1	A_33_P3403418	-1.25441	3.62739e-07				G protein pathway suppressor 1	GPS1	A_23_P158662	-1.80833	2.12694e-08				deoxyguanosine kinase	DGUOK	A_24_P285623	-1.81183	1.21694e-08				eukaryotic translation termination factor 1	ETF1	A_21_P0013769	-1.82675	8.99083e-09
		CWC22 spliceosome-associated protein homolog (S. cerevisiae)	CWC22	A_23_P373799	-1.27387	1.40277e-06						A_33_P3366224	-1.21626	1.32677e-06				proteasome (prosome, macropain) 26S subunit, non-ATPase, 6	PSMD6	A_23_P109928	-1.2427	1.48371e-07				RAB13, member RAS oncogene family	RAB13	A_23_P46369	-1.80029	1.90299e-09				suppression of tumorigenicity 13 (colon carcinoma) (Hsp70 interacting protein)	ST13	A_32_P156892	-1.8099	2.35311e-08				stress-induced-phosphoprotein 1	STIP1	A_24_P327815	-1.81686	6.34572e-08
		catenin (cadherin-associated protein), alpha 1, 102kDa	CTNNA1	A_33_P3403418	-1.2281	4.66908e-07				serrate RNA effector molecule homolog (Arabidopsis)	SRRT	A_33_P3299590	-1.21131	0.000103462				small nucleolar RNA, C/D box 34	SNORD34	A_21_P0000219	-1.2307	1.36355e-07				amyloid beta (A4) precursor protein	APP	A_33_P3296479	-1.77512	4.5571e-07					XLOC_005918	A_21_P0005182	-1.79523	3.60191e-08				amyloid beta (A4) precursor protein	APP	A_33_P3296479	-1.77619	4.5244e-07
		calmodulin-like 3	CALML3	A_23_P393080	-1.22168	4.98911e-09				chromosome 3 open reading frame 78	C3orf78	A_23_P370924	-1.20592	1.76391e-05				chloride channel 2	CLCN2	A_21_P0000083	-1.21147	5.2787e-06				spastic ataxia of Charlevoix-Saguenay (sacsin)	SACS	A_33_P3405500	-1.7724	1.10705e-10				spastic ataxia of Charlevoix-Saguenay (sacsin)	SACS	A_33_P3405500	-1.77236	1.10739e-10				RAN binding protein 1 pseudogene	LOC727803	A_21_P0014871	-1.77506	6.46511e-05
		trafficking protein particle complex 3	TRAPPC3	A_23_P200535	-1.21404	1.73728e-06				catenin (cadherin-associated protein), alpha 1, 102kDa	CTNNA1	A_33_P3403418	-1.20535	5.82674e-07				angiomotin like 2	AMOTL2	A_23_P166686	-1.20937	1.79678e-05				nth endonuclease III-like 1 (E. coli)	NTHL1	A_23_P88904	-1.75674	7.59275e-09				chromosome 14 open reading frame 126	C14orf126	A_23_P37144	-1.76947	2.20575e-09				spastic ataxia of Charlevoix-Saguenay (sacsin)	SACS	A_33_P3405500	-1.77164	1.11341e-10
		small nucleolar RNA, C/D box 34	SNORD34	A_21_P0000219	-1.2116	1.64938e-07				SUB1 homolog (S. cerevisiae)	SUB1	A_24_P320328	-1.19816	0.000151118						A_33_P3254510	-1.19249	4.83089e-07				stress-induced-phosphoprotein 1	STIP1	A_24_P327815	-1.75544	9.69284e-08				RAB13, member RAS oncogene family	RAB13	A_23_P46369	-1.76834	2.39868e-09				catenin (cadherin-associated protein), alpha 1, 102kDa	CTNNA1	A_33_P3403418	-1.76161	5.36168e-09
		RAN binding protein 1	RANBP1	A_23_P91590	-1.20649	4.63664e-05				replication protein A1, 70kDa	RPA1	A_23_P107073	-1.19463	1.67411e-05						A_32_P54475	-1.18002	6.39177e-06				deoxyguanosine kinase	DGUOK	A_24_P285623	-1.75427	1.83e-08				SPRY domain containing 3	SPRYD3	A_23_P65129	-1.76731	6.28806e-08						A_33_P3254510	-1.74288	4.3751e-09
		uncharacterized LOC440292	LOC440292	A_24_P367329	-1.20587	1.14633e-06						A_24_P213228	-1.1823	1.84053e-06				RAB13, member RAS oncogene family	RAB13	A_23_P46369	-1.1726	4.02392e-07				SPRY domain containing 3	SPRYD3	A_23_P65129	-1.73108	8.11921e-08				heterogeneous nuclear ribonucleoprotein C (C1/C2)	HNRNPC	A_32_P142028	-1.74283	5.77116e-07				son of sevenless homolog 2 (Drosophila)	SOS2	A_23_P117546	-1.74116	1.87541e-08
				A_33_P3254510	-1.20008	4.48023e-07						A_24_P307384	-1.16755	5.58855e-06				beaded filament structural protein 1, filensin	BFSP1	A_23_P109171	-1.17151	3.36066e-07				heterogeneous nuclear ribonucleoprotein C (C1/C2)	HNRNPC	A_32_P142028	-1.71893	6.79182e-07				general transcription factor IIF, polypeptide 1, 74kDa	GTF2F1	A_23_P16143	-1.7354	4.83085e-08				chromosome 12 open reading frame 75	C12orf75	A_32_P163089	-1.71919	2.22434e-08
		fatty acid binding protein 6, ileal	FABP6	A_23_P43846	-1.18521	2.54033e-06				cutC copper transporter homolog (E. coli)	CUTC	A_23_P98015	-1.16435	7.59571e-06				replication protein A1, 70kDa	RPA1	A_23_P107073	-1.16844	2.11388e-05				trafficking protein particle complex 3	TRAPPC3	A_23_P200535	-1.71511	2.70543e-08						A_33_P3354296	-1.73286	3.78059e-08				Rho guanine nucleotide exchange factor (GEF) 1	ARHGEF1	A_24_P202581	-1.71151	2.7326e-09
		replication protein A1, 70kDa	RPA1	A_23_P107073	-1.18391	1.84127e-05				RAN binding protein 1	RANBP1	A_23_P91590	-1.16302	6.6839e-05				heat shock 70kDa protein 4	HSPA4	A_24_P377277	-1.15866	1.05352e-07						A_33_P3280549	-1.70317	7.10234e-06				nth endonuclease III-like 1 (E. coli)	NTHL1	A_23_P88904	-1.72868	9.31986e-09				DnaJ (Hsp40) homolog, subfamily C, member 5	DNAJC5	A_33_P3419733	-1.71142	2.18679e-06
		heat shock protein 90kDa alpha (cytosolic), class B member 2, pseudogene	HSP90AB2P	A_33_P3324890	-1.18154	8.11438e-06				beaded filament structural protein 1, filensin	BFSP1	A_23_P109171	-1.14672	4.33762e-07				RAN binding protein 1 pseudogene	LOC727803	A_21_P0014871	-1.15257	0.00263398				proteasome (prosome, macropain) 26S subunit, non-ATPase, 6	PSMD6	A_23_P109928	-1.69819	2.93813e-09				stress-induced-phosphoprotein 1	STIP1	A_24_P327815	-1.72286	1.21921e-07				heterogeneous nuclear ribonucleoprotein C (C1/C2)	HNRNPC	A_32_P142028	-1.70976	7.23271e-07
		transmembrane protein 184B	TMEM184B	A_23_P17870	-1.17057	2.03138e-06						A_33_P3267865	-1.14324	1.60567e-06				RAN binding protein 1	RANBP1	A_23_P91590	-1.15254	7.30717e-05				suppression of tumorigenicity 13 (colon carcinoma) (Hsp70 interacting protein)	ST13	A_32_P156892	-1.6866	5.67331e-08				TRAF3 interacting protein 2	TRAF3IP2	A_23_P110879	-1.70559	3.50715e-07				CDC42 effector protein (Rho GTPase binding) 2	CDC42EP2	A_23_P1602	-1.70601	2.9591e-07
		uncharacterized LOC100302640	LOC100302640	A_21_P0000557	-1.16912	2.07492e-07				uncharacterized LOC440292	LOC440292	A_24_P367329	-1.13568	2.28397e-06				RAB, member of RAS oncogene family-like 2A	RABL2A	A_24_P911094	-1.15196	9.09384e-08				son of sevenless homolog 2 (Drosophila)	SOS2	A_23_P117546	-1.64519	3.81673e-08				selenoprotein K	SELK	A_23_P364517	-1.70234	2.66977e-09				proteasome (prosome, macropain) 26S subunit, non-ATPase, 6	PSMD6	A_23_P109928	-1.69412	3.03029e-09
		Rho guanine nucleotide exchange factor (GEF) 1	ARHGEF1	A_24_P202581	-1.15849	3.55202e-07				chromosome 12 open reading frame 75	C12orf75	A_32_P163089	-1.13382	3.25062e-06				transmembrane protein 184B	TMEM184B	A_23_P17870	-1.14666	2.56898e-06				peptidylprolyl isomerase (cyclophilin)-like 1	PPIL1	A_23_P133995	-1.63603	2.98287e-07				Rho guanine nucleotide exchange factor (GEF) 1	ARHGEF1	A_24_P202581	-1.67802	3.52468e-09				selenoprotein K	SELK	A_23_P364517	-1.69277	2.87096e-09
				A_32_P514599	-1.15382	1.2137e-05				proteasome (prosome, macropain) subunit, beta type, 5	PSMB5	A_23_P37191	-1.13284	4.6147e-06						A_24_P375849	-1.13376	1.34321e-06				proteasome (prosome, macropain) 26S subunit, ATPase, 4	PSMC4	A_24_P91310	-1.62964	4.26335e-08				biorientation of chromosomes in cell division 1-like	BOD1L	A_24_P231057	-1.67267	3.49028e-07				nuclear receptor subfamily 1, group D, member 1	NR1D1	A_24_P250227	-1.68587	1.04647e-08
		thromboxane A synthase 1 (platelet)	TBXAS1	A_19_P00318418	-1.15036	3.39662e-07				septin 2	SEPT2	A_24_P43092	-1.1296	1.93321e-08				myeloid leukemia factor 2	MLF2	A_23_P13873	-1.13167	2.30778e-07				tetratricopeptide repeat domain 8	TTC8	A_32_P169735	-1.6281	8.38375e-08				son of sevenless homolog 2 (Drosophila)	SOS2	A_23_P117546	-1.67155	3.12986e-08				proteasome (prosome, macropain) 26S subunit, ATPase, 4	PSMC4	A_24_P91310	-1.67013	3.13907e-08
		syntaxin 8	STX8	A_23_P146908	-1.13875	6.20545e-09				angiomotin like 2	AMOTL2	A_23_P166686	-1.12574	3.77484e-05						A_33_P3347055	-1.12131	0.000912285				Rho GTPase activating protein 11A	ARHGAP11A	A_24_P296254	-1.6252	2.34194e-08				transaldolase 1	TALDO1	A_32_P18258	-1.66464	6.3362e-07					XLOC_005918	A_21_P0005182	-1.6597	9.51664e-08
		chloride channel 2	CLCN2	A_21_P0000083	-1.13584	1.06731e-05						A_33_P3354296	-1.1254	6.1809e-06				TMEM56-RWDD3 readthrough	TMEM56-RWDD3	A_21_P0000145	-1.11676	1.68028e-05				selenoprotein K	SELK	A_23_P364517	-1.59465	6.17854e-09				trafficking protein particle complex 3	TRAPPC3	A_23_P200535	-1.66214	4.00382e-08						A_33_P3280549	-1.65683	9.58961e-06
		coiled-coil domain containing 22	CCDC22	A_23_P114144	-1.13099	4.8281e-06				fatty acid binding protein 6, ileal	FABP6	A_23_P43846	-1.12452	4.5848e-06				transmembrane protein 237	TMEM237	A_24_P941831	-1.1164	2.28978e-05						A_33_P3354296	-1.58985	1.09607e-07				proteasome (prosome, macropain) 26S subunit, non-ATPase, 6	PSMD6	A_23_P109928	-1.64948	4.27182e-09				cysteine-serine-rich nuclear protein 1	CSRNP1	A_23_P121011	-1.63845	2.17679e-09
		cutC copper transporter homolog (E. coli)	CUTC	A_23_P98015	-1.12653	1.08666e-05						A_24_P375683	-1.11927	0.000937448				retinoid X receptor, alpha	RXRA	A_23_P423197	-1.10946	1.52906e-06				serine/threonine/tyrosine interacting-like 1	STYXL1	A_23_P111635	-1.57035	5.4099e-07				proteasome (prosome, macropain) 26S subunit, ATPase, 4	PSMC4	A_24_P91310	-1.62302	4.48501e-08				suppression of tumorigenicity 13 (colon carcinoma) (Hsp70 interacting protein)	ST13	A_32_P156892	-1.63714	8.19321e-08
				A_33_P3366224	-1.1259	3.20203e-06				thromboxane A synthase 1 (platelet)	TBXAS1	A_19_P00318418	-1.11899	4.72219e-07				trafficking protein particle complex 3	TRAPPC3	A_23_P200535	-1.10366	5.09171e-06				tetratricopeptide repeat domain 12	TTC12	A_23_P24535	-1.56991	6.16111e-10				family with sequence similarity 117, member A	FAM117A	A_23_P78053	-1.6221	1.70288e-08						A_33_P3354296	-1.62625	8.30161e-08
		myeloid leukemia factor 2	MLF2	A_23_P13873	-1.12523	2.47196e-07				DEAD (Asp-Glu-Ala-Asp) box polypeptide 39B	DDX39B	A_24_P904903	-1.11755	1.30948e-06						A_33_P3354296	-1.10353	7.66424e-06				NSFL1 (p97) cofactor (p47)	NSFL1C	A_24_P65864	-1.56926	1.6147e-07				beaded filament structural protein 1, filensin	BFSP1	A_23_P109171	-1.61857	6.08787e-09				trafficking protein particle complex 3	TRAPPC3	A_23_P200535	-1.62044	5.49009e-08
				A_24_P247074	-1.12187	2.92001e-05				HAUS augmin-like complex, subunit 1	HAUS1	A_23_P413796	-1.10951	6.22525e-06				heat shock 70kDa protein 1A	HSPA1A	A_23_P111132	-1.09139	6.52641e-07				proteasome (prosome, macropain) subunit, alpha type, 4	PSMA4	A_24_P124992	-1.56588	4.80022e-08				nuclear receptor subfamily 1, group D, member 1	NR1D1	A_24_P250227	-1.61718	1.77139e-08				RAN binding protein 1	RANBP1	A_23_P91590	-1.61432	2.00853e-06
		chromosome 3 open reading frame 78	C3orf78	A_23_P370924	-1.11979	3.80171e-05				heat shock 70kDa protein 1A	HSPA1A	A_23_P111132	-1.09743	6.11561e-07				septin 2	SEPT2	A_24_P43092	-1.0865	3.14986e-08				DEAD (Asp-Glu-Ala-Asp) box polypeptide 39B	DDX39B	A_24_P904903	-1.56242	2.26633e-08				proteasome (prosome, macropain) subunit, alpha type, 4	PSMA4	A_24_P124992	-1.61629	3.23433e-08				ring finger protein 10	RNF10	A_24_P261724	-1.61405	3.55931e-11
		septin 2	SEPT2	A_24_P43092	-1.11386	2.30626e-08				myeloid leukemia factor 2	MLF2	A_23_P13873	-1.09712	3.34966e-07						A_33_P3366224	-1.08234	4.97623e-06				RAN binding protein 1	RANBP1	A_23_P91590	-1.56085	2.94439e-06					XLOC_l2_000636	A_21_P0010740	-1.60854	4.5e-08				beaded filament structural protein 1, filensin	BFSP1	A_23_P109171	-1.60677	6.68447e-09
		proteasome (prosome, macropain) subunit, beta type, 5	PSMB5	A_23_P37191	-1.11255	5.6378e-06				cerebral cavernous malformation 2	CCM2	A_33_P3209476	-1.09626	3.78793e-06				thromboxane A synthase 1 (platelet)	TBXAS1	A_19_P00318418	-1.07385	7.67725e-07						A_24_P50437	-1.55772	7.33487e-07				peptidylprolyl isomerase (cyclophilin)-like 1	PPIL1	A_23_P133995	-1.58898	4.22747e-07				RAB13, member RAS oncogene family	RAB13	A_23_P46369	-1.60108	8.57786e-09
		TMEM56-RWDD3 readthrough	TMEM56-RWDD3	A_21_P0000145	-1.1037	1.90217e-05						A_24_P375849	-1.08823	2.15016e-06				uncharacterized LOC440292	LOC440292	A_24_P367329	-1.068	4.56019e-06				ring finger protein 10	RNF10	A_24_P261724	-1.55527	5.83233e-11				pituitary tumor-transforming 1 interacting protein	PTTG1IP	A_24_P391260	-1.58317	6.69619e-07				nucleotide-binding oligomerization domain containing 1	NOD1	A_24_P129277	-1.57584	1.14438e-08
		angiomotin like 2	AMOTL2	A_23_P166686	-1.10329	4.62854e-05				ybeY metallopeptidase (putative)	YBEY	A_32_P18547	-1.0816	1.58012e-08				tetratricopeptide repeat domain 8	TTC8	A_32_P169735	-1.06484	1.15193e-05				CWC22 spliceosome-associated protein homolog (S. cerevisiae)	CWC22	A_23_P373799	-1.53838	1.49397e-07				CWC22 spliceosome-associated protein homolog (S. cerevisiae)	CWC22	A_23_P373799	-1.56448	1.21687e-07				t-complex 1	TCP1	A_33_P3349947	-1.56864	1.38127e-07
		nth endonuclease III-like 1 (E. coli)	NTHL1	A_23_P88904	-1.09844	2.27349e-06						A_32_P514599	-1.07394	2.58619e-05				proteasome (prosome, macropain) subunit, beta type, 5	PSMB5	A_23_P37191	-1.05655	9.91257e-06				TRAF3 interacting protein 2	TRAF3IP2	A_23_P110879	-1.53466	1.21633e-06				PTPRF interacting protein, binding protein 1 (liprin beta 1)	PPFIBP1	A_23_P337917	-1.55779	4.81537e-07				calcium/calmodulin-dependent protein kinase I	CAMK1	A_23_P121215	-1.5411	2.18274e-07
		beaded filament structural protein 1, filensin	BFSP1	A_23_P109171	-1.0972	7.30991e-07				syntaxin 8	STX8	A_23_P146908	-1.06717	1.41669e-08				ybeY metallopeptidase (putative)	YBEY	A_33_P3406004	-1.05649	4.90121e-08				general transcription factor IIF, polypeptide 1, 74kDa	GTF2F1	A_23_P16143	-1.53116	2.23976e-07				HAUS augmin-like complex, subunit 1	HAUS1	A_23_P413796	-1.55306	1.23626e-07				heat shock 70kDa protein 4	HSPA4	A_24_P377277	-1.53925	2.9459e-09
		heat shock 70kDa protein 1A	HSPA1A	A_23_P111132	-1.09676	6.15972e-07				COMM domain containing 4	COMMD4	A_24_P93371	-1.0636	1.95697e-08				selenoprotein K	SELK	A_23_P364517	-1.05252	1.01248e-06				RAN binding protein 1 pseudogene	LOC727803	A_21_P0014871	-1.52836	0.000266206				heat shock 70kDa protein 4	HSPA4	A_24_P377277	-1.54095	2.90425e-09						A_32_P148476	-1.52473	5.67872e-09
		chromosome 9 open reading frame 43	C9orf43	A_23_P320862	-1.08679	9.1966e-08				transmembrane protein 237	TMEM237	A_24_P941831	-1.06064	3.88039e-05						A_32_P148476	-1.05194	5.57113e-07				HAUS augmin-like complex, subunit 1	HAUS1	A_23_P413796	-1.52682	1.52166e-07				NSFL1 (p97) cofactor (p47)	NSFL1C	A_24_P65864	-1.52663	2.25398e-07				TRAF3 interacting protein 2	TRAF3IP2	A_23_P110879	-1.51166	1.44836e-06
		ybeY metallopeptidase (putative)	YBEY	A_32_P18547	-1.08438	1.52969e-08				transmembrane protein 191B	TMEM191B	A_21_P0012250	-1.05264	1.04789e-05				HAUS augmin-like complex, subunit 1	HAUS1	A_23_P413796	-1.03848	1.27629e-05				heat shock 70kDa protein 4	HSPA4	A_24_P377277	-1.51586	3.58758e-09				ring finger protein 10	RNF10	A_24_P261724	-1.51457	8.29429e-11				heat shock 27kDa protein 1	HSPB1	A_33_P3353242	-1.51011	1.44379e-08
		chromosome 4 open reading frame 29	C4orf29	A_23_P167358	-1.0803	2.59665e-05				sirtuin 5	SIRT5	A_33_P3271755	-1.04841	6.11777e-05				DEAD (Asp-Glu-Ala-Asp) box polypeptide 39B	DDX39B	A_24_P904903	-1.02788	3.39865e-06				solute carrier family 41, member 1	SLC41A1	A_24_P122732	-1.51532	1.59599e-10				homeobox containing 1	HMBOX1	A_23_P134684	-1.50173	5.90418e-08				biorientation of chromosomes in cell division 1-like	BOD1L	A_24_P231057	-1.50803	1.1831e-06
				A_24_P375683	-1.07991	0.00124704				small nucleolar RNA, C/D box 34	SNORD34	A_21_P0000219	-1.04048	1.01075e-06						A_24_P307384	-1.02764	2.20439e-05				septin 2	SEPT2	A_24_P43092	-1.50185	4.94971e-10				tetratricopeptide repeat domain 12	TTC12	A_23_P24535	-1.49354	1.18052e-09					XLOC_l2_000636	A_21_P0010740	-1.5059	1.01573e-07
				A_24_P375849	-1.07893	2.37077e-06						A_33_P3254510	-1.03918	2.39095e-06				lysozyme G-like 1	LYG1	A_23_P165707	-1.01541	4.61865e-06				canopy 2 homolog (zebrafish)	CNPY2	A_23_P53288	-1.49682	1.11999e-08					XLOC_l2_000636	A_21_P0010575	-1.49245	1.58604e-08				interleukin 18 receptor 1	IL18R1	A_24_P208567	-1.50114	8.41126e-08
		tetratricopeptide repeat domain 8	TTC8	A_32_P169735	-1.07509	1.03909e-05				TMEM56-RWDD3 readthrough	TMEM56-RWDD3	A_21_P0000145	-1.03891	3.56004e-05				spastic ataxia of Charlevoix-Saguenay (sacsin)	SACS	A_33_P3405500	-1.00478	1.56869e-07				Rho guanine nucleotide exchange factor (GEF) 1	ARHGEF1	A_24_P202581	-1.49387	1.55166e-08				t-complex 1	TCP1	A_33_P3349947	-1.48491	2.68377e-07				solute carrier family 41, member 1	SLC41A1	A_24_P122732	-1.49527	1.90285e-10
		HIRA interacting protein 3	HIRIP3	A_24_P142269	-1.06931	8.13095e-06				ybeY metallopeptidase (putative)	YBEY	A_33_P3406004	-1.0384	6.07118e-08				HIRA interacting protein 3	HIRIP3	A_24_P142269	-1.00336	1.61125e-05				family with sequence similarity 117, member A	FAM117A	A_23_P78053	-1.48755	5.03293e-08				septin 2	SEPT2	A_24_P43092	-1.48489	5.74329e-10				CWC22 spliceosome-associated protein homolog (S. cerevisiae)	CWC22	A_23_P373799	-1.47846	2.4173e-07
				A_33_P3354296	-1.05897	1.19727e-05				EF-hand domain family, member D1	EFHD1	A_33_P3418716	-1.03791	1.37454e-05				chromosome 3 open reading frame 78	C3orf78	A_23_P370924	-1.00293	0.000112847				beaded filament structural protein 1, filensin	BFSP1	A_23_P109171	-1.48307	1.84688e-08						A_33_P3280549	-1.48362	3.07615e-05				NSFL1 (p97) cofactor (p47)	NSFL1C	A_24_P65864	-1.47679	3.35897e-07
		NSFL1 (p97) cofactor (p47)	NSFL1C	A_24_P65864	-1.0537	1.54187e-05				Rho GTPase activating protein 11A	ARHGAP11A	A_24_P296254	-1.0284	5.39782e-06				syntaxin 8	STX8	A_23_P146908	-0.99819	3.28194e-08				chromosome 16 open reading frame 42	C16orf42	A_23_P88753	-1.48214	3.34804e-08				estrogen receptor binding site associated, antigen, 9	EBAG9	A_24_P98263	-1.47931	7.65254e-09				Rho GTPase activating protein 11A	ARHGAP11A	A_24_P296254	-1.47674	7.71305e-08
		DEAD (Asp-Glu-Ala-Asp) box polypeptide 39B	DDX39B	A_24_P904903	-1.05317	2.58322e-06						A_24_P50437	-1.02377	7.01528e-05				stress-induced-phosphoprotein 1	STIP1	A_24_P327815	-0.9938	5.80231e-05						A_24_P213228	-1.47845	1.30264e-07				transmembrane protein 191B	TMEM191B	A_21_P0012250	-1.46131	2.44154e-07				thromboxane A synthase 1 (platelet)	TBXAS1	A_19_P00318418	-1.46838	1.68289e-08
		stress-induced-phosphoprotein 1	STIP1	A_24_P327815	-1.05234	3.25505e-05				aspartyl-tRNA synthetase	DARS	A_33_P3531857	-1.01763	6.64902e-07				ybeY metallopeptidase (putative)	YBEY	A_32_P18547	-0.988731	4.86457e-08						A_24_P76358	-1.47539	1.30189e-06				dynein, cytoplasmic 1, light intermediate chain 2	DYNC1LI2	A_33_P3374758	-1.4583	6.1006e-06				succinate dehydrogenase complex, subunit A, flavoprotein (Fp)	SDHA	A_32_P67259	-1.46629	4.34996e-07
		small Cajal body-specific RNA 15	SCARNA15	A_21_P0008664	-1.05183	3.18601e-06				transmembrane protein 184B	TMEM184B	A_23_P17870	-1.0158	9.83678e-06				ring finger protein 10	RNF10	A_24_P261724	-0.987497	2.12201e-08				calcium/calmodulin-dependent protein kinase I	CAMK1	A_23_P121215	-1.47495	3.69696e-07				chromosome 16 open reading frame 42	C16orf42	A_23_P88753	-1.44517	4.58648e-08				transmembrane protein 237	TMEM237	A_24_P941831	-1.465	1.13723e-06
		COMM domain containing 4	COMMD4	A_24_P93371	-1.04442	2.46005e-08				cytidine monophosphate (UMP-CMP) kinase 1, cytosolic	CMPK1	A_33_P3317988	-1.0115	1.26334e-05				COMM domain containing 4	COMMD4	A_24_P93371	-0.984506	5.14166e-08				pituitary tumor-transforming 1 interacting protein	PTTG1IP	A_24_P391260	-1.47451	1.53264e-06				solute carrier family 41, member 1	SLC41A1	A_24_P122732	-1.44069	3.10537e-10				serrate RNA effector molecule homolog (Arabidopsis)	SRRT	A_33_P3299590	-1.45408	1.63099e-05
		chromosome 12 open reading frame 75	C12orf75	A_32_P163089	-1.02922	9.46578e-06				cytochrome c oxidase subunit IV isoform 1	COX4I1	A_23_P141032	-1.00893	8.58405e-06				transmembrane protein 191B	TMEM191B	A_21_P0012250	-0.982624	2.17646e-05				t-complex 1	TCP1	A_33_P3349947	-1.4666	3.11482e-07				DEAD (Asp-Glu-Ala-Asp) box polypeptide 39B	DDX39B	A_24_P904903	-1.43027	6.81532e-08				lon peptidase 1, mitochondrial	LONP1	A_33_P3312365	-1.45318	1.2693e-06
		SUB1 homolog (S. cerevisiae)	SUB1	A_24_P320328	-1.02763	0.000594286				basic transcription factor 3 pseudogene 11	BTF3P11	A_23_P105900	-1.00852	7.17099e-08				peptidylprolyl isomerase (cyclophilin)-like 1	PPIL1	A_23_P133995	-0.980414	8.24888e-05				proteasome (prosome, macropain) 26S subunit, non-ATPase, 5	PSMD5	A_33_P3305254	-1.45878	1.1464e-07				tetratricopeptide repeat domain 8	TTC8	A_32_P169735	-1.4271	4.13625e-07				far upstream element (FUSE) binding protein 1	FUBP1	A_23_P45699	-1.44844	5.93555e-07
				A_24_P213228	-1.02464	9.08727e-06						A_32_P148476	-1.00649	9.36091e-07				estrogen receptor binding site associated, antigen, 9	EBAG9	A_24_P98263	-0.976283	1.23169e-06				myosin, light chain 5, regulatory	MYL5	A_23_P258018	-1.45821	2.826e-10				procollagen-lysine, 2-oxoglutarate 5-dioxygenase 1	PLOD1	A_23_P137532	-1.41963	2.92233e-05				DEAD (Asp-Glu-Ala-Asp) box polypeptide 39B	DDX39B	A_24_P904903	-1.44623	5.94157e-08
		aspartyl-tRNA synthetase	DARS	A_33_P3531857	-1.01907	6.5391e-07				peptidylprolyl isomerase (cyclophilin)-like 1	PPIL1	A_23_P133995	-1.0014	6.70158e-05				cytochrome c oxidase subunit IV isoform 1	COX4I1	A_23_P141032	-0.972346	1.27834e-05				CDC42 effector protein (Rho GTPase binding) 2	CDC42EP2	A_23_P1602	-1.4436	2.09372e-06				heat shock 27kDa protein 1	HSPB1	A_33_P3353242	-1.41522	3.26465e-08				uncharacterized LOC145820	LOC145820	A_33_P3490794	-1.44102	3.48736e-09
		ybeY metallopeptidase (putative)	YBEY	A_33_P3406004	-1.0135	8.19163e-08						A_33_P3347055	-0.988195	0.00241346					LOC100507149	A_21_P0014843	-0.971812	0.000151848				natural killer-tumor recognition sequence	NKTR	A_24_P926760	-1.43499	8.55193e-08				proteasome (prosome, macropain) 26S subunit, non-ATPase, 5	PSMD5	A_33_P3305254	-1.41051	1.72739e-07				peptidylprolyl isomerase (cyclophilin)-like 1	PPIL1	A_23_P133995	-1.43876	1.35561e-06
		heat shock 70kDa protein 4	HSPA4	A_24_P377277	-1.00852	5.60537e-07						A_24_P7750	-0.987943	7.56798e-06				G protein pathway suppressor 1	GPS1	A_23_P158662	-0.962973	3.13672e-05				syntaxin 8	STX8	A_23_P146908	-1.43233	3.16461e-10				differentially expressed in FDCP 8 homolog (mouse)	DEF8	A_24_P193582	-1.40969	4.76654e-09				tryptophan rich basic protein	WRB	A_23_P80122	-1.43374	5.93408e-05
		cytidine monophosphate N-acetylneuraminic acid synthetase	CMAS	A_32_P73045	-1.00378	6.25116e-08				stress-induced-phosphoprotein 1	STIP1	A_24_P327815	-0.986919	6.21668e-05						A_24_P213228	-0.961142	1.80112e-05						A_32_P148476	-1.42911	1.29495e-08				serine/threonine/tyrosine interacting-like 1	STYXL1	A_23_P111635	-1.39977	2.06038e-06				tetratricopeptide repeat domain 12	TTC12	A_23_P24535	-1.43069	2.06177e-09
		peptidylprolyl isomerase (cyclophilin)-like 1	PPIL1	A_23_P133995	-1.00359	6.55854e-05				PTPRF interacting protein, binding protein 1 (liprin beta 1)	PPFIBP1	A_23_P337917	-0.981718	7.46628e-05				eukaryotic translation termination factor 1	ETF1	A_21_P0013769	-0.959801	1.77626e-05				tryptophan rich basic protein	WRB	A_23_P80122	-1.42008	6.52444e-05				lon peptidase 1, mitochondrial	LONP1	A_33_P3312365	-1.39789	1.98314e-06				family with sequence similarity 117, member A	FAM117A	A_23_P78053	-1.42269	8.72957e-08
		serine/threonine/tyrosine interacting-like 1	STYXL1	A_23_P111635	-0.995966	7.72208e-05				estrogen receptor binding site associated, antigen, 9	EBAG9	A_24_P98263	-0.979788	1.18156e-06				nth endonuclease III-like 1 (E. coli)	NTHL1	A_23_P88904	-0.953678	1.08846e-05				estrogen receptor binding site associated, antigen, 9	EBAG9	A_24_P98263	-1.41315	1.36834e-08				syntaxin 8	STX8	A_23_P146908	-1.39693	4.39543e-10					XLOC_l2_000636	A_21_P0010575	-1.4226	2.89759e-08
		basic transcription factor 3 pseudogene 11	BTF3P11	A_23_P105900	-0.988534	9.17404e-08				HIRA interacting protein 3	HIRIP3	A_24_P142269	-0.979366	2.07909e-05				adiponectin receptor 1	ADIPOR1	A_23_P46627	-0.951121	1.73688e-06				chromosome 4 open reading frame 29	C4orf29	A_23_P167358	-1.4098	1.39475e-06				calcium/calmodulin-dependent protein kinase I	CAMK1	A_23_P121215	-1.39275	7.29173e-07				proteasome (prosome, macropain) subunit, beta type, 5	PSMB5	A_23_P37191	-1.41762	3.45444e-07
		G protein pathway suppressor 1	GPS1	A_23_P158662	-0.987601	2.41618e-05				chloride channel 2	CLCN2	A_21_P0000083	-0.978267	5.05033e-05					SDIM1	A_21_P0014941	-0.94972	0.000200499				serrate RNA effector molecule homolog (Arabidopsis)	SRRT	A_33_P3299590	-1.40441	2.34927e-05						A_33_P3254510	-1.386	7.82947e-08				NADH dehydrogenase (ubiquinone) 1 beta subcomplex, 9, 22kDa	NDUFB9	A_24_P154006	-1.41653	1.69197e-08
		proteasome (prosome, macropain) 26S subunit, non-ATPase, 5	PSMD5	A_33_P3305254	-0.985123	1.07424e-05				heat shock 70kDa protein 4	HSPA4	A_24_P377277	-0.97382	8.46253e-07				chromosome 4 open reading frame 29	C4orf29	A_23_P167358	-0.944759	9.93429e-05				cytochrome c oxidase subunit IV isoform 1	COX4I1	A_23_P141032	-1.39138	2.1174e-07				Rho GTPase activating protein 11A	ARHGAP11A	A_24_P296254	-1.38389	1.70677e-07				estrogen receptor binding site associated, antigen, 9	EBAG9	A_24_P98263	-1.41616	1.33203e-08
		retinoid X receptor, alpha	RXRA	A_23_P423197	-0.981689	6.07087e-06				NSFL1 (p97) cofactor (p47)	NSFL1C	A_24_P65864	-0.968346	3.71192e-05				RAN binding protein 9	RANBP9	A_24_P226355	-0.935712	2.61937e-05				heat shock 27kDa protein 1	HSPB1	A_33_P3353242	-1.39065	4.0617e-08						A_32_P148476	-1.37109	2.18462e-08				vacuolar protein sorting 26 homolog A (S. pombe)	VPS26A	A_23_P75255	-1.4152	1.03716e-07
		RAN binding protein 9	RANBP9	A_24_P226355	-0.975993	1.68508e-05				serine/threonine/tyrosine interacting-like 1	STYXL1	A_23_P111635	-0.963052	0.000106947				sirtuin 5	SIRT5	A_33_P3271755	-0.933071	0.000187009				proteasome (prosome, macropain) subunit, beta type, 5	PSMB5	A_23_P37191	-1.39028	4.3576e-07						A_24_P76358	-1.36745	3.10026e-06				cytochrome c oxidase subunit IV isoform 1	COX4I1	A_23_P141032	-1.41275	1.76053e-07
		succinate dehydrogenase complex, subunit A, flavoprotein (Fp)	SDHA	A_32_P67259	-0.975991	3.97239e-05						A_33_P3252491	-0.962791	0.000740277				SPRY domain containing 3	SPRYD3	A_23_P65129	-0.92678	8.71966e-05					XLOC_l2_000636	A_21_P0010740	-1.38965	2.69476e-07				coiled-coil domain containing 22	CCDC22	A_23_P114144	-1.36393	5.62779e-07				mitochondrial ribosomal protein L37	MRPL37	A_33_P3297921	-1.4098	3.96737e-06
		interleukin 18 receptor 1	IL18R1	A_24_P208567	-0.969404	1.32365e-05				ring finger protein 10	RNF10	A_24_P261724	-0.949868	3.45288e-08				deoxyhypusine synthase	DHPS	A_23_P501887	-0.92114	6.84039e-07				coiled-coil domain containing 22	CCDC22	A_23_P114144	-1.38771	4.5854e-07				exocyst complex component 3-like 4	EXOC3L4	A_33_P3360972	-1.35246	3.60775e-06				calmodulin-like 3	CALML3	A_23_P393080	-1.40975	7.82717e-10
		transmembrane protein 191B	TMEM191B	A_21_P0012250	-0.962393	2.70204e-05				nth endonuclease III-like 1 (E. coli)	NTHL1	A_23_P88904	-0.946436	1.18139e-05						A_32_P31992	-0.920343	6.42442e-08				thromboxane A synthase 1 (platelet)	TBXAS1	A_19_P00318418	-1.37977	3.67452e-08				canopy 2 homolog (zebrafish)	CNPY2	A_23_P53288	-1.34727	4.20576e-08						A_24_P306469	-1.40953	1.11975e-05
		cerebral cavernous malformation 2	CCM2	A_33_P3209476	-0.954102	1.71801e-05				Rho guanine nucleotide exchange factor (GEF) 1	ARHGEF1	A_24_P202581	-0.946142	3.71468e-06				TPTE pseudogene	psiTPTE22	A_21_P0012240	-0.919811	0.000239492				chromosome 12 open reading frame 75	C12orf75	A_32_P163089	-1.37916	3.33399e-07				EF-hand domain family, member D1	EFHD1	A_33_P3418716	-1.33596	8.10006e-07				transmembrane protein 191B	TMEM191B	A_21_P0012250	-1.40891	3.78301e-07
		deoxyhypusine synthase	DHPS	A_23_P501887	-0.948598	4.83435e-07				coiled-coil domain containing 22	CCDC22	A_23_P114144	-0.9412	3.43214e-05				transmembrane phosphatase with tensin homology	TPTE	A_33_P3247392	-0.91655	2.64244e-05				heterogeneous nuclear ribonucleoprotein L-like	HNRPLL	A_33_P3371910	-1.37733	1.86043e-07				RAN binding protein 1 pseudogene	LOC727803	A_21_P0014871	-1.32101	0.000927462				ZW10 interactor	ZWINT	A_33_P3212994	-1.40695	1.22275e-07
		cytochrome c oxidase subunit IV isoform 1	COX4I1	A_23_P141032	-0.948008	1.67389e-05						A_24_P247074	-0.94	0.000166035				PTPRF interacting protein, binding protein 1 (liprin beta 1)	PPFIBP1	A_23_P337917	-0.914063	0.000148209						A_33_P3347055	-1.37374	0.000154369				succinate dehydrogenase complex, subunit A, flavoprotein (Fp)	SDHA	A_32_P67259	-1.31998	1.4903e-06				tetratricopeptide repeat domain 8	TTC8	A_32_P169735	-1.4038	5.0302e-07
				A_24_P7750	-0.946751	1.19998e-05				adiponectin receptor 1	ADIPOR1	A_23_P46627	-0.939307	2.00408e-06				transaldolase 1	TALDO1	A_32_P18258	-0.911271	0.000344825						A_24_P306469	-1.37289	1.48397e-05				nucleotide-binding oligomerization domain containing 1	NOD1	A_24_P129277	-1.31942	1.04947e-07				leucine carboxyl methyltransferase 1	LCMT1	A_23_P112825	-1.40375	2.12945e-08
		stathmin 1	STMN1	A_19_P00316238	-0.940183	4.57501e-05				RAN binding protein 9	RANBP9	A_24_P226355	-0.938883	2.52908e-05				FtsJ homolog 3 (E. coli)	FTSJ3	A_23_P55091	-0.907609	7.16067e-05				U2 snRNP-associated SURP domain containing	U2SURP	A_24_P943106	-1.37183	1.93977e-07				calmodulin-like 3	CALML3	A_23_P393080	-1.31919	1.85552e-09				CTD (carboxy-terminal domain, RNA polymerase II, polypeptide A) small phosphatase 2	CTDSP2	A_33_P3267280	-1.3951	2.5403e-08
		TRAF3 interacting protein 2	TRAF3IP2	A_23_P110879	-0.939716	0.000207732						A_24_P255314	-0.93527	0.000537691				heat shock 70kDa protein 1B	HSPA1B	A_33_P3415430	-0.906818	1.24113e-06				ZW10 interactor	ZWINT	A_33_P3212994	-1.36918	1.70323e-07				erythrocyte membrane protein band 4.1-like 1	EPB41L1	A_23_P154806	-1.31735	5.12449e-08				BCL2-associated athanogene 3	BAG3	A_23_P47077	-1.37231	8.1766e-08
		Rho GTPase activating protein 11A	ARHGAP11A	A_24_P296254	-0.939338	1.44272e-05				RAN binding protein 1 pseudogene	LOC727803	A_21_P0014871	-0.933273	0.0104186				chromobox homolog 5	CBX5	A_23_P2355	-0.906258	3.32603e-05				nuclear receptor subfamily 1, group D, member 1	NR1D1	A_24_P250227	-1.36522	1.44753e-07						A_24_P50437	-1.31351	5.14475e-06				HAUS augmin-like complex, subunit 1	HAUS1	A_23_P413796	-1.36617	5.77479e-07
		reticulon 4 interacting protein 1	RTN4IP1	A_23_P122775	-0.937724	4.19413e-07						A_24_P76358	-0.92977	0.000168118				interferon-induced protein with tetratricopeptide repeats 1	IFIT1	A_23_P52266	-0.901426	6.40881e-05				TBP-like 1	TBPL1	A_33_P3380682	-1.35719	1.65423e-06				RAN binding protein 1	RANBP1	A_23_P91590	-1.3131	1.94014e-05				enhancer of mRNA decapping 4	EDC4	A_33_P3294392	-1.36446	1.64861e-08
		HAUS augmin-like complex, subunit 1	HAUS1	A_23_P413796	-0.934821	3.82462e-05				G protein pathway suppressor 1	GPS1	A_23_P158662	-0.92829	4.55563e-05				basic transcription factor 3 pseudogene 11	BTF3P11	A_23_P105900	-0.8996	2.88354e-07				centrosome and spindle pole associated protein 1	CSPP1	A_23_P71537	-1.35496	1.70972e-07				CDC42 effector protein (Rho GTPase binding) 2	CDC42EP2	A_23_P1602	-1.31106	6.16344e-06				centrosome and spindle pole associated protein 1	CSPP1	A_23_P71537	-1.35978	1.63758e-07
		protein kinase domain containing, cytoplasmic homolog (mouse)	PKDCC	A_32_P112493	-0.932288	0.000559427				chromosome 4 open reading frame 29	C4orf29	A_23_P167358	-0.92578	0.000120664				six transmembrane epithelial antigen of the prostate 1	STEAP1	A_24_P406334	-0.898487	0.000189419				nucleotide-binding oligomerization domain containing 1	NOD1	A_24_P129277	-1.3466	8.17012e-08				myosin, light chain 5, regulatory	MYL5	A_23_P258018	-1.3093	1.15672e-09				cofilin 1 (non-muscle)	CFL1	A_32_P148710	-1.35572	6.02545e-09
				A_24_P50437	-0.928656	0.000178236				retinoid X receptor, alpha	RXRA	A_23_P423197	-0.925076	1.15835e-05				aspartyl-tRNA synthetase	DARS	A_33_P3531857	-0.896181	2.88254e-06				dynein, cytoplasmic 1, light intermediate chain 2	DYNC1LI2	A_33_P3374758	-1.33743	1.5546e-05				transmembrane protein 237	TMEM237	A_24_P941831	-1.30865	4.11367e-06				chromosome 16 open reading frame 42	C16orf42	A_23_P88753	-1.35405	1.02482e-07
		phosphodiesterase 9A	PDE9A	A_23_P29096	-0.9252	1.04515e-05				cytidine monophosphate N-acetylneuraminic acid synthetase	CMAS	A_32_P73045	-0.924572	1.71171e-07				poly(A) binding protein, cytoplasmic 1-like	PABPC1L	A_24_P92183	-0.89385	4.05465e-06				enhancer of mRNA decapping 4	EDC4	A_33_P3294392	-1.33347	2.20193e-08				long intergenic non-protein coding RNA 478	LINC00478	A_33_P3312384	-1.29697	1.21742e-06				basic, immunoglobulin-like variable motif containing	BIVM	A_23_P105833	-1.35401	5.99928e-09
		phosphatidylinositol glycan anchor biosynthesis, class L	PIGL	A_24_P253755	-0.925165	9.99119e-06				NAD synthetase 1	NADSYN1	A_23_P35848	-0.911716	2.2394e-05				cutC copper transporter homolog (E. coli)	CUTC	A_23_P98015	-0.889122	0.000120526					XLOC_l2_000636	A_21_P0010575	-1.32474	7.02793e-08				AP2 associated kinase 1	AAK1	A_33_P3210585	-1.28481	1.50899e-07				natural killer-tumor recognition sequence	NKTR	A_24_P926760	-1.35056	1.79358e-07
		heat shock 70kDa protein 1B	HSPA1B	A_33_P3415430	-0.922925	1.01159e-06				chromosome 14 open reading frame 126	C14orf126	A_23_P37144	-0.904422	7.36293e-06						A_23_P25069	-0.886877	0.000135365						A_33_P3366224	-1.32427	4.89725e-07				cysteine-serine-rich nuclear protein 1	CSRNP1	A_23_P121011	-1.28436	4.7842e-08				U2 snRNP-associated SURP domain containing	U2SURP	A_24_P943106	-1.33952	2.58634e-07
		transmembrane protein 237	TMEM237	A_24_P941831	-0.920398	0.000155131				cofilin 1 (non-muscle)	CFL1	A_32_P148710	-0.893881	1.00164e-06				centrosome and spindle pole associated protein 1	CSPP1	A_23_P71537	-0.885023	2.1672e-05				transmembrane protein 191B	TMEM191B	A_21_P0012250	-1.32206	8.02921e-07				enhancer of mRNA decapping 4	EDC4	A_33_P3294392	-1.28346	3.55424e-08				TBP-like 1	TBPL1	A_33_P3380682	-1.33539	1.99135e-06
		FtsJ homolog 3 (E. coli)	FTSJ3	A_23_P55091	-0.907026	7.20601e-05				heat shock protein 90kDa alpha (cytosolic), class B member 2, pseudogene	HSP90AB2P	A_33_P3324890	-0.893088	0.0001406				far upstream element (FUSE) binding protein 1	FUBP1	A_23_P45699	-0.881097	0.000124573				NADH dehydrogenase (ubiquinone) 1 beta subcomplex, 9, 22kDa	NDUFB9	A_24_P154006	-1.31702	4.21558e-08				leucine carboxyl methyltransferase 1	LCMT1	A_23_P112825	-1.28153	6.62975e-08				heterogeneous nuclear ribonucleoprotein L-like	HNRPLL	A_33_P3371910	-1.33432	2.72846e-07
				A_33_P3376925	-0.90672	1.51705e-05				myosin, light chain 5, regulatory	MYL5	A_23_P258018	-0.888374	1.54978e-07						A_33_P3280549	-0.878433	0.00300839				leucine carboxyl methyltransferase 1	LCMT1	A_23_P112825	-1.31314	4.90249e-08				SH3-domain binding protein 4	SH3BP4	A_23_P79259	-1.27832	1.17903e-07				PTPRF interacting protein, binding protein 1 (liprin beta 1)	PPFIBP1	A_23_P337917	-1.32662	3.09327e-06
		PTPRF interacting protein, binding protein 1 (liprin beta 1)	PPFIBP1	A_23_P337917	-0.90619	0.000160722				cullin 2	CUL2	A_24_P252794	-0.882732	0.00122368						A_33_P3235184	-0.873789	0.000142873				succinate dehydrogenase complex, subunit A, flavoprotein (Fp)	SDHA	A_32_P67259	-1.3119	1.59933e-06						A_24_P213228	-1.27571	7.62073e-07						A_33_P3347055	-1.31841	0.000225777
		cytidine monophosphate (UMP-CMP) kinase 1, cytosolic	CMPK1	A_33_P3317988	-0.900617	4.23315e-05				selenoprotein K	SELK	A_23_P364517	-0.88203	7.45829e-06				biorientation of chromosomes in cell division 1-like	BOD1L	A_24_P231057	-0.871233	0.000343384				mitochondrial intermediate peptidase	MIPEP	A_23_P117274	-1.30821	2.83428e-07				chromosome 12 open reading frame 75	C12orf75	A_32_P163089	-1.27373	8.54581e-07				myosin, light chain 5, regulatory	MYL5	A_23_P258018	-1.31102	1.13713e-09
		NAD synthetase 1	NADSYN1	A_23_P35848	-0.899873	2.56571e-05				reticulon 4 interacting protein 1	RTN4IP1	A_23_P122775	-0.880238	8.84754e-07				suppressor of fused homolog (Drosophila)	SUFU	A_23_P425304	-0.869986	0.000286226						A_33_P3254510	-1.30677	1.60899e-07				uncharacterized LOC145820	LOC145820	A_33_P3490794	-1.27373	1.6809e-08				uncharacterized LOC440292	LOC440292	A_24_P367329	-1.30724	4.4399e-07
		general transcription factor IIF, polypeptide 1, 74kDa	GTF2F1	A_23_P16143	-0.891556	8.65636e-05				magnesium transporter 1	MAGT1	A_33_P3240912	-0.876185	1.51129e-07				proteasome (prosome, macropain) 26S subunit, non-ATPase, 5	PSMD5	A_33_P3305254	-0.860202	4.42487e-05				PTPRF interacting protein, binding protein 1 (liprin beta 1)	PPFIBP1	A_23_P337917	-1.30262	3.79722e-06				ybeY metallopeptidase (putative)	YBEY	A_32_P18547	-1.27284	1.96909e-09				deoxyhypusine synthase	DHPS	A_23_P501887	-1.30437	9.54403e-09
		lysozyme G-like 1	LYG1	A_23_P165707	-0.890658	1.90836e-05				carboxypeptidase, vitellogenic-like	CPVL	A_23_P134347	-0.874222	5.84538e-06				DEAD (Asp-Glu-Ala-Asp) box polypeptide 10	DDX10	A_23_P32938	-0.858906	3.49345e-06				transmembrane protein 237	TMEM237	A_24_P941831	-1.30057	4.40748e-06				ZW10 interactor	ZWINT	A_33_P3212994	-1.27145	4.14977e-07				canopy 2 homolog (zebrafish)	CNPY2	A_23_P53288	-1.30435	6.28457e-08
		adiponectin receptor 1	ADIPOR1	A_23_P46627	-0.884759	3.94088e-06				deoxyhypusine synthase	DHPS	A_23_P501887	-0.872141	1.29447e-06				TRAF3 interacting protein 2	TRAF3IP2	A_23_P110879	-0.857042	0.000471434				erythrocyte membrane protein band 4.1 like 5	EPB41L5	A_33_P3248325	-1.29589	1.36477e-06						A_24_P306469	-1.26282	3.5453e-05				SH3-domain binding protein 4	SH3BP4	A_23_P79259	-1.30118	9.48877e-08
		tubulin, beta 4B class IVb	TUBB4B	A_23_P312863	-0.883494	7.34441e-07				proteasome (prosome, macropain) 26S subunit, non-ATPase, 5	PSMD5	A_33_P3305254	-0.861398	4.36324e-05				SGT1, suppressor of G2 allele of SKP1 (S. cerevisiae)	SUGT1	A_24_P280706	-0.856065	1.55715e-07					SDIM1	A_21_P0014941	-1.28594	9.53895e-06				cleavage stimulation factor, 3' pre-RNA, subunit 3, 77kDa	CSTF3	A_24_P256552	-1.25957	2.88244e-07				general transcription factor IIF, polypeptide 1, 74kDa	GTF2F1	A_23_P16143	-1.29393	1.63091e-06
		spastic ataxia of Charlevoix-Saguenay (sacsin)	SACS	A_33_P3405500	-0.882034	7.44919e-07				eukaryotic translation termination factor 1	ETF1	A_21_P0013769	-0.857383	5.65223e-05				SUB1 homolog (S. cerevisiae)	SUB1	A_24_P320328	-0.854812	0.00252061				chromosome 4 open reading frame 47	C4orf47	A_33_P3247175	-1.28328	2.28408e-06				far upstream element (FUSE) binding protein 1	FUBP1	A_23_P45699	-1.2555	3.09269e-06				far upstream element (FUSE) binding protein 1	FUBP1	A_33_P3281151	-1.29391	2.79626e-08
		myosin, light chain 5, regulatory	MYL5	A_23_P258018	-0.879927	1.7405e-07				tubulin, beta 4B class IVb	TUBB4B	A_23_P312863	-0.853842	1.09444e-06				EF-hand domain family, member D1	EFHD1	A_23_P154338	-0.850788	0.00200937				cofilin 1 (non-muscle)	CFL1	A_32_P148710	-1.27343	1.33633e-08				thromboxane A synthase 1 (platelet)	TBXAS1	A_19_P00318418	-1.25405	1.19586e-07				chromosome 4 open reading frame 29	C4orf29	A_23_P167358	-1.29377	3.70568e-06
		CTD (carboxy-terminal domain, RNA polymerase II, polypeptide A) small phosphatase 2	CTDSP2	A_33_P3267280	-0.879689	6.02818e-06				transmembrane phosphatase with tensin homology	TPTE	A_33_P3247392	-0.846952	5.88967e-05				natural killer-tumor recognition sequence	NKTR	A_24_P926760	-0.850709	3.28664e-05						A_24_P7750	-1.26376	4.53927e-07				RAN binding protein 9	RANBP9	A_24_P226355	-1.25378	1.03711e-06				solute carrier family 37 (glycerol-3-phosphate transporter), member 1	SLC37A1	A_23_P17695	-1.2816	3.59162e-06
		prolyl 4-hydroxylase, alpha polypeptide II	P4HA2	A_23_P30363	-0.875466	1.00467e-06						A_33_P3280549	-0.84573	0.00391723				calcium/calmodulin-dependent protein kinase I	CAMK1	A_23_P121215	-0.847373	0.000146697				lon peptidase 1, mitochondrial	LONP1	A_33_P3312365	-1.26326	6.17729e-06				chromosome 4 open reading frame 47	C4orf47	A_33_P3247175	-1.24763	3.14204e-06				uracil phosphoribosyltransferase (FUR1) homolog (S. cerevisiae)	UPRT	A_24_P185986	-1.27801	1.83489e-07
			LOC100506325	A_21_P0014351	-0.875419	4.47926e-07					XLOC_l2_001134	A_21_P0010778	-0.844227	0.00012442				CTD (carboxy-terminal domain, RNA polymerase II, polypeptide A) small phosphatase 2	CTDSP2	A_33_P3267280	-0.84666	9.15827e-06				calmodulin-like 3	CALML3	A_23_P393080	-1.25911	3.38669e-09				WD repeat domain 78	WDR78	A_33_P3379381	-1.24728	1.19523e-06				proteolipid protein 2 (colonic epithelium-enriched)	PLP2	A_24_P74932	-1.27777	2.52175e-08
		estrogen receptor binding site associated, antigen, 9	EBAG9	A_24_P98263	-0.872018	4.44578e-06				TRAF3 interacting protein 2	TRAF3IP2	A_23_P110879	-0.84417	0.000536686				MIRLET7B host gene (non-protein coding)	MIRLET7BHG	A_33_P3328360	-0.842487	6.41997e-06				RAB, member of RAS oncogene family-like 2A	RABL2A	A_24_P911094	-1.25334	3.19662e-08				mitochondrial intermediate peptidase	MIPEP	A_23_P117274	-1.24506	5.11486e-07				DEAD (Asp-Glu-Ala-Asp) box polypeptide 17	DDX17	A_23_P57534	-1.27669	3.29322e-08
		EF-hand domain family, member D1	EFHD1	A_23_P154338	-0.870372	0.00169321				SPRY domain containing 3	SPRYD3	A_23_P65129	-0.843134	0.000213012				NSFL1 (p97) cofactor (p47)	NSFL1C	A_24_P65864	-0.841483	0.000146971				vacuolar protein sorting 26 homolog A (S. pombe)	VPS26A	A_23_P75255	-1.25196	4.55568e-07				natural killer-tumor recognition sequence	NKTR	A_24_P926760	-1.24349	4.83203e-07				family with sequence similarity 83, member H	FAM83H	A_23_P421175	-1.27442	3.66505e-08
		DEAD (Asp-Glu-Ala-Asp) box polypeptide 10	DDX10	A_23_P32938	-0.865977	3.18588e-06				spastic ataxia of Charlevoix-Saguenay (sacsin)	SACS	A_33_P3405500	-0.842142	1.27773e-06				cytidine monophosphate (UMP-CMP) kinase 1, cytosolic	CMPK1	A_33_P3317988	-0.837816	8.67035e-05				biorientation of chromosomes in cell division 1-like	BOD1L	A_24_P231057	-1.25002	9.71682e-06				RAB, member of RAS oncogene family-like 2A	RABL2A	A_24_P911094	-1.2423	3.57026e-08				EF-hand domain family, member D1	EFHD1	A_23_P154338	-1.2713	6.04833e-05
		interferon-induced protein with tetratricopeptide repeats 1	IFIT1	A_23_P52266	-0.862659	9.84606e-05				DEAD (Asp-Glu-Ala-Asp) box polypeptide 10	DDX10	A_23_P32938	-0.840129	4.47265e-06				cytidine monophosphate N-acetylneuraminic acid synthetase	CMAS	A_32_P73045	-0.836107	5.71219e-07				uncharacterized LOC440292	LOC440292	A_24_P367329	-1.24774	7.69694e-07				U2 snRNP-associated SURP domain containing	U2SURP	A_24_P943106	-1.24107	6.42106e-07				proteasome (prosome, macropain) 26S subunit, non-ATPase, 5	PSMD5	A_33_P3305254	-1.26609	6.29295e-07
				A_33_P3221980	-0.862449	1.73171e-05				heat shock 70kDa protein 1B	HSPA1B	A_33_P3415430	-0.839424	3.0013e-06				Rho GTPase activating protein 11A	ARHGAP11A	A_24_P296254	-0.834082	4.93225e-05				exocyst complex component 3-like 4	EXOC3L4	A_33_P3360972	-1.2418	9.24838e-06				proteasome (prosome, macropain) subunit, beta type, 5	PSMB5	A_23_P37191	-1.23728	1.70329e-06				differentially expressed in FDCP 8 homolog (mouse)	DEF8	A_24_P193582	-1.26179	1.94971e-08
			XLOC_007868	A_21_P0006328	-0.852919	2.61537e-05				vacuolar protein sorting 26 homolog A (S. pombe)	VPS26A	A_23_P75255	-0.838412	3.88488e-05				phospholipase A2 receptor 1, 180kDa	PLA2R1	A_23_P142830	-0.833733	5.08907e-05				aspartyl-tRNA synthetase	DARS	A_33_P3531857	-1.24087	6.04685e-08				NADH dehydrogenase (ubiquinone) 1 beta subcomplex, 9, 22kDa	NDUFB9	A_24_P154006	-1.23292	9.53051e-08						A_24_P50437	-1.26155	8.01641e-06
		endoplasmic reticulum aminopeptidase 2	ERAP2	A_23_P30243	-0.852005	5.15721e-06				interferon-induced protein with tetratricopeptide repeats 1	IFIT1	A_23_P52266	-0.834842	0.000134652				fatty acid binding protein 6, ileal	FABP6	A_23_P43846	-0.833471	0.000103439						A_24_P375849	-1.2407	4.67029e-07				lin-37 homolog (C. elegans)	LIN37	A_23_P165186	-1.2329	1.84639e-06						A_24_P375849	-1.26078	3.85797e-07
		ring finger protein 10	RNF10	A_24_P261724	-0.851299	1.33532e-07						A_33_P3235184	-0.834432	0.000219154				family with sequence similarity 78, member A	FAM78A	A_23_P314250	-0.82992	4.65537e-05				far upstream element (FUSE) binding protein 1	FUBP1	A_23_P45699	-1.24045	3.54204e-06				cytochrome c oxidase subunit IV isoform 1	COX4I1	A_23_P141032	-1.2323	8.96975e-07						A_24_P76358	-1.25898	7.75416e-06
				A_24_P76358	-0.851298	0.000373435				chromosome 9 open reading frame 43	C9orf43	A_23_P320862	-0.833915	2.13248e-06				eukaryotic elongation factor, selenocysteine-tRNA-specific	EEFSEC	A_23_P144202	-0.829431	0.000449524				NADH dehydrogenase (ubiquinone) 1 alpha subcomplex, 13	NDUFA13	A_23_P119627	-1.23711	1.83857e-08				EF-hand domain family, member D1	EFHD1	A_23_P154338	-1.23011	8.36074e-05				TAR (HIV-1) RNA binding protein 1	TARBP1	A_23_P52058	-1.25804	1.48949e-06
				A_32_P148476	-0.849749	6.38659e-06						A_32_P31992	-0.824736	2.45122e-07				inverted formin, FH2 and WH2 domain containing	INF2	A_23_P394836	-0.828924	2.32462e-05				differentially expressed in FDCP 8 homolog (mouse)	DEF8	A_24_P193582	-1.23621	2.52192e-08				uncharacterized LOC440292	LOC440292	A_24_P367329	-1.22825	9.25475e-07				ybeY metallopeptidase (putative)	YBEY	A_33_P3406004	-1.25605	5.52574e-09
		eukaryotic translation termination factor 1	ETF1	A_21_P0013769	-0.848285	6.28389e-05				fibroblast growth factor binding protein 1	FGFBP1	A_23_P30126	-0.823978	2.64702e-07				phosphodiesterase 9A	PDE9A	A_23_P29096	-0.825287	3.47245e-05				AP2 associated kinase 1	AAK1	A_33_P3210585	-1.226	2.66004e-07				nuclear receptor interacting protein 3	NRIP3	A_23_P47682	-1.22717	1.71074e-07				procollagen-lysine, 2-oxoglutarate 5-dioxygenase 1	PLOD1	A_23_P137532	-1.25342	0.00010117
		lymphocyte antigen 6 complex, locus E	LY6E	A_24_P317762	-0.845652	0.000331864				uncharacterized LOC100506561	LOC100506561	A_21_P0014376	-0.820437	2.03024e-05				EF-hand domain family, member D1	EFHD1	A_33_P3418716	-0.825007	0.000138737				ybeY metallopeptidase (putative)	YBEY	A_32_P18547	-1.22018	3.39688e-09				NADH dehydrogenase (ubiquinone) 1 alpha subcomplex, 13	NDUFA13	A_23_P119627	-1.22439	2.09398e-08				ybeY metallopeptidase (putative)	YBEY	A_32_P18547	-1.24258	2.68713e-09
		six transmembrane epithelial antigen of the prostate 1	STEAP1	A_24_P406334	-0.842269	0.00033981				chromobox homolog 5	CBX5	A_23_P2355	-0.813679	9.71854e-05				vacuolar protein sorting 26 homolog A (S. pombe)	VPS26A	A_23_P75255	-0.824107	4.62352e-05				TAR (HIV-1) RNA binding protein 1	TARBP1	A_23_P52058	-1.216	2.19871e-06				HIV-1 Tat interactive protein 2, 30kDa	HTATIP2	A_24_P307580	-1.21832	7.91249e-08				COMM domain containing 4	COMMD4	A_24_P93371	-1.24096	2.73903e-09
		magnesium transporter 1	MAGT1	A_33_P3240912	-0.841099	2.4788e-07				general transcription factor IIF, polypeptide 1, 74kDa	GTF2F1	A_23_P16143	-0.8124	0.000208443				ATP synthase, H+ transporting, mitochondrial F1 complex, delta subunit	ATP5D	A_23_P5089	-0.81918	2.75335e-05				homeobox containing 1	HMBOX1	A_23_P134684	-1.21541	7.59093e-07				ZW10 interactor	ZWINT	A_23_P63789	-1.21671	2.83899e-08				mitochondrial intermediate peptidase	MIPEP	A_23_P117274	-1.24029	5.35269e-07
		general transcription factor IIE, polypeptide 2, beta 34kDa	GTF2E2	A_23_P94118	-0.835314	0.00146588						A_32_P113154	-0.810454	0.0112528				chromosome 9 open reading frame 43	C9orf43	A_23_P320862	-0.816537	2.70885e-06				ybeY metallopeptidase (putative)	YBEY	A_33_P3406004	-1.21064	8.83997e-09				aspartyl-tRNA synthetase	DARS	A_33_P3531857	-1.2147	7.86656e-08				erythrocyte membrane protein band 4.1-like 1	EPB41L1	A_23_P154806	-1.23978	1.08279e-07
		F-box and WD repeat domain containing 10	FBXW10	A_23_P218358	-0.8343	0.000142402				six transmembrane epithelial antigen of the prostate 1	STEAP1	A_24_P406334	-0.809933	0.000478175				UBX domain protein 1	UBXN1	A_23_P98605	-0.816333	3.04282e-06				cleavage stimulation factor, 3' pre-RNA, subunit 3, 77kDa	CSTF3	A_23_P98310	-1.20868	3.2805e-05					SDIM1	A_21_P0014941	-1.21067	1.81686e-05				inverted formin, FH2 and WH2 domain containing	INF2	A_23_P394836	-1.237	2.52698e-07
				A_32_P31992	-0.83229	2.19594e-07				SGT1, suppressor of G2 allele of SKP1 (S. cerevisiae)	SUGT1	A_24_P280706	-0.809705	3.05046e-07				uncharacterized LOC402483	FLJ45340	A_32_P41375	-0.810583	0.000391842					XLOC_l2_009442	A_21_P0012331	-1.20604	2.37891e-05				proteolipid protein 2 (colonic epithelium-enriched)	PLP2	A_24_P74932	-1.1981	5.62686e-08				chromosome 14 open reading frame 126	C14orf126	A_23_P37144	-1.23493	2.01387e-07
		cerebral endothelial cell adhesion molecule	CERCAM	A_33_P3671378	-0.828441	0.00023074				UBX domain protein 1	UBXN1	A_23_P98605	-0.805958	3.5137e-06				cleavage stimulation factor, 3' pre-RNA, subunit 3, 77kDa	CSTF3	A_24_P256552	-0.807715	4.08867e-05				COMM domain containing 4	COMMD4	A_24_P93371	-1.19616	4.39561e-09				ybeY metallopeptidase (putative)	YBEY	A_33_P3406004	-1.19535	1.03897e-08				G protein-coupled receptor kinase 5	GRK5	A_23_P12884	-1.22859	9.81787e-08
		natural killer-tumor recognition sequence	NKTR	A_24_P926760	-0.827401	4.3601e-05				ATP synthase, H+ transporting, mitochondrial F1 complex, delta subunit	ATP5D	A_23_P5089	-0.80322	3.37088e-05				proteasome (prosome, macropain) 26S subunit, ATPase, 4	PSMC4	A_24_P91310	-0.807407	0.000111464				erythrocyte membrane protein band 4.1-like 1	EPB41L1	A_23_P154806	-1.19554	1.68643e-07				deoxyhypusine synthase	DHPS	A_23_P501887	-1.19518	2.87616e-08				ZW10 interactor	ZWINT	A_23_P63789	-1.22564	2.59046e-08
		nuclear transcription factor Y, alpha	NFYA	A_24_P414719	-0.821402	1.61067e-05				general transcription factor IIE, polypeptide 2, beta 34kDa	GTF2E2	A_23_P94118	-0.798974	0.00205315				Rho guanine nucleotide exchange factor (GEF) 1	ARHGEF1	A_24_P202581	-0.805668	2.12201e-05				RAN binding protein 9	RANBP9	A_24_P226355	-1.19446	1.81519e-06				solute carrier family 37 (glycerol-3-phosphate transporter), member 1	SLC37A1	A_23_P17695	-1.19266	7.95686e-06				four jointed box 1 (Drosophila)	FJX1	A_23_P150693	-1.22551	3.07541e-09
		chromosome 5 open reading frame 13	C5orf13	A_24_P149124	-0.821377	4.36594e-05				differentially expressed in FDCP 8 homolog (mouse)	DEF8	A_24_P193582	-0.797313	4.66467e-06				tet methylcytosine dioxygenase 1	TET1	A_19_P00806490	-0.804734	3.38714e-05				proteolipid protein 2 (colonic epithelium-enriched)	PLP2	A_24_P74932	-1.19036	6.09688e-08				family with sequence similarity 83, member H	FAM83H	A_23_P421175	-1.19185	8.40422e-08				AP2 associated kinase 1	AAK1	A_33_P3210585	-1.21433	2.98387e-07
				A_24_P255314	-0.8206	0.00155061				CTD (carboxy-terminal domain, RNA polymerase II, polypeptide A) small phosphatase 2	CTDSP2	A_33_P3267280	-0.791621	1.87783e-05				ARP3 actin-related protein 3 homolog C (yeast)	ACTR3C	A_33_P3264089	-0.802228	2.64298e-05				DEAD (Asp-Glu-Ala-Asp) box polypeptide 17	DDX17	A_23_P57534	-1.17419	9.28831e-08				cofilin 1 (non-muscle)	CFL1	A_32_P148710	-1.18911	3.16415e-08				septin 2	SEPT2	A_24_P43092	-1.19372	9.61378e-09
		SERTA domain containing 4	SERTAD4	A_23_P318904	-0.819701	7.83285e-05				chromosome 10 open reading frame 140	C10orf140	A_32_P152767	-0.791509	1.21268e-06				homeobox containing 1	HMBOX1	A_23_P134684	-0.794259	7.63408e-05				uncharacterized LOC145820	LOC145820	A_33_P3490794	-1.17201	4.76599e-08				neurofibromin 1	NF1	A_21_P0011345	-1.1846	7.57758e-07				ATP synthase, H+ transporting, mitochondrial F1 complex, delta subunit	ATP5D	A_23_P5089	-1.18847	4.30533e-07
		adaptor-related protein complex 1, sigma 1 subunit	AP1S1	A_23_P157404	-0.817498	0.00214557				proteasome (prosome, macropain) 26S subunit, ATPase, 4	PSMC4	A_24_P91310	-0.785668	0.000144425				zinc finger and SCAN domain containing 20	ZSCAN20	A_33_P3407384	-0.791744	5.51527e-05				ZW10 interactor	ZWINT	A_23_P63789	-1.17184	4.53727e-08					XLOC_l2_009442	A_21_P0012331	-1.1828	2.91012e-05						A_24_P213228	-1.18784	1.74454e-06
		exocyst complex component 3-like 4	EXOC3L4	A_33_P3360972	-0.81358	0.000564068				methyltransferase like 5	METTL5	A_33_P3272461	-0.775877	7.00955e-07				STEAP family member 1B	STEAP1B	A_21_P0000044	-0.790677	0.00012187				zinc and ring finger 3	ZNRF3	A_23_P427502	-1.17084	4.11055e-05				basic, immunoglobulin-like variable motif containing	BIVM	A_23_P105833	-1.17893	3.45335e-08				lin-37 homolog (C. elegans)	LIN37	A_23_P165186	-1.18321	2.94761e-06
		vacuolar protein sorting 26 homolog A (S. pombe)	VPS26A	A_23_P75255	-0.811214	5.41544e-05				uncharacterized LOC152742	LOC152742	A_19_P00808586	-0.775212	0.000128817				dedicator of cytokinesis 10	DOCK10	A_23_P16722	-0.789675	1.20361e-06				procollagen-lysine, 2-oxoglutarate 5-dioxygenase 1	PLOD1	A_23_P137532	-1.17027	0.000193252				DEAD (Asp-Glu-Ala-Asp) box polypeptide 17	DDX17	A_23_P57534	-1.1779	8.93575e-08				erythrocyte membrane protein band 4.1 like 5	EPB41L5	A_33_P3248325	-1.17337	4.21637e-06
		integrator complex subunit 4	INTS4	A_21_P0013386	-0.809996	0.000465581				biorientation of chromosomes in cell division 1-like	BOD1L	A_24_P231057	-0.774934	0.000926275				myosin, light chain 5, regulatory	MYL5	A_23_P258018	-0.788813	6.43599e-07				cerebellar degeneration-related protein 2, 62kDa	CDR2	A_24_P339071	-1.16842	6.62436e-09				COMM domain containing 4	COMMD4	A_24_P93371	-1.16792	5.96901e-09				eukaryotic translation initiation factor 2B, subunit 4 delta, 67kDa	EIF2B4	A_23_P154058	-1.17206	1.6324e-05
		UBX domain protein 1	UBXN1	A_23_P98605	-0.806652	3.47992e-06				calcium/calmodulin-dependent protein kinase I	CAMK1	A_23_P121215	-0.769363	0.000353732				intracisternal A particle-promoted polypeptide	IPP	A_23_P9662	-0.788587	4.56126e-06				SH3-domain binding protein 4	SH3BP4	A_23_P79259	-1.16814	3.5069e-07				mitochondrial ribosomal protein L37	MRPL37	A_33_P3297921	-1.1657	3.05974e-05				RNA binding protein, autoantigenic (hnRNP-associated with lethal yellow homolog (mouse))	RALY	A_23_P109235	-1.16887	1.34236e-06
				A_32_P113154	-0.802143	0.0119362				small Cajal body-specific RNA 15	SCARNA15	A_21_P0008664	-0.764432	9.1347e-05				POTE ankyrin domain family, member B	POTEB	A_32_P16007	-0.785885	0.000753085				cysteine-serine-rich nuclear protein 1	CSRNP1	A_23_P121011	-1.16522	1.5831e-07				uracil phosphoribosyltransferase (FUR1) homolog (S. cerevisiae)	UPRT	A_24_P185986	-1.16435	5.59792e-07				syntaxin 8	STX8	A_23_P146908	-1.16449	4.66173e-09
		cofilin 1 (non-muscle)	CFL1	A_32_P148710	-0.801947	3.46827e-06				STEAP family member 1B	STEAP1B	A_21_P0000044	-0.763624	0.00016914				succinate dehydrogenase complex, subunit A, flavoprotein (Fp)	SDHA	A_32_P67259	-0.785473	0.00031535				basic, immunoglobulin-like variable motif containing	BIVM	A_23_P105833	-1.16379	4.0571e-08						A_33_P3347055	-1.15254	0.000728318				Shwachman-Bodian-Diamond syndrome	SBDS	A_33_P3238866	-1.16388	0.000113777
		proteasome (prosome, macropain) 26S subunit, ATPase, 4	PSMC4	A_24_P91310	-0.800351	0.000121205				EF-hand domain family, member D1	EFHD1	A_23_P154338	-0.762286	0.00437645						A_24_P50437	-0.784258	0.00078354				phenylalanyl-tRNA synthetase, beta subunit	FARSB	A_23_P165355	-1.16076	6.42684e-07				BCL2-associated athanogene 3	BAG3	A_23_P47077	-1.14842	6.98793e-07				cerebellar degeneration-related protein 2, 62kDa	CDR2	A_24_P339071	-1.16174	7.12733e-09
		SPRY domain containing 3	SPRYD3	A_23_P65129	-0.798702	0.000346734				EMG1 nucleolar protein homolog (S. cerevisiae)	EMG1	A_24_P253215	-0.761235	1.4906e-05				differentially expressed in FDCP 8 homolog (mouse)	DEF8	A_24_P193582	-0.782876	5.71105e-06				spindlin 1	SPIN1	A_24_P72750	-1.15818	1.61617e-07				chromosome 4 open reading frame 29	C4orf29	A_23_P167358	-1.14809	1.36922e-05				cleavage stimulation factor, 3' pre-RNA, subunit 3, 77kDa	CSTF3	A_23_P98310	-1.15723	5.09766e-05
		Rab9 effector protein with kelch motifs	RABEPK	A_33_P3278220	-0.797342	0.00203716				zinc finger CCCH-type, antiviral 1	ZC3HAV1	A_33_P3397418	-0.757579	4.75128e-05					XLOC_005918	A_21_P0005182	-0.781029	0.000326439				mitochondrial ribosomal protein L37	MRPL37	A_33_P3297921	-1.15677	3.31106e-05				heterogeneous nuclear ribonucleoprotein L-like	HNRPLL	A_33_P3371910	-1.14772	1.60652e-06				zinc and ring finger 3	ZNRF3	A_23_P427502	-1.157	4.63486e-05
		uncharacterized LOC100507150	LOC100507150	A_21_P0003445	-0.793735	9.88676e-05				NIMA (never in mitosis gene a)-related kinase 1	NEK1	A_23_P124427	-0.757429	0.000244554				zinc finger CCCH-type, antiviral 1	ZC3HAV1	A_33_P3397418	-0.780433	3.51566e-05				cytidine monophosphate (UMP-CMP) kinase 1, cytosolic	CMPK1	A_33_P3317988	-1.15014	3.07807e-06				uncharacterized LOC440288	LOC440288	A_21_P0000808	-1.14234	6.33762e-08				HIV-1 Tat interactive protein 2, 30kDa	HTATIP2	A_24_P307580	-1.15624	1.50096e-07
		selenoprotein K	SELK	A_23_P364517	-0.793364	2.31193e-05				prolyl 4-hydroxylase, alpha polypeptide II	P4HA2	A_23_P30363	-0.755537	5.35979e-06				chromosome 2 open reading frame 68	C2orf68	A_32_P36046	-0.779389	0.000559509				cullin 2	CUL2	A_24_P252794	-1.14853	0.00012374				zinc finger, CCHC domain containing 4	ZCCHC4	A_24_P248863	-1.14025	1.90941e-06				spindlin 1	SPIN1	A_24_P72750	-1.14971	1.76688e-07
		prolyl endopeptidase	PREP	A_33_P3230976	-0.791049	7.12221e-05				dynein, cytoplasmic 1, light intermediate chain 2	DYNC1LI2	A_33_P3374758	-0.752397	0.00271892				uncharacterized LOC100128239	LOC100128239	A_33_P3394978	-0.77902	0.000663237				EF-hand domain family, member D1	EFHD1	A_33_P3418716	-1.14754	4.60241e-06				importin 7	IPO7	A_32_P186226	-1.13643	3.10934e-05				protein kinase C substrate 80K-H	PRKCSH	A_24_P396197	-1.13911	2.05496e-05
		nucleobindin 1	NUCB1	A_23_P78771	-0.790779	0.000166236				selenoprotein T	SELT	A_33_P3305851	-0.752295	0.000476463				Werner helicase interacting protein 1	WRNIP1	A_24_P192197	-0.777712	8.44389e-06				long intergenic non-protein coding RNA 478	LINC00478	A_33_P3312384	-1.14198	5.15445e-06				ribosomal protein S3A	RPS3A	A_24_P383999	-1.13304	2.6054e-06				chromosome 12 open reading frame 43	C12orf43	A_23_P151179	-1.13651	1.0371e-07
		SGT1, suppressor of G2 allele of SKP1 (S. cerevisiae)	SUGT1	A_24_P280706	-0.789817	4.1063e-07						A_33_P3221980	-0.752239	6.99135e-05				ATP synthase, H+ transporting, mitochondrial Fo complex, subunit B1	ATP5F1	A_23_P46275	-0.7722	0.000156217				prolyl endopeptidase	PREP	A_33_P3230976	-1.1395	1.41275e-06				KIAA1217	KIAA1217	A_33_P3233580	-1.13036	3.97715e-06				tryptophanyl tRNA synthetase 2, mitochondrial	WARS2	A_33_P3338417	-1.13355	7.43615e-08
		calcium/calmodulin-dependent protein kinase I	CAMK1	A_23_P121215	-0.789479	0.000281139				ribosomal protein S3A	RPS3A	A_32_P135818	-0.750608	0.000191732				nucleotide-binding oligomerization domain containing 1	NOD1	A_24_P129277	-0.769823	4.57826e-05				heat shock protein 90kDa alpha (cytosolic), class B member 2, pseudogene	HSP90AB2P	A_33_P3324890	-1.13523	1.24962e-05						A_24_P375849	-1.12801	1.42447e-06				chromosome 1 open reading frame 52	C1orf52	A_33_P3300273	-1.13147	1.08567e-08
		PHD finger protein 11	PHF11	A_23_P65174	-0.786463	7.16691e-05				ATP synthase, H+ transporting, mitochondrial Fo complex, subunit B1	ATP5F1	A_23_P46275	-0.749168	0.000206858					XLOC_l2_001134	A_21_P0010778	-0.768778	0.000295155				stress-induced-phosphoprotein 1	STIP1	A_32_P92783	-1.12606	1.42492e-05				ATP synthase, H+ transporting, mitochondrial F1 complex, delta subunit	ATP5D	A_23_P5089	-1.12627	8.12228e-07				coiled-coil domain containing 22	CCDC22	A_23_P114144	-1.13018	4.86684e-06
				A_33_P3397298	-0.785314	0.000113				COBW domain containing 5	CBWD5	A_24_P25080	-0.74897	0.000517876				RAB37, member RAS oncogene family	RAB37	A_33_P3314594	-0.767283	1.31497e-05				cleavage stimulation factor, 3' pre-RNA, subunit 3, 77kDa	CSTF3	A_24_P256552	-1.12478	1.09829e-06				HIRA interacting protein 3	HIRIP3	A_24_P142269	-1.12289	4.74852e-06				exocyst complex component 3-like 4	EXOC3L4	A_33_P3360972	-1.12906	2.53866e-05
		inositol-tetrakisphosphate 1-kinase	ITPK1	A_24_P167683	-0.784965	4.80427e-05				lymphocyte antigen 6 complex, locus E	LY6E	A_24_P317762	-0.747978	0.000939474						A_33_P3308115	-0.764571	1.94881e-05				importin 7	IPO7	A_32_P186226	-1.12274	3.52023e-05				four jointed box 1 (Drosophila)	FJX1	A_23_P150693	-1.11961	9.77682e-09				UDP-N-acetyl-alpha-D-galactosamine:polypeptide N-acetylgalactosaminyltransferase 11 (GalNAc-T11)	GALNT11	A_23_P8416	-1.12784	5.80621e-07
		Ras suppressor protein 1	RSU1	A_23_P149813	-0.780125	5.15434e-06						A_33_P3376925	-0.744869	0.000110774				angiopoietin-like 2	ANGPTL2	A_33_P3844650	-0.763949	0.000359511				uracil phosphoribosyltransferase (FUR1) homolog (S. cerevisiae)	UPRT	A_24_P185986	-1.11835	8.99111e-07				oligonucleotide/oligosaccharide-binding fold containing 1	OBFC1	A_23_P46852	-1.11898	9.05443e-09				ornithine decarboxylase 1	ODC1	A_23_P165840	-1.116	6.14832e-07
		chromosome 10 open reading frame 140	C10orf140	A_32_P152767	-0.778972	1.45852e-06				cytochrome b5 type A (microsomal)	CYB5A	A_33_P3311076	-0.743676	1.56087e-05						A_32_P514599	-0.763732	0.000639953				protein kinase domain containing, cytoplasmic homolog (mouse)	PKDCC	A_32_P112493	-1.11795	0.000108187				general transcription factor IIA, 1, 19/37kDa	GTF2A1	A_23_P65609	-1.11863	2.25307e-05				neurofibromin 1	NF1	A_21_P0011345	-1.11373	1.5522e-06
				A_23_P25069	-0.777799	0.000444472				mitochondrial intermediate peptidase	MIPEP	A_23_P117274	-0.742909	0.000132758				cancer/testis antigen family 45, member A1	CT45A1	A_32_P780817	-0.762938	1.6247e-06				lin-37 homolog (C. elegans)	LIN37	A_23_P165186	-1.11201	5.89099e-06				succinate dehydrogenase complex, subunit A, flavoprotein (Fp)	SDHA	A_33_P3399492	-1.11641	7.94218e-06				5', 3'-nucleotidase, cytosolic	NT5C	A_33_P3229256	-1.11258	3.64065e-09
		ring finger protein 112	RNF112	A_23_P107116	-0.774693	9.11362e-05				surfeit 2	SURF2	A_23_P146479	-0.742787	0.00031718				prolyl 4-hydroxylase, alpha polypeptide II	P4HA2	A_23_P30363	-0.75946	5.06116e-06				WD repeat domain 78	WDR78	A_33_P3379381	-1.10447	4.75552e-06				nuclear receptor interacting protein 3	NRIP3	A_33_P3244956	-1.11374	1.28783e-06				Werner helicase interacting protein 1	WRNIP1	A_24_P192197	-1.11243	1.33398e-07
		tropomyosin 1 (alpha)	TPM1	A_24_P44462	-0.773274	1.30113e-06					LOC100507239	A_21_P0014119	-0.742696	2.5149e-05				mitochondrial ribosomal protein L37	MRPL37	A_33_P3297921	-0.756732	0.00151855				deoxyhypusine synthase	DHPS	A_23_P501887	-1.10412	7.69785e-08				vacuolar protein sorting 26 homolog A (S. pombe)	VPS26A	A_23_P75255	-1.11277	1.8039e-06				LY6/PLAUR domain containing 6	LYPD6	A_24_P37253	-1.10655	1.25101e-07
		leucine carboxyl methyltransferase 1	LCMT1	A_23_P112825	-0.77214	2.24507e-05				differentially expressed in FDCP 8 homolog (mouse)	DEF8	A_23_P88893	-0.741481	1.23294e-06				S-phase kinase-associated protein 2 (p45)	SKP2	A_23_P156310	-0.756614	1.92054e-06				fucosyltransferase 11 (alpha (1,3) fucosyltransferase)	FUT11	A_23_P413788	-1.10192	4.81647e-08				inverted formin, FH2 and WH2 domain containing	INF2	A_23_P394836	-1.11253	8.89666e-07				chromosome 4 open reading frame 47	C4orf47	A_33_P3247175	-1.1054	1.19001e-05
		ATP synthase, H+ transporting, mitochondrial Fo complex, subunit B1	ATP5F1	A_23_P46275	-0.769325	0.000161762				KDEL (Lys-Asp-Glu-Leu) containing 1	KDELC1	A_23_P128613	-0.738732	0.000802746				DEAD (Asp-Glu-Ala-Asp) box polypeptide 17	DDX17	A_23_P57534	-0.756404	1.48087e-05				eukaryotic translation initiation factor 2B, subunit 4 delta, 67kDa	EIF2B4	A_23_P154058	-1.10095	3.13555e-05				ras homolog gene family, member B	RHOB	A_33_P3308446	-1.11211	2.53141e-06				phosphodiesterase 9A	PDE9A	A_23_P29096	-1.10071	1.50286e-06
		nudix (nucleoside diphosphate linked moiety X)-type motif 7	NUDT7	A_23_P3602	-0.768367	5.59859e-06				succinate dehydrogenase complex, subunit A, flavoprotein (Fp)	SDHA	A_32_P67259	-0.737404	0.000546366						A_33_P3252491	-0.7544	0.004589						A_33_P3221980	-1.0972	1.19647e-06				Y box binding protein 1	YBX1	A_24_P101391	-1.11137	0.000260402						A_32_P54475	-1.10009	1.36615e-05
		methyltransferase like 5	METTL5	A_33_P3272461	-0.766757	8.05325e-07				PHD finger protein 11	PHF11	A_23_P65174	-0.734064	0.000139248				adaptor-related protein complex 1, sigma 1 subunit	AP1S1	A_23_P157404	-0.746138	0.00409982				solute carrier family 37 (glycerol-3-phosphate transporter), member 1	SLC37A1	A_23_P17695	-1.09451	1.99425e-05				centrosome and spindle pole associated protein 1	CSPP1	A_23_P71537	-1.10879	1.82606e-06				uncharacterized LOC440288	LOC440288	A_21_P0000808	-1.09925	1.01741e-07
		heterogeneous nuclear ribonucleoprotein C (C1/C2)	HNRNPC	A_32_P142028	-0.765024	0.00195977				trafficking protein particle complex 2-like	TRAPPC2L	A_24_P327050	-0.732028	3.9736e-06					XLOC_l2_009442	A_21_P0012331	-0.745036	0.00184043				EF-hand domain family, member D1	EFHD1	A_23_P154338	-1.09147	0.000257099				5', 3'-nucleotidase, cytosolic	NT5C	A_33_P3229256	-1.10422	4.01128e-09				WD repeat domain 26	WDR26	A_23_P85604	-1.09459	1.9528e-05
		nucleotide-binding oligomerization domain containing 1	NOD1	A_24_P129277	-0.76264	5.03047e-05				natural killer-tumor recognition sequence	NKTR	A_24_P926760	-0.731759	0.000144617				small Cajal body-specific RNA 23	SCARNA23	A_33_P3737979	-0.743905	0.000499605				HIV-1 Tat interactive protein 2, 30kDa	HTATIP2	A_24_P307580	-1.09092	3.03081e-07				docking protein 4	DOK4	A_24_P48069	-1.10311	3.31627e-06				zinc finger, CCHC domain containing 4	ZCCHC4	A_24_P248863	-1.09111	3.14821e-06
			XLOC_l2_003293	A_21_P0011090	-0.761106	0.000164834				centrosome and spindle pole associated protein 1	CSPP1	A_23_P71537	-0.731317	0.000144498				CDK5 regulatory subunit associated protein 3	CDK5RAP3	A_24_P292964	-0.742492	0.000325226				ribosomal protein S3A	RPS3A	A_32_P58074	-1.08944	3.71304e-06				spindlin 1	SPIN1	A_24_P72750	-1.1023	2.93669e-07				pituitary tumor-transforming 1 interacting protein	PTTG1IP	A_24_P391260	-1.08608	4.23283e-05
		disabled homolog 2, mitogen-responsive phosphoprotein (Drosophila)	DAB2	A_33_P3338928	-0.760924	4.82588e-05				small nuclear ribonucleoprotein 35kDa (U11/U12)	SNRNP35	A_23_P159101	-0.731263	0.000439164						A_24_P76358	-0.739186	0.00121152				succinate dehydrogenase complex, subunit A, flavoprotein (Fp)	SDHA	A_33_P3399492	-1.08867	1.04336e-05						A_33_P3366224	-1.10204	4.07114e-06				long intergenic non-protein coding RNA 478	LINC00478	A_33_P3312384	-1.08472	9.05922e-06
		carboxypeptidase, vitellogenic-like	CPVL	A_23_P134347	-0.759719	2.62554e-05				keratin 83	KRT83	A_33_P3273552	-0.730881	8.88424e-05				TAR (HIV-1) RNA binding protein 1	TARBP1	A_23_P52058	-0.738391	0.00035606				four jointed box 1 (Drosophila)	FJX1	A_23_P150693	-1.08767	1.41101e-08						A_24_P7750	-1.1015	2.24792e-06				additional sex combs like 2 (Drosophila)	ASXL2	A_23_P210300	-1.08431	3.0116e-06
			XLOC_002996	A_21_P0003091	-0.759213	0.000299329				cleavage stimulation factor, 3' pre-RNA, subunit 3, 77kDa	CSTF3	A_24_P256552	-0.730812	0.000109661				uncharacterized LOC145820	LOC145820	A_33_P3490794	-0.737989	1.06e-05				reticulon 4 interacting protein 1	RTN4IP1	A_23_P122775	-1.07876	7.67515e-08				ribosomal protein S3A	RPS3A	A_32_P58074	-1.09781	3.40779e-06				stress-induced-phosphoprotein 1	STIP1	A_32_P92783	-1.07799	2.2568e-05
			LOC100507239	A_21_P0014119	-0.759156	2.0007e-05				tryptophan rich basic protein	WRB	A_23_P80122	-0.730147	0.0119126				uncharacterized LOC100507150	LOC100507150	A_21_P0003445	-0.737887	0.000196728				sirtuin 5	SIRT5	A_33_P3271755	-1.07168	4.91458e-05				G protein-coupled receptor kinase 5	GRK5	A_23_P12884	-1.09162	4.10106e-07				NADH dehydrogenase (ubiquinone) 1 alpha subcomplex, 13	NDUFA13	A_23_P119627	-1.0717	1.09462e-07
		KH domain containing, RNA binding, signal transduction associated 3	KHDRBS3	A_33_P3394727	-0.756862	0.00250431				chromosome 12 open reading frame 43	C12orf43	A_23_P151179	-0.730043	1.6789e-05				methyltransferase like 5	METTL5	A_33_P3272461	-0.736771	1.28155e-06				ribosomal protein S3A	RPS3A	A_24_P383999	-1.06989	4.95629e-06				TBP-like 1	TBPL1	A_33_P3380682	-1.08888	1.87591e-05				RAN binding protein 9	RANBP9	A_24_P226355	-1.06836	6.35441e-06
		mitotic spindle organizing protein 2A	MZT2A	A_23_P165676	-0.753214	0.000309805				calmodulin 2 (phosphorylase kinase, delta)	CALM2	A_33_P3212782	-0.726646	0.00581226				nucleolar protein 10	NOL10	A_24_P384755	-0.736097	0.000100003				cutC copper transporter homolog (E. coli)	CUTC	A_23_P98015	-1.06891	1.9e-05				far upstream element (FUSE) binding protein 1	FUBP1	A_33_P3281151	-1.08864	2.34187e-07				RAB, member of RAS oncogene family-like 2A	RABL2A	A_24_P911094	-1.06354	2.40379e-07
		calpain 5	CAPN5	A_33_P3393170	-0.752601	0.000297641				protein phosphatase 4, catalytic subunit	PPP4C	A_23_P100355	-0.721357	2.49335e-05				heat shock protein 90kDa alpha (cytosolic), class B member 2, pseudogene	HSP90AB2P	A_33_P3324890	-0.736094	0.000776923						A_24_P247074	-1.06835	4.80207e-05				erythrocyte membrane protein band 4.1 like 5	EPB41L5	A_33_P3248325	-1.08588	9.87572e-06				docking protein 4	DOK4	A_24_P48069	-1.06228	5.05298e-06
		calcium channel, voltage-dependent, alpha 2/delta subunit 3	CACNA2D3	A_33_P3373259	-0.752478	0.000100743				inositol-tetrakisphosphate 1-kinase	ITPK1	A_24_P167683	-0.719485	0.000112892				cofilin 1 (non-muscle)	CFL1	A_32_P148710	-0.736088	8.93473e-06				BCL2-associated athanogene 3	BAG3	A_23_P47077	-1.06706	1.64215e-06				phenylalanyl-tRNA synthetase, beta subunit	FARSB	A_23_P165355	-1.08418	1.42475e-06						A_33_P3366224	-1.06187	6.14477e-06
		eukaryotic elongation factor, selenocysteine-tRNA-specific	EEFSEC	A_23_P144202	-0.750416	0.00103501				aldehyde dehydrogenase 4 family, member A1	ALDH4A1	A_32_P192970	-0.718926	5.49565e-05				t-complex 1	TCP1	A_33_P3349947	-0.735717	0.000439073				neurofibromin 1	NF1	A_21_P0011345	-1.0655	2.57403e-06				cerebellar degeneration-related protein 2, 62kDa	CDR2	A_24_P339071	-1.08143	1.76833e-08				chromosome 14 open reading frame 21	C14orf21	A_23_P326844	-1.06172	8.07889e-08
		myosin, light chain 9, regulatory	MYL9	A_23_P210425	-0.749711	1.26591e-05					LOC100506325	A_21_P0014351	-0.718421	4.37409e-06					XLOC_l2_003293	A_21_P0011090	-0.734419	0.000229095				far upstream element (FUSE) binding protein 1	FUBP1	A_33_P3281151	-1.06447	3.0678e-07				cleavage stimulation factor, 3' pre-RNA, subunit 3, 77kDa	CSTF3	A_23_P98310	-1.0743	0.000105735				tubulin, beta class I	TUBB	A_23_P81912	-1.05701	5.71408e-08
				A_33_P3246863	-0.74914	3.26906e-05				Leo1, Paf1/RNA polymerase II complex component, homolog (S. cerevisiae)	LEO1	A_33_P3270109	-0.718359	0.000341594				protocadherin beta 2	PCDHB2	A_23_P213375	-0.733988	0.000133526				WD repeat domain 26	WDR26	A_23_P85604	-1.06376	2.63063e-05				SUB1 homolog (S. cerevisiae)	SUB1	A_24_P320328	-1.06716	0.000430211				dystrobrevin binding protein 1	DTNBP1	A_33_P3337242	-1.05451	1.08654e-05
		KDEL (Lys-Asp-Glu-Leu) containing 1	KDELC1	A_23_P128613	-0.748889	0.000717163				NADH dehydrogenase (ubiquinone) 1 alpha subcomplex, 13	NDUFA13	A_23_P119627	-0.717241	1.13627e-05				NAD synthetase 1	NADSYN1	A_23_P35848	-0.733937	0.00018986				MAX-like protein X	MLX	A_19_P00810045	-1.06344	6.87332e-07				additional sex combs like 2 (Drosophila)	ASXL2	A_23_P210300	-1.05651	4.03076e-06				nucleolar protein 10	NOL10	A_24_P384755	-1.0543	2.24949e-06
		chromobox homolog 5	CBX5	A_23_P2355	-0.748325	0.000213672					XLOC_l2_000636	A_21_P0010740	-0.716554	0.000310099				Rab9 effector protein with kelch motifs	RABEPK	A_33_P3278220	-0.731998	0.00375585				LY6/PLAUR domain containing 6	LYPD6	A_24_P37253	-1.05947	2.12145e-07				uncharacterized LOC254057	LOC254057	A_33_P3613516	-1.05494	2.11776e-06				gap junction protein, beta 3, 31kDa	GJB3	A_24_P379233	-1.05274	1.43314e-07
		family with sequence similarity 175, member A	FAM175A	A_23_P253464	-0.747796	2.82336e-06				NIF3 NGG1 interacting factor 3-like 1 (S. cerevisiae)	NIF3L1	A_33_P3255766	-0.715218	0.000519605				glucuronidase, beta pseudogene 1	GUSBP1	A_24_P332739	-0.731788	0.000705648				5', 3'-nucleotidase, cytosolic	NT5C	A_33_P3229256	-1.05648	7.06326e-09				RNA binding protein, autoantigenic (hnRNP-associated with lethal yellow homolog (mouse))	RALY	A_23_P109235	-1.03759	5.17224e-06				homeobox containing 1	HMBOX1	A_23_P134684	-1.05227	3.96245e-06
				A_33_P3334047	-0.747395	0.000557637				adaptor-related protein complex 1, sigma 1 subunit	AP1S1	A_23_P157404	-0.714475	0.00546957				tubulin, beta class I	TUBB	A_23_P81912	-0.728336	4.63808e-06				inverted formin, FH2 and WH2 domain containing	INF2	A_23_P394836	-1.05306	1.68134e-06				protein kinase domain containing, cytoplasmic homolog (mouse)	PKDCC	A_32_P112493	-1.03407	0.000224517				TMEM56-RWDD3 readthrough	TMEM56-RWDD3	A_21_P0000145	-1.0438	3.39321e-05
		BCL2-associated athanogene 3	BAG3	A_23_P47077	-0.746787	7.47796e-05				dolichol kinase	DOLK	A_23_P10870	-0.713058	8.58479e-06				gamma-aminobutyric acid (GABA) A receptor, epsilon	GABRE	A_23_P159775	-0.727834	0.0001914				zinc finger, CCHC domain containing 4	ZCCHC4	A_24_P248863	-1.05252	4.71015e-06				cytidine monophosphate (UMP-CMP) kinase 1, cytosolic	CMPK1	A_33_P3317988	-1.03182	1.02027e-05				HIRA interacting protein 3	HIRIP3	A_24_P142269	-1.03903	1.10969e-05
		multiple EGF-like-domains 8	MEGF8	A_33_P3715177	-0.745935	1.81241e-05				FtsJ homolog 3 (E. coli)	FTSJ3	A_23_P55091	-0.711579	0.000657732				potassium voltage-gated channel, KQT-like subfamily, member 2	KCNQ2	A_33_P3360758	-0.726269	9.19856e-05				DnaJ (Hsp40) homolog, subfamily A, member 1	DNAJA1	A_24_P9671	-1.05144	6.29716e-06				RAD23 homolog B (S. cerevisiae)	RAD23B	A_33_P3312039	-1.03094	9.4632e-05				tripartite motif containing 27	TRIM27	A_32_P137035	-1.03673	6.93671e-07
		dolichol kinase	DOLK	A_23_P10870	-0.74587	5.24079e-06				heterogeneous nuclear ribonucleoprotein C (C1/C2)	HNRNPC	A_32_P142028	-0.710989	0.00332796				Leo1, Paf1/RNA polymerase II complex component, homolog (S. cerevisiae)	LEO1	A_33_P3270109	-0.725803	0.000311726				SUB1 homolog (S. cerevisiae)	SUB1	A_24_P320328	-1.05071	0.000491936				CTD (carboxy-terminal domain, RNA polymerase II, polypeptide A) small phosphatase 2	CTDSP2	A_33_P3267280	-1.02741	1.03734e-06				SUMO1/sentrin specific peptidase 5	SENP5	A_32_P32653	-1.02988	3.07925e-07
		chromosome 14 open reading frame 126	C14orf126	A_23_P37144	-0.742482	5.79329e-05				tropomyosin 1 (alpha)	TPM1	A_24_P44462	-0.707617	3.57628e-06				tryptophanyl tRNA synthetase 2, mitochondrial	WARS2	A_33_P3338417	-0.724691	1.32453e-05				nuclear receptor interacting protein 3	NRIP3	A_23_P47682	-1.04555	1.14757e-06				TAR (HIV-1) RNA binding protein 1	TARBP1	A_23_P52058	-1.02679	1.4207e-05				SCAN domain containing 1	SCAND1	A_23_P6196	-1.02921	1.89472e-06
		S-phase kinase-associated protein 2 (p45)	SKP2	A_23_P156310	-0.741394	2.42111e-06				TPTE pseudogene	psiTPTE22	A_21_P0012240	-0.707484	0.00209329				basic, immunoglobulin-like variable motif containing	BIVM	A_23_P105833	-0.72424	1.04666e-05				general transcription factor IIIA	GTF3A	A_23_P25525	-1.04382	1.54935e-07				fucosyltransferase 11 (alpha (1,3) fucosyltransferase)	FUT11	A_23_P413788	-1.02542	1.16921e-07				KIAA1715	KIAA1715	A_32_P31771	-1.02732	3.81805e-06
				A_33_P3347055	-0.740844	0.015023				cathepsin L1 pseudogene 8	CTSL1P8	A_21_P0000597	-0.706614	0.00191059				NADH dehydrogenase (ubiquinone) 1 beta subcomplex, 9, 22kDa	NDUFB9	A_24_P154006	-0.724194	3.95127e-05				oligonucleotide/oligosaccharide-binding fold containing 1	OBFC1	A_23_P46852	-1.04139	2.24645e-08				chromosome 12 open reading frame 43	C12orf43	A_23_P151179	-1.02524	3.60987e-07				ATP-binding cassette, sub-family B (MDR/TAP), member 10	ABCB10	A_23_P201918	-1.02715	3.56516e-06
		inverted formin, FH2 and WH2 domain containing	INF2	A_23_P394836	-0.740346	7.29772e-05					SDIM1	A_21_P0014941	-0.706363	0.00232325				seizure threshold 2 homolog (mouse)	SZT2	A_33_P3373139	-0.722927	0.00185089				chromosome 9 open reading frame 43	C9orf43	A_23_P320862	-1.04136	1.54984e-07				heat shock protein 90kDa alpha (cytosolic), class B member 2, pseudogene	HSP90AB2P	A_33_P3324890	-1.02422	3.66369e-05				dolichol kinase	DOLK	A_23_P10870	-1.02673	1.25342e-07
				A_24_P383330	-0.736	7.18257e-05				cancer/testis antigen family 45, member A1	CT45A1	A_32_P780817	-0.703878	4.04944e-06				differentially expressed in FDCP 8 homolog (mouse)	DEF8	A_23_P88893	-0.719264	1.75081e-06				protein disulfide isomerase family A, member 5	PDIA5	A_23_P167040	-1.03686	6.41198e-08				opioid growth factor receptor-like 1	OGFRL1	A_23_P7791	-1.02336	2.0872e-06				DEAD (Asp-Glu-Ala-Asp) box polypeptide 10	DDX10	A_23_P32938	-1.02521	4.5084e-07
		cleavage stimulation factor, 3' pre-RNA, subunit 3, 77kDa	CSTF3	A_24_P256552	-0.735751	0.000102795				zinc finger, DHHC-type containing 17	ZDHHC17	A_24_P76995	-0.702633	0.000408623				uncharacterized LOC401320	LOC401320	A_19_P00318189	-0.717975	4.25036e-05				zinc finger, DHHC-type containing 17	ZDHHC17	A_24_P76995	-1.02668	9.88255e-06				chloride channel 2	CLCN2	A_21_P0000083	-1.02334	3.19824e-05				nucleoporin 37kDa	NUP37	A_23_P48099	-1.0233	5.37099e-07
		mitochondrial ribosomal protein L43	MRPL43	A_33_P3263824	-0.73548	1.39548e-05				calpain 5	CAPN5	A_33_P3393170	-0.701975	0.000546403				heat shock 70kDa protein 2	HSPA2	A_23_P88303	-0.717207	2.12069e-05				uncharacterized LOC440288	LOC440288	A_21_P0000808	-1.0259	2.35638e-07				arsA arsenite transporter, ATP-binding, homolog 1 (bacterial)	ASNA1	A_23_P27627	-1.01959	6.78383e-06				six transmembrane epithelial antigen of the prostate 1	STEAP1	A_24_P406334	-1.02292	5.4419e-05
		heat shock 70kDa protein 2	HSPA2	A_23_P88303	-0.733828	1.66652e-05				Werner helicase interacting protein 1	WRNIP1	A_24_P192197	-0.698485	2.64301e-05				F-box and WD repeat domain containing 10	FBXW10	A_23_P218358	-0.716234	0.000558879				G protein-coupled receptor kinase 5	GRK5	A_23_P12884	-1.02555	8.572e-07				tryptophanyl tRNA synthetase 2, mitochondrial	WARS2	A_33_P3338417	-1.01736	2.77474e-07				general transcription factor IIIA	GTF3A	A_23_P25525	-1.02249	1.99038e-07
		surfeit 2	SURF2	A_23_P146479	-0.733551	0.000354352				chromosome 4 open reading frame 27	C4orf27	A_24_P49371	-0.69659	0.00140005				G protein-coupled receptor 135	GPR135	A_23_P205575	-0.715608	0.00117744				family with sequence similarity 83, member H	FAM83H	A_23_P421175	-1.02554	5.16562e-07				LY6/PLAUR domain containing 6	LYPD6	A_24_P37253	-1.01729	3.45739e-07				succinate dehydrogenase complex, subunit A, flavoprotein (Fp)	SDHA	A_33_P3399492	-1.022	2.04331e-05
		family with sequence similarity 83, member H	FAM83H	A_23_P421175	-0.733004	2.21495e-05				ubiquinol-cytochrome c reductase binding protein pseudogene 1	UQCRBP1	A_19_P00811288	-0.696159	5.51905e-05					XLOC_l2_011987	A_21_P0012899	-0.715133	0.000889378				keratin 83	KRT83	A_33_P3273552	-1.02334	2.53335e-06				UBX domain protein 8	UBXN8	A_23_P157465	-1.0163	8.65885e-06				heat shock protein 90kDa alpha (cytosolic), class B member 1	HSP90AB1	A_23_P145089	-1.01888	1.03049e-06
		COBW domain containing 5	CBWD5	A_24_P25080	-0.732709	0.000623763					XLOC_005918	A_21_P0005182	-0.695309	0.000878019				endoplasmic reticulum aminopeptidase 2	ERAP2	A_23_P30243	-0.715095	3.34301e-05				ATP-binding cassette, sub-family B (MDR/TAP), member 10	ABCB10	A_23_P201918	-1.02261	3.74639e-06				reticulon 4 interacting protein 1	RTN4IP1	A_23_P122775	-1.01584	1.60141e-07				cleavage stimulation factor, 3' pre-RNA, subunit 3, 77kDa	CSTF3	A_24_P256552	-1.01547	3.53217e-06
		synaptotagmin-like 1	SYTL1	A_33_P3235322	-0.732515	5.73042e-05				Leo1, Paf1/RNA polymerase II complex component, homolog (S. cerevisiae)	LEO1	A_23_P314222	-0.694971	0.000191139				cytochrome b5 type A (microsomal)	CYB5A	A_33_P3311076	-0.714887	2.36344e-05				RNA binding protein, autoantigenic (hnRNP-associated with lethal yellow homolog (mouse))	RALY	A_23_P109235	-1.02202	6.11162e-06				SET domain containing 6	SETD6	A_33_P3315355	-1.01152	0.000166074				WD repeat domain 78	WDR78	A_33_P3379381	-1.01392	1.21001e-05
		oxysterol binding protein-like 10	OSBPL10	A_23_P147245	-0.731904	1.42121e-06				ribosomal protein S14	RPS14	A_23_P81492	-0.694388	8.18449e-05				chromosome 10 open reading frame 140	C10orf140	A_32_P152767	-0.71419	3.91071e-06					XLOC_011183	A_19_P00813085	-1.02072	9.12765e-07				ATP-binding cassette, sub-family B (MDR/TAP), member 10	ABCB10	A_23_P201918	-1.01087	4.26221e-06				transducin (beta)-like 1 X-linked receptor 1	TBL1XR1	A_33_P3348614	-1.01298	0.000309546
		STEAP family member 1B	STEAP1B	A_21_P0000044	-0.731805	0.000250056				cancer/testis antigen family 45, member A5	CT45A5	A_32_P170547	-0.69374	3.28104e-05					XLOC_002996	A_21_P0003091	-0.714006	0.000512051				chromosome 12 open reading frame 43	C12orf43	A_23_P151179	-1.02053	3.81386e-07				nuclear transcription factor, X-box binding 1	NFX1	A_23_P94683	-1.00877	2.79473e-07				transmembrane protein 17	TMEM17	A_32_P206949	-1.0111	9.37216e-07
		heat shock 27kDa protein 1	HSPB1	A_33_P3353242	-0.73088	6.03688e-05				S-phase kinase-associated protein 2 (p45)	SKP2	A_23_P156310	-0.693478	5.12364e-06					XLOC_l2_003293	A_21_P0011084	-0.713424	2.40084e-05				chloride channel 2	CLCN2	A_21_P0000083	-1.02043	3.29326e-05				dystrobrevin binding protein 1	DTNBP1	A_33_P3337242	-1.00762	1.76453e-05				family with sequence similarity 82, member A2	FAM82A2	A_33_P3375234	-1.0085	1.49627e-06
		POTE ankyrin domain family, member F	POTEF	A_24_P59220	-0.729678	0.00035163				leucine carboxyl methyltransferase 1	LCMT1	A_23_P112825	-0.693159	6.71569e-05				small Cajal body-specific RNA 15	SCARNA15	A_21_P0008664	-0.71052	0.000182697				nucleoporin 37kDa	NUP37	A_23_P48099	-1.01938	5.62055e-07				DEAD (Asp-Glu-Ala-Asp) box polypeptide 10	DDX10	A_23_P32938	-1.00168	5.9359e-07				zinc finger protein 76	ZNF76	A_23_P8139	-1.00692	3.45312e-05
		general transcription factor IIA, 1, 19/37kDa	GTF2A1	A_23_P65609	-0.727165	0.00119357				t-complex 1	TCP1	A_33_P3349947	-0.689744	0.000757968				deoxyguanosine kinase	DGUOK	A_24_P285623	-0.709725	0.000384828				small nuclear RNA activating complex, polypeptide 1, 43kDa	SNAPC1	A_33_P3316223	-1.01447	4.0628e-06				eukaryotic translation initiation factor 2B, subunit 4 delta, 67kDa	EIF2B4	A_23_P154058	-0.999929	8.2201e-05				nuclear transport factor 2-like	LOC128322	A_33_P3399718	-1.00631	1.10555e-07
		intracisternal A particle-promoted polypeptide	IPP	A_23_P9662	-0.726236	1.12324e-05				MAS-related GPR, member F	MRGPRF	A_23_P432573	-0.689216	2.03765e-05				POTE ankyrin domain family, member E	POTEE	A_24_P825874	-0.707671	0.000176096						A_24_P169843	-1.01366	0.000341674				protein disulfide isomerase family A, member 5	PDIA5	A_23_P167040	-0.996739	1.04213e-07				serine/threonine/tyrosine interacting-like 1	STYXL1	A_23_P111635	-1.00556	7.0287e-05
		MIRLET7B host gene (non-protein coding)	MIRLET7BHG	A_33_P3328360	-0.725489	3.14959e-05						A_33_P3238225	-0.688834	6.91339e-05				tropomyosin 1 (alpha)	TPM1	A_24_P44462	-0.707671	3.57324e-06				ribosomal protein S3A	RPS3A	A_32_P135818	-1.01287	9.3927e-06				general transcription factor IIIA	GTF3A	A_23_P25525	-0.994497	2.78172e-07				DnaJ (Hsp40) homolog, subfamily C, member 21	DNAJC21	A_33_P3310533	-1.00528	1.69925e-06
		homeobox containing 1	HMBOX1	A_23_P134684	-0.725364	0.000181308				DnaJ (Hsp40) homolog, subfamily A, member 1	DNAJA1	A_24_P9671	-0.688772	0.000417302				leucine carboxyl methyltransferase 1	LCMT1	A_23_P112825	-0.706913	5.52659e-05						A_24_P307384	-1.01252	2.57205e-05				SUMO1/sentrin specific peptidase 5	SENP5	A_32_P32653	-0.991988	4.81545e-07				nuclear receptor interacting protein 3	NRIP3	A_23_P47682	-1.00171	1.88032e-06
		differentially expressed in FDCP 8 homolog (mouse)	DEF8	A_24_P193582	-0.724677	1.32155e-05				CDK5 regulatory subunit associated protein 3	CDK5RAP3	A_24_P292964	-0.688186	0.000626936				heat shock protein 90kDa alpha (cytosolic), class A member 1	HSP90AA1	A_32_P199252	-0.704676	0.00233385				cytochrome b5 type A (microsomal)	CYB5A	A_33_P3311076	-1.00916	5.00287e-07				DnaJ (Hsp40) homolog, subfamily A, member 1	DNAJA1	A_24_P9671	-0.98944	1.21824e-05				nuclear transcription factor, X-box binding 1	NFX1	A_23_P94683	-1.00078	3.07455e-07
		UL16 binding protein 3	ULBP3	A_23_P134100	-0.721598	8.55111e-05						A_24_P383330	-0.687261	0.00013897				EMG1 nucleolar protein homolog (S. cerevisiae)	EMG1	A_24_P253215	-0.703375	3.39985e-05						A_33_P3240295	-1.00845	1.0331e-05						A_24_P247074	-0.98653	0.000105095				nuclear transport factor 2	NUTF2	A_23_P118038	-0.999849	9.10347e-08
		EMG1 nucleolar protein homolog (S. cerevisiae)	EMG1	A_24_P253215	-0.721256	2.62557e-05				FK506 binding protein 2, 13kDa	FKBP2	A_33_P3273020	-0.687005	1.44581e-05				actinin, alpha 1	ACTN1	A_23_P105957	-0.702848	0.0022005				additional sex combs like 2 (Drosophila)	ASXL2	A_23_P210300	-1.00636	6.90439e-06				small nuclear RNA activating complex, polypeptide 1, 43kDa	SNAPC1	A_33_P3316223	-0.984644	5.65907e-06				oligonucleotide/oligosaccharide-binding fold containing 1	OBFC1	A_23_P46852	-0.998355	3.80962e-08
			XLOC_011837	A_21_P0009119	-0.721123	0.00219843				uncharacterized LOC145820	LOC145820	A_33_P3490794	-0.685583	2.31443e-05				septin 6	SEPT6	A_23_P22614	-0.70261	0.000302255				ATP synthase, H+ transporting, mitochondrial Fo complex, subunit B1	ATP5F1	A_23_P46275	-0.99846	1.17358e-05				zinc and ring finger 3	ZNRF3	A_23_P427502	-0.982598	0.000222812				cyclin M3	CNNM3	A_33_P3255274	-0.996331	3.03046e-08
		biorientation of chromosomes in cell division 1-like	BOD1L	A_24_P231057	-0.720844	0.00163614				N-acetylglucosamine kinase	NAGK	A_23_P154208	-0.683515	3.80475e-05				coiled-coil and C2 domain containing 2A	CC2D2A	A_23_P413285	-0.699503	0.00289772				SET domain containing 6	SETD6	A_33_P3315355	-0.995893	0.000191886						A_24_P358131	-0.980633	0.000476367				stomatin (EPB72)-like 2	STOML2	A_24_P338145	-0.990474	4.69784e-05
		uncharacterized LOC254057	LOC254057	A_33_P3613516	-0.717347	0.000122406				polymerase (RNA) III (DNA directed) polypeptide B	POLR3B	A_24_P321626	-0.681559	9.10336e-05				glutaminase	GLS	A_23_P39766	-0.697974	0.00104298				tubulin, beta 4B class IVb	TUBB4B	A_23_P312863	-0.995608	1.76308e-07				MAX-like protein X	MLX	A_19_P00810045	-0.973894	1.90784e-06				coiled-coil domain containing 51	CCDC51	A_23_P69362	-0.990065	6.3908e-06
		ATP synthase, H+ transporting, mitochondrial F1 complex, delta subunit	ATP5D	A_23_P5089	-0.716289	0.000105063				transaldolase 1	TALDO1	A_32_P18258	-0.68121	0.00344113				family with sequence similarity 114, member A1	FAM114A1	A_23_P132915	-0.695963	3.47314e-05				opioid growth factor receptor-like 1	OGFRL1	A_23_P7791	-0.98841	3.09538e-06						A_24_P169843	-0.973213	0.000487253				transmembrane protein 184C	TMEM184C	A_23_P18739	-0.989679	8.19079e-07
		syntaxin binding protein 6 (amisyn)	STXBP6	A_24_P10214	-0.713668	7.68777e-06				nucleotide-binding oligomerization domain containing 1	NOD1	A_24_P129277	-0.679871	0.000153375				chromosome 12 open reading frame 43	C12orf43	A_23_P151179	-0.695574	2.78333e-05				ras homolog gene family, member B	RHOB	A_33_P3308446	-0.98077	1.01831e-05					LOC100507149	A_21_P0014843	-0.971035	0.000152992						A_24_P647682	-0.988448	5.90501e-06
		CDK5 regulatory subunit associated protein 3	CDK5RAP3	A_24_P292964	-0.712102	0.000468778				uncharacterized LOC100507150	LOC100507150	A_21_P0003445	-0.677328	0.000423574					XLOC_000350	A_21_P0001365	-0.695115	0.000875731						A_24_P358131	-0.976104	0.000495691						A_33_P3376925	-0.968897	7.42341e-06				CDC-like kinase 3	CLK3	A_32_P20691	-0.988336	3.34717e-06
		aldehyde dehydrogenase 4 family, member A1	ALDH4A1	A_32_P192970	-0.712005	6.05083e-05				nudix (nucleoside diphosphate linked moiety X)-type motif 7	NUDT7	A_23_P3602	-0.677175	2.17813e-05					LOC100507239	A_21_P0014119	-0.694852	4.96245e-05				six transmembrane epithelial antigen of the prostate 1	STEAP1	A_24_P406334	-0.974426	8.77891e-05				LSM6 homolog, U6 small nuclear RNA associated (S. cerevisiae)	LSM6	A_23_P259451	-0.966829	1.77575e-05				small nuclear RNA activating complex, polypeptide 1, 43kDa	SNAPC1	A_33_P3316223	-0.987416	5.48607e-06
		small nuclear ribonucleoprotein 35kDa (U11/U12)	SNRNP35	A_23_P159101	-0.711881	0.000553006				UBX domain protein 8	UBXN8	A_23_P157465	-0.677101	0.000463987				GRAM domain containing 4	GRAMD4	A_24_P23258	-0.693862	8.90846e-05				dystrobrevin binding protein 1	DTNBP1	A_33_P3337242	-0.974396	2.50618e-05				inositol-tetrakisphosphate 1-kinase	ITPK1	A_24_P167683	-0.965888	5.36207e-06				CDK5 regulatory subunit associated protein 3	CDK5RAP3	A_24_P292964	-0.984789	2.10114e-05
		ankyrin repeat and sterile alpha motif domain containing 1A	ANKS1A	A_33_P3315510	-0.710307	0.00101511						A_33_P3308115	-0.677046	6.7257e-05					XLOC_l2_009273	A_21_P0012208	-0.693554	0.00617911				HIRA interacting protein 3	HIRIP3	A_24_P142269	-0.973944	2.20337e-05				tryptophan rich basic protein	WRB	A_23_P80122	-0.965457	0.0018912				opioid growth factor receptor-like 1	OGFRL1	A_23_P7791	-0.982901	3.29639e-06
		t-complex 1	TCP1	A_33_P3349947	-0.709833	0.000596444						A_33_P3351097	-0.676119	0.000300778					LOC100506325	A_21_P0014351	-0.691575	6.66461e-06				chromosome 1 open reading frame 52	C1orf52	A_33_P3300273	-0.970425	7.4198e-08				ATP synthase, H+ transporting, mitochondrial Fo complex, subunit B1	ATP5F1	A_23_P46275	-0.964662	1.6936e-05				myosin, light chain 9, regulatory	MYL9	A_23_P210425	-0.981883	6.03304e-07
		RAS (RAD and GEM)-like GTP binding 2	REM2	A_33_P3305487	-0.709279	0.000888094				H3 histone, family 3B (H3.3B)	H3F3B	A_33_P3410194	-0.675359	5.59558e-05				apolipoprotein L, 4	APOL4	A_23_P380857	-0.68956	0.00100045				CTD (carboxy-terminal domain, RNA polymerase II, polypeptide A) small phosphatase 2	CTDSP2	A_33_P3267280	-0.969678	2.02088e-06				coiled-coil domain containing 53	CCDC53	A_23_P53567	-0.962153	3.71388e-07				chloride channel 2	CLCN2	A_21_P0000083	-0.978814	5.02215e-05
		ribosomal protein S3A	RPS3A	A_32_P135818	-0.708848	0.000322043				caveolin 2	CAV2	A_24_P925040	-0.674763	0.000630243				nudix (nucleoside diphosphate linked moiety X)-type motif 7	NUDT7	A_23_P3602	-0.689357	1.80643e-05				SUMO1/sentrin specific peptidase 5	SENP5	A_32_P32653	-0.965998	6.59107e-07				protein phosphatase 1, regulatory subunit 9A	PPP1R9A	A_33_P3286937	-0.958188	3.12151e-05				resistance to inhibitors of cholinesterase 8 homolog A (C. elegans)	RIC8A	A_24_P115971	-0.972684	2.63278e-06
		trafficking protein particle complex 2-like	TRAPPC2L	A_24_P327050	-0.708541	5.70797e-06				ATPase, H+ transporting, lysosomal 50/57kDa, V1 subunit H	ATP6V1H	A_24_P363679	-0.674704	8.90845e-05					XLOC_l2_000636	A_21_P0010740	-0.689262	0.000436266				KIAA1217	KIAA1217	A_33_P3233580	-0.964647	2.21063e-05				protein kinase C substrate 80K-H	PRKCSH	A_24_P396197	-0.957907	0.000116645				twinfilin, actin-binding protein, homolog 2 (Drosophila)	TWF2	A_23_P121265	-0.96631	1.65812e-06
		MAX-like protein X	MLX	A_19_P00810045	-0.708209	5.82839e-05				ribosomal protein L9	RPL9	A_23_P7066	-0.674556	0.000426602				pseudouridylate synthase 3	PUS3	A_23_P13073	-0.688499	1.25922e-05				docking protein 4	DOK4	A_24_P48069	-0.960532	1.50763e-05				adaptor-related protein complex 1, sigma 1 subunit	AP1S1	A_23_P157404	-0.956027	0.000622895				family with sequence similarity 190, member B	FAM190B	A_33_P3214314	-0.964627	8.88032e-07
		calmodulin 2 (phosphorylase kinase, delta)	CALM2	A_33_P3212782	-0.707111	0.00691161				elongation factor RNA polymerase II-like 3	ELL3	A_24_P47988	-0.674247	0.00011485						A_33_P3390086	-0.687306	0.000850625						A_33_P3386723	-0.957932	4.5519e-05					XLOC_l2_008203	A_21_P0011950	-0.955971	2.12104e-07				fucosyltransferase 11 (alpha (1,3) fucosyltransferase)	FUT11	A_23_P413788	-0.963445	2.49186e-07
		differentially expressed in FDCP 8 homolog (mouse)	DEF8	A_23_P88893	-0.706825	2.13735e-06				chromobox homolog 1	CBX1	A_24_P298174	-0.672116	0.00671361				zinc finger, MYND-type containing 11	ZMYND11	A_23_P75083	-0.687303	0.00154699					LOC100507149	A_21_P0014843	-0.957126	0.000175045				family with sequence similarity 190, member B	FAM190B	A_33_P3214314	-0.955893	9.87481e-07				protein disulfide isomerase family A, member 5	PDIA5	A_23_P167040	-0.96224	1.60187e-07
		RAN binding protein 1 pseudogene	LOC727803	A_21_P0014871	-0.705848	0.0420567				deoxyguanosine kinase	DGUOK	A_24_P285623	-0.671827	0.000616508				neuroblastoma breakpoint family, member 6	NBPF6	A_33_P3279158	-0.687001	0.000404135				RAD23 homolog B (S. cerevisiae)	RAD23B	A_33_P3312039	-0.957051	0.000191146						A_33_P3240295	-0.95347	1.87754e-05				EF-hand domain family, member D1	EFHD1	A_33_P3418716	-0.9617	3.05576e-05
		far upstream element (FUSE) binding protein 1	FUBP1	A_23_P45699	-0.703115	0.000911433				mitochondrial ribosomal protein L43	MRPL43	A_33_P3263824	-0.671431	3.60964e-05				ubiquinol-cytochrome c reductase binding protein pseudogene 1	UQCRBP1	A_19_P00811288	-0.686703	6.32236e-05				trafficking protein particle complex 2-like	TRAPPC2L	A_24_P327050	-0.953814	1.80671e-07				chromosome 14 open reading frame 21	C14orf21	A_23_P326844	-0.952102	3.03843e-07				tripartite motif containing 27	TRIM27	A_24_P163405	-0.959203	2.18979e-05
		signal sequence receptor, alpha	SSR1	A_24_P544882	-0.702391	6.43217e-06				intracisternal A particle-promoted polypeptide	IPP	A_23_P9662	-0.670937	2.59268e-05				PDGFA associated protein 1	PDAP1	A_23_P123256	-0.685409	0.000145119				nuclear transcription factor, X-box binding 1	NFX1	A_23_P94683	-0.952353	5.5502e-07				sirtuin 5	SIRT5	A_33_P3271755	-0.951939	0.000155216				UBX domain protein 8	UBXN8	A_23_P157465	-0.958866	1.61633e-05
		CD19 molecule	CD19	A_23_P113572	-0.701916	0.000529197				feline leukemia virus subgroup C cellular receptor family, member 2	FLVCR2	A_23_P140373	-0.670648	0.000234651				F-box and leucine-rich repeat protein 8	FBXL8	A_33_P3284586	-0.685378	0.00054086				chromosome 14 open reading frame 21	C14orf21	A_23_P326844	-0.951943	3.04451e-07				stress-induced-phosphoprotein 1	STIP1	A_32_P92783	-0.950054	8.08648e-05				arsA arsenite transporter, ATP-binding, homolog 1 (bacterial)	ASNA1	A_23_P27627	-0.95861	1.32262e-05
		fucosyltransferase 10 (alpha (1,3) fucosyltransferase)	FUT10	A_33_P3748714	-0.701284	9.67032e-06				mitochondrial ribosomal protein S28	MRPS28	A_23_P169050	-0.66836	9.81999e-06				core-binding factor, runt domain, alpha subunit 2; translocated to, 2	CBFA2T2	A_33_P3265956	-0.684915	3.76058e-05				coiled-coil domain containing 53	CCDC53	A_23_P53567	-0.951247	4.25446e-07				cutC copper transporter homolog (E. coli)	CUTC	A_23_P98015	-0.948794	6.41519e-05					XLOC_011183	A_19_P00813085	-0.958197	1.89568e-06
		lon peptidase 1, mitochondrial	LONP1	A_33_P3312365	-0.701217	0.00159451				general transcription factor IIA, 1, 19/37kDa	GTF2A1	A_23_P65609	-0.668334	0.00226941				NADH dehydrogenase (ubiquinone) 1 alpha subcomplex, 13	NDUFA13	A_23_P119627	-0.684039	1.88101e-05				tripartite motif containing 27	TRIM27	A_32_P137035	-0.95032	1.90451e-06				prolyl endopeptidase	PREP	A_33_P3230976	-0.94805	1.10152e-05				kinesin family member 1C	KIF1C	A_33_P3230709	-0.95727	1.41857e-07
		killer cell lectin-like receptor subfamily G, member 1	KLRG1	A_23_P64898	-0.700612	1.68163e-05				protocadherin beta 2	PCDHB2	A_23_P213375	-0.66813	0.000316536				COBW domain containing 5	CBWD5	A_24_P25080	-0.683833	0.00109746				DEAD (Asp-Glu-Ala-Asp) box polypeptide 10	DDX10	A_23_P32938	-0.949026	1.11736e-06				phosphodiesterase 9A	PDE9A	A_23_P29096	-0.94595	8.21873e-06				leucyl/cystinyl aminopeptidase	LNPEP	A_23_P144677	-0.956541	3.88126e-05
		polymerase (RNA) III (DNA directed) polypeptide B	POLR3B	A_24_P321626	-0.700458	6.96912e-05				protein disulfide isomerase family A, member 5	PDIA5	A_23_P167040	-0.667442	1.08186e-05				uncharacterized LOC100130876	LOC100130876	A_33_P3247678	-0.68362	0.00367066				replication factor C (activator 1) 1, 145kDa	RFC1	A_23_P18465	-0.945831	1.48772e-05				transmembrane protein 17	TMEM17	A_32_P206949	-0.943337	2.08724e-06				family with sequence similarity 35, member A	FAM35A	A_33_P3357149	-0.956414	2.37696e-07
				A_24_P647682	-0.700335	0.000196104				basic transcription factor 3	BTF3	A_24_P183264	-0.66478	2.05108e-05				BCL2-associated athanogene 3	BAG3	A_23_P47077	-0.682107	0.00017756				UDP-N-acetyl-alpha-D-galactosamine:polypeptide N-acetylgalactosaminyltransferase 11 (GalNAc-T11)	GALNT11	A_23_P8416	-0.944698	4.44488e-06						A_33_P3386723	-0.942751	5.34322e-05				SET domain containing 6	SETD6	A_33_P3315355	-0.951199	0.000291326
		replication protein A1, 70kDa	RPA1	A_33_P3218951	-0.69976	0.000264828				RNA binding motif protein, X-linked	RBMX	A_32_P56392	-0.660853	3.04477e-05				coiled-coil domain containing 58	CCDC58	A_32_P215113	-0.68208	0.00487133				RNA binding motif protein, X-linked	RBMX	A_32_P56392	-0.944347	5.78488e-07				DiGeorge syndrome critical region gene 11	DGCR11	A_33_P3411357	-0.942338	7.49818e-07				signal recognition particle 19kDa	SRP19	A_24_P388810	-0.950216	1.86139e-05
		cullin 2	CUL2	A_24_P252794	-0.699049	0.00642316				kelch repeat and BTB (POZ) domain containing 4	KBTBD4	A_23_P202696	-0.660282	1.66068e-05				ribosomal protein S3A	RPS3A	A_32_P135818	-0.681494	0.000454654				arsA arsenite transporter, ATP-binding, homolog 1 (bacterial)	ASNA1	A_23_P27627	-0.938632	1.65448e-05				fragile X mental retardation, autosomal homolog 1	FXR1	A_33_P3387300	-0.942029	4.97812e-06				Y box binding protein 1	YBX1	A_24_P101391	-0.949563	0.000998111
				A_33_P3280549	-0.698178	0.0128902				ribosomal protein L13	RPL13	A_24_P142228	-0.66027	6.80091e-05				ring finger protein 207	RNF207	A_33_P3316978	-0.681259	0.000406499				UBX domain protein 8	UBXN8	A_23_P157465	-0.937488	2.04966e-05				tripartite motif containing 27	TRIM27	A_32_P137035	-0.941814	2.11051e-06				ras homolog gene family, member B	RHOB	A_33_P3308446	-0.946964	1.48278e-05
		tropomyosin 1 (alpha)	TPM1	A_33_P3335966	-0.695868	4.02426e-06				phosphatidylinositol glycan anchor biosynthesis, class L	PIGL	A_24_P253755	-0.659997	0.0002856				inositol-tetrakisphosphate 1-kinase	ITPK1	A_24_P167683	-0.679568	0.000193013				NIF3 NGG1 interacting factor 3-like 1 (S. cerevisiae)	NIF3L1	A_33_P3255766	-0.936547	4.17099e-05				chromosome 1 open reading frame 52	C1orf52	A_33_P3300273	-0.940682	1.0877e-07				calcium/calmodulin-dependent protein kinase kinase 2, beta	CAMKK2	A_23_P408830	-0.946872	1.45596e-07
		chromosome 12 open reading frame 43	C12orf43	A_23_P151179	-0.69395	2.85134e-05				inverted formin, FH2 and WH2 domain containing	INF2	A_23_P394836	-0.659053	0.000219939				disabled homolog 2, mitogen-responsive phosphoprotein (Drosophila)	DAB2	A_33_P3338928	-0.678016	0.000148198				fragile X mental retardation, autosomal homolog 1	FXR1	A_33_P3387300	-0.936332	5.32404e-06				differentially expressed in FDCP 8 homolog (mouse)	DEF8	A_23_P88893	-0.934825	7.69199e-08				sirtuin 5	SIRT5	A_33_P3271755	-0.945278	0.000165744
		neuroblastoma breakpoint family, member 6	NBPF6	A_33_P3279158	-0.692982	0.000374607				MAX-like protein X	MLX	A_19_P00810045	-0.658871	0.000117781				protein kinase domain containing, cytoplasmic homolog (mouse)	PKDCC	A_32_P112493	-0.676852	0.00607351						A_19_P00319050	-0.932869	9.53733e-06				SCAN domain containing 1	SCAND1	A_23_P6196	-0.930064	5.9137e-06				ATP synthase, H+ transporting, mitochondrial Fo complex, subunit B1	ATP5F1	A_23_P46275	-0.942214	2.16912e-05
		neurofibromin 1	NF1	A_21_P0011345	-0.692553	0.000218898				NADH dehydrogenase (ubiquinone) 1 beta subcomplex, 9, 22kDa	NDUFB9	A_24_P154006	-0.657841	0.000102211				UBX domain protein 8	UBXN8	A_23_P157465	-0.676397	0.00046817				KIAA1715	KIAA1715	A_32_P31771	-0.93284	1.10133e-05				glycogen synthase kinase 3 beta	GSK3B	A_23_P251342	-0.92941	9.9336e-08				cullin 2	CUL2	A_24_P252794	-0.939509	0.000739762
		N-acetylglucosamine kinase	NAGK	A_23_P154208	-0.691771	3.36609e-05				nuclear transport factor 2	NUTF2	A_23_P118038	-0.657276	1.17203e-05				tetratricopeptide repeat domain 28	TTC28	A_32_P100683	-0.676344	4.02437e-05				family with sequence similarity 190, member B	FAM190B	A_33_P3214314	-0.932801	1.31169e-06				trafficking protein particle complex 2-like	TRAPPC2L	A_24_P327050	-0.926904	2.55299e-07				DEAD (Asp-Glu-Ala-Asp) box polypeptide 59	DDX59	A_24_P156886	-0.93832	6.62358e-07
		solute carrier family 1 (glial high affinity glutamate transporter), member 3	SLC1A3	A_21_P0000065	-0.691301	0.00243425						A_33_P3374170	-0.656802	1.1329e-05				stathmin 1	STMN1	A_19_P00316238	-0.674042	0.000947868				tryptophanyl tRNA synthetase 2, mitochondrial	WARS2	A_33_P3338417	-0.930388	8.01598e-07				UDP-N-acetyl-alpha-D-galactosamine:polypeptide N-acetylgalactosaminyltransferase 11 (GalNAc-T11)	GALNT11	A_23_P8416	-0.921368	5.8639e-06				KIAA1217	KIAA1217	A_33_P3233580	-0.937236	2.98079e-05
		dynein, cytoplasmic 1, light intermediate chain 2	DYNC1LI2	A_33_P3374758	-0.690801	0.0048997				chromosome 16 open reading frame 42	C16orf42	A_23_P88753	-0.6563	0.000264523				KIAA1715	KIAA1715	A_32_P31771	-0.673506	0.000278098				calmodulin 2 (phosphorylase kinase, delta)	CALM2	A_33_P3212782	-0.927686	0.000990356				cytochrome b5 type A (microsomal)	CYB5A	A_33_P3311076	-0.920975	1.458e-06				ribosomal protein S3A	RPS3A	A_32_P135818	-0.936338	2.1675e-05
		mitochondrial ribosomal protein L37	MRPL37	A_33_P3297921	-0.689571	0.0030167				family with sequence similarity 185, member A	FAM185A	A_24_P272548	-0.653726	0.000840887				lon peptidase 1, mitochondrial	LONP1	A_33_P3312365	-0.671191	0.00221451				zinc finger, NFX1-type containing 1	ZNFX1	A_24_P23034	-0.927567	5.13487e-06				pancreatic progenitor cell differentiation and proliferation factor homolog (zebrafish)	PPDPF	A_23_P120364	-0.920636	7.87117e-06				adaptor-related protein complex 1, sigma 1 subunit	AP1S1	A_23_P157404	-0.933216	0.000761679
		arylacetamide deacetylase-like 3	AADACL3	A_33_P3307965	-0.689047	0.000499492				apolipoprotein L, 4	APOL4	A_23_P380857	-0.649704	0.0015958				coiled-coil domain containing 53	CCDC53	A_23_P53567	-0.670853	2.1478e-05				PRP40 pre-mRNA processing factor 40 homolog A (S. cerevisiae)	PRPF40A	A_23_P16762	-0.92638	7.77373e-05				nucleoporin 37kDa	NUP37	A_23_P48099	-0.920617	1.8409e-06				tropomyosin 1 (alpha)	TPM1	A_24_P44462	-0.932573	1.40303e-07
		mitochondrial intermediate peptidase	MIPEP	A_23_P117274	-0.68802	0.000269759				phosphodiesterase 9A	PDE9A	A_23_P29096	-0.648488	0.000346768				uncharacterized LOC100216546	LOC100216546	A_19_P00320028	-0.670414	0.000936616				T-cell lymphoma invasion and metastasis 2	TIAM2	A_24_P303454	-0.923302	4.96642e-06				chromosome 3 open reading frame 39	C3orf39	A_24_P217330	-0.918309	5.81628e-05				intracisternal A particle-promoted polypeptide	IPP	A_23_P9662	-0.927639	7.1039e-07
		family with sequence similarity 78, member A	FAM78A	A_23_P314250	-0.685956	0.000285953				pituitary tumor-transforming 3, pseudogene	PTTG3P	A_23_P60016	-0.643406	0.00313002				exocyst complex component 3-like 4	EXOC3L4	A_33_P3360972	-0.668951	0.00262155						A_24_P865672	-0.922692	0.00226896				DnaJ (Hsp40) homolog, subfamily C, member 21	DNAJC21	A_33_P3310533	-0.914665	4.93684e-06				family with sequence similarity 173, member A	FAM173A	A_23_P54728	-0.925535	1.31093e-07
		ubiquitin specific peptidase 7 (herpes virus-associated)	USP7	A_24_P245108	-0.684209	0.000704458				zinc finger and SCAN domain containing 20	ZSCAN20	A_33_P3407384	-0.641629	0.000395495				calpain 5	CAPN5	A_33_P3393170	-0.668783	0.000818814				WD repeat domain 44	WDR44	A_33_P3239736	-0.922077	3.27459e-05				Shwachman-Bodian-Diamond syndrome	SBDS	A_33_P3238866	-0.91446	0.000956944					XLOC_l2_009442	A_21_P0012331	-0.923031	0.000316441
		mediator complex subunit 31	MED31	A_33_P3362526	-0.683013	0.000105512				dedicator of cytokinesis 10	DOCK10	A_23_P16722	-0.641285	1.23112e-05				chromosome 4 open reading frame 27	C4orf27	A_24_P49371	-0.667919	0.00192871					XLOC_l2_008203	A_21_P0011950	-0.9217	3.29058e-07				RAB37, member RAS oncogene family	RAB37	A_33_P3314594	-0.914288	1.88656e-06				NIF3 NGG1 interacting factor 3-like 1 (S. cerevisiae)	NIF3L1	A_33_P3255766	-0.922945	4.83406e-05
		zinc finger protein 774	ZNF774	A_33_P3311740	-0.680275	0.000567034					XLOC_006390	A_21_P0005486	-0.641245	6.17791e-05				mitotic spindle organizing protein 2A	MZT2A	A_23_P165676	-0.667825	0.000865152				nuclear transport factor 2-like	LOC128322	A_33_P3399718	-0.919734	3.28635e-07				NAD synthetase 1	NADSYN1	A_23_P35848	-0.913986	2.18201e-05				STEAP family member 1B	STEAP1B	A_21_P0000044	-0.92021	2.69777e-05
		TAR (HIV-1) RNA binding protein 1	TARBP1	A_23_P52058	-0.67721	0.000745489				integrator complex subunit 4	INTS4	A_21_P0013386	-0.639673	0.00297951				zinc finger, FYVE domain containing 9	ZFYVE9	A_32_P143048	-0.66738	0.00170993				transmembrane protein 17	TMEM17	A_32_P206949	-0.918805	2.81539e-06						A_19_P00319503	-0.912344	9.47105e-05						A_33_P3376925	-0.920105	1.29775e-05
		long intergenic non-protein coding RNA 478	LINC00478	A_33_P3312384	-0.675466	0.000847469						A_24_P647682	-0.638223	0.000449647				La ribonucleoprotein domain family, member 7	LARP7	A_24_P332230	-0.66527	8.6734e-05				NIMA (never in mitosis gene a)-related kinase 1	NEK1	A_23_P124427	-0.918787	3.80453e-05				SAP30-like	SAP30L	A_23_P368101	-0.911664	8.68757e-08				pancreatic progenitor cell differentiation and proliferation factor homolog (zebrafish)	PPDPF	A_23_P120364	-0.919645	7.9641e-06
		UEV and lactate/malate dehyrogenase domains	UEVLD	A_24_P135193	-0.674774	4.90053e-06				long intergenic non-protein coding RNA 478	LINC00478	A_33_P3312384	-0.635823	0.0013726				small nucleolar RNA, H/ACA box 18	SNORA18	A_21_P0000315	-0.664662	0.000311153				general transcription factor IIE, polypeptide 2, beta 34kDa	GTF2E2	A_23_P94118	-0.918603	0.000683369				zinc finger protein 76	ZNF76	A_23_P8139	-0.911558	9.2958e-05				ASF1 anti-silencing function 1 homolog B (S. cerevisiae)	ASF1B	A_23_P119254	-0.917607	5.86362e-07
		Rho GTPase activating protein 28	ARHGAP28	A_24_P579356	-0.672702	0.00351724				heat shock 70kDa protein 2	HSPA2	A_23_P88303	-0.635481	7.23892e-05				nuclear paraspeckle assembly transcript 1 (non-protein coding)	NEAT1	A_33_P3263538	-0.663845	0.00229254				zinc finger, DHHC-type containing 20	ZDHHC20	A_23_P99397	-0.915176	1.15367e-05				hook homolog 1 (Drosophila)	HOOK1	A_33_P3409844	-0.911302	9.03435e-05				TBC1 domain family, member 7	TBC1D7	A_33_P3311907	-0.914172	1.62158e-06
			XLOC_l2_003293	A_21_P0011084	-0.672519	4.39756e-05				tryptophanyl tRNA synthetase 2, mitochondrial	WARS2	A_33_P3338417	-0.632178	5.43574e-05				carboxypeptidase, vitellogenic-like	CPVL	A_23_P134347	-0.662721	0.000102846				LSM6 homolog, U6 small nuclear RNA associated (S. cerevisiae)	LSM6	A_23_P259451	-0.913846	3.19196e-05				catenin (cadherin-associated protein), delta 1	CTNND1	A_23_P251316	-0.910386	1.9797e-06				BCS1-like (S. cerevisiae)	BCS1L	A_23_P154086	-0.912484	6.98795e-06
		chromosome 16 open reading frame 42	C16orf42	A_23_P88753	-0.672423	0.00021214				exocyst complex component 3-like 4	EXOC3L4	A_33_P3360972	-0.631117	0.00394458				zinc finger protein 138	ZNF138	A_23_P59855	-0.662643	0.00175345				TMEM56-RWDD3 readthrough	TMEM56-RWDD3	A_21_P0000145	-0.909739	0.000131545				Leo1, Paf1/RNA polymerase II complex component, homolog (S. cerevisiae)	LEO1	A_33_P3270109	-0.905852	3.74775e-05				trafficking protein particle complex 2-like	TRAPPC2L	A_24_P327050	-0.911146	3.13685e-07
				A_33_P3252491	-0.672319	0.00948842						A_24_P135501	-0.630646	0.00070069				ADAM metallopeptidase domain 21	ADAM21	A_23_P367420	-0.661918	0.000246576				ArfGAP with SH3 domain, ankyrin repeat and PH domain 2	ASAP2	A_24_P362540	-0.907424	5.34668e-05				WD repeat domain 44	WDR44	A_33_P3239736	-0.905709	3.93103e-05				PDGFA associated protein 1	PDAP1	A_23_P123256	-0.907451	8.34911e-06
				A_24_P307384	-0.670783	0.00113618				transcriptional regulating factor 1	TRERF1	A_24_P217904	-0.629444	0.0010133				complement component 4 binding protein, beta	C4BPB	A_23_P319598	-0.661591	0.0144648				ribosomal protein L13	RPL13	A_24_P142228	-0.907353	2.29687e-06				leucine rich transmembrane and 0-methyltransferase domain containing	LRTOMT	A_23_P98763	-0.905546	6.71044e-08				ArfGAP with SH3 domain, ankyrin repeat and PH domain 2	ASAP2	A_24_P362540	-0.907348	5.35111e-05
		centrosome and spindle pole associated protein 1	CSPP1	A_23_P71537	-0.670655	0.000319227				eukaryotic translation initiation factor 1A, Y-linked	EIF1AY	A_23_P148629	-0.628518	0.000754312				nucleoporin 37kDa	NUP37	A_23_P48099	-0.661158	6.39587e-05				Rho GTPase activating protein 28	ARHGAP28	A_24_P579356	-0.904561	0.000338696				calcium/calmodulin-dependent protein kinase kinase 2, beta	CAMKK2	A_23_P408830	-0.904033	2.55039e-07				protein kinase domain containing, cytoplasmic homolog (mouse)	PKDCC	A_32_P112493	-0.900434	0.000748547
		nucleoporin 37kDa	NUP37	A_23_P48099	-0.670329	5.57814e-05				succinate dehydrogenase complex, subunit A, flavoprotein (Fp)	SDHA	A_33_P3399492	-0.627143	0.00173396				basic transcription factor 3	BTF3	A_24_P183264	-0.661105	2.17359e-05				ATP synthase, H+ transporting, mitochondrial F1 complex, delta subunit	ATP5D	A_23_P5089	-0.903793	9.73289e-06				beta-site APP-cleaving enzyme 2	BACE2	A_23_P154875	-0.90333	1.67001e-05				Meis homeobox 2	MEIS2	A_23_P88602	-0.899605	6.43951e-05
		cholinergic receptor, nicotinic, alpha 10	CHRNA10	A_23_P411188	-0.668056	0.0007986				nucleoporin 37kDa	NUP37	A_23_P48099	-0.626025	0.000108856				Leo1, Paf1/RNA polymerase II complex component, homolog (S. cerevisiae)	LEO1	A_23_P314222	-0.661018	0.000301263				Werner helicase interacting protein 1	WRNIP1	A_24_P192197	-0.901151	1.62308e-06				coiled-coil domain containing 51	CCDC51	A_23_P69362	-0.901633	1.75143e-05				chromosome alignment maintaining phosphoprotein 1	CHAMP1	A_23_P164559	-0.898956	9.30611e-06
		small nuclear RNA activating complex, polypeptide 1, 43kDa	SNAPC1	A_33_P3316223	-0.666101	0.000288328				chromosome 4 open reading frame 47	C4orf47	A_33_P3247175	-0.625392	0.00217442				ceramide kinase	CERK	A_24_P62237	-0.656959	5.96758e-05				family with sequence similarity 35, member A	FAM35A	A_33_P3357149	-0.895137	5.24454e-07				tubulin, beta 4B class IVb	TUBB4B	A_23_P312863	-0.900925	5.83458e-07				tetratricopeptide repeat domain 28	TTC28	A_32_P100683	-0.898736	1.85186e-06
		mitogen-activated protein kinase kinase 6	MAP2K6	A_23_P207445	-0.664626	0.000346415				excision repair cross-complementing rodent repair deficiency, complementation group 6-like	ERCC6L	A_23_P96325	-0.62481	0.00365012				chromosome 4 open reading frame 47	C4orf47	A_33_P3247175	-0.656646	0.00150555				nuclear transport factor 2	NUTF2	A_23_P118038	-0.894639	3.50468e-07						A_33_P3308115	-0.896966	3.43012e-06				heat shock protein 90kDa alpha (cytosolic), class B member 2, pseudogene	HSP90AB2P	A_33_P3324890	-0.895636	0.00013687
		chromobox homolog 1	CBX1	A_24_P298174	-0.664169	0.0072326				chromosome 14 open reading frame 135	C14orf135	A_23_P163059	-0.624474	3.29181e-05				heterogeneous nuclear ribonucleoprotein C (C1/C2)	HNRNPC	A_32_P142028	-0.655759	0.00573174					Q39472	A_19_P00321317	-0.893732	1.82512e-05				family with sequence similarity 173, member A	FAM173A	A_23_P54728	-0.896536	1.93029e-07						A_33_P3308115	-0.895448	3.49598e-06
		SMAD family member 6	SMAD6	A_33_P3220470	-0.663758	1.61129e-05				trinucleotide repeat containing 6C	TNRC6C	A_33_P3302428	-0.621591	0.0059498				small nucleolar RNA, C/D box 91A	SNORD91A	A_21_P0000388	-0.655428	0.00138554				dolichol kinase	DOLK	A_23_P10870	-0.893682	6.62874e-07						A_19_P00319050	-0.894425	1.49776e-05						A_33_P3413353	-0.893506	1.99549e-05
		pseudouridylate synthase 3	PUS3	A_23_P13073	-0.662751	1.88685e-05				dynein, light chain, Tctex-type 3	DYNLT3	A_24_P100368	-0.620432	0.00848046					XLOC_011183	A_19_P00813085	-0.654588	0.000106742						A_33_P3308115	-0.892369	3.63371e-06				intracisternal A particle-promoted polypeptide	IPP	A_23_P9662	-0.890081	1.15126e-06					LOC100507149	A_21_P0014843	-0.891645	0.000333069
		cytochrome b5 type A (microsomal)	CYB5A	A_33_P3311076	-0.660715	5.28238e-05				nuclear transport factor 2-like	LOC128322	A_33_P3399718	-0.620187	2.73401e-05				heat shock protein 90kDa alpha (cytosolic), class B member 1	HSP90AB1	A_23_P145089	-0.652765	0.000119024				stress-associated endoplasmic reticulum protein 1	SERP1	A_23_P91919	-0.889491	7.12382e-08				zinc finger, DHHC-type containing 17	ZDHHC17	A_24_P76995	-0.889795	4.4145e-05				uncharacterized LOC254057	LOC254057	A_33_P3613516	-0.891326	1.36294e-05
		lysophosphatidylcholine acyltransferase 1	LPCAT1	A_24_P406006	-0.660315	0.00138321				phenylalanyl-tRNA synthetase, beta subunit	FARSB	A_23_P165355	-0.619895	0.000432858				tryptophan rich basic protein	WRB	A_23_P80122	-0.652321	0.0217574						A_19_P00319503	-0.888974	0.000121481				chromosome 3 open reading frame 78	C3orf78	A_23_P370924	-0.888328	0.000344784				prolyl endopeptidase	PREP	A_33_P3230976	-0.890461	2.14187e-05
		FK506 binding protein 2, 13kDa	FKBP2	A_33_P3273020	-0.659792	2.21388e-05				La ribonucleoprotein domain family, member 7	LARP7	A_24_P332230	-0.61981	0.000170096				chromobox homolog 1	CBX1	A_24_P298174	-0.652159	0.00809359				catenin (cadherin-associated protein), delta 1	CTNND1	A_23_P251316	-0.887474	2.64573e-06				DCP1 decapping enzyme homolog A (S. cerevisiae)	DCP1A	A_23_P166826	-0.887142	2.09713e-05					SDIM1	A_21_P0014941	-0.890301	0.000358797
		DEP domain containing 4	DEPDC4	A_32_P137966	-0.658965	0.000183664				complement component 4 binding protein, beta	C4BPB	A_23_P319598	-0.619076	0.0205309				zinc finger, DHHC-type containing 11	ZDHHC11	A_33_P3344204	-0.652087	0.000135407				coiled-coil domain containing 51	CCDC51	A_23_P69362	-0.885303	2.12226e-05						A_33_P3221980	-0.886563	1.29191e-05				carbamoyl-phosphate synthetase 2, aspartate transcarbamylase, and dihydroorotase	CAD	A_23_P40049	-0.890048	0.000158442
		breast cancer anti-estrogen resistance 1	BCAR1	A_33_P3395738	-0.658477	0.000809739				ribosomal protein L32 pseudogene 3	RPL32P3	A_33_P3775741	-0.618403	3.52136e-05				CD19 molecule	CD19	A_23_P113572	-0.651093	0.000986712				ring finger protein 2	RNF2	A_23_P85543	-0.883072	3.44339e-05				TMEM56-RWDD3 readthrough	TMEM56-RWDD3	A_21_P0000145	-0.886262	0.000168164				RAD54-like 2 (S. cerevisiae)	RAD54L2	A_23_P18205	-0.889747	1.68203e-06
		kelch repeat and BTB (POZ) domain containing 4	KBTBD4	A_23_P202696	-0.655541	1.79197e-05				interleukin 18 receptor 1	IL18R1	A_24_P208567	-0.615835	0.000959234				ribosomal protein L9	RPL9	A_23_P7066	-0.648874	0.00059483				protein kinase C substrate 80K-H	PRKCSH	A_24_P396197	-0.882894	0.000249087				stress-associated endoplasmic reticulum protein 1	SERP1	A_23_P91919	-0.884918	7.59131e-08				ribosomal protein S3A	RPS3A	A_32_P58074	-0.882757	3.54361e-05
		tryptophanyl tRNA synthetase 2, mitochondrial	WARS2	A_33_P3338417	-0.655156	3.79318e-05				TAR (HIV-1) RNA binding protein 1	TARBP1	A_23_P52058	-0.615614	0.00159267				tripartite motif containing 27	TRIM27	A_24_P163405	-0.648747	0.000849312				lysine (K)-specific demethylase 1A	KDM1A	A_24_P74981	-0.879217	8.54283e-06				family with sequence similarity 35, member A	FAM35A	A_33_P3357149	-0.880794	6.34746e-07				ribosomal protein L13	RPL13	A_24_P142228	-0.882575	3.1424e-06
		uncharacterized LOC100505738	LOC100505738	A_19_P00805523	-0.654716	0.000182206				stathmin 1	STMN1	A_19_P00316238	-0.614993	0.00193453					XLOC_l2_003293	A_21_P0011086	-0.648504	0.000497095				CDC-like kinase 3	CLK3	A_32_P20691	-0.87727	1.23933e-05				ArfGAP with SH3 domain, ankyrin repeat and PH domain 2	ASAP2	A_24_P362540	-0.878634	7.35758e-05				zinc finger, NFX1-type containing 1	ZNFX1	A_24_P23034	-0.881851	8.93771e-06
		LIM domain only 4	LMO4	A_23_P380181	-0.653875	0.00024124				WD repeat domain 12	WDR12	A_23_P28625	-0.614719	0.000378458						A_24_P349547	-0.647761	1.21889e-05				chloride channel 5	CLCN5	A_33_P3415087	-0.876942	3.54321e-07				DEAD (Asp-Glu-Ala-Asp) box polypeptide 59	DDX59	A_24_P156886	-0.878029	1.43655e-06				cutC copper transporter homolog (E. coli)	CUTC	A_23_P98015	-0.880582	0.000132095
		potassium voltage-gated channel, KQT-like subfamily, member 2	KCNQ2	A_33_P3360758	-0.652361	0.000251519				tubulin, beta 8 class VIII	TUBB8	A_24_P813147	-0.613686	0.000425552				wingless-type MMTV integration site family, member 5A	WNT5A	A_33_P3341499	-0.647556	0.000993263				COBW domain containing 5	CBWD5	A_24_P25080	-0.875616	0.000126417						A_24_P307384	-0.875181	0.000110187				TROVE domain family, member 2	TROVE2	A_24_P222684	-0.87986	3.05064e-05
		eukaryotic translation initiation factor 3, subunit F	EIF3F	A_23_P142776	-0.652098	0.00057407				mitochondrial ribosomal protein L37	MRPL37	A_33_P3297921	-0.612868	0.00664237				family with sequence similarity 83, member H	FAM83H	A_23_P421175	-0.646828	7.84835e-05				uncharacterized LOC254057	LOC254057	A_33_P3613516	-0.874632	1.66607e-05				T-cell lymphoma invasion and metastasis 2	TIAM2	A_24_P303454	-0.8734	9.13489e-06				family with sequence similarity 131, member A	FAM131A	A_23_P41204	-0.879176	3.66389e-06
		heterogeneous nuclear ribonucleoprotein K	HNRNPK	A_33_P3362727	-0.65142	7.42525e-05						A_24_P349547	-0.612844	2.19099e-05				bromodomain and WD repeat domain containing 3	BRWD3	A_32_P489130	-0.645876	0.000216767				glycogen synthase kinase 3 beta	GSK3B	A_23_P251342	-0.873448	2.116e-07				replication factor C (activator 1) 1, 145kDa	RFC1	A_23_P18465	-0.872681	3.44391e-05				protein tyrosine phosphatase, non-receptor type 9	PTPN9	A_23_P124486	-0.878862	1.53579e-05
		succinate dehydrogenase complex, subunit A, flavoprotein (Fp)	SDHA	A_33_P3399492	-0.650428	0.00130976				acetyl-CoA acetyltransferase 1	ACAT1	A_24_P203678	-0.612187	0.000129379				Fc fragment of IgG binding protein	FCGBP	A_23_P21495	-0.644874	0.000432681				general transcription factor IIA, 1, 19/37kDa	GTF2A1	A_23_P65609	-0.87195	0.00025625				chromobox homolog 1	CBX1	A_24_P298174	-0.867572	0.00108685				ribosomal protein S3A	RPS3A	A_24_P383999	-0.873939	4.24762e-05
		NADH dehydrogenase, subunit 6 (complex I)	ND6	A_23_P317056	-0.649434	0.000280171						A_33_P3397298	-0.611041	0.00102896				psoriasis susceptibility 1 candidate 3 (non-protein coding)	PSORS1C3	A_33_P3297020	-0.641608	0.00444465				tropomyosin 1 (alpha)	TPM1	A_24_P44462	-0.871758	3.1696e-07				ribosomal protein S3A	RPS3A	A_32_P135818	-0.865617	4.84791e-05				RAD23 homolog B (S. cerevisiae)	RAD23B	A_33_P3312039	-0.873456	0.000433406
				A_32_P101844	-0.647599	0.00397856				uncharacterized LOC152742	LOC152742	A_21_P0012715	-0.610303	0.000388072				mirror-image polydactyly 1	MIPOL1	A_33_P3335228	-0.640579	0.00224789				family with sequence similarity 173, member A	FAM173A	A_23_P54728	-0.871113	2.73121e-07				trafficking protein particle complex 4	TRAPPC4	A_23_P127613	-0.865031	2.11942e-06				transformer 2 alpha homolog (Drosophila)	TRA2A	A_23_P31389	-0.872195	2.9525e-06
		uncharacterized LOC100128851	LOC100128851	A_33_P3411885	-0.645846	2.28324e-05				eukaryotic translation initiation factor 3, subunit F	EIF3F	A_23_P142776	-0.610008	0.000995781				signal recognition particle 19kDa	SRP19	A_24_P388810	-0.640104	0.000772869				Yip1 domain family, member 5	YIPF5	A_24_P328969	-0.86397	7.62783e-05				utrophin	UTRN	A_32_P524014	-0.864708	2.91532e-05				complement component 4 binding protein, beta	C4BPB	A_23_P319598	-0.871467	0.00251399
		HRAS-like suppressor family, member 5	HRASLS5	A_23_P416314	-0.645428	0.000754078				Ras suppressor protein 1	RSU1	A_23_P149813	-0.609672	6.84368e-05				protein phosphatase 4, catalytic subunit	PPP4C	A_23_P100355	-0.639804	8.34373e-05				coatomer protein complex, subunit gamma 2	COPG2	A_23_P61280	-0.861584	2.87284e-07				small nuclear ribonucleoprotein 35kDa (U11/U12)	SNRNP35	A_23_P159101	-0.863243	9.58939e-05				RAB37, member RAS oncogene family	RAB37	A_33_P3314594	-0.871441	3.25266e-06
		erythrocyte membrane protein band 4.1-like 1	EPB41L1	A_23_P154806	-0.645086	0.000143361				Yip1 domain family, member 5	YIPF5	A_24_P328969	-0.608305	0.00163651				uncharacterized LOC100505821	LOC100505821	A_21_P0001545	-0.639591	0.000109761				phosphodiesterase 9A	PDE9A	A_23_P29096	-0.860878	2.24526e-05				keratin 83	KRT83	A_33_P3273552	-0.862549	1.65296e-05				neuregulin 1	NRG1	A_33_P3284345	-0.86977	0.000283423
		transaldolase 1	TALDO1	A_32_P18258	-0.645003	0.00498265				lysosomal-associated membrane protein 2	LAMP2	A_33_P3410409	-0.607184	3.0419e-05				general transcription factor IIF, polypeptide 1, 74kDa	GTF2F1	A_23_P16143	-0.638272	0.00159101				cyclin M3	CNNM3	A_33_P3255274	-0.859441	1.87218e-07				dolichol kinase	DOLK	A_23_P10870	-0.860975	1.02576e-06				differentially expressed in FDCP 8 homolog (mouse)	DEF8	A_23_P88893	-0.867523	1.91648e-07
		adaptor protein, phosphotyrosine interaction, PH domain and leucine zipper containing 1	APPL1	A_23_P166663	-0.644974	0.00144064				disabled homolog 2, mitogen-responsive phosphoprotein (Drosophila)	DAB2	A_33_P3338928	-0.606936	0.000404375					XLOC_l2_006648	A_21_P0011768	-0.637319	0.000366052				leucine rich transmembrane and 0-methyltransferase domain containing	LRTOMT	A_23_P98763	-0.857615	1.30834e-07				ribosomal protein L13	RPL13	A_24_P142228	-0.858597	4.27875e-06				transmembrane protein 50A	TMEM50A	A_24_P113824	-0.86746	1.07145e-06
		tripartite motif containing 27	TRIM27	A_24_P163405	-0.643948	0.000902235				multiple EGF-like-domains 8	MEGF8	A_33_P3715177	-0.606912	0.000142408				hexokinase domain containing 1	HKDC1	A_33_P3335233	-0.63382	0.000190879						A_24_P247454	-0.855145	0.000120669				zinc finger, DHHC-type containing 20	ZDHHC20	A_23_P99397	-0.857502	2.29769e-05				solute carrier family 25 (carnitine/acylcarnitine translocase), member 20	SLC25A20	A_23_P72025	-0.867365	0.000171416
		Leo1, Paf1/RNA polymerase II complex component, homolog (S. cerevisiae)	LEO1	A_23_P314222	-0.643846	0.000380287						A_23_P25069	-0.606803	0.00312673						A_33_P3280502	-0.633222	0.0189167						A_33_P3252491	-0.854144	0.00190325				family with sequence similarity 82, member A2	FAM82A2	A_33_P3375234	-0.857095	9.2389e-06				SH3-domain binding protein 5 (BTK-associated)	SH3BP5	A_24_P148750	-0.864618	2.39356e-05
		uncharacterized LOC100289388	LOC100289388	A_21_P0007241	-0.64262	0.0020917				eukaryotic translation initiation factor 4A1	EIF4A1	A_32_P135902	-0.60538	0.000902234				transducin (beta)-like 1 X-linked receptor 1	TBL1XR1	A_33_P3348614	-0.633032	0.0100412				wingless-type MMTV integration site family, member 5A	WNT5A	A_33_P3341499	-0.853874	8.45538e-05				cell division cycle 16 homolog (S. cerevisiae)	CDC16	A_33_P3392325	-0.856728	1.14806e-05				nuclear receptor interacting protein 3	NRIP3	A_33_P3244956	-0.863122	2.14865e-05
		NIMA (never in mitosis gene a)-related kinase 1	NEK1	A_23_P124427	-0.64226	0.00100336				TM2 domain containing 1	TM2D1	A_23_P148959	-0.605368	7.72086e-05				chromosome 21 open reading frame 88	C21orf88	A_24_P267664	-0.632402	0.00131763						A_33_P3376925	-0.85181	2.91673e-05				zinc finger, NFX1-type containing 1	ZNFX1	A_24_P23034	-0.85502	1.24703e-05				mitogen-activated protein kinase kinase 5	MAP2K5	A_24_P356130	-0.860636	4.46588e-05
		zinc finger CCCH-type, antiviral 1	ZC3HAV1	A_33_P3397418	-0.641945	0.000232577				tripartite motif containing 27	TRIM27	A_24_P163405	-0.605342	0.00147207				pancreatic progenitor cell differentiation and proliferation factor homolog (zebrafish)	PPDPF	A_23_P120364	-0.631973	0.000330901				lymphocyte antigen 6 complex, locus E	LY6E	A_24_P317762	-0.849579	0.000318491				alkB, alkylation repair homolog 8 (E. coli)	ALKBH8	A_23_P371876	-0.850995	0.000347453				catenin (cadherin-associated protein), alpha-like 1	CTNNAL1	A_33_P3260605	-0.858878	1.31059e-05
			XLOC_001265	A_21_P0001246	-0.641858	0.00431514				coiled-coil domain containing 53	CCDC53	A_23_P53567	-0.604957	6.15882e-05				allograft inflammatory factor 1-like	AIF1L	A_33_P3260026	-0.631109	0.00103911				pancreatic progenitor cell differentiation and proliferation factor homolog (zebrafish)	PPDPF	A_23_P120364	-0.849428	1.86513e-05				coiled-coil and C2 domain containing 1A	CC2D1A	A_23_P55873	-0.846865	1.11896e-05				hepatoma-derived growth factor-related protein 2	HDGFRP2	A_23_P101699	-0.856818	2.18059e-06
				A_33_P3340757	-0.641811	0.000512546				wingless-type MMTV integration site family, member 5A	WNT5A	A_33_P3341499	-0.604251	0.00170622				small nucleolar RNA, H/ACA box 74B	SNORA74B	A_33_P3222367	-0.631023	0.00186749				dihydroorotate dehydrogenase (quinone)	DHODH	A_23_P15202	-0.8493	4.2854e-06				adenosine deaminase, RNA-specific, B1	ADARB1	A_33_P3399061	-0.846083	0.000232098				MTOR associated protein, LST8 homolog (S. cerevisiae)	MLST8	A_33_P3256054	-0.85635	3.44496e-06
		tet methylcytosine dioxygenase 1	TET1	A_19_P00806490	-0.641608	0.000298189				anterior pharynx defective 1 homolog B (C. elegans)	APH1B	A_23_P205997	-0.602743	0.000131238				trafficking protein particle complex 2-like	TRAPPC2L	A_24_P327050	-0.630701	1.99873e-05				N-acetylglucosamine kinase	NAGK	A_23_P154208	-0.849112	3.73005e-06				long intergenic non-protein coding RNA 473	LINC00473	A_33_P3394272	-0.845157	0.000215089				KIAA0368	KIAA0368	A_33_P3404286	-0.855458	1.13667e-06
		trafficking protein particle complex 6A	TRAPPC6A	A_24_P390928	-0.641197	0.00315023				Rab9 effector protein with kelch motifs	RABEPK	A_33_P3278220	-0.602707	0.0126381				chromosome 14 open reading frame 135	C14orf135	A_23_P163059	-0.630698	2.97301e-05				Meis homeobox 2	MEIS2	A_23_P88602	-0.847055	0.000115592				chromosome 9 open reading frame 43	C9orf43	A_23_P320862	-0.843168	1.87992e-06				NIMA (never in mitosis gene a)-related kinase 1	NEK1	A_23_P124427	-0.850535	8.20897e-05
		exocyst complex component 7	EXOC7	A_33_P3390027	-0.640279	0.00698451				aldo-keto reductase family 1, member C3 (3-alpha hydroxysteroid dehydrogenase, type II)	AKR1C3	A_23_P138541	-0.602249	0.00849132				uncharacterized LOC401320	LOC401320	A_19_P00318191	-0.630629	0.000733322				chromosome 1 open reading frame 174	C1orf174	A_24_P298877	-0.846681	5.95965e-05						A_32_P514599	-0.84251	0.000272548					XLOC_l2_008203	A_21_P0011950	-0.847041	8.93947e-07
		Cdc42 guanine nucleotide exchange factor (GEF) 9	ARHGEF9	A_24_P254551	-0.640155	0.000470778					XLOC_l2_007656	A_21_P0011867	-0.602243	0.00689188					XLOC_002075	A_21_P0002045	-0.629989	0.0057641				SAP30-like	SAP30L	A_23_P368101	-0.845435	2.1784e-07				lymphocyte antigen 6 complex, locus E	LY6E	A_24_P317762	-0.840918	0.000348762				alkB, alkylation repair homolog 8 (E. coli)	ALKBH8	A_23_P371876	-0.846976	0.000362263
				A_24_P303193	-0.639937	0.000156523				chromosome 5 open reading frame 13	C5orf13	A_24_P149124	-0.601557	0.000766867						A_33_P3334047	-0.629379	0.00218107				small nuclear ribonucleoprotein 35kDa (U11/U12)	SNRNP35	A_23_P159101	-0.843549	0.00011966				elongation factor RNA polymerase II-like 3	ELL3	A_24_P47988	-0.839254	1.24524e-05						A_33_P3235184	-0.845342	0.000194507
		prenylcysteine oxidase 1	PCYOX1	A_24_P940517	-0.639028	0.00047056						A_33_P3389578	-0.601391	0.0128779				butyrophilin, subfamily 3, member A2	BTN3A2	A_24_P252078	-0.628727	1.11295e-05				basic transcription factor 3 pseudogene 11	BTF3P11	A_23_P105900	-0.84091	6.43446e-07				WD repeat domain 26	WDR26	A_23_P85604	-0.837997	0.000266459				leucine zipper, putative tumor suppressor 1	LZTS1	A_23_P20443	-0.84297	3.72211e-05
		coiled-coil domain containing 53	CCDC53	A_23_P53567	-0.637846	3.61654e-05				glucuronidase, beta pseudogene 1	GUSBP1	A_24_P332739	-0.601305	0.00318453				protein disulfide isomerase family A, member 5	PDIA5	A_23_P167040	-0.628322	2.05531e-05				Y box binding protein 1	YBX1	A_24_P101391	-0.840583	0.00253327				death-domain associated protein	DAXX	A_23_P122579	-0.837541	3.71769e-06				replication factor C (activator 1) 1, 145kDa	RFC1	A_23_P18465	-0.84143	4.98228e-05
			XLOC_011183	A_19_P00813085	-0.636299	0.000139775				ankyrin repeat domain 42	ANKRD42	A_33_P3278144	-0.599051	6.3191e-05				kelch repeat and BTB (POZ) domain containing 4	KBTBD4	A_23_P202696	-0.626307	2.88359e-05				calpain 5	CAPN5	A_33_P3393170	-0.840388	0.000107025				KIAA1715	KIAA1715	A_32_P31771	-0.836797	3.44534e-05				coatomer protein complex, subunit gamma 2	COPG2	A_23_P61280	-0.840801	3.84795e-07
		heat shock 22kDa protein 8	HSPB8	A_23_P162579	-0.636067	9.85467e-05				U2 snRNP-associated SURP domain containing	U2SURP	A_24_P943106	-0.598743	0.00101095				tripartite motif containing 27	TRIM27	A_32_P137035	-0.626051	0.000151252						A_33_P3238225	-0.834634	9.47326e-06				uncharacterized LOC100506561	LOC100506561	A_21_P0014376	-0.831899	1.7546e-05				cytidine monophosphate (UMP-CMP) kinase 1, cytosolic	CMPK1	A_33_P3317988	-0.839005	8.55168e-05
		nuclear transport factor 2	NUTF2	A_23_P118038	-0.635558	1.67651e-05				eukaryotic elongation factor, selenocysteine-tRNA-specific	EEFSEC	A_23_P144202	-0.597512	0.0054156				ankyrin repeat domain 42	ANKRD42	A_33_P3278144	-0.625571	4.09467e-05				FIG4 homolog, SAC1 lipid phosphatase domain containing (S. cerevisiae)	FIG4	A_23_P145541	-0.832654	1.02579e-05				tubulin, beta 8 class VIII	TUBB8	A_24_P813147	-0.828339	2.40855e-05						A_19_P00319050	-0.83843	2.9462e-05
		phosphoinositide-3-kinase, regulatory subunit 1 (alpha)	PIK3R1	A_24_P29401	-0.635352	1.46669e-05				pancreatic progenitor cell differentiation and proliferation factor homolog (zebrafish)	PPDPF	A_23_P120364	-0.596939	0.000543124				adenylosuccinate synthase like 1	ADSSL1	A_23_P76823	-0.625516	0.000621904				Shwachman-Bodian-Diamond syndrome	SBDS	A_33_P3238866	-0.832247	0.00198876				CDK5 regulatory subunit associated protein 3	CDK5RAP3	A_24_P292964	-0.82696	0.000120646						A_24_P307384	-0.837506	0.000167
		anterior pharynx defective 1 homolog B (C. elegans)	APH1B	A_23_P205997	-0.634457	8.01393e-05				origin recognition complex, subunit 2	ORC2	A_33_P3381410	-0.596273	0.00717775				cancer/testis antigen family 45, member A5	CT45A5	A_32_P170547	-0.625478	9.21465e-05				SCAN domain containing 1	SCAND1	A_23_P6196	-0.832175	1.95814e-05				wingless-type MMTV integration site family, member 5A	WNT5A	A_33_P3341499	-0.825305	0.00011737				beta-site APP-cleaving enzyme 2	BACE2	A_23_P154875	-0.835586	3.75062e-05
		RIMS binding protein 3	RIMBP3	A_23_P154962	-0.633745	3.31707e-05				trafficking protein particle complex 6A	TRAPPC6A	A_24_P390928	-0.595677	0.00519692				myosin, light chain 9, regulatory	MYL9	A_23_P210425	-0.625029	8.15319e-05				ornithine decarboxylase 1	ODC1	A_23_P165840	-0.830127	1.70032e-05				dihydroorotate dehydrogenase (quinone)	DHODH	A_23_P15202	-0.823771	6.01007e-06				LysM, putative peptidoglycan-binding, domain containing 4	LYSMD4	A_23_P117734	-0.835301	2.75146e-06
		chaperonin containing TCP1, subunit 8 (theta)	CCT8	A_23_P102876	-0.633289	0.000307747				suppressor of G2 allele of SKP1 (S. cerevisiae) pseudogene 1	SUGT1P1	A_21_P0005985	-0.593002	0.00378535				periphilin 1	PPHLN1	A_33_P3368610	-0.624519	6.21185e-05				NAD synthetase 1	NADSYN1	A_23_P35848	-0.824173	6.25436e-05						A_33_P3413353	-0.823003	4.64577e-05				catenin (cadherin-associated protein), delta 1	CTNND1	A_23_P251316	-0.834896	5.24317e-06
		liver expressed antimicrobial peptide 2	LEAP2	A_24_P268993	-0.632416	0.000285159				NADH dehydrogenase (ubiquinone) Fe-S protein 6, 13kDa (NADH-coenzyme Q reductase)	NDUFS6	A_23_P122228	-0.592354	1.56004e-05				family with sequence similarity 92, member A1	FAM92A1	A_32_P103695	-0.623809	0.000120986				intracisternal A particle-promoted polypeptide	IPP	A_23_P9662	-0.823427	2.80875e-06						A_33_P3253832	-0.821717	6.43325e-05				RAB5B, member RAS oncogene family	RAB5B	A_23_P410998	-0.833568	3.64507e-05
		gamma-aminobutyric acid (GABA) A receptor, epsilon	GABRE	A_23_P159775	-0.632184	0.000661499				stress-induced-phosphoprotein 1	STIP1	A_32_P92783	-0.591127	0.00416114				methyltransferase like 21A	METTL21A	A_23_P156809	-0.621617	0.00689538				CDK5 regulatory subunit associated protein 3	CDK5RAP3	A_24_P292964	-0.822747	0.000126649				calmodulin binding transcription activator 1	CAMTA1	A_21_P0000131	-0.820603	6.18552e-06				chromosome 3 open reading frame 39	C3orf39	A_24_P217330	-0.831111	0.000152551
		Rho GTPase activating protein 28	ARHGAP28	A_23_P130359	-0.632014	0.000621427						A_33_P3284584	-0.591018	0.0376375				UDP-GlcNAc:betaGal beta-1,3-N-acetylglucosaminyltransferase 1	B3GNT1	A_23_P86900	-0.619426	1.45784e-05				SGT1, suppressor of G2 allele of SKP1 (S. cerevisiae)	SUGT1	A_24_P280706	-0.819394	2.64434e-07				N-acetylglucosamine kinase	NAGK	A_23_P154208	-0.818778	5.59041e-06				basic transcription factor 3 pseudogene 11	BTF3P11	A_23_P105900	-0.829754	7.52883e-07
		kinesin family member 1C	KIF1C	A_33_P3230709	-0.630994	1.67555e-05				serine/arginine-rich splicing factor 8	SRSF8	A_32_P17635	-0.590783	3.27255e-05				chromosome 14 open reading frame 37	C14orf37	A_24_P181295	-0.619277	0.000389006				utrophin	UTRN	A_32_P524014	-0.814739	5.33445e-05				NIF3 NGG1 interacting factor 3-like 1 (S. cerevisiae)	NIF3L1	A_33_P3255766	-0.817693	0.000156614				T-cell lymphoma invasion and metastasis 2	TIAM2	A_24_P303454	-0.827337	1.63243e-05
			XLOC_l2_000636	A_21_P0010740	-0.630461	0.000921651				endoplasmic reticulum aminopeptidase 2	ERAP2	A_23_P30243	-0.588646	0.000220826				chromosome 7 open reading frame 30	C7orf30	A_23_P145817	-0.619102	5.77733e-06				cell division cycle 16 homolog (S. cerevisiae)	CDC16	A_33_P3392325	-0.813496	1.98961e-05				Rho GTPase activating protein 28	ARHGAP28	A_24_P579356	-0.817397	0.000804006				IWS1 homolog (S. cerevisiae)	IWS1	A_23_P165574	-0.826164	1.00622e-06
		GLI family zinc finger 2	GLI2	A_23_P209246	-0.630348	0.000769757				fragile X mental retardation, autosomal homolog 1	FXR1	A_33_P3387300	-0.587576	0.000529972						A_33_P3334121	-0.617081	0.00107838				PNN-interacting serine/arginine-rich protein	PNISR	A_23_P122615	-0.812792	8.3909e-06				origin recognition complex, subunit 2	ORC2	A_33_P3381410	-0.814346	0.000749728				COBW domain containing 5	CBWD5	A_24_P25080	-0.822618	0.000226084
				A_33_P3308115	-0.629499	0.000135887				potassium voltage-gated channel, KQT-like subfamily, member 2	KCNQ2	A_33_P3360758	-0.587038	0.000631653				Shwachman-Bodian-Diamond syndrome	SBDS	A_33_P3238866	-0.616979	0.0138336				Rho GTPase activating protein 28	ARHGAP28	A_23_P130359	-0.810211	6.37242e-05				CDC-like kinase 3	CLK3	A_32_P20691	-0.814125	2.72102e-05				dihydroorotate dehydrogenase (quinone)	DHODH	A_23_P15202	-0.819676	6.34888e-06
		RNA binding motif protein, X-linked	RBMX	A_32_P56392	-0.629234	5.00969e-05				CD19 molecule	CD19	A_23_P113572	-0.58639	0.00221048				glyoxylate reductase 1 homolog (Arabidopsis)	GLYR1	A_32_P743407	-0.616497	0.0158162				transformer 2 alpha homolog (Drosophila)	TRA2A	A_23_P31389	-0.809497	6.77257e-06					XLOC_011183	A_19_P00813085	-0.81306	1.1736e-05				BTB (POZ) domain containing 7	BTBD7	A_23_P88184	-0.819194	0.000108958
			XLOC_l2_009273	A_21_P0012208	-0.627493	0.0113357				serum/glucocorticoid regulated kinase 1	SGK1	A_23_P19673	0.585849	7.23281e-05				ankyrin repeat domain 26	ANKRD26	A_23_P115597	-0.615796	3.60432e-05				DCP1 decapping enzyme homolog A (S. cerevisiae)	DCP1A	A_23_P166826	-0.807573	5.48221e-05				cerebral endothelial cell adhesion molecule	CERCAM	A_33_P3260575	-0.813012	0.000180746				hypoxia up-regulated 1	HYOU1	A_23_P75647	-0.815076	4.99723e-05
		angiopoietin-like 2	ANGPTL2	A_33_P3844650	-0.627137	0.00180636				zinc finger protein 614	ZNF614	A_33_P3268144	0.586692	0.000192578				heat shock 27kDa protein 1	HSPB1	A_33_P3353242	-0.613095	0.000316076				alkB, alkylation repair homolog 8 (E. coli)	ALKBH8	A_23_P371876	-0.805733	0.000557807				mitochondrial ribosomal protein L46	MRPL46	A_32_P209989	-0.812398	9.96088e-05				chromosome 9 open reading frame 43	C9orf43	A_23_P320862	-0.814738	2.7773e-06
		phosphoglycerate mutase 1 (brain)	PGAM1	A_33_P3268334	-0.62675	0.00608952				pim-3 oncogene	PIM3	A_23_P61398	0.586767	8.61422e-05				resistance to inhibitors of cholinesterase 8 homolog A (C. elegans)	RIC8A	A_24_P115971	-0.613065	0.000294428				STEAP family member 1B	STEAP1B	A_21_P0000044	-0.805026	0.000102603				RAD54-like 2 (S. cerevisiae)	RAD54L2	A_23_P18205	-0.810421	4.83003e-06				Yip1 domain family, member 5	YIPF5	A_24_P328969	-0.812245	0.000138121
			XLOC_002652	A_21_P0002741	-0.62641	0.00123401				forkhead box D1	FOXD1	A_32_P34920	0.586867	0.00320448						A_33_P3301095	-0.612065	0.000255008				transmembrane protein 208	TMEM208	A_33_P3335629	-0.804293	2.23733e-06				leucine rich repeat containing 49	LRRC49	A_33_P3344399	-0.809996	3.17609e-06				motile sperm domain containing 3	MOSPD3	A_33_P3321946	-0.811605	5.20401e-05
		oxoglutarate (alpha-ketoglutarate) dehydrogenase (lipoamide)	OGDH	A_24_P290770	-0.625709	0.00244689				hairy and enhancer of split 4 (Drosophila)	HES4	A_33_P3342628	0.587734	0.000158631				C17orf76 antisense RNA 1 (non-protein coding)	C17orf76-AS1	A_21_P0000530	-0.611933	0.00083373						A_24_P647682	-0.804149	5.18874e-05						A_32_P132477	-0.809774	9.91213e-06				LSM6 homolog, U6 small nuclear RNA associated (S. cerevisiae)	LSM6	A_23_P259451	-0.809503	0.00010646
		ribosomal protein S14	RPS14	A_23_P81492	-0.625321	0.000220285				zinc finger family member 783	ZNF783	A_23_P365418	0.587965	4.12415e-05				RAD23 homolog B (S. cerevisiae)	RAD23B	A_33_P3312039	-0.611789	0.00631605				chromosome 20 open reading frame 111	C20orf111	A_23_P79818	-0.803872	5.11638e-05				tripartite motif containing 27	TRIM27	A_24_P163405	-0.808612	0.00012072				wingless-type MMTV integration site family, member 5A	WNT5A	A_33_P3341499	-0.808361	0.000142877
		basic, immunoglobulin-like variable motif containing	BIVM	A_23_P105833	-0.624856	4.87327e-05				yippee-like 5 (Drosophila)	YPEL5	A_33_P3281408	0.588103	0.000481388				mannosidase, endo-alpha	MANEA	A_23_P255663	-0.611386	0.00354835				syntaxin binding protein 6 (amisyn)	STXBP6	A_24_P10214	-0.802741	2.06661e-06				ATPase, Ca++ transporting, ubiquitous	ATP2A3	A_23_P207632	-0.807882	3.05837e-05				aspartyl-tRNA synthetase	DARS	A_33_P3531857	-0.807776	9.10473e-06
		bromodomain and WD repeat domain containing 3	BRWD3	A_32_P489130	-0.624832	0.000292559				uncharacterized LOC145474	LOC145474	A_19_P00315493	0.589085	0.000291826				oxysterol binding protein-like 10	OSBPL10	A_23_P147245	-0.611301	1.06237e-05				chromosome 3 open reading frame 78	C3orf78	A_23_P370924	-0.801735	0.000825735				CD19 molecule	CD19	A_23_P113572	-0.80167	0.00016131				chromosome 1 open reading frame 174	C1orf174	A_24_P298877	-0.807541	9.47681e-05
		actinin, alpha 1	ACTN1	A_23_P105957	-0.623408	0.00507859					XLOC_005110	A_21_P0004479	0.590086	2.00224e-05				general transcription factor IIA, 1, 19/37kDa	GTF2A1	A_23_P65609	-0.609942	0.00431914				tubulin, beta 8 class VIII	TUBB8	A_24_P813147	-0.801615	3.37827e-05				Meis homeobox 2	MEIS2	A_23_P88602	-0.798598	0.000200823				chromosome 21 open reading frame 119	C21orf119	A_23_P29029	-0.805135	9.55451e-05
		hexokinase domain containing 1	HKDC1	A_33_P3335233	-0.622816	0.000224184				SR-related CTD-associated factor 8	SCAF8	A_23_P111303	0.590228	0.000339366				transient receptor potential cation channel, subfamily C, member 6	TRPC6	A_33_P3337627	-0.60961	0.0376768				protein phosphatase 1, catalytic subunit, gamma isozyme	PPP1CC	A_24_P386771	-0.800976	3.55337e-05				aldehyde dehydrogenase 4 family, member A1	ALDH4A1	A_32_P192970	-0.796129	1.93273e-05						A_32_P31992	-0.800492	3.50674e-07
		small nucleolar RNA, C/D box 91A	SNORD91A	A_21_P0000388	-0.622782	0.00204302				TBC1 domain family, member 10A	TBC1D10A	A_23_P166421	0.590917	0.000473986				thymidylate synthetase	TYMS	A_23_P50096	-0.608682	0.000117554				secernin 1	SCRN1	A_33_P3285893	-0.800427	0.000136282				A kinase (PRKA) anchor protein 8-like	AKAP8L	A_23_P153767	-0.795171	4.80769e-05				protein tyrosine phosphatase, receptor type, f polypeptide (PTPRF), interacting protein (liprin), alpha 1	PPFIA1	A_23_P75516	-0.800409	1.45247e-05
		Rho guanine nucleotide exchange factor (GEF) 4	ARHGEF4	A_24_P302685	-0.622275	0.000342547				growth arrest-specific 5 (non-protein coding)	GAS5	A_33_P3326285	0.591261	1.82036e-05					XLOC_006336	A_21_P0005594	-0.608263	2.08302e-05				excision repair cross-complementing rodent repair deficiency, complementation group 6-like	ERCC6L	A_23_P96325	-0.799903	0.000543406				glucuronidase, beta pseudogene 1	GUSBP1	A_24_P332739	-0.795162	0.000346181				eukaryotic elongation factor, selenocysteine-tRNA-specific	EEFSEC	A_23_P144202	-0.799139	0.000617446
		serine/arginine-rich splicing factor 8	SRSF8	A_32_P17635	-0.621106	1.94679e-05				long intergenic non-protein coding RNA 472	LINC00472	A_19_P00321739	0.592141	0.00478697				nuclear transcription factor Y, alpha	NFYA	A_24_P414719	-0.60631	0.000313749				transmembrane protein 147	TMEM147	A_23_P79043	-0.799795	2.50811e-06						A_24_P247454	-0.793715	0.000241432				leucine rich transmembrane and 0-methyltransferase domain containing	LRTOMT	A_23_P98763	-0.798505	3.10377e-07
		URB2 ribosome biogenesis 2 homolog (S. cerevisiae)	URB2	A_23_P74914	-0.620607	8.45673e-06				INO80 complex subunit D	INO80D	A_33_P3330716	0.592963	0.000225005				SMAD family member 6	SMAD6	A_33_P3220470	-0.60591	4.1451e-05				DnaJ (Hsp40) homolog, subfamily C, member 21	DNAJC21	A_33_P3310533	-0.798695	2.13031e-05				cyclin M3	CNNM3	A_33_P3255274	-0.793456	4.87977e-07				DCP1 decapping enzyme homolog A (S. cerevisiae)	DCP1A	A_23_P166826	-0.798454	6.13767e-05
		protein disulfide isomerase family A, member 5	PDIA5	A_23_P167040	-0.620186	2.35502e-05				cyclin-dependent kinase 20	CDK20	A_33_P3420442	0.593058	0.00333078				KH domain containing, RNA binding, signal transduction associated 3	KHDRBS3	A_33_P3394727	-0.605685	0.0107131				glutamate dehydrogenase 2	GLUD2	A_23_P45361	-0.79868	9.74604e-06				WD repeat domain 12	WDR12	A_23_P28625	-0.791393	3.41587e-05				KIAA0494	KIAA0494	A_24_P233917	-0.797307	8.29958e-05
		0		A_19_P00322992	-0.619742	0.000159288				neuralized homolog (Drosophila)	NEURL	A_33_P3293524	0.593854	0.000200651				mitogen-activated protein kinase associated protein 1	MAPKAP1	A_23_P216894	-0.605005	0.000571803				S-phase kinase-associated protein 2 (p45)	SKP2	A_23_P156310	-0.797753	1.04253e-06				component of oligomeric golgi complex 6	COG6	A_23_P53866	-0.790948	8.89431e-06				elongation factor RNA polymerase II-like 3	ELL3	A_24_P47988	-0.795899	2.18249e-05
		phenylalanyl-tRNA synthetase, beta subunit	FARSB	A_23_P165355	-0.619447	0.000435581				polo-like kinase 3	PLK3	A_23_P51646	0.594196	2.59945e-05					XLOC_006390	A_21_P0005486	-0.60457	0.000109684						A_24_P256063	-0.796944	0.000145346				transmembrane protein 184C	TMEM184C	A_23_P18739	-0.790712	1.02842e-05						A_24_P127159	-0.795729	5.0469e-06
		cancer/testis antigen family 45, member A1	CT45A1	A_32_P780817	-0.619446	1.62718e-05				phospholipase D family, member 6	PLD6	A_23_P360626	0.594604	1.7408e-05				c-fos induced growth factor (vascular endothelial growth factor D)	FIGF	A_23_P45185	-0.604245	0.00106255						A_24_P375683	-0.795419	0.0101438				FIG4 homolog, SAC1 lipid phosphatase domain containing (S. cerevisiae)	FIG4	A_23_P145541	-0.790592	1.78342e-05				splicing factor 3b, subunit 2, 145kDa	SF3B2	A_23_P64083	-0.794545	4.89751e-05
		keratin 18 pseudogene 55	KRT18P55	A_23_P373708	-0.619372	0.00537439				ATPase family, AAA domain containing 2B	ATAD2B	A_32_P191004	0.595163	0.00155682				WD repeat domain 12	WDR12	A_23_P28625	-0.603498	0.000444368				differentially expressed in FDCP 8 homolog (mouse)	DEF8	A_23_P88893	-0.794	5.53298e-07				coatomer protein complex, subunit gamma 2	COPG2	A_23_P61280	-0.790074	8.03191e-07				calpain 5	CAPN5	A_33_P3393170	-0.793686	0.000183491
				A_33_P3374170	-0.618562	2.14026e-05					XLOC_004258	A_21_P0004208	0.595195	0.00134623				ribosomal protein S14	RPS14	A_23_P81492	-0.602501	0.00030815				proteasome (prosome, macropain) 26S subunit, non-ATPase, 14	PSMD14	A_19_P00805273	-0.793256	2.28452e-05				heat shock protein 90kDa alpha (cytosolic), class B member 1	HSP90AB1	A_23_P145089	-0.788977	1.77099e-05				H3 histone, family 3B (H3.3B)	H3F3B	A_33_P3410194	-0.793642	1.047e-05
		RAD23 homolog B (S. cerevisiae)	RAD23B	A_33_P3312039	-0.618444	0.00589376				TSC22 domain family, member 2	TSC22D2	A_23_P92230	0.595306	0.00641785					FAM200B	A_19_P00322856	-0.602138	0.000992183				long intergenic non-protein coding RNA 473	LINC00473	A_33_P3394272	-0.793248	0.000379665				NOP2/Sun domain family, member 4	NSUN4	A_33_P3242264	-0.788033	1.23151e-05				hydroxysteroid dehydrogenase like 1	HSDL1	A_23_P206324	-0.793369	4.11268e-05
		Werner helicase interacting protein 1	WRNIP1	A_24_P192197	-0.618408	8.96733e-05				FERM domain containing 6	FRMD6	A_24_P330303	0.595357	0.00253875				transmembrane protein 25	TMEM25	A_23_P203115	-0.60142	0.000267766				chromobox homolog 5	CBX5	A_23_P2355	-0.792879	0.000124543				THAP domain containing 4	THAP4	A_23_P84782	-0.787661	6.74863e-06				ATPase, Ca++ transporting, ubiquitous	ATP2A3	A_23_P207632	-0.791798	3.75697e-05
		fucosyltransferase 11 (alpha (1,3) fucosyltransferase)	FUT11	A_23_P413788	-0.618086	3.59948e-05				zinc finger protein 2	ZNF2	A_23_P142969	0.596178	0.00138744				histone deacetylase 8	HDAC8	A_23_P84922	-0.599178	0.000363239				cyclin-dependent kinase inhibitor 1B (p27, Kip1)	CDKN1B	A_23_P204696	-0.792616	0.000926963				histone cluster 1, H1b	HIST1H1B	A_23_P250385	-0.787637	0.00138857				MAX-like protein X	MLX	A_19_P00810045	-0.790524	1.89149e-05
			XLOC_006390	A_21_P0005486	-0.617988	8.87595e-05				ring finger protein 138 pseudogene 1	RNF138P1	A_33_P3413541	0.596275	0.00053035						A_33_P3359869	-0.598562	0.00347611					XLOC_005473	A_21_P0004944	-0.791432	0.000113759				basic transcription factor 3 pseudogene 11	BTF3P11	A_23_P105900	-0.787286	1.38801e-06				stress-associated endoplasmic reticulum protein 1	SERP1	A_23_P91919	-0.789413	3.04498e-07
		family with sequence similarity 185, member A	FAM185A	A_24_P272548	-0.617977	0.0013181				UTP23, small subunit (SSU) processome component, homolog (yeast)	UTP23	A_23_P157679	0.596835	0.000468674						A_33_P3339011	-0.598488	0.00427598				cancer/testis antigen family 45, member A5	CT45A5	A_32_P170547	-0.789014	8.42072e-06				homeobox containing 1	HMBOX1	A_33_P3276638	-0.785427	0.000252599				bromodomain and WD repeat domain containing 3	BRWD3	A_32_P489130	-0.789158	3.08601e-05
		glucuronidase, beta pseudogene 1	GUSBP1	A_24_P332739	-0.617671	0.00263047					XLOC_003245	A_21_P0002876	0.597317	0.0118507				solute carrier family 9 (sodium/hydrogen exchanger), member 4	SLC9A4	A_33_P3396270	-0.597622	5.9723e-05				leucyl/cystinyl aminopeptidase	LNPEP	A_23_P144677	-0.788282	0.000249725				nuclear transport factor 2-like	LOC128322	A_33_P3399718	-0.782198	2.18421e-06				S-phase kinase-associated protein 2 (p45)	SKP2	A_23_P156310	-0.788984	1.18537e-06
		transmembrane protein 117	TMEM117	A_23_P2573	-0.616878	0.000211812				TATA box binding protein (TBP)-associated factor, RNA polymerase I, D, 41kDa	TAF1D	A_24_P261383	0.597796	0.00239396						A_33_P3350232	-0.59698	0.000998207				zinc finger protein 3	ZNF3	A_23_P219084	-0.788063	0.000133275				K(lysine) acetyltransferase 2B	KAT2B	A_32_P159651	-0.782163	9.36009e-05				SWI5 recombination repair homolog (yeast)	SWI5	A_23_P392222	-0.788866	4.66795e-07
		NIF3 NGG1 interacting factor 3-like 1 (S. cerevisiae)	NIF3L1	A_33_P3255766	-0.616528	0.00172108				claudin 1	CLDN1	A_23_P57784	0.597872	0.00633803				uncharacterized LOC152742	LOC152742	A_19_P00808586	-0.596919	0.00124672				NOP2/Sun domain family, member 4	NSUN4	A_33_P3242264	-0.787321	1.24349e-05				NIMA (never in mitosis gene a)-related kinase 1	NEK1	A_23_P124427	-0.781293	0.000184032				syntaxin binding protein 6 (amisyn)	STXBP6	A_24_P10214	-0.788423	2.53622e-06
		coiled-coil and C2 domain containing 2A	CC2D2A	A_23_P413285	-0.616065	0.00678745				SH3-domain binding protein 4	SH3BP4	A_33_P3271121	0.598074	0.000100149				chromosome 17 open reading frame 107	C17orf107	A_33_P3272948	-0.596763	0.00186861				RAB GTPase activating protein 1-like	RABGAP1L	A_24_P49349	-0.785701	1.47171e-06				Werner helicase interacting protein 1	WRNIP1	A_24_P192197	-0.778419	8.36079e-06				neuroblastoma RAS viral (v-ras) oncogene homolog	NRAS	A_33_P3317825	-0.788247	1.03429e-05
			XLOC_014368	A_21_P0010335	-0.615784	0.000177366				myoneurin	MYNN	A_24_P268786	0.59827	0.000478944				uncharacterized LOC257396	LOC257396	A_21_P0004503	-0.596102	0.000245236				mitogen-activated protein kinase 8	MAPK8	A_33_P3250289	-0.782937	4.43019e-05				caveolin 2	CAV2	A_24_P925040	-0.778336	0.000178265				leucine rich repeat containing 8 family, member A	LRRC8A	A_23_P250274	-0.788137	3.32254e-07
		NADH dehydrogenase (ubiquinone) Fe-S protein 6, 13kDa (NADH-coenzyme Q reductase)	NDUFS6	A_23_P122228	-0.615617	1.03313e-05				cytohesin 1	CYTH1	A_23_P83781	0.598347	6.45743e-05				uncharacterized LOC100287628	LOC100287628	A_19_P00805833	-0.595968	0.000388696				cofilin 1 (non-muscle)	CFL1	A_23_P35820	-0.780595	7.5304e-05				KH domain containing, RNA binding, signal transduction associated 3	KHDRBS3	A_33_P3394727	-0.773675	0.00213211				actinin, alpha 1	ACTN1	A_23_P105957	-0.787988	0.000907994
		Yip1 domain family, member 5	YIPF5	A_24_P328969	-0.615255	0.00150006				Mab-21 domain containing 2	MB21D2	A_32_P117464	0.598381	2.84953e-05						A_33_P3241596	-0.595442	0.013068						A_33_P3235184	-0.780324	0.000399087				calpain 5	CAPN5	A_33_P3393170	-0.771369	0.000238375				NOP2/Sun domain family, member 4	NSUN4	A_33_P3242264	-0.786895	1.25072e-05
		thymidylate synthetase	TYMS	A_23_P50096	-0.613387	0.000109211				zinc finger protein 180	ZNF180	A_23_P89921	0.59977	0.000205295				cytochrome P450, family 2, subfamily R, polypeptide 1	CYP2R1	A_23_P202860	-0.595213	0.000166826				basic transcription factor 3	BTF3	A_24_P183264	-0.778049	3.72061e-06				protein kinase, cAMP-dependent, regulatory, type II, beta	PRKAR2B	A_23_P42975	-0.76937	1.11026e-05				MTERF domain containing 2	MTERFD2	A_33_P3316313	-0.786845	6.678e-05
		uncharacterized LOC257396	LOC257396	A_21_P0004503	-0.613291	0.000189036				zinc finger protein 672	ZNF672	A_33_P3391429	0.600145	0.00123675				NIMA (never in mitosis gene a)-related kinase 1	NEK1	A_23_P124427	-0.594844	0.00182277				coiled-coil and C2 domain containing 1A	CC2D1A	A_23_P55873	-0.777801	2.745e-05				RNA binding motif protein, X-linked	RBMX	A_32_P56392	-0.767217	6.21039e-06				uncharacterized LOC100128239	LOC100128239	A_33_P3394978	-0.785334	0.000619828
			XLOC_l2_001134	A_21_P0010778	-0.613136	0.0018991				queuine tRNA-ribosyltransferase domain containing 1	QTRTD1	A_23_P91930	0.60075	3.27725e-05				mitochondrial intermediate peptidase	MIPEP	A_23_P117274	-0.593564	0.000952857				hook homolog 1 (Drosophila)	HOOK1	A_33_P3409844	-0.777753	0.000390054				general transcription factor IIE, polypeptide 2, beta 34kDa	GTF2E2	A_23_P94118	-0.766416	0.00278084				chondroitin polymerizing factor 2	CHPF2	A_23_P397055	-0.782932	0.000136406
		glutamate receptor, metabotropic 4	GRM4	A_33_P3282390	-0.613124	0.000557156				uncharacterized LOC401149	FLJ14186	A_24_P691775	0.600798	0.000312882					XLOC_l2_014048	A_21_P0013456	-0.59198	0.00205409				solute carrier family 25 (carnitine/acylcarnitine translocase), member 20	SLC25A20	A_23_P72025	-0.777696	0.000456402				CCR4-NOT transcription complex, subunit 6	CNOT6	A_24_P940125	-0.76278	1.25104e-05						A_33_P3252491	-0.777975	0.00372481
		major histocompatibility complex, class I-related	MR1	A_23_P74928	-0.61306	0.0030152				SET domain containing (lysine methyltransferase) 7	SETD7	A_33_P3255229	0.600922	0.000171797				cerebellar degeneration-related protein 2, 62kDa	CDR2	A_24_P339071	-0.591249	2.05002e-05				TM2 domain containing 1	TM2D1	A_23_P148959	-0.777275	5.68458e-06				transmembrane protein 147	TMEM147	A_23_P79043	-0.762258	4.30659e-06				TM2 domain containing 1	TM2D1	A_23_P148959	-0.7767	5.73115e-06
		Leo1, Paf1/RNA polymerase II complex component, homolog (S. cerevisiae)	LEO1	A_33_P3270109	-0.61291	0.0012843						A_33_P3222243	0.600962	0.000112049				BCL6 corepressor	BCOR	A_23_P405707	-0.591164	0.000433576				surfeit 2	SURF2	A_23_P146479	-0.776664	0.000212018				cyclin-dependent kinase inhibitor 1B (p27, Kip1)	CDKN1B	A_23_P204696	-0.761394	0.00127678				dynein, cytoplasmic 1, light intermediate chain 2	DYNC1LI2	A_33_P3374758	-0.775893	0.00217377
		ATPase, H+ transporting, lysosomal 50/57kDa, V1 subunit H	ATP6V1H	A_24_P363679	-0.612011	0.000223264				T-box 2	TBX2	A_23_P164451	0.60111	0.00149188						A_33_P3219454	-0.589375	0.0029438				stomatin (EPB72)-like 2	STOML2	A_24_P338145	-0.776569	0.00045866						A_24_P256063	-0.759012	0.000228351				cytochrome b5 type A (microsomal)	CYB5A	A_33_P3311076	-0.775082	1.00245e-05
		NADH dehydrogenase (ubiquinone) 1 beta subcomplex, 9, 22kDa	NDUFB9	A_24_P154006	-0.61165	0.000202792				nuclear factor of kappa light polypeptide gene enhancer in B-cells inhibitor, beta	NFKBIB	A_23_P330895	0.601543	0.000923075				FK506 binding protein 2, 13kDa	FKBP2	A_33_P3273020	-0.588958	7.00797e-05				BCS1-like (S. cerevisiae)	BCS1L	A_23_P154086	-0.775846	3.88048e-05				muscleblind-like 2 (Drosophila)	MBNL2	A_33_P3391076	-0.756991	0.000177408				solute carrier family 9 (sodium/hydrogen exchanger), member 4	SLC9A4	A_33_P3333050	-0.771527	1.08337e-05
			XLOC_014097	A_21_P0010322	-0.611072	0.00975111				retinoic acid receptor, alpha	RARA	A_32_P5251	0.601638	0.000172121				IDI2 antisense RNA 1 (non-protein coding)	IDI2-AS1	A_23_P24275	-0.588708	0.00260468				leucine rich repeat containing 49	LRRC49	A_33_P3344399	-0.775685	5.15039e-06				resistance to inhibitors of cholinesterase 8 homolog A (C. elegans)	RIC8A	A_24_P115971	-0.753282	4.11614e-05				RNA binding protein with multiple splicing	RBPMS	A_23_P71316	-0.770088	2.59913e-06
		aspartic peptidase, retroviral-like 1	ASPRV1	A_23_P417383	-0.611058	2.53045e-05				microcephalin 1	MCPH1	A_21_P0000087	0.601726	4.94447e-05						A_24_P186944	-0.588671	0.000369667				tRNA methyltransferase 11 homolog (S. cerevisiae)	TRMT11	A_24_P89509	-0.772947	0.000514909						A_33_P3235184	-0.750572	0.000557777				transmembrane protein 208	TMEM208	A_33_P3335629	-0.769423	3.69112e-06
		wingless-type MMTV integration site family, member 5A	WNT5A	A_33_P3341499	-0.610505	0.0015774				zinc finger protein 441	ZNF441	A_33_P3397323	0.60193	0.00170631				long intergenic non-protein coding RNA 478	LINC00478	A_33_P3312384	-0.588113	0.00246776				exocyst complex component 4	EXOC4	A_24_P7946	-0.77256	2.72701e-05				BRCA1/BRCA2-containing complex, subunit 3	BRCC3	A_33_P3385461	-0.74877	0.000999785				serpin peptidase inhibitor, clade B (ovalbumin), member 8	SERPINB8	A_24_P147461	-0.769233	0.00128554
		NADH dehydrogenase (ubiquinone) 1 alpha subcomplex, 13	NDUFA13	A_23_P119627	-0.609838	6.08488e-05				histone cluster 2, H2aa4	HIST2H2AA4	A_23_P309381	0.602933	0.00634372					XLOC_011837	A_21_P0009119	-0.58733	0.00868725				caveolin 2	CAV2	A_24_P925040	-0.772506	0.000191113				Vpr (HIV-1) binding protein	VPRBP	A_24_P26177	-0.748744	0.000311929				allograft inflammatory factor 1-like	AIF1L	A_33_P3260026	-0.767593	0.000191922
		zinc finger protein 511	ZNF511	A_33_P3384885	-0.608463	0.00420513				Ras association (RalGDS/AF-6) and pleckstrin homology domains 1	RAPH1	A_24_P924862	0.604523	0.00344553				uncharacterized LOC254057	LOC254057	A_33_P3613516	-0.58724	0.000728231				family with sequence similarity 82, member A2	FAM82A2	A_33_P3375234	-0.771686	2.80689e-05				bromodomain and WD repeat domain containing 3	BRWD3	A_32_P489130	-0.748534	5.27368e-05				canopy 4 homolog (zebrafish)	CNPY4	A_23_P157038	-0.767353	0.00107425
		basic transcription factor 3	BTF3	A_24_P183264	-0.607375	5.17446e-05				zinc finger protein 530	ZNF530	A_33_P3299421	0.604919	0.00010389				glucuronidase, beta pseudogene	LOC100133050	A_32_P39003	-0.587214	0.000453917				KH domain containing, RNA binding, signal transduction associated 3	KHDRBS3	A_33_P3394727	-0.769948	0.00220946				piggyBac transposable element derived 4	PGBD4	A_23_P420334	-0.747464	3.79761e-05				K(lysine) acetyltransferase 2B	KAT2B	A_32_P159651	-0.766206	0.000114118
				A_33_P3235184	-0.606346	0.00294648				zinc finger protein 584	ZNF584	A_23_P414964	0.606225	0.000235412				small G protein signaling modulator 2	SGSM2	A_33_P3333033	-0.586817	0.00730409				A kinase (PRKA) anchor protein 8-like	AKAP8L	A_23_P153767	-0.769823	6.63849e-05				TBC1 domain family, member 7	TBC1D7	A_33_P3311907	-0.744851	1.56489e-05				uncharacterized LOC100128851	LOC100128851	A_33_P3411885	-0.765623	3.61626e-06
		chromosome 20 open reading frame 30	C20orf30	A_24_P341019	-0.60631	1.559e-05				phosphatidylinositol 4-kinase type 2 alpha	PI4K2A	A_24_P244162	0.606871	6.42549e-05				vasohibin 1	VASH1	A_23_P77000	-0.586754	0.00113271				solute carrier family 1 (glial high affinity glutamate transporter), member 3	SLC1A3	A_21_P0000065	-0.769404	0.0010759				dynein, light chain, Tctex-type 3	DYNLT3	A_24_P100368	-0.744384	0.0025275				glucuronidase, beta pseudogene 1	GUSBP1	A_24_P332739	-0.764911	0.000485384
		LIM domain only 4	LMO4	A_33_P3298425	-0.606151	0.000298841					XLOC_l2_007433	A_21_P0011819	0.607074	0.00276949				TM2 domain containing 1	TM2D1	A_23_P148959	-0.586195	0.000105481				chromosome alignment maintaining phosphoprotein 1	CHAMP1	A_23_P164559	-0.768666	4.78136e-05				ASF1 anti-silencing function 1 homolog B (S. cerevisiae)	ASF1B	A_23_P119254	-0.744343	6.39659e-06				THO complex 3	THOC3	A_33_P3336642	-0.764482	4.28346e-05
		tetratricopeptide repeat domain 28	TTC28	A_32_P100683	-0.605017	0.000120454				bromodomain containing 4	BRD4	A_33_P3373745	0.608456	8.757e-06				aspartic peptidase, retroviral-like 1	ASPRV1	A_23_P417383	-0.585618	3.91571e-05				ATP synthase, H+ transporting, mitochondrial Fo complex, subunit C1 (subunit 9)	ATP5G1	A_23_P164228	-0.768634	1.73986e-06				dedicator of cytokinesis 10	DOCK10	A_23_P16722	-0.7435	2.40347e-06				transmembrane phosphatase with tensin homology	TPTE	A_33_P3247392	-0.763982	0.000159252
		RAB37, member RAS oncogene family	RAB37	A_33_P3314594	-0.604634	0.000144756				uncharacterized LOC731275	LOC731275	A_21_P0011029	0.610006	0.000436498				H3 histone, family 3B (H3.3B)	H3F3B	A_33_P3410194	-0.585574	0.000218915				family with sequence similarity 105, member A	FAM105A	A_23_P133438	-0.767323	4.87862e-05				chromosome 21 open reading frame 119	C21orf119	A_23_P29029	-0.743374	0.000202817				procollagen C-endopeptidase enhancer 2	PCOLCE2	A_23_P57709	-0.76278	1.81313e-05
		zinc finger protein 138	ZNF138	A_23_P59855	-0.604538	0.00341556				ArfGAP with RhoGAP domain, ankyrin repeat and PH domain 2	ARAP2	A_32_P83784	0.610019	7.42322e-05				HRAS-like suppressor family, member 5	HRASLS5	A_23_P416314	-0.585417	0.00163724						A_33_P3413353	-0.766266	9.403e-05				basic transcription factor 3	BTF3	A_24_P183264	-0.74272	6.23258e-06				cell division cycle 16 homolog (S. cerevisiae)	CDC16	A_33_P3392325	-0.759427	4.04537e-05
		forkhead box D4	FOXD4	A_32_P119248	-0.604526	0.000398939				headcase homolog (Drosophila)	HECA	A_23_P59349	0.610451	1.07504e-05						A_33_P3519223	-0.585251	0.0121206				RAD54-like 2 (S. cerevisiae)	RAD54L2	A_23_P18205	-0.765165	9.07462e-06				nuclear transport factor 2	NUTF2	A_23_P118038	-0.742258	3.07299e-06				leucine rich repeat containing 49	LRRC49	A_33_P3344399	-0.758475	6.59618e-06
		divergent-paired related homeobox pseudogene 4	DPRXP4	A_33_P3306048	-0.604206	0.000185727				zinc finger protein 787	ZNF787	A_23_P78835	0.610494	0.000736959				zinc finger protein 841	ZNF841	A_23_P27404	0.5854	0.000220646				DiGeorge syndrome critical region gene 11	DGCR11	A_33_P3411357	-0.764513	8.0264e-06				TM2 domain containing 1	TM2D1	A_23_P148959	-0.74135	9.53582e-06				death-domain associated protein	DAXX	A_23_P122579	-0.754375	1.17122e-05
		eukaryotic translation initiation factor 2B, subunit 4 delta, 67kDa	EIF2B4	A_23_P154058	-0.603949	0.00513056				regulator of G-protein signaling 16	RGS16	A_23_P217845	0.610612	0.000614899				zinc finger protein 574	ZNF574	A_23_P89931	0.585473	0.000583524				neuroblastoma RAS viral (v-ras) oncogene homolog	NRAS	A_33_P3317825	-0.762076	1.48484e-05				PRP40 pre-mRNA processing factor 40 homolog A (S. cerevisiae)	PRPF40A	A_23_P16762	-0.741223	0.00059481				coiled-coil domain containing 53	CCDC53	A_23_P53567	-0.752785	6.23497e-06
		mitochondrial ribosomal protein S28	MRPS28	A_23_P169050	-0.603772	2.8741e-05				poly (ADP-ribose) polymerase family, member 6	PARP6	A_23_P163258	0.611391	0.00289853				chromosome 17 open reading frame 51	C17orf51	A_19_P00316404	0.58572	7.45519e-05				TBC1 domain family, member 7	TBC1D7	A_33_P3311907	-0.757698	1.30443e-05				copper chaperone for superoxide dismutase	CCS	A_23_P127475	-0.739802	1.06687e-05				coiled-coil and C2 domain containing 1A	CC2D1A	A_23_P55873	-0.750983	3.93252e-05
			SDIM1	A_21_P0014941	-0.603515	0.00677578				coiled-coil domain containing 88C	CCDC88C	A_23_P379945	0.612131	0.00425955				solute carrier family 19 (thiamine transporter), member 2	SLC19A2	A_23_P160466	0.586061	0.000610829				kinesin family member 1C	KIF1C	A_33_P3230709	-0.757688	2.24184e-06				interferon-induced protein with tetratricopeptide repeats 1	IFIT1	A_23_P52266	-0.739503	0.000405596				Cdc42 guanine nucleotide exchange factor (GEF) 9	ARHGEF9	A_24_P254551	-0.749943	0.000111501
		trinucleotide repeat containing 6C	TNRC6C	A_33_P3302428	-0.603381	0.00718091				phosphodiesterase 9A	PDE9A	A_33_P3419594	0.612207	0.00138552				inositol-trisphosphate 3-kinase C	ITPKC	A_24_P202567	0.587837	0.00224255				BTB (POZ) domain containing 7	BTBD7	A_23_P88184	-0.756884	0.000228352				Rho GTPase activating protein 28	ARHGAP28	A_23_P130359	-0.739178	0.000154265				uncharacterized LOC100506869	LOC100506869	A_21_P0014577	-0.749262	0.000533233
		allograft inflammatory factor 1-like	AIF1L	A_33_P3260026	-0.602905	0.00148821				kelch-like 18 (Drosophila)	KLHL18	A_24_P15043	0.612941	4.77616e-06				growth differentiation factor 1	GDF1	A_33_P3420816	0.588076	0.00060607				DEAD (Asp-Glu-Ala-Asp) box polypeptide 59	DDX59	A_24_P156886	-0.755395	7.78318e-06				BH3 interacting domain death agonist	BID	A_33_P3227041	-0.73873	0.000728858				phosphoglycerate mutase 1 (brain)	PGAM1	A_33_P3268334	-0.748349	0.00176686
		origin recognition complex, subunit 2	ORC2	A_33_P3381410	-0.602732	0.00670927				alanyl-tRNA synthetase	AARS	A_24_P172990	0.613169	0.00316569				SET and MYND domain containing 3	SMYD3	A_32_P103291	0.588853	0.000604432						A_24_P186986	-0.752587	1.05116e-06				motile sperm domain containing 3	MOSPD3	A_33_P3321946	-0.738479	0.000130577				chromosome 9 open reading frame 86	C9orf86	A_33_P3821660	-0.746401	4.68314e-05
		ribosomal protein L9	RPL9	A_23_P7066	-0.601428	0.00110851				Bardet-Biedl syndrome 12	BBS12	A_32_P235796	0.613266	9.58031e-05				zinc finger protein 557	ZNF557	A_32_P177097	0.589199	2.87056e-05				Shwachman-Bodian-Diamond syndrome pseudogene 1	SBDSP1	A_33_P3364205	-0.751026	0.000317451				transmembrane protein 208	TMEM208	A_33_P3335629	-0.73836	5.83595e-06					XLOC_005473	A_21_P0004944	-0.744677	0.000201399
		cytochrome P450, family 26, subfamily A, polypeptide 1	CYP26A1	A_23_P138655	-0.600354	0.000997508				zinc finger protein 672	ZNF672	A_23_P83923	0.61348	1.00084e-05				interleukin 13 receptor, alpha 1	IL13RA1	A_24_P288685	0.589872	2.03813e-05				cancer/testis antigen family 45, member A1	CT45A1	A_32_P780817	-0.750506	1.9614e-06				actinin, alpha 1	ACTN1	A_23_P105957	-0.738126	0.00152197				actin related protein 2/3 complex, subunit 4, 20kDa	ARPC4	A_24_P20383	-0.743721	0.00011035
		transmembrane phosphatase with tensin homology	TPTE	A_33_P3247392	-0.600109	0.00127242				zinc finger protein 407	ZNF407	A_23_P208013	0.617336	0.00010995				nuclear receptor subfamily 4, group A, member 3	NR4A3	A_23_P398566	0.591369	0.000287933				calcium channel, voltage-dependent, alpha 2/delta subunit 3	CACNA2D3	A_33_P3373259	-0.74945	0.000104727				KIAA0368	KIAA0368	A_33_P3404286	-0.738087	6.04245e-06				N-acetylglucosamine kinase	NAGK	A_23_P154208	-0.742589	1.60875e-05
		suppression of tumorigenicity 7 like	ST7L	A_33_P3223239	-0.598897	5.26825e-06				homeobox B9	HOXB9	A_23_P27013	0.618277	0.00015197				chromosome 17 open reading frame 51	C17orf51	A_19_P00804596	0.591834	2.19449e-05				inositol-tetrakisphosphate 1-kinase	ITPK1	A_24_P167683	-0.749138	7.6367e-05				catenin (cadherin-associated protein), alpha-like 1	CTNNAL1	A_33_P3260605	-0.737485	6.29843e-05				SGT1, suppressor of G2 allele of SKP1 (S. cerevisiae)	SUGT1	A_24_P280706	-0.742327	8.53959e-07
		SH3-domain binding protein 4	SH3BP4	A_23_P79259	-0.597441	0.000404451				transcription factor binding to IGHM enhancer 3	TFE3	A_23_P84952	0.618496	0.000295407				chromosome 6 open reading frame 228	C6orf228	A_19_P00326732	0.592181	6.02134e-05				CCR4-NOT transcription complex, subunit 6	CNOT6	A_24_P940125	-0.748844	1.52282e-05				chloride channel 5	CLCN5	A_33_P3415087	-0.736694	2.69742e-06				general transcription factor IIE, polypeptide 2, beta 34kDa	GTF2E2	A_23_P94118	-0.742247	0.00348564
		H3 histone, family 3B (H3.3B)	H3F3B	A_33_P3410194	-0.597134	0.000182865				chromosome 17 open reading frame 51	C17orf51	A_19_P00804596	0.618672	1.37415e-05						A_33_P3321923	0.592343	0.0028798				KIAA0368	KIAA0368	A_33_P3404286	-0.748609	5.16793e-06				wntless homolog (Drosophila)	WLS	A_33_P3280721	-0.736109	0.000164356				mitogen-activated protein kinase 3	MAPK3	A_23_P37910	-0.742131	4.94868e-06
		small nucleolar RNA host gene 7 (non-protein coding)	SNHG7	A_24_P352116	-0.596665	0.000388309				small nucleolar RNA host gene 8 (non-protein coding)	SNHG8	A_32_P38467	0.618757	0.000252938				ring finger protein 169	RNF169	A_23_P350172	0.59242	0.000334447				transmembrane protein 184C	TMEM184C	A_23_P18739	-0.747019	1.88467e-05				fibroblast growth factor binding protein 1	FGFBP1	A_23_P30126	-0.735634	1.01405e-06				ribosomal protein L9	RPL9	A_23_P7066	-0.741928	0.000181459
		DnaJ (Hsp40) homolog, subfamily A, member 1	DNAJA1	A_24_P9671	-0.596159	0.00137206				E2F transcription factor 2	E2F2	A_23_P408955	0.619114	5.41167e-05				UDP-glucose glycoprotein glucosyltransferase 2	UGGT2	A_23_P204980	0.592818	0.00362398				piggyBac transposable element derived 4	PGBD4	A_23_P420334	-0.745132	3.92013e-05				protein arginine methyltransferase 1	PRMT1	A_23_P39088	-0.735413	0.000244653				importin 7	IPO7	A_32_P186226	-0.741659	0.00147531
		ribosomal protein S17	RPS17	A_24_P418418	-0.595371	0.000163634				chromatin licensing and DNA replication factor 1	CDT1	A_33_P3386262	0.619705	3.84119e-05				bone morphogenetic protein 2	BMP2	A_33_P3237150	0.593083	1.20801e-05				neuregulin 1	NRG1	A_33_P3284345	-0.743781	0.00106883				kinesin family member 1C	KIF1C	A_33_P3230709	-0.734999	3.16311e-06				zinc finger protein 326	ZNF326	A_33_P3301689	-0.740696	1.16356e-06
				A_24_P358131	-0.594865	0.0156595				low density lipoprotein receptor-related protein 5-like	LRP5L	A_33_P3326545	0.620739	8.65683e-05				zinc finger protein 345	ZNF345	A_33_P3318596	0.593293	0.000599003				netrin 4	NTN4	A_23_P204630	-0.741724	0.000927967				LysM, putative peptidoglycan-binding, domain containing 4	LYSMD4	A_23_P117734	-0.734887	1.13115e-05				motile sperm domain containing 3	MOSPD3	A_23_P111492	-0.739768	5.89242e-05
		intraflagellar transport 122 homolog (Chlamydomonas)	IFT122	A_23_P212447	-0.594858	0.000102763				regulatory factor X, 1 (influences HLA class II expression)	RFX1	A_24_P391104	0.620913	0.000641039				uncharacterized LOC728323	LOC728323	A_32_P180971	0.593387	0.000395036				trafficking protein particle complex 4	TRAPPC4	A_23_P127613	-0.740912	1.17867e-05				chromosome 20 open reading frame 111	C20orf111	A_23_P79818	-0.734655	0.000123255				piggyBac transposable element derived 4	PGBD4	A_23_P420334	-0.738553	4.28869e-05
			XLOC_000350	A_21_P0001365	-0.594729	0.00288073				zinc finger and BTB domain containing 43	ZBTB43	A_33_P3349414	0.621088	0.000362583				unc-51-like kinase 1 (C. elegans)	ULK1	A_24_P73370	0.594331	0.000494877				tetratricopeptide repeat domain 28	TTC28	A_32_P100683	-0.739791	1.58762e-05				proteasome (prosome, macropain) 26S subunit, non-ATPase, 14	PSMD14	A_19_P00805273	-0.73384	5.06453e-05				chromosome 20 open reading frame 111	C20orf111	A_23_P79818	-0.737494	0.000118811
			XLOC_l2_014711	A_21_P0013556	-0.594267	0.000715542				zinc finger protein 284	ZNF284	A_33_P3221432	0.621228	0.00191588				surfeit 6	SURF6	A_24_P21447	0.594865	5.95962e-05				chromosome 4 open reading frame 27	C4orf27	A_24_P49371	-0.738931	0.000875738				leucyl/cystinyl aminopeptidase	LNPEP	A_23_P144677	-0.732772	0.000476004				aquarius homolog (mouse)	AQR	A_24_P280378	-0.735457	2.32945e-05
				A_33_P3238225	-0.593708	0.000280388						A_32_P840463	0.622439	1.82391e-05				coiled-coil domain containing 130	CCDC130	A_23_P101461	0.595327	0.000476401				Tax1 (human T-cell leukemia virus type I) binding protein 1	TAX1BP1	A_24_P95029	-0.738603	2.35318e-06				eukaryotic elongation factor, selenocysteine-tRNA-specific	EEFSEC	A_23_P144202	-0.73096	0.00127449				zinc finger, DHHC-type containing 12	ZDHHC12	A_23_P158007	-0.734006	0.000247725
				A_33_P3326151	-0.593595	0.00110529				UHRF1 binding protein 1	UHRF1BP1	A_33_P3313421	0.623168	3.19257e-05				inositol 1,4,5-trisphosphate receptor interacting protein	ITPRIP	A_23_P340333	0.595537	0.00187436				myosin, light chain 9, regulatory	MYL9	A_23_P210425	-0.737761	1.50245e-05				chromobox homolog 5	CBX5	A_23_P2355	-0.7308	0.000265034				basic transcription factor 3	BTF3	A_24_P183264	-0.733109	7.18996e-06
		chromosome 16 open reading frame 55	C16orf55	A_32_P107493	-0.59319	0.00052922				GATA binding protein 3	GATA3	A_33_P3360341	0.623959	3.30316e-05				regulator of G-protein signaling 16	RGS16	A_23_P217845	0.596078	0.000751715				heat shock protein 90kDa alpha (cytosolic), class B member 1	HSP90AB1	A_23_P145089	-0.73699	3.59234e-05				THO complex 5	THOC5	A_23_P109470	-0.730667	0.00428555				dedicator of cytokinesis 10	DOCK10	A_23_P16722	-0.730573	2.93159e-06
		small nucleolar RNA, C/D box 60	SNORD60	A_21_P0000280	-0.592619	0.021721				myosin, heavy chain 9, non-muscle	MYH9	A_24_P408424	0.624726	0.00109066				zinc finger protein 837	ZNF837	A_33_P3411427	0.596375	0.000325952				DnaJ (Hsp40) homolog, subfamily C, member 13	DNAJC13	A_23_P166910	-0.736646	0.000238673						A_32_P31992	-0.730564	1.03135e-06				calmodulin binding transcription activator 1	CAMTA1	A_21_P0000131	-0.730192	2.16537e-05
		FK506 binding protein 1A, 12kDa	FKBP1A	A_24_P160001	-0.592499	9.40314e-06				tripartite motif containing 39	TRIM39	A_24_P89413	0.624791	3.71706e-05				v-rel reticuloendotheliosis viral oncogene homolog (avian)	REL	A_23_P56938	0.596858	0.000188013					LOC100507239	A_21_P0014119	-0.736455	2.74463e-05						A_23_P25069	-0.72648	0.000790788				AVL9 homolog (S. cerevisiase)	AVL9	A_24_P272967	-0.729984	0.000827126
		twinfilin, actin-binding protein, homolog 2 (Drosophila)	TWF2	A_23_P121265	-0.589781	0.000273098				protein phosphatase, Mg2+/Mn2+ dependent, 1D	PPM1D	A_33_P3302696	0.624887	0.00450954				WW domain containing transcription regulator 1	WWTR1	A_23_P29769	0.600262	0.000391007				neuregulin 1	NRG1	A_23_P315815	-0.735394	5.13858e-05				carbamoyl-phosphate synthetase 2, aspartate transcarbamylase, and dihydroorotase	CAD	A_23_P40049	-0.720445	0.000998219				coiled-coil domain containing 25	CCDC25	A_23_P71300	-0.728064	1.58849e-06
		6-phosphofructo-2-kinase/fructose-2,6-biphosphatase 2	PFKFB2	A_33_P3300635	-0.588838	0.000346215				zinc finger protein 543	ZNF543	A_32_P139229	0.625157	1.00615e-05					XLOC_013282	A_19_P00804777	0.600398	0.000685023				mitochondrial ribosomal protein L46	MRPL46	A_32_P209989	-0.735237	0.000253158				myeloid/lymphoid or mixed-lineage leukemia 3	MLL3	A_21_P0011931	-0.718921	0.000330177						A_19_P00319503	-0.72793	0.00072187
			XLOC_l2_009442	A_21_P0012331	-0.587294	0.00915928				uncharacterized LOC100133331	LOC100133331	A_33_P3287883	0.626009	0.000366885				zinc finger protein 425	ZNF425	A_24_P941166	0.601488	0.000171154				thymidylate synthetase	TYMS	A_23_P50096	-0.735158	1.76032e-05				major facilitator superfamily domain containing 9	MFSD9	A_33_P3272189	-0.718084	0.00409883				Fc fragment of IgE, high affinity I, receptor for; gamma polypeptide	FCER1G	A_23_P160849	-0.727151	0.00413214
				A_24_P49747	-0.587163	0.0112979				zinc finger protein 398	ZNF398	A_32_P151875	0.62646	0.000202564				protein phosphatase 6, catalytic subunit	PPP6C	A_23_P355385	0.601653	0.000128991				Leo1, Paf1/RNA polymerase II complex component, homolog (S. cerevisiae)	LEO1	A_23_P314222	-0.734277	0.000113981				leucine rich repeat containing 8 family, member A	LRRC8A	A_23_P250274	-0.717321	1.01028e-06				drebrin-like	DBNL	A_24_P43681	-0.72588	0.000208167
		cancer/testis antigen family 45, member A5	CT45A5	A_32_P170547	-0.586728	0.000169171				family with sequence similarity 122C	FAM122C	A_21_P0000080	0.626506	0.00518628				RecQ protein-like 5	RECQL5	A_33_P3268974	0.601727	2.17132e-05				aldehyde dehydrogenase 4 family, member A1	ALDH4A1	A_32_P192970	-0.733695	4.48162e-05				mirror-image polydactyly 1	MIPOL1	A_33_P3335228	-0.716954	0.000942449				ribosomal RNA processing 15 homolog (S. cerevisiae)	RRP15	A_23_P23356	-0.72293	0.000796459
		protocadherin beta 2	PCDHB2	A_23_P213375	-0.585972	0.000963694				ribosomal protein S29	RPS29	A_33_P3282840	0.626645	0.00196551				protein phosphatase, Mg2+/Mn2+ dependent, 1A	PPM1A	A_23_P409553	0.602063	2.90371e-05				H3 histone, family 3B (H3.3B)	H3F3B	A_33_P3410194	-0.733611	2.40908e-05				zinc finger protein 3	ZNF3	A_23_P219084	-0.716802	0.000318144				roundabout, axon guidance receptor, homolog 3 (Drosophila)	ROBO3	A_23_P87082	-0.722555	0.000167661
				A_19_P00315459	-0.585381	0.00440745				MORC family CW-type zinc finger 3	MORC3	A_23_P325501	0.627743	9.16313e-05				PMS2 postmeiotic segregation increased 2 (S. cerevisiae)	PMS2	A_23_P93792	0.602215	0.000102418				tripartite motif containing 27	TRIM27	A_24_P163405	-0.733092	0.000298486				uncharacterized LOC100128851	LOC100128851	A_33_P3411885	-0.716691	7.51246e-06				coiled-coil domain containing 58	CCDC58	A_32_P215113	-0.722065	0.00330537
		v-maf musculoaponeurotic fibrosarcoma oncogene homolog G (avian)	MAFG	A_23_P78209	0.585359	5.51453e-05				growth factor receptor-bound protein 10	GRB10	A_23_P122863	0.628576	1.12992e-05						A_32_P40375	0.602286	2.93479e-05						A_19_P00320948	-0.732929	7.34623e-05				uncharacterized LOC729013	LOC729013	A_21_P0007122	-0.716486	0.000303151				pseudouridylate synthase 3	PUS3	A_23_P13073	-0.721702	7.56701e-06
		tet methylcytosine dioxygenase 2	TET2	A_33_P3238690	0.585718	0.00982379				zinc finger protein, X-linked	ZFX	A_23_P125639	0.629495	9.62703e-05				adaptor-related protein complex 3, sigma 2 subunit	AP3S2	A_24_P287691	0.602894	0.000269226				tetratricopeptide repeat domain 35	TTC35	A_23_P60002	-0.732094	0.000696234				solute carrier family 10 (sodium/bile acid cotransporter family), member 7	SLC10A7	A_33_P3323048	-0.716443	0.000115543				phosphorylase kinase, gamma 2 (testis)	PHKG2	A_24_P296457	-0.721237	0.00010179
				A_33_P3264746	0.585936	0.00135688				zinc finger and BTB domain containing 40	ZBTB40	A_23_P387523	0.632165	3.59967e-05				WD repeat domain 74	WDR74	A_23_P36157	0.603213	0.000964414				WD repeat domain 12	WDR12	A_23_P28625	-0.73192	7.47125e-05				MTOR associated protein, LST8 homolog (S. cerevisiae)	MLST8	A_33_P3256054	-0.715969	2.395e-05				THAP domain containing 4	THAP4	A_23_P84782	-0.72081	1.75314e-05
		zinc finger protein 430	ZNF430	A_23_P56298	0.586167	0.000145031				chromosome 14 open reading frame 118	C14orf118	A_33_P3292812	0.633843	9.20508e-05				UHRF1 binding protein 1	UHRF1BP1	A_33_P3313421	0.603651	4.41355e-05				calcium/calmodulin-dependent protein kinase kinase 2, beta	CAMKK2	A_23_P408830	-0.731913	3.00402e-06				eukaryotic translation initiation factor 1A, X-linked	EIF1AX	A_33_P3361393	-0.715898	1.53892e-05				CCR4-NOT transcription complex, subunit 6	CNOT6	A_24_P940125	-0.720723	2.27812e-05
		TAF4b RNA polymerase II, TATA box binding protein (TBP)-associated factor, 105kDa	TAF4B	A_33_P3358626	0.586357	0.00113197				chromosome 19 open reading frame 44	C19orf44	A_23_P107801	0.635105	0.000115132				chromosome 1 open reading frame 135	C1orf135	A_23_P160537	0.60423	5.70043e-05				dynein, light chain, Tctex-type 3	DYNLT3	A_24_P100368	-0.730782	0.00288544				tropomyosin 1 (alpha)	TPM1	A_24_P44462	-0.715409	3.16211e-06				mitochondrial ribosomal protein L46	MRPL46	A_32_P209989	-0.720223	0.000304726
		vascular endothelial growth factor A	VEGFA	A_24_P12401	0.586539	0.00016235				CDC42 effector protein (Rho GTPase binding) 1	CDC42EP1	A_33_P3407424	0.635565	1.19335e-05				phosphofructokinase, muscle	PFKM	A_24_P98914	0.604815	0.000110221						A_32_P132477	-0.730777	2.93037e-05						A_33_P3275255	-0.715218	0.00190074				Vpr (HIV-1) binding protein	VPRBP	A_24_P26177	-0.720219	0.000438811
		BMP binding endothelial regulator	BMPER	A_33_P3219651	0.587207	0.00281074				OTU domain containing 7B	OTUD7B	A_33_P3358307	0.637347	1.8789e-05				chromosome 16 open reading frame 52	C16orf52	A_21_P0000053	0.604996	0.00113026						A_23_P25069	-0.730676	0.000754129				SGT1, suppressor of G2 allele of SKP1 (S. cerevisiae)	SUGT1	A_24_P280706	-0.714774	1.32585e-06				transferrin receptor (p90, CD71)	TFRC	A_23_P212617	-0.717005	0.00131267
		zinc finger, CCHC domain containing 3	ZCCHC3	A_24_P399694	0.587333	3.50446e-05				uncharacterized LOC100506392	LOC100506392	A_19_P00321183	0.637377	0.00048363				hairy and enhancer of split 4 (Drosophila)	HES4	A_33_P3342628	0.605602	0.000119561				small Cajal body-specific RNA 15	SCARNA15	A_21_P0008664	-0.729988	0.000141919				ornithine decarboxylase 1	ODC1	A_23_P165840	-0.713856	7.89875e-05				replication factor C (activator 1) 5, 36.5kDa	RFC5	A_23_P95302	-0.71684	0.000162393
		Ly6/neurotoxin 1	LYNX1	A_33_P3418194	0.588918	0.00578859				cyclin-dependent kinase 5, regulatory subunit 1 (p35)	CDK5R1	A_33_P3226985	0.638474	0.0061906				GrpE-like 2, mitochondrial (E. coli)	GRPEL2	A_23_P404091	0.606365	8.26522e-05						A_32_P31992	-0.729422	1.0503e-06						A_24_P647682	-0.7136	0.000164784				coiled-coil domain containing 28B	CCDC28B	A_23_P62764	-0.716002	2.1692e-06
		glycyl-tRNA synthetase	GARS	A_24_P154948	0.589075	0.000150853				cardiotrophin-like cytokine factor 1	CLCF1	A_23_P138760	0.638912	0.000121984				zinc finger protein 432	ZNF432	A_23_P208210	0.606455	3.43568e-05				Vpr (HIV-1) binding protein	VPRBP	A_24_P26177	-0.728552	0.000397015				chromosome 1 open reading frame 174	C1orf174	A_24_P298877	-0.712569	0.000303442				RNA binding motif protein, X-linked	RBMX	A_32_P56392	-0.71532	1.32718e-05
		nuclear receptor 2C2-associated protein	NR2C2AP	A_24_P126181	0.589408	0.000159567				uncharacterized LOC440028	LOC440028	A_33_P3833256	0.639137	3.418e-05				syntabulin (syntaxin-interacting)	SYBU	A_33_P3333054	0.606619	4.20115e-05				SMAD family member 2	SMAD2	A_32_P12580	-0.728445	0.000257396				GH3 domain containing	GHDC	A_23_P207387	-0.71212	0.000182721				ribosomal protein L13	RPL13	A_23_P501849	-0.714976	4.90614e-05
		zinc finger protein 839 pseudogene	LOC389906	A_33_P3325229	0.591098	0.00978187				ribosomal RNA processing 8, methyltransferase, homolog (yeast)	RRP8	A_23_P356565	0.640325	0.000546286				ELK3, ETS-domain protein (SRF accessory protein 2)	ELK3	A_23_P338325	0.606687	0.00633643				uncharacterized LOC100128851	LOC100128851	A_33_P3411885	-0.728362	6.2934e-06				BTB (POZ) domain containing 7	BTBD7	A_23_P88184	-0.711816	0.0003951				WD repeat domain 12	WDR12	A_23_P28625	-0.714668	9.42464e-05
		uncharacterized LOC401149	FLJ14186	A_32_P213637	0.591737	0.000165779				four and a half LIM domains 2	FHL2	A_33_P3362321	0.640659	1.85125e-05				chromosome X open reading frame 61	CXorf61	A_23_P432352	0.606804	0.000800299				solute carrier family 35, member F2	SLC35F2	A_33_P3211229	-0.727755	1.40883e-05					Q39472	A_19_P00321317	-0.7109	0.000177051				charged multivesicular body protein 2A	CHMP2A	A_23_P153236	-0.714439	2.96461e-06
		polyhomeotic homolog 2 (Drosophila)	PHC2	A_23_P423864	0.592012	0.0023389				zinc finger protein 569	ZNF569	A_33_P3403773	0.640751	0.00149469				NADH dehydrogenase (ubiquinone) 1 alpha subcomplex, 6, 14kDa	NDUFA6	A_24_P23245	0.607056	0.00129759				transmembrane protein 50A	TMEM50A	A_24_P113824	-0.725963	7.98218e-06					XLOC_l2_002033	A_21_P0010888	-0.710325	2.02511e-05				CD19 molecule	CD19	A_23_P113572	-0.713113	0.00046201
		CDC42 effector protein (Rho GTPase binding) 1	CDC42EP1	A_33_P3407424	0.592817	2.48899e-05				v-maf musculoaponeurotic fibrosarcoma oncogene homolog K (avian)	MAFK	A_23_P373598	0.640772	2.83757e-05						A_32_P840463	0.607062	2.3701e-05				uncharacterized LOC100506965	LOC100506965	A_19_P00800681	-0.724681	0.000146254				ATP synthase, H+ transporting, mitochondrial Fo complex, subunit C1 (subunit 9)	ATP5G1	A_23_P164228	-0.709587	4.29728e-06				acyl-CoA synthetase long-chain family member 1	ACSL1	A_23_P110212	-0.713038	0.000242514
		phosphatidylinositol 4-kinase type 2 alpha	PI4K2A	A_24_P244162	0.593652	7.9783e-05				zinc finger protein 274	ZNF274	A_23_P153251	0.641122	7.17735e-05				zinc finger protein 263	ZNF263	A_23_P140978	0.607427	0.000714739				THO complex 5	THOC5	A_23_P109470	-0.722177	0.00463508					XLOC_002133	A_21_P0002454	-0.709538	1.41013e-05				tubulin, beta 4B class IVb	TUBB4B	A_23_P312863	-0.712353	8.42222e-06
		zinc finger protein 441	ZNF441	A_33_P3397323	0.593967	0.00188671				tripartite motif containing 35	TRIM35	A_23_P502553	0.641543	6.37253e-05				solute carrier family 16, member 6 (monocarboxylic acid transporter 7)	SLC16A6	A_23_P152791	0.607998	9.15842e-05				mitochondrial amidoxime reducing component 1	MARC1	A_33_P3293362	-0.721053	6.79083e-05						A_24_P127159	-0.708735	1.76673e-05				protein arginine methyltransferase 1	PRMT1	A_23_P39088	-0.712008	0.000327036
		ets variant 5	ETV5	A_32_P30649	0.595539	9.07072e-05				immediate early response 2	IER2	A_32_P36235	0.641644	1.1605e-05				topoisomerase (DNA) III alpha	TOP3A	A_23_P15829	0.608093	0.00109123						A_32_P514599	-0.71762	0.00106551				cellular retinoic acid binding protein 1	CRABP1	A_33_P3326483	-0.708524	4.39535e-05				chloride channel 5	CLCN5	A_33_P3415087	-0.711874	3.96619e-06
		LATS, large tumor suppressor, homolog 2 (Drosophila)	LATS2	A_24_P70002	0.595783	0.00139262				long intergenic non-protein coding RNA 338	LINC00338	A_19_P00810899	0.64165	0.00116367				insulin-like growth factor binding protein 1	IGFBP1	A_23_P42868	0.608153	1.5185e-05				copper chaperone for superoxide dismutase	CCS	A_23_P127475	-0.716312	1.50676e-05				drosha, ribonuclease type III	DROSHA	A_23_P133596	-0.70774	4.35802e-05				dihydrouridine synthase 2-like, SMM1 homolog (S. cerevisiae)	DUS2L	A_23_P88848	-0.709819	0.000259805
		solute carrier family 5 (sodium/glucose cotransporter), member 12	SLC5A12	A_23_P323943	0.596308	0.000350584				UPF1 regulator of nonsense transcripts homolog (yeast)	UPF1	A_24_P194154	0.642269	4.99028e-06				zinc finger protein 281	ZNF281	A_23_P311087	0.608209	3.98301e-05				K(lysine) acetyltransferase 2B	KAT2B	A_32_P159651	-0.715929	0.00021537						A_33_P3252491	-0.706156	0.00703495				neural precursor cell expressed, developmentally down-regulated 4-like	NEDD4L	A_24_P782308	-0.708753	9.12444e-06
		SMAD family member 7	SMAD7	A_23_P55518	0.596365	6.00289e-05				uncharacterized LOC728323	LOC728323	A_32_P180971	0.642345	0.000193766				v-maf musculoaponeurotic fibrosarcoma oncogene homolog K (avian)	MAFK	A_23_P373598	0.608284	4.82035e-05				syntaxin binding protein 6 (amisyn)	STXBP6	A_23_P205713	-0.715538	7.07175e-06				transmembrane protein 50A	TMEM50A	A_24_P113824	-0.705737	1.08412e-05				tubulin, alpha 1c	TUBA1C	A_24_P58529	-0.708399	0.000128134
		long intergenic non-protein coding RNA 339	LINC00339	A_21_P0010695	0.596733	0.000282893				dual specificity phosphatase 4	DUSP4	A_23_P134935	0.642894	6.82162e-05				DnaJ (Hsp40) homolog, subfamily B, member 2	DNAJB2	A_24_P102981	0.609214	0.000198021				nuclear receptor interacting protein 3	NRIP3	A_33_P3244956	-0.712017	0.00014568				cofilin 1 (non-muscle)	CFL1	A_23_P35820	-0.704355	0.000200037				sterol O-acyltransferase 1	SOAT1	A_24_P216654	-0.70821	7.15228e-05
		fibrosin	FBRS	A_33_P3329549	0.597411	0.0032994				zinc finger protein 527	ZNF527	A_23_P402000	0.644803	3.12913e-05				thioredoxin-like 4B	TXNL4B	A_24_P399083	0.609845	0.000415645				SMT3 suppressor of mif two 3 homolog 1 (S. cerevisiae)	SUMO1	A_24_P319354	-0.711849	0.00068682				ring finger protein 2	RNF2	A_23_P85543	-0.703176	0.000305945				long intergenic non-protein coding RNA 473	LINC00473	A_33_P3394272	-0.708139	0.000986246
		X-ray repair complementing defective repair in Chinese hamster cells 3	XRCC3	A_33_P3301524	0.598033	0.000289327				uncharacterized LOC401149	FLJ14186	A_32_P213637	0.644933	7.27027e-05				GINS complex subunit 3 (Psf3 homolog)	GINS3	A_23_P152136	0.610719	1.43391e-05				rabaptin, RAB GTPase binding effector protein 1	RABEP1	A_33_P3275998	-0.710621	0.000121843				E74-like factor 3 (ets domain transcription factor, epithelial-specific )	ELF3	A_23_P104188	-0.702718	0.00106197				adaptor protein, phosphotyrosine interaction, PH domain and leucine zipper containing 1	APPL1	A_23_P166663	-0.706896	0.000689816
		ATG2 autophagy related 2 homolog A (S. cerevisiae)	ATG2A	A_33_P3257312	0.598104	0.000729413					ZNF805	A_19_P00812349	0.645408	5.62319e-05				F-box protein 8	FBXO8	A_23_P136012	0.611576	0.000501777				zinc finger protein 486	ZNF486	A_24_P100016	-0.710398	0.000446887						A_19_P00320948	-0.700539	0.000113818				cerebral endothelial cell adhesion molecule	CERCAM	A_33_P3260575	-0.70585	0.000630435
		Wilms tumor 1 associated protein	WTAP	A_33_P3329098	0.598295	0.00479749				X-ray repair complementing defective repair in Chinese hamster cells 3	XRCC3	A_33_P3301524	0.645614	0.000143169				solute carrier family 25 (mitochondrial carrier; phosphate carrier), member 25	SLC25A25	A_24_P355267	0.61161	0.0181299				ISG15 ubiquitin-like modifier	ISG15	A_23_P819	-0.709533	0.000833269				chromosome 9 open reading frame 85	C9orf85	A_33_P3409506	-0.699061	8.68931e-05				A kinase (PRKA) anchor protein 8-like	AKAP8L	A_23_P153767	-0.705784	0.000153161
		Kruppel-like factor 9	KLF9	A_23_P415401	0.598523	7.23692e-05				zinc finger protein 566	ZNF566	A_23_P306956	0.646174	2.38108e-05				THAP domain containing, apoptosis associated protein 1	THAP1	A_23_P134814	0.611623	4.28253e-05				drosha, ribonuclease type III	DROSHA	A_23_P133596	-0.708167	4.33156e-05				myeloid/lymphoid or mixed-lineage leukemia 3	MLL3	A_33_P3321275	-0.698459	0.00067725				AVL9 homolog (S. cerevisiase)	AVL9	A_23_P122947	-0.704952	7.23591e-06
		Sp4 transcription factor	SP4	A_33_P3341716	0.598551	0.00098845						A_33_P3327208	0.646353	0.00238194				zinc finger protein 816	ZNF816	A_33_P3399019	0.611695	0.00019017				death-domain associated protein	DAXX	A_23_P122579	-0.7078	2.29871e-05				TAF9 RNA polymerase II, TATA box binding protein (TBP)-associated factor, 32kDa	TAF9	A_32_P90210	-0.698244	5.03419e-06				ubinuclein 1	UBN1	A_23_P54900	-0.703863	3.40932e-05
		glutamic-oxaloacetic transaminase 1, soluble (aspartate aminotransferase 1)	GOT1	A_23_P63825	0.598612	1.31769e-05				jumonji C domain containing histone demethylase 1 homolog D (S. cerevisiae)	JHDM1D	A_23_P359897	0.646558	5.80447e-05				peroxisome proliferator-activated receptor gamma	PPARG	A_23_P252062	0.611828	0.000406825				canopy 4 homolog (zebrafish)	CNPY4	A_23_P157038	-0.707175	0.0020167				BCS1-like (S. cerevisiae)	BCS1L	A_23_P154086	-0.696845	0.000111982				inositol-tetrakisphosphate 1-kinase	ITPK1	A_24_P167683	-0.703294	0.000140133
		RRN3 RNA polymerase I transcription factor homolog (S. cerevisiae)	RRN3	A_33_P3362770	0.600014	0.0104347				TATA box binding protein (TBP)-associated factor, RNA polymerase I, A, 48kDa	TAF1A	A_33_P3406245	0.647458	2.41999e-05				immediate early response 2	IER2	A_32_P36235	0.61307	1.8834e-05				elongation factor RNA polymerase II-like 3	ELL3	A_24_P47988	-0.705784	7.37721e-05				RPL36A-HNRNPH2 readthrough	RPL36A-HNRNPH2	A_33_P3255647	-0.696229	0.00267006				oxysterol binding protein-like 10	OSBPL10	A_23_P147245	-0.703041	2.25384e-06
		lin-52 homolog (C. elegans)	LIN52	A_23_P339309	0.600554	0.00107102				nuclear paraspeckle assembly transcript 1 (non-protein coding)	NEAT1	A_21_P0011024	0.647974	0.00162488				seven in absentia homolog 1 (Drosophila)	SIAH1	A_23_P106798	0.613153	8.66257e-05				mannosidase, endo-alpha	MANEA	A_23_P255663	-0.703306	0.00126076				uncharacterized LOC100506881	LOC100506881	A_21_P0014203	-0.695899	5.23183e-05						A_23_P258108	-0.697863	0.000260423
		zinc finger protein 816	ZNF816	A_33_P3399019	0.601268	0.000222706				BRF2, subunit of RNA polymerase III transcription initiation factor, BRF1-like	BRF2	A_23_P20480	0.648334	2.28815e-05				small nucleolar RNA host gene 7 (non-protein coding)	SNHG7	A_33_P3280927	0.613253	0.000665413				splicing factor 3b, subunit 2, 145kDa	SF3B2	A_23_P64083	-0.700517	0.000165902				Tax1 (human T-cell leukemia virus type I) binding protein 1	TAX1BP1	A_24_P95029	-0.694833	4.67655e-06				protein kinase (cAMP-dependent, catalytic) inhibitor gamma	PKIG	A_23_P91221	-0.695771	0.000325597
		solute carrier family 19 (thiamine transporter), member 2	SLC19A2	A_23_P160466	0.601274	0.000491236				zinc finger protein 281	ZNF281	A_23_P311087	0.649045	2.03739e-05				chromosome 6 open reading frame 211	C6orf211	A_33_P3294836	0.613527	0.00374337				MTERF domain containing 2	MTERFD2	A_33_P3316313	-0.69841	0.000207977				RNA binding protein with multiple splicing	RBPMS	A_23_P71316	-0.693003	8.38935e-06				nudix (nucleoside diphosphate linked moiety X)-type motif 16	NUDT16	A_23_P310560	-0.695484	3.39136e-05
		zinc finger protein 10	ZNF10	A_23_P203829	0.601497	8.60941e-05				H1 histone family, member X	H1FX	A_23_P96087	0.649096	0.000518625				KRI1 homolog (S. cerevisiae)	KRI1	A_23_P101332	0.614121	0.00132415				KIAA0494	KIAA0494	A_24_P233917	-0.696546	0.00029363				six transmembrane epithelial antigen of the prostate 1	STEAP1	A_24_P406334	-0.691852	0.0017133				myeloid/lymphoid or mixed-lineage leukemia 3	MLL3	A_21_P0011931	-0.694331	0.000447859
		uncharacterized LOC100128881	LOC100128881	A_33_P3294372	0.60185	0.000198706				chromosome 17 open reading frame 51	C17orf51	A_19_P00320841	0.649258	0.000620682				nuclear factor of kappa light polypeptide gene enhancer in B-cells 1	NFKB1	A_23_P30024	0.614237	0.000219873				SWI5 recombination repair homolog (yeast)	SWI5	A_23_P392222	-0.696021	2.00901e-06				RAB GTPase activating protein 1-like	RABGAP1L	A_24_P49349	-0.690989	6.25952e-06				AHA1, activator of heat shock 90kDa protein ATPase homolog 1 (yeast)	AHSA1	A_23_P117599	-0.692712	0.000837058
		SIN3 homolog A, transcription regulator (yeast)	SIN3A	A_23_P367676	0.602323	0.000194766				zinc finger protein 48	ZNF48	A_23_P415643	0.651295	0.000169002				Sec23 homolog B (S. cerevisiae)	SEC23B	A_24_P690924	0.614605	0.00489717				protein arginine methyltransferase 1	PRMT1	A_23_P39088	-0.695631	0.000401373				hepatoma-derived growth factor-related protein 2	HDGFRP2	A_23_P101699	-0.688667	2.37022e-05				solute carrier family 12 (potassium/chloride transporters), member 9	SLC12A9	A_33_P3229181	-0.692208	3.1019e-05
		long intergenic non-protein coding RNA 472	LINC00472	A_23_P156408	0.603356	0.00065662				tetratricopeptide repeat, ankyrin repeat and coiled-coil containing 2	TANC2	A_24_P942068	0.651648	1.33331e-05				signal transducer and activator of transcription 3 (acute-phase response factor)	STAT3	A_24_P116805	0.614697	6.7403e-06				coiled-coil domain containing 132	CCDC132	A_24_P77947	-0.695533	0.000212897				inhibitor of DNA binding 2, dominant negative helix-loop-helix protein	ID2	A_23_P143143	-0.687297	0.00381418				acyl-CoA binding domain containing 3	ACBD3	A_24_P171182	-0.6916	0.00681393
		RNA binding motif protein 43	RBM43	A_32_P116660	0.6038	0.00430926						A_33_P3253214	0.652605	0.0193184				zinc finger protein 586	ZNF586	A_23_P107693	0.615689	8.40318e-05				tRNA methyltransferase 61 homolog B (S. cerevisiae)	TRMT61B	A_23_P259823	-0.695182	0.00189774				intraflagellar transport 122 homolog (Chlamydomonas)	IFT122	A_23_P212447	-0.68685	2.43443e-05				DiGeorge syndrome critical region gene 11	DGCR11	A_33_P3411357	-0.691367	2.34473e-05
		TNF receptor-associated factor 6	TRAF6	A_23_P75921	0.604824	0.000581389				zinc finger protein 586	ZNF586	A_23_P107693	0.652799	4.70783e-05				H1 histone family, member X	H1FX	A_23_P96087	0.615974	0.000804276				proteasome (prosome, macropain) 26S subunit, non-ATPase, 10	PSMD10	A_33_P3335621	-0.69442	0.000351914					LOC100507239	A_21_P0014119	-0.684903	5.7316e-05						A_24_P375599	-0.691276	0.000425077
		uncharacterized LOC100499177	LOC100499177	A_19_P00329564	0.605203	3.72015e-05				c-abl oncogene 1, non-receptor tyrosine kinase	ABL1	A_23_P60180	0.653894	1.83884e-05					LOC148189	A_19_P00322711	0.616087	1.04989e-05				DnaJ (Hsp40) homolog, subfamily C, member 10	DNAJC10	A_24_P225604	-0.694213	0.000100656				ankyrin repeat domain 26	ANKRD26	A_23_P115597	-0.684383	1.19334e-05						A_32_P132477	-0.691005	5.17355e-05
		SH3-domain binding protein 4	SH3BP4	A_33_P3271121	0.605631	8.86974e-05				growth factor receptor-bound protein 10	GRB10	A_24_P235266	0.654213	0.000203019				zinc finger with KRAB and SCAN domains 5	ZKSCAN5	A_23_P259663	0.61613	7.37956e-05				protein kinase, cAMP-dependent, regulatory, type II, beta	PRKAR2B	A_23_P42975	-0.691058	3.4259e-05					XLOC_l2_010422	A_21_P0012555	-0.682743	0.000324095				RAB5A, member RAS oncogene family	RAB5A	A_23_P212545	-0.690665	8.68707e-06
		zinc finger protein 672	ZNF672	A_23_P83923	0.60566	1.14916e-05				gap junction protein, gamma 1, 45kDa	GJC1	A_33_P3373358	0.65428	3.55392e-06				polymerase (RNA) III (DNA directed) polypeptide C (62kD)	POLR3C	A_23_P35256	0.616701	0.000693814				family with sequence similarity 102, member B	FAM102B	A_24_P237927	-0.690324	0.0023425				sterol O-acyltransferase 1	SOAT1	A_24_P216654	-0.682052	0.000103126				small nuclear ribonucleoprotein 35kDa (U11/U12)	SNRNP35	A_23_P159101	-0.690329	0.000715907
		uncharacterized LOC100128242	LOC100128242	A_33_P3330079	0.606303	1.24528e-05				potassium large conductance calcium-activated channel, subfamily M beta member 3	KCNMB3	A_21_P0012333	0.654398	0.000130319				kinesin family member 23	KIF23	A_33_P3311755	0.617286	3.84813e-05				MTOR associated protein, LST8 homolog (S. cerevisiae)	MLST8	A_33_P3256054	-0.689866	3.51219e-05					XLOC_005473	A_21_P0004944	-0.681342	0.000445425				radixin	RDX	A_23_P203023	-0.690161	0.00249761
		chromosome 19 open reading frame 25	C19orf25	A_24_P373885	0.606384	0.000578985				La ribonucleoprotein domain family, member 6	LARP6	A_23_P117782	0.65608	3.36936e-05				long intergenic non-protein coding RNA 346	LINC00346	A_23_P368909	0.617891	0.000531231				coiled-coil domain containing 25	CCDC25	A_23_P71300	-0.689156	2.97006e-06				cullin 2	CUL2	A_24_P252794	-0.681327	0.00754346				protocadherin beta 2	PCDHB2	A_23_P213375	-0.689268	0.000239213
		chromosome 4 open reading frame 32	C4orf32	A_23_P58390	0.6068	7.25489e-05				zinc finger protein 7	ZNF7	A_23_P255805	0.656312	7.5513e-06				glutamic pyruvate transaminase (alanine aminotransferase) 2	GPT2	A_23_P37892	0.618114	0.000530937						A_33_P3219105	-0.688826	0.00577426				motile sperm domain containing 3	MOSPD3	A_23_P111492	-0.680945	0.000131687				golgin A7	GOLGA7	A_23_P71440	-0.688762	1.85806e-05
		c-abl oncogene 1, non-receptor tyrosine kinase	ABL1	A_24_P282416	0.607058	0.000315111				forkhead box O3	FOXO3	A_32_P102062	0.657293	0.000146069						A_33_P3424339	0.620751	0.00130775				carbamoyl-phosphate synthetase 2, aspartate transcarbamylase, and dihydroorotase	CAD	A_23_P40049	-0.688789	0.0014231				syntaxin binding protein 6 (amisyn)	STXBP6	A_24_P10214	-0.679973	1.29634e-05				protein kinase, cAMP-dependent, regulatory, type II, beta	PRKAR2B	A_23_P42975	-0.688712	3.54699e-05
				A_33_P3213086	0.60726	0.000592095				slowmo homolog 1 (Drosophila)	SLMO1	A_23_P38677	0.658077	5.98121e-06				exocyst complex component 8	EXOC8	A_23_P430161	0.621936	3.40571e-06				coiled-coil domain containing 23	CCDC23	A_24_P263937	-0.688562	0.000213524				calcium channel, voltage-dependent, alpha 2/delta subunit 3	CACNA2D3	A_33_P3373259	-0.679255	0.000261889				DEAD (Asp-Glu-Ala-Asp) box polypeptide 39A	DDX39A	A_23_P78664	-0.688525	4.18816e-06
			SNHG11	A_19_P00318014	0.607544	3.02936e-05				family with sequence similarity 60, member A	FAM60A	A_32_P103837	0.658468	3.12248e-06					LOC100499467	A_19_P00319646	0.622745	0.000576362				UTP6, small subunit (SSU) processome component, homolog (yeast)	UTP6	A_23_P164237	-0.688418	0.00388609				FtsJ homolog 3 (E. coli)	FTSJ3	A_23_P55091	-0.679236	0.000963903					XLOC_l2_010422	A_21_P0012555	-0.688474	0.000300844
		seven in absentia homolog 1 (Drosophila)	SIAH1	A_23_P106798	0.607959	9.40728e-05				death inducer-obliterator 1	DIDO1	A_23_P395426	0.658505	0.000385863						A_32_P88905	0.622977	9.20747e-06				ribosomal protein S3A	RPS3A	A_23_P144497	-0.687825	0.0019922				chromosome 18 open reading frame 32	C18orf32	A_24_P271049	-0.677115	2.64394e-05				GH3 domain containing	GHDC	A_23_P207387	-0.68826	0.000249677
		v-ets erythroblastosis virus E26 oncogene homolog 2 (avian)	ETS2	A_24_P314179	0.608223	0.000720087				zinc finger, HIT-type containing 6	ZNHIT6	A_24_P113686	0.658551	3.39215e-06				ubiquitin specific peptidase 37	USP37	A_24_P109082	0.624046	0.000121642				pseudouridylate synthase 3	PUS3	A_23_P13073	-0.685057	1.32853e-05				surfeit 2	SURF2	A_23_P146479	-0.676844	0.000705899				thymidylate synthetase	TYMS	A_23_P50096	-0.688182	3.49453e-05
		long intergenic non-protein coding RNA 338	LINC00338	A_19_P00316919	0.608415	0.000430866				Meis homeobox 1	MEIS1	A_24_P319736	0.658901	9.03796e-05				spermidine/spermine N1-acetyltransferase 1	SAT1	A_33_P3371718	0.624242	0.00179301				ADP-dependent glucokinase	ADPGK	A_23_P14716	-0.684468	0.000200917				thymidylate synthetase	TYMS	A_23_P50096	-0.6767	4.14671e-05				syntaxin binding protein 6 (amisyn)	STXBP6	A_23_P205713	-0.687342	1.09421e-05
		chromosome 17 open reading frame 51	C17orf51	A_19_P00316404	0.608891	5.07495e-05				bromodomain and PHD finger containing, 1	BRPF1	A_23_P250948	0.658959	9.65231e-05				family with sequence similarity 53, member C	FAM53C	A_23_P167789	0.62427	3.23037e-05				histone cluster 1, H1b	HIST1H1B	A_23_P250385	-0.684268	0.00388039				crystallin, mu	CRYM	A_23_P77731	-0.67496	9.69879e-05				LIM domain 7	LMO7	A_33_P3280805	-0.687102	0.000461212
		poly (ADP-ribose) polymerase family, member 6	PARP6	A_23_P163258	0.609527	0.0029621				vascular endothelial growth factor A	VEGFA	A_24_P12401	0.6594	5.22924e-05				GATA binding protein 3	GATA3	A_33_P3360341	0.6246	3.26863e-05				BH3 interacting domain death agonist	BID	A_33_P3227041	-0.683617	0.00135908				aminolevulinate, delta-, synthase 1	ALAS1	A_24_P191588	-0.673839	3.28251e-05				TRIM39-RPP21 readthrough	TRIM39-RPP21	A_33_P3879920	-0.686939	6.16342e-06
		zinc finger and BTB domain containing 40	ZBTB40	A_23_P387523	0.60972	5.1867e-05				ring finger protein 138	RNF138	A_23_P89755	0.660122	0.000222997				chromosome 3 open reading frame 52	C3orf52	A_23_P58009	0.624604	7.02452e-06						A_33_P3296442	-0.681282	0.000649169				H3 histone, family 3B (H3.3B)	H3F3B	A_33_P3410194	-0.671797	5.89791e-05				checkpoint kinase 1	CHEK1	A_33_P3349536	-0.686766	4.4919e-05
		opioid growth factor receptor	OGFR	A_23_P28707	0.609949	0.0124474				BTG3 associated nuclear protein	BANP	A_23_P22263	0.660491	0.000371425				forkhead box D1	FOXD1	A_32_P34920	0.625644	0.00201714				3'-phosphoadenosine 5'-phosphosulfate synthase 1	PAPSS1	A_23_P144465	-0.679357	0.000127023				twinfilin, actin-binding protein, homolog 2 (Drosophila)	TWF2	A_23_P121265	-0.671457	8.08616e-05				hexokinase domain containing 1	HKDC1	A_33_P3335233	-0.686503	8.96161e-05
		inositol 1,4,5-trisphosphate receptor interacting protein	ITPRIP	A_23_P340333	0.610085	0.0015607				transducer of ERBB2, 2 pseudogene 1	TOB2P1	A_33_P3348011	0.660515	0.000543279				chromosome 1 open reading frame 124	C1orf124	A_24_P15292	0.62611	0.00276124						A_33_P3275255	-0.678855	0.00278563				B9 protein domain 1	B9D1	A_23_P152678	-0.67025	1.72485e-05				cofilin 1 (non-muscle)	CFL1	A_23_P35820	-0.685326	0.00025681
		chromosome 6 open reading frame 35	C6orf35	A_33_P3441060	0.611013	0.000592003				interferon regulatory factor 1	IRF1	A_23_P41765	0.661974	1.30562e-05				cardiotrophin-like cytokine factor 1	CLCF1	A_23_P138760	0.626586	0.000146668				DEAD (Asp-Glu-Ala-Asp) box polypeptide 39A	DDX39A	A_23_P78664	-0.678321	4.94492e-06				exocyst complex component 4	EXOC4	A_24_P7946	-0.669297	0.000113794				chitinase domain containing 1	CHID1	A_24_P295806	-0.685132	0.00777413
		ephrin-A1	EFNA1	A_23_P113005	0.611651	8.25905e-05				asparagine synthetase pseudogene	FLJ43315	A_21_P0010773	0.663721	5.81965e-05				TATA box binding protein (TBP)-associated factor, RNA polymerase I, A, 48kDa	TAF1A	A_33_P3406245	0.627842	3.32428e-05				family with sequence similarity 54, member B	FAM54B	A_23_P97195	-0.678301	0.000330301				tetratricopeptide repeat domain 35	TTC35	A_23_P60002	-0.668626	0.00144202				major facilitator superfamily domain containing 9	MFSD9	A_33_P3272189	-0.685126	0.00559843
		chromosome 9 open reading frame 91	C9orf91	A_24_P915196	0.611818	6.36308e-05				cell growth regulator with EF-hand domain 1	CGREF1	A_21_P0000061	0.663879	0.0112903				zinc finger protein 217	ZNF217	A_23_P210608	0.628066	0.000514762				selenoprotein T	SELT	A_33_P3305851	-0.677006	0.00113962				tubulin, alpha 1c	TUBA1C	A_24_P58529	-0.668025	0.00022132				bone morphogenetic protein 7	BMP7	A_23_P68487	-0.683444	2.32631e-05
		chromosome 17 open reading frame 51	C17orf51	A_24_P59607	0.612222	1.80155e-05				ubiquitin specific peptidase 31	USP31	A_23_P206612	0.664098	6.22433e-05				nuclear receptor subfamily 3, group C, member 1 (glucocorticoid receptor)	NR3C1	A_33_P3216297	0.628441	0.000601299				hydroxysteroid dehydrogenase like 1	HSDL1	A_23_P206324	-0.676595	0.000192356				chromosome 9 open reading frame 86	C9orf86	A_33_P3821660	-0.667449	0.000139335				Morf4 family associated protein 1	MRFAP1	A_24_P11965	-0.682049	0.0342652
		kinesin family member 24	KIF24	A_33_P3406939	0.613074	8.7329e-05				B-cell CLL/lymphoma 3	BCL3	A_23_P4662	0.665798	0.00123716				uncharacterized LOC645676	LOC645676	A_24_P272225	0.628602	0.000456419				calmodulin binding transcription activator 1	CAMTA1	A_21_P0000131	-0.676106	4.7672e-05				BTG family, member 2	BTG2	A_23_P62901	-0.667304	0.00175736				nudix (nucleoside diphosphate linked moiety X)-type motif 2	NUDT2	A_23_P112478	-0.681163	4.06002e-06
		zinc finger protein 732	ZNF732	A_24_P281801	0.613265	0.0151687				IKAROS family zinc finger 5 (Pegasus)	IKZF5	A_33_P3421520	0.667098	0.000666039				zinc finger protein 845	ZNF845	A_32_P207428	0.62912	4.10718e-06				Rho guanine nucleotide exchange factor (GEF) 3	ARHGEF3	A_23_P143885	-0.675051	7.01385e-05				DEAD (Asp-Glu-Ala-Asp) box polypeptide 39A	DDX39A	A_23_P78664	-0.666941	5.96206e-06				protein phosphatase 1, catalytic subunit, gamma isozyme	PPP1CC	A_24_P386771	-0.679897	0.000175829
		RBAK-LOC389458 readthrough	RBAK-LOC389458	A_33_P3232038	0.613911	0.000963164				long intergenic non-protein coding RNA 338	LINC00338	A_32_P8529	0.667353	0.000238603				collagen, type IV, alpha 5	COL4A5	A_23_P45365	0.629855	0.00141889				chaperonin containing TCP1, subunit 8 (theta)	CCT8	A_23_P102876	-0.674092	0.000174287				chromosome alignment maintaining phosphoprotein 1	CHAMP1	A_23_P164559	-0.666844	0.00018851				ribosomal protein S14	RPS14	A_23_P81492	-0.679716	0.000100666
		collagen, type XXIII, alpha 1	COL23A1	A_33_P3341722	0.614996	0.000239359				solute carrier family 6 (neurotransmitter transporter, glycine), member 9	SLC6A9	A_33_P3402615	0.667373	0.000226516				zinc finger protein 416	ZNF416	A_23_P55688	0.630946	1.98864e-05				motile sperm domain containing 3	MOSPD3	A_33_P3321946	-0.673752	0.000303721				stomatin (EPB72)-like 2	STOML2	A_24_P338145	-0.666145	0.00159934				B9 protein domain 1	B9D1	A_23_P152678	-0.67959	1.48966e-05
		cat eye syndrome chromosome region, candidate 7 (non-protein coding)	CECR7	A_33_P3262625	0.615838	8.40726e-05				microtubule associated monoxygenase, calponin and LIM domain containing 3	MICAL3	A_33_P3267814	0.667909	5.73758e-05				Meis homeobox 1	MEIS1	A_24_P319736	0.631164	0.000136412				Cdc42 guanine nucleotide exchange factor (GEF) 9	ARHGEF9	A_24_P254551	-0.673165	0.000302884				charged multivesicular body protein 2A	CHMP2A	A_23_P153236	-0.665857	6.4949e-06				paraneoplastic antigen MA1	PNMA1	A_33_P3245539	-0.678275	0.000466103
		zinc finger protein 775	ZNF775	A_33_P3289426	0.616535	8.70949e-06				Fas apoptotic inhibitory molecule 3	FAIM3	A_23_P138125	0.66956	8.49393e-05				zinc finger family member 783	ZNF783	A_23_P365418	0.631207	1.98364e-05				vaccinia related kinase 1	VRK1	A_23_P76761	-0.672489	0.000544707				adenylate kinase 1	AK1	A_23_P217088	-0.665805	4.35897e-06				intraflagellar transport 122 homolog (Chlamydomonas)	IFT122	A_23_P212447	-0.677197	2.81888e-05
		zinc finger and BTB domain containing 24	ZBTB24	A_21_P0000040	0.617381	0.00378162				chromosome 10 open reading frame 28	C10orf28	A_33_P3228872	0.670837	1.14094e-05				transcription factor binding to IGHM enhancer 3	TFE3	A_23_P84952	0.631299	0.000245627				muscleblind-like 2 (Drosophila)	MBNL2	A_33_P3391076	-0.672315	0.000511228					FAM200B	A_19_P00322856	-0.664635	0.000434581				inhibitor of growth family, member 1	ING1	A_24_P39211	-0.676516	0.000105014
		Ets2 repressor factor	ERF	A_23_P4679	0.6178	0.000338072				zinc finger protein 432	ZNF432	A_23_P208210	0.67106	1.18928e-05				p53 and DNA-damage regulated 1	PDRG1	A_23_P166159	0.631446	4.05645e-05					XLOC_l2_007271	A_21_P0011796	-0.672056	0.00566388				KTI12 homolog, chromatin associated (S. cerevisiae)	KTI12	A_23_P103276	-0.663518	4.11846e-05				excision repair cross-complementing rodent repair deficiency, complementation group 6-like	ERCC6L	A_23_P96325	-0.675343	0.00209212
		chromosome 3 open reading frame 52	C3orf52	A_23_P58009	0.618095	7.87641e-06				YOD1 OTU deubiquinating enzyme 1 homolog (S. cerevisiae)	YOD1	A_32_P178945	0.671165	5.07108e-06				insulin receptor substrate 2	IRS2	A_24_P154037	0.633802	0.000142163				chromosome 9 open reading frame 85	C9orf85	A_33_P3409506	-0.671481	0.000127896				mitogen-activated protein kinase 8	MAPK8	A_33_P3250289	-0.663344	0.000218557				uncharacterized protein DKFZp761E198	DKFZp761E198	A_24_P9883	-0.674858	0.000234254
		tripartite motif containing 11	TRIM11	A_23_P115124	0.618773	9.14087e-06				tumor necrosis factor receptor superfamily, member 10b	TNFRSF10B	A_24_P218265	0.67213	2.04529e-05				zinc finger, DBF-type containing 2	ZDBF2	A_32_P68504	0.633952	0.00010369				RAB5B, member RAS oncogene family	RAB5B	A_23_P410998	-0.671296	0.0002907				ISG15 ubiquitin-like modifier	ISG15	A_23_P819	-0.661192	0.00146054				drosha, ribonuclease type III	DROSHA	A_23_P133596	-0.674204	7.07057e-05
			XLOC_l2_014504	A_21_P0013514	0.618944	0.00150206				AT rich interactive domain 5A (MRF1-like)	ARID5A	A_23_P143016	0.672625	8.33289e-05				zinc finger protein 548	ZNF548	A_33_P3239148	0.634189	0.000733015				ASF1 anti-silencing function 1 homolog B (S. cerevisiae)	ASF1B	A_23_P119254	-0.671168	1.94593e-05				IWS1 homolog (S. cerevisiae)	IWS1	A_23_P165574	-0.66031	1.23803e-05				tRNA methyltransferase 61 homolog B (S. cerevisiae)	TRMT61B	A_23_P259823	-0.672811	0.00241671
		zinc finger protein 155	ZNF155	A_24_P301629	0.620116	0.000585372				zinc finger and BTB domain containing 8A	ZBTB8A	A_33_P3475737	0.67299	0.000378844				CWC25 spliceosome-associated protein homolog (S. cerevisiae)	CWC25	A_24_P48318	0.634209	0.00153351				hydroxypyruvate isomerase (putative)	HYI	A_23_P160582	-0.669047	8.18896e-05				roundabout, axon guidance receptor, homolog 3 (Drosophila)	ROBO3	A_23_P87082	-0.660082	0.000379921						A_33_P3253832	-0.672395	0.000416107
		zinc finger protein 684	ZNF684	A_23_P11598	0.620147	0.000259214				nuclear factor of kappa light polypeptide gene enhancer in B-cells inhibitor, epsilon	NFKBIE	A_23_P30655	0.673452	0.000583872				family with sequence similarity 122C	FAM122C	A_21_P0000080	0.63489	0.00475049				transmembrane protein 199	TMEM199	A_23_P27048	-0.668807	1.4703e-05				long intergenic non-protein coding RNA 478	LINC00478	A_24_P229536	-0.659074	0.000334807				solute carrier family 9 (sodium/hydrogen exchanger), member 4	SLC9A4	A_33_P3396270	-0.672314	1.78778e-05
				A_33_P3289860	0.620602	0.0246658				brain expressed X-linked 2	BEX2	A_33_P3245178	0.673473	0.00113744				forkhead box O3	FOXO3	A_32_P102062	0.635758	0.000199158				beta-site APP-cleaving enzyme 2	BACE2	A_23_P154875	-0.668767	0.000315007				hydroxypyruvate isomerase (putative)	HYI	A_23_P160582	-0.658933	9.49411e-05				WD repeat domain 44	WDR44	A_33_P3239736	-0.672011	0.000631285
		small nucleolar RNA host gene 8 (non-protein coding)	SNHG8	A_32_P38467	0.620665	0.000245981				chromosome 3 open reading frame 52	C3orf52	A_23_P58009	0.675656	2.93143e-06				ring finger protein 138 pseudogene 1	RNF138P1	A_33_P3413541	0.63741	0.000296117				CDK5 regulatory subunit associated protein 2	CDK5RAP2	A_23_P83110	-0.6672	9.42067e-06						A_24_P186986	-0.657195	4.9104e-06				proteasome (prosome, macropain) 26S subunit, non-ATPase, 1	PSMD1	A_24_P128205	-0.671855	0.000169022
		bromodomain containing 4	BRD4	A_33_P3373745	0.620667	7.05084e-06				DnaJ (Hsp40) homolog, subfamily B, member 9	DNAJB9	A_23_P258944	0.676644	0.000141027				chromosome 18 open reading frame 8	C18orf8	A_23_P78383	0.638107	5.43874e-05					XLOC_002133	A_21_P0002454	-0.666936	2.70159e-05				lysophosphatidylcholine acyltransferase 2	LPCAT2	A_23_P141021	-0.657123	1.18808e-05				establishment of cohesion 1 homolog 2 (S. cerevisiae)	ESCO2	A_24_P323598	-0.671649	0.0011517
		proline rich 24	PRR24	A_23_P386168	0.620986	9.68881e-06				Ras homolog enriched in brain like 1	RHEBL1	A_33_P3264895	0.676742	4.59841e-06				zinc finger protein 398	ZNF398	A_32_P151875	0.638259	0.000170444				mitochondrial ribosomal protein L36	MRPL36	A_24_P371758	-0.666534	4.54081e-05				family with sequence similarity 54, member B	FAM54B	A_23_P97195	-0.656158	0.000441814				SAP30-like	SAP30L	A_23_P368101	-0.671221	3.23129e-06
		immediate early response 2	IER2	A_32_P36235	0.621797	1.6224e-05				megakaryoblastic leukemia (translocation) 1	MKL1	A_23_P348138	0.677982	8.67272e-05					XLOC_l2_009029	A_21_P0012174	0.639428	0.000833077				CD19 molecule	CD19	A_23_P113572	-0.666075	0.000820259				kinesin family member 13B	KIF13B	A_33_P3244083	-0.654024	0.00158721				cancer/testis antigen family 45, member A1	CT45A1	A_32_P780817	-0.670391	6.94404e-06
		histone cluster 2, H2aa4	HIST2H2AA4	A_23_P309381	0.622077	0.00518414				dopey family member 1	DOPEY1	A_33_P3300757	0.678521	9.40237e-05				yippee-like 5 (Drosophila)	YPEL5	A_23_P108835	0.639583	0.000739521				keratin 18 pseudogene 55	KRT18P55	A_23_P373708	-0.664091	0.00335676				tetratricopeptide repeat domain 28	TTC28	A_32_P100683	-0.653283	5.70299e-05				tRNA methyltransferase 11 homolog (S. cerevisiae)	TRMT11	A_24_P89509	-0.669795	0.00164048
		folliculin	FLCN	A_23_P414308	0.623117	6.55807e-05				uncharacterized LOC148189	LOC148189	A_33_P3705884	0.679465	1.31847e-05				transforming growth factor beta regulator 1	TBRG1	A_24_P21752	0.639683	0.00254142				immediate early response 3 interacting protein 1	IER3IP1	A_23_P4474	-0.664087	0.00170407				fatty acyl CoA reductase 1	FAR1	A_24_P163920	-0.651198	0.00194913				PRP40 pre-mRNA processing factor 40 homolog A (S. cerevisiae)	PRPF40A	A_23_P16762	-0.669659	0.00135589
		zinc finger protein 600	ZNF600	A_23_P16006	0.624052	0.000127492				Mdm4 p53 binding protein homolog (mouse)	MDM4	A_23_P103503	0.679982	0.000231136				zinc finger protein 274	ZNF274	A_23_P153251	0.640515	7.24444e-05				ATPase, Ca++ transporting, ubiquitous	ATP2A3	A_23_P207632	-0.663759	0.000207557				pseudouridylate synthase 3	PUS3	A_23_P13073	-0.650118	2.30807e-05				utrophin	UTRN	A_32_P524014	-0.669038	0.000341971
		uncharacterized LOC378805	FLJ43663	A_19_P00321886	0.625338	1.33432e-05				WD repeat domain 33	WDR33	A_33_P3335845	0.680716	0.00037022				CD81 molecule	CD81	A_33_P3373375	0.640684	0.00503143				THAP domain containing 4	THAP4	A_23_P84782	-0.663062	4.15773e-05				cytochrome P450, family 2, subfamily S, polypeptide 1	CYP2S1	A_23_P101374	-0.649908	0.00271855				eukaryotic translation elongation factor 1 beta 2	EEF1B2	A_32_P49616	-0.668587	0.000208646
		HLA complex group 18 (non-protein coding)	HCG18	A_19_P00317082	0.625493	0.000401982				zinc finger protein 200	ZNF200	A_23_P152356	0.681428	1.29893e-05				transmembrane protein, adipocyte asscociated 1	TPRA1	A_33_P3399373	0.640942	0.000244066				GH3 domain containing	GHDC	A_23_P207387	-0.662561	0.000350883				tubulin, beta class I	TUBB	A_23_P81912	-0.649449	1.61071e-05				chromosome 4 open reading frame 27	C4orf27	A_24_P49371	-0.667845	0.00193031
		GA binding protein transcription factor, beta subunit 1	GABPB1	A_23_P205789	0.625638	8.88022e-05				zinc finger and BTB domain containing 24	ZBTB24	A_21_P0000040	0.682422	0.00183927				trichorhinophalangeal syndrome I	TRPS1	A_33_P3361746	0.641493	0.000481795				exosome component 1	EXOSC1	A_23_P35591	-0.662005	6.58442e-06				platelet-derived growth factor receptor-like	PDGFRL	A_23_P60146	-0.647816	2.25969e-06				kelch repeat and BTB (POZ) domain containing 4	KBTBD4	A_23_P202696	-0.667739	1.47422e-05
		spermidine/spermine N1-acetyltransferase 1	SAT1	A_33_P3371718	0.626306	0.00174883				golgi SNAP receptor complex member 2	GOSR2	A_24_P108242	0.683814	1.26764e-06				chromosome 9 open reading frame 91	C9orf91	A_24_P915196	0.641685	3.94609e-05				protein kinase (cAMP-dependent, catalytic) inhibitor gamma	PKIG	A_23_P91221	-0.660724	0.000510896				inhibitor of DNA binding 2, dominant negative helix-loop-helix protein	ID2	A_32_P69368	-0.647544	0.0028902						A_19_P00320948	-0.667448	0.000179521
		zinc finger protein 839 pseudogene	LOC389906	A_21_P0013805	0.626595	8.68138e-06				brain-derived neurotrophic factor	BDNF	A_32_P7316	0.684	0.00165648				MOB family member 4, phocein	MOB4	A_23_P210274	0.642491	0.000221656						A_23_P258108	-0.660364	0.000424825				TRIM39-RPP21 readthrough	TRIM39-RPP21	A_33_P3879920	-0.647424	1.1736e-05				netrin 4	NTN4	A_23_P204630	-0.666531	0.0021244
		cytoplasmic polyadenylation element binding protein 4	CPEB4	A_23_P251937	0.626869	5.00095e-06				polycystic kidney disease 1 (autosomal dominant)	PKD1	A_23_P77502	0.684412	0.00099458				transmembrane protein 55B	TMEM55B	A_23_P48610	0.643416	0.000113782				hepatoma-derived growth factor-related protein 2	HDGFRP2	A_23_P101699	-0.66033	3.65399e-05				splicing factor 3b, subunit 2, 145kDa	SF3B2	A_23_P64083	-0.646813	0.00034243				collagen, type IV, alpha 6	COL4A6	A_23_P217379	-0.665661	1.08666e-05
		zinc finger protein 300	ZNF300	A_33_P3404824	0.628487	0.00098445				uncharacterized LOC100499177	LOC100499177	A_19_P00803960	0.686356	2.48644e-05				ring finger protein 138	RNF138	A_23_P89755	0.645369	0.000273706				ribosomal RNA processing 15 homolog (S. cerevisiae)	RRP15	A_23_P23356	-0.660188	0.0016352				Cdc42 guanine nucleotide exchange factor (GEF) 9	ARHGEF9	A_24_P254551	-0.646373	0.000433038				E74-like factor 3 (ets domain transcription factor, epithelial-specific )	ELF3	A_23_P104188	-0.664762	0.00163826
		phosphatidylinositol glycan anchor biosynthesis, class A	PIGA	A_24_P288754	0.628569	9.16524e-06				zinc finger protein 548	ZNF548	A_33_P3239148	0.686553	0.000372461				methyltransferase like 21B	METTL21B	A_23_P320878	0.645516	3.44582e-05					XLOC_l2_002033	A_21_P0010888	-0.657974	4.45178e-05				DnaJ (Hsp40) homolog, subfamily C, member 10	DNAJC10	A_24_P225604	-0.644783	0.000201805				ring finger protein 2	RNF2	A_23_P85543	-0.663045	0.000511268
		forkhead box O3	FOXO3	A_32_P102062	0.628841	0.000220186					XLOC_011157	A_21_P0008807	0.686767	3.38728e-05				high mobility group box 2	HMGB2	A_23_P155765	0.64712	9.38926e-05				solute carrier family 10 (sodium/bile acid cotransporter family), member 7	SLC10A7	A_33_P3323048	-0.657867	0.000255384						A_33_P3219105	-0.644024	0.00878193				solute carrier family 10 (sodium/bile acid cotransporter family), member 7	SLC10A7	A_33_P3323048	-0.662481	0.000239705
			XLOC_l2_002033	A_21_P0010951	0.628951	0.000604557					XLOC_014105	A_19_P00321272	0.687532	0.000751772				Mab-21 domain containing 2	MB21D2	A_32_P117464	0.649489	1.20285e-05				neural precursor cell expressed, developmentally down-regulated 4-like	NEDD4L	A_24_P782308	-0.657816	2.02157e-05				mitogen-activated protein kinase 3	MAPK3	A_23_P37910	-0.643375	2.30225e-05				SMAD family member 2	SMAD2	A_32_P12580	-0.66189	0.000594785
		thioredoxin-like 4B	TXNL4B	A_24_P399083	0.629623	0.000313824				phosphodiesterase 4B, cAMP-specific	PDE4B	A_23_P74278	0.687836	5.73817e-05				Sjogren syndrome/scleroderma autoantigen 1	SSSCA1	A_23_P98261	0.649517	4.0764e-05				NADH dehydrogenase (ubiquinone) Fe-S protein 6, 13kDa (NADH-coenzyme Q reductase)	NDUFS6	A_23_P122228	-0.657423	5.03513e-06						A_33_P3210561	-0.643213	1.47159e-05				uncharacterized LOC729013	LOC729013	A_21_P0007122	-0.661373	0.000607171
		sideroflexin 5	SFXN5	A_33_P3292896	0.62971	0.0184324				coiled-coil domain containing 130	CCDC130	A_23_P101461	0.688589	0.000127575					XLOC_005110	A_21_P0004479	0.649909	7.10976e-06				adenylate kinase 1	AK1	A_23_P217088	-0.656884	5.06391e-06				hydroxysteroid dehydrogenase like 1	HSDL1	A_23_P206324	-0.642674	0.00030678				leucine rich repeat containing 37B pseudogene 1	LRRC37BP1	A_32_P28402	-0.660685	0.00092632
		zinc finger protein 281	ZNF281	A_23_P311087	0.629818	2.78589e-05				cat eye syndrome chromosome region, candidate 7 (non-protein coding)	CECR7	A_33_P3262625	0.688812	2.73043e-05				transforming growth factor, beta receptor II (70/80kDa)	TGFBR2	A_23_P211957	0.649993	0.000993818				atlastin GTPase 2	ATL2	A_23_P415015	-0.656039	0.00139177				myoferlin	MYOF	A_23_P354387	-0.64263	1.96819e-05				Zwilch, kinetochore associated, homolog (Drosophila)	ZWILCH	A_33_P3433873	-0.658442	0.000376167
		pleckstrin homology domain containing, family G (with RhoGef domain) member 5	PLEKHG5	A_23_P149626	0.631017	0.00190077				surfeit 6	SURF6	A_24_P21447	0.689671	1.29563e-05				cytochrome P450, family 1, subfamily B, polypeptide 1	CYP1B1	A_33_P3290343	0.65107	0.000540012				glucuronidase, beta pseudogene 1	GUSBP1	A_24_P332739	-0.655244	0.00169921				Ras association (RalGDS/AF-6) domain family member 4	RASSF4	A_24_P295590	-0.641379	0.000379179				tropomyosin 1 (alpha)	TPM1	A_33_P3335966	-0.657485	7.53256e-06
		chromosome 17 open reading frame 51	C17orf51	A_19_P00316405	0.631541	1.61107e-05				zinc finger protein 628	ZNF628	A_32_P409222	0.690382	0.000142933				dedicator of cytokinesis 11	DOCK11	A_23_P148584	0.651218	0.00165052				lipin 2	LPIN2	A_24_P301557	-0.654399	0.000838516				calmodulin 2 (phosphorylase kinase, delta)	CALM2	A_33_P3212782	-0.640965	0.0124048					XLOC_002133	A_21_P0002454	-0.657336	3.13706e-05
		SCAN domain containing 2 pseudogene	SCAND2	A_23_P205875	0.631893	9.94311e-05				Cas-Br-M (murine) ecotropic retroviral transforming sequence-like 1	CBLL1	A_23_P146004	0.690887	7.33891e-05				zinc finger protein 501	ZNF501	A_33_P3257856	0.65143	0.000100301				disabled homolog 2, mitogen-responsive phosphoprotein (Drosophila)	DAB2	A_33_P3338928	-0.654357	0.000206138				small Cajal body-specific RNA 15	SCARNA15	A_21_P0008664	-0.639777	0.000466832				activity-dependent neuroprotector homeobox	ADNP	A_24_P134319	-0.65696	9.9344e-05
		heme oxygenase (decycling) 1	HMOX1	A_23_P120883	0.632125	0.000669979				coagulation factor III (thromboplastin, tissue factor)	F3	A_33_P3226832	0.691771	0.000575974				arginine/serine-rich coiled-coil 2	RSRC2	A_23_P53267	0.652083	4.33729e-05				mitogen-activated protein kinase 3	MAPK3	A_23_P37910	-0.654044	1.93825e-05				S-phase kinase-associated protein 2 (p45)	SKP2	A_23_P156310	-0.639619	1.23652e-05				frizzled family receptor 5	FZD5	A_23_P108437	-0.656901	0.000285063
		zinc finger protein 473	ZNF473	A_24_P941376	0.632193	0.000922023				kinesin family member 24	KIF24	A_33_P3406939	0.692266	2.57682e-05				WEE1 homolog (S. pombe)	WEE1	A_33_P3290567	0.655049	0.00654707				leucine rich repeat containing 8 family, member A	LRRC8A	A_23_P250274	-0.651581	3.04145e-06				exosome component 1	EXOSC1	A_23_P35591	-0.638638	9.74061e-06				SUB1 homolog (S. cerevisiae)	SUB1	A_24_P320328	-0.655279	0.0137394
		chromosome 11 open reading frame 68	C11orf68	A_23_P150238	0.632241	0.00152161				GABA(A) receptor-associated protein like 1	GABARAPL1	A_33_P3812669	0.694984	3.30729e-06				zinc finger protein 607	ZNF607	A_23_P27810	0.656452	0.00167293				glutaminyl-tRNA synthase (glutamine-hydrolyzing)-like 1	QRSL1	A_24_P63799	-0.651386	0.000105106				protein inhibitor of activated STAT, 1	PIAS1	A_23_P163353	-0.637447	0.00203969				SWI/SNF related, matrix associated, actin dependent regulator of chromatin, subfamily a, member 2	SMARCA2	A_23_P60354	-0.655169	0.000843849
		uncharacterized LOC100506392	LOC100506392	A_19_P00321183	0.632663	0.000515403				zinc finger protein 12	ZNF12	A_23_P31335	0.69588	2.79106e-05				family with sequence similarity 27, member A	FAM27A	A_24_P342096	0.657142	4.97366e-05				defective in sister chromatid cohesion 1 homolog (S. cerevisiae)	DSCC1	A_23_P252740	-0.651372	0.000237914				phosphoribosyl pyrophosphate amidotransferase	PPAT	A_24_P123347	-0.637045	0.000382101				TSPY-like 2	TSPYL2	A_23_P170608	-0.655093	0.000644609
		high mobility group 20B	HMG20B	A_33_P3394599	0.633995	0.00533947				Ets2 repressor factor	ERF	A_23_P4679	0.697328	0.000110735				zinc finger protein 567	ZNF567	A_23_P354894	0.657282	0.000716764				BTG family, member 2	BTG2	A_23_P62901	-0.651114	0.00211199				Yip1 domain family, member 5	YIPF5	A_24_P328969	-0.636435	0.00115157				ubiquitin-conjugating enzyme E2E 3	UBE2E3	A_24_P148450	-0.65483	0.00108418
		torsin family 2, member A	TOR2A	A_33_P3275835	0.634737	0.0282544				zinc finger protein 643	ZNF643	A_23_P160200	0.697417	1.93008e-06				calcyclin binding protein	CACYBP	A_24_P45379	0.657568	0.000998945				procollagen C-endopeptidase enhancer 2	PCOLCE2	A_23_P57709	-0.650883	9.03698e-05				tubulin, alpha 1a	TUBA1A	A_23_P139547	-0.636367	0.000456539				interferon-induced protein 35	IFI35	A_23_P152782	-0.653602	0.000312255
		consortin, connexin sorting protein	CNST	A_33_P3424462	0.635491	0.000110923				proline-rich nuclear receptor coactivator 1	PNRC1	A_33_P3279831	0.698035	0.0011678				topoisomerase I binding, arginine/serine-rich, E3 ubiquitin protein ligase	TOPORS	A_23_P32217	0.658411	0.000982194				fermitin family member 2	FERMT2	A_33_P3344482	-0.650758	0.000106584				CDK5 regulatory subunit associated protein 2	CDK5RAP2	A_23_P83110	-0.634779	1.60626e-05				trafficking protein particle complex 4	TRAPPC4	A_23_P127613	-0.652507	4.42882e-05
		WD repeat domain 33	WDR33	A_33_P3335845	0.635685	0.000665689				fibroblast growth factor 2 (basic)	FGF2	A_33_P3419696	0.698459	0.0018053				headcase homolog (Drosophila)	HECA	A_23_P59349	0.658438	4.69606e-06				platelet-derived growth factor receptor-like	PDGFRL	A_23_P60146	-0.649616	2.18938e-06				heat shock 70kDa protein 4	HSPA4	A_24_P377269	-0.634036	1.78207e-05				eukaryotic translation termination factor 1	ETF1	A_23_P133582	-0.651273	0.00242577
		zinc finger protein 182	ZNF182	A_32_P43465	0.636022	0.000233131				meningioma expressed antigen 5 (hyaluronidase)	MGEA5	A_24_P67898	0.698732	0.000658945				zinc finger protein 697	ZNF697	A_32_P19716	0.658532	3.46812e-06						A_24_P375599	-0.648463	0.000731351				nuclear receptor corepressor 1	NCOR1	A_24_P237661	-0.633191	0.000671842				muscleblind-like 2 (Drosophila)	MBNL2	A_33_P3391076	-0.650166	0.000678452
		slowmo homolog 1 (Drosophila)	SLMO1	A_23_P38677	0.636707	8.58405e-06				family with sequence similarity 27, member A	FAM27A	A_24_P342096	0.698923	2.65346e-05				family with sequence similarity 207, member A	FAM207A	A_33_P3705907	0.658595	0.000136574				bromodomain and WD repeat domain containing 3	BRWD3	A_32_P489130	-0.648242	0.000209625				PNN-interacting serine/arginine-rich protein	PNISR	A_23_P122615	-0.632421	0.000109935				vaccinia related kinase 1	VRK1	A_23_P76761	-0.649448	0.000729948
		phosphoprotein enriched in astrocytes 15	PEA15	A_24_P410952	0.637219	9.40282e-06				transmembrane protein 79	TMEM79	A_23_P149259	0.699432	7.27708e-05				inositol hexakisphosphate kinase 2	IP6K2	A_23_P301138	0.658728	5.92209e-05				protocadherin beta 2	PCDHB2	A_23_P213375	-0.64804	0.000414128				potassium channel tetramerisation domain containing 3	KCTD3	A_23_P160406	-0.632363	0.000215735				Ras association (RalGDS/AF-6) domain family member 2	RASSF2	A_23_P166087	-0.647873	7.46839e-05
				A_24_P212819	0.637469	0.0020237				v-ets erythroblastosis virus E26 oncogene homolog 2 (avian)	ETS2	A_24_P314179	0.701248	0.000207482				death inducer-obliterator 1	DIDO1	A_23_P395426	0.65912	0.000382717				KDEL (Lys-Asp-Glu-Leu) endoplasmic reticulum protein retention receptor 3	KDELR3	A_23_P211504	-0.647899	0.000424239				uncharacterized LOC100506869	LOC100506869	A_21_P0014577	-0.631143	0.00209317				myoferlin	MYOF	A_23_P354387	-0.646649	1.84332e-05
			ZNF37BP	A_19_P00805840	0.638631	0.00067387				zinc finger protein 585A	ZNF585A	A_23_P90220	0.702719	0.000992246				protein tyrosine phosphatase, receptor type, H	PTPRH	A_23_P101642	0.660888	0.000294118				ribosomal protein L9	RPL9	A_23_P7066	-0.646662	0.00061221				cancer/testis antigen family 45, member A1	CT45A1	A_32_P780817	-0.631131	1.33398e-05						A_24_P186944	-0.646422	0.000158124
		glutamic pyruvate transaminase (alanine aminotransferase) 2	GPT2	A_23_P37892	0.638636	0.000400535				zinc finger protein 26	ZNF26	A_24_P21831	0.702918	2.39537e-05				zinc finger and BTB domain containing 7B	ZBTB7B	A_23_P11729	0.660922	0.00175127				lysophosphatidylcholine acyltransferase 2	LPCAT2	A_23_P141021	-0.645473	1.43833e-05				protocadherin beta 2	PCDHB2	A_23_P213375	-0.62972	0.000530231				cancer/testis antigen family 45, member A5	CT45A5	A_32_P170547	-0.646006	6.72047e-05
		microtubule-associated protein 1 light chain 3 beta	MAP1LC3B	A_23_P77630	0.638885	0.0027241						A_33_P3212839	0.705055	4.69174e-06				DNA cross-link repair 1C	DCLRE1C	A_23_P86632	0.661716	6.15701e-05				sterol O-acyltransferase 1	SOAT1	A_24_P216654	-0.644948	0.000175011				mitogen-activated protein kinase 9	MAPK9	A_23_P167692	-0.629307	0.000529444				Rho guanine nucleotide exchange factor (GEF) 3	ARHGEF3	A_23_P143885	-0.645329	0.000108621
		arginine/serine-rich coiled-coil 2	RSRC2	A_23_P53267	0.638924	5.32335e-05						A_32_P180265	0.705384	1.48232e-05					Q5A5F0	A_19_P00805812	0.661962	0.00154771				phosphoribosyl pyrophosphate amidotransferase	PPAT	A_24_P123347	-0.644617	0.000344358				protein tyrosine phosphatase, non-receptor type 9	PTPN9	A_23_P124486	-0.629239	0.000394666				aldo-keto reductase family 7, member A2 pseudogene 1	AKR7A2P1	A_23_P316812	-0.644098	0.000296694
		zinc finger protein 200	ZNF200	A_23_P152356	0.640298	2.50314e-05				zinc finger, MYM-type 5	ZMYM5	A_24_P321634	0.706694	0.000441694				G protein-coupled receptor kinase 6	GRK6	A_33_P3264875	0.662029	2.28955e-05				component of oligomeric golgi complex 6	COG6	A_23_P53866	-0.644377	7.41587e-05				coiled-coil domain containing 23	CCDC23	A_24_P263937	-0.628533	0.000480135				glucuronidase, beta pseudogene 11	GUSBP11	A_24_P181998	-0.643979	0.00153616
		p53 and DNA-damage regulated 1	PDRG1	A_23_P166159	0.642213	3.41486e-05				transmembrane protein 55B	TMEM55B	A_23_P48610	0.707128	4.50026e-05				tyrosyl-tRNA synthetase	YARS	A_23_P379550	0.6625	0.00718924						A_33_P3253832	-0.643994	0.000602282				nudix (nucleoside diphosphate linked moiety X)-type motif 16	NUDT16	A_23_P310560	-0.628222	9.33708e-05				methyltransferase like 9	METTL9	A_24_P202139	-0.643175	2.25428e-05
				A_33_P3212839	0.64261	1.28997e-05				transmembrane protein 79	TMEM79	A_33_P3320272	0.707727	0.00027211				period homolog 1 (Drosophila)	PER1	A_23_P89589	0.66289	6.54504e-05				integrator complex subunit 8	INTS8	A_23_P43079	-0.643801	7.33828e-05						A_24_P375683	-0.62722	0.0344199				adenosine deaminase, RNA-specific, B1	ADARB1	A_33_P3399061	-0.642894	0.00223277
		asparagine synthetase (glutamine-hydrolyzing)	ASNS	A_23_P145694	0.643152	0.000129775				chromosome 1 open reading frame 135	C1orf135	A_23_P160537	0.70889	1.08733e-05				zinc finger protein 215	ZNF215	A_23_P53057	0.664154	3.15568e-06				transmembrane phosphatase with tensin homology	TPTE	A_33_P3247392	-0.643722	0.000722512				kelch repeat and BTB (POZ) domain containing 4	KBTBD4	A_23_P202696	-0.626922	2.85453e-05				neuregulin 1	NRG1	A_23_P315815	-0.642131	0.000189729
		GrpE-like 2, mitochondrial (E. coli)	GRPEL2	A_23_P404091	0.643496	4.58595e-05				zinc finger protein 212	ZNF212	A_23_P415558	0.709507	2.35085e-05				chromosome 17 open reading frame 51	C17orf51	A_24_P59607	0.664201	7.51182e-06				zinc finger protein 326	ZNF326	A_33_P3301689	-0.643023	5.7722e-06				mitochondrial ribosomal protein L11	MRPL11	A_33_P3228959	-0.62644	7.69364e-06				POTE ankyrin domain family, member F	POTEF	A_24_P59220	-0.639389	0.00106749
		uncharacterized LOC100506870	LOC100506870	A_21_P0010997	0.643616	0.00515684				thrombospondin, type I, domain containing 1	THSD1	A_23_P14184	0.709894	0.0010904				phosphodiesterase 4B, cAMP-specific	PDE4B	A_23_P74278	0.664235	8.09499e-05				adaptor-related protein complex 1, sigma 1 subunit	AP1S1	A_23_P157404	-0.642796	0.0104959				ribosomal RNA processing 15 homolog (S. cerevisiae)	RRP15	A_23_P23356	-0.62559	0.00244202				phospholipase C, epsilon 1	PLCE1	A_33_P3346669	-0.638916	9.97324e-05
				A_33_P3407230	0.643823	0.00270881				RecQ protein-like 5	RECQL5	A_33_P3268974	0.710279	3.59447e-06				interferon regulatory factor 1	IRF1	A_23_P41765	0.665005	1.24335e-05				adenosine deaminase, RNA-specific, B1	ADARB1	A_33_P3399061	-0.641296	0.00227395				protein kinase (cAMP-dependent, catalytic) inhibitor gamma	PKIG	A_23_P91221	-0.625466	0.000808965				potassium channel tetramerisation domain containing 3	KCTD3	A_23_P160406	-0.638841	0.000196454
		alpha 1,4-galactosyltransferase	A4GALT	A_33_P3294002	0.643953	0.00247193				Kruppel-like factor 11	KLF11	A_23_P44505	0.711137	2.00565e-06				aminoglycoside phosphotransferase domain containing 1	AGPHD1	A_33_P3257538	0.665743	0.00138039				mitochondrial ribosomal protein L11	MRPL11	A_33_P3228959	-0.639616	6.12412e-06				platelet-derived growth factor alpha polypeptide	PDGFA	A_33_P3372666	-0.624286	0.00798624				secernin 1	SCRN1	A_33_P3285893	-0.637754	0.000996307
		TBC1 domain family, member 10A	TBC1D10A	A_23_P166421	0.644687	0.000218727				chromosome 17 open reading frame 51	C17orf51	A_19_P00316405	0.711401	4.41587e-06				armadillo repeat containing, X-linked 3	ARMCX3	A_24_P23411	0.665987	9.33613e-05				SWI/SNF related, matrix associated, actin dependent regulator of chromatin, subfamily a, member 2	SMARCA2	A_23_P60354	-0.63954	0.00102597				chromosome 21 open reading frame 91	C21orf91	A_24_P125839	-0.623782	0.000167888				uncharacterized LOC100506965	LOC100506965	A_19_P00800681	-0.637536	0.000464452
		zinc finger and BTB domain containing 7B	ZBTB7B	A_23_P11729	0.645555	0.00208875				tribbles homolog 1 (Drosophila)	TRIB1	A_24_P252497	0.711606	1.47541e-05				chromosome 2 open reading frame 49	C2orf49	A_23_P165698	0.666753	3.79293e-05				3-phosphoinositide dependent protein kinase-1	PDPK1	A_24_P222599	-0.63771	0.000589897				Leo1, Paf1/RNA polymerase II complex component, homolog (S. cerevisiae)	LEO1	A_23_P314222	-0.623744	0.00050065				ras homolog gene family, member C	RHOC	A_23_P406424	-0.635247	6.60479e-05
		protein tyrosine phosphatase, receptor type, H	PTPRH	A_23_P101642	0.645759	0.000361239				TGFB-induced factor homeobox 1	TGIF1	A_23_P153197	0.711738	2.60553e-06				chromosome 14 open reading frame 135	C14orf135	A_33_P3224705	0.667131	7.07241e-06				chromosome 3 open reading frame 39	C3orf39	A_24_P217330	-0.637433	0.00147837				COBW domain containing 5	CBWD5	A_24_P25080	-0.623154	0.00223573				actin binding LIM protein family, member 3	ABLIM3	A_23_P256205	-0.63353	0.000555285
		tripartite motif containing 68	TRIM68	A_23_P2097	0.645913	1.42883e-05				chromosome 17 open reading frame 51	C17orf51	A_19_P00316404	0.712236	9.90321e-06				G protein-coupled receptor 158	GPR158	A_24_P349117	0.668872	5.21908e-05				ribosomal protein L13	RPL13	A_23_P501849	-0.637101	0.000150443				coiled-coil domain containing 28B	CCDC28B	A_23_P62764	-0.621985	1.03499e-05				CUE domain containing 2	CUEDC2	A_23_P127088	-0.632897	2.9949e-05
		zinc finger protein 160	ZNF160	A_24_P241792	0.646014	7.63024e-05				zinc finger protein 567	ZNF567	A_33_P3343750	0.714165	0.000118369				chromosome 17 open reading frame 51	C17orf51	A_19_P00316405	0.669214	8.65213e-06				M-phase phosphoprotein 9	MPHOSPH9	A_24_P398500	-0.636846	5.83464e-05				mastermind-like domain containing 1	MAMLD1	A_23_P251075	-0.621982	0.000405633				glucose 6 phosphatase, catalytic, 3	G6PC3	A_23_P55174	-0.630902	0.000428449
		uncharacterized LOC100499489	LOC100499489	A_21_P0000660	0.646419	0.000610312				asparagine synthetase (glutamine-hydrolyzing)	ASNS	A_23_P145694	0.7142	4.65963e-05				long intergenic non-protein coding RNA 338	LINC00338	A_19_P00316919	0.669381	0.000182889				cathepsin L1 pseudogene 8	CTSL1P8	A_21_P0000597	-0.636339	0.0040397				mitogen-activated protein kinase kinase 6	MAP2K6	A_23_P207445	-0.621325	0.000619307				erythrocyte membrane protein band 4.1 like 4B	EPB41L4B	A_23_P216556	-0.630236	0.000415694
		BMS1 pseudogene 4	BMS1P4	A_33_P3308497	0.646631	0.00017123				chromosome 17 open reading frame 51	C17orf51	A_21_P0011533	0.714858	5.65955e-06				zinc finger protein 615	ZNF615	A_33_P3400424	0.669394	0.000561583				cerebral endothelial cell adhesion molecule	CERCAM	A_33_P3260575	-0.636103	0.00145864				myosin, light chain 9, regulatory	MYL9	A_23_P210425	-0.620832	8.70589e-05				Wolfram syndrome 1 (wolframin)	WFS1	A_23_P121499	-0.630089	0.000189181
		zinc finger protein 557	ZNF557	A_32_P177097	0.647639	1.05841e-05						A_33_P3331652	0.717043	3.52216e-06				zinc finger and BTB domain containing 17	ZBTB17	A_23_P654	0.669956	1.77893e-05				protein tyrosine phosphatase, non-receptor type 9	PTPN9	A_23_P124486	-0.635647	0.000361098				solute carrier family 1 (glial high affinity glutamate transporter), member 3	SLC1A3	A_21_P0000065	-0.619063	0.00522113				DnaJ (Hsp40) homolog, subfamily C, member 13	DNAJC13	A_23_P166910	-0.629291	0.000924817
		zinc finger protein 567	ZNF567	A_33_P3343750	0.648835	0.000287536				zinc finger protein 557	ZNF557	A_32_P177097	0.71788	3.40603e-06				doublecortin-like kinase 1	DCLK1	A_23_P369994	0.67037	1.59361e-05				kelch repeat and BTB (POZ) domain containing 4	KBTBD4	A_23_P202696	-0.635552	2.47781e-05				cytidine monophosphate N-acetylneuraminic acid synthetase	CMAS	A_32_P73045	-0.618916	1.67589e-05				cortexin 1	CTXN1	A_33_P3320953	-0.628506	0.00335587
		Nance-Horan syndrome (congenital cataracts and dental anomalies)	NHS	A_32_P126375	0.648936	9.43105e-05				chromosome 3 open reading frame 19	C3orf19	A_33_P3294881	0.719287	9.51516e-05				zinc finger protein 48	ZNF48	A_23_P415643	0.670793	0.000128076				protein kinase, AMP-activated, alpha 1 catalytic subunit	PRKAA1	A_33_P3312212	-0.635269	0.000611289						A_23_P258108	-0.618568	0.000739754				CASK interacting protein 1	CASKIN1	A_24_P219378	-0.627483	0.00934732
		bromodomain and PHD finger containing, 1	BRPF1	A_23_P250948	0.649553	0.000110832				DnaJ (Hsp40) homolog, subfamily B, member 2	DNAJB2	A_24_P102981	0.719769	3.93327e-05						A_24_P67408	0.67312	0.00278505				origin recognition complex, subunit 2	ORC2	A_33_P3381410	-0.634736	0.00480141				family with sequence similarity 102, member B	FAM102B	A_24_P237927	-0.617233	0.00509515				component of oligomeric golgi complex 6	COG6	A_23_P53866	-0.627326	9.62772e-05
		chromosome 1 open reading frame 135	C1orf135	A_23_P160537	0.649779	2.72613e-05				family with sequence similarity 193, member A	FAM193A	A_23_P121506	0.72189	3.01399e-06				brain expressed X-linked 2	BEX2	A_33_P3245178	0.67393	0.00113133				tubulin, alpha 1c	TUBA1C	A_24_P58529	-0.634656	0.00035069				transmembrane phosphatase with tensin homology	TPTE	A_33_P3247392	-0.616937	0.00102187				NAD(P)H dehydrogenase, quinone 2	NQO2	A_23_P58953	-0.627098	0.000518404
		ribosomal protein S6 kinase, 90kDa, polypeptide 5	RPS6KA5	A_23_P37375	0.649941	2.75999e-05				transforming growth factor beta regulator 1	TBRG1	A_24_P21752	0.722141	0.00100699				mex-3 homolog C (C. elegans)	MEX3C	A_23_P50137	0.674634	0.00109645				TRIM39-RPP21 readthrough	TRIM39-RPP21	A_33_P3879920	-0.633916	1.47011e-05				inhibitor of growth family, member 1	ING1	A_24_P39211	-0.616636	0.000249455				tetratricopeptide repeat domain 35	TTC35	A_23_P60002	-0.623768	0.00242869
		stromal antigen 3-like 4	STAG3L4	A_33_P3373298	0.650564	0.000238248				BTG family, member 2	BTG2	A_23_P62901	0.724596	0.000921746						A_33_P3384694	0.674708	0.000148715				A kinase (PRKA) anchor protein 1	AKAP1	A_32_P132438	-0.632817	0.00219686				hexokinase domain containing 1	HKDC1	A_33_P3335233	-0.616177	0.000247142				regulatory factor X, 5 (influences HLA class II expression)	RFX5	A_24_P20032	-0.623524	0.000125675
			XLOC_l2_001971	A_21_P0010876	0.651209	0.000321503				RAS protein activator like 2	RASAL2	A_23_P502747	0.72477	0.000307723				zinc finger protein 394	ZNF394	A_23_P157416	0.675391	3.75217e-05				protein tyrosine phosphatase, receptor type, f polypeptide (PTPRF), interacting protein (liprin), alpha 1	PPFIA1	A_23_P75516	-0.632777	0.000153296				KIAA1033	KIAA1033	A_23_P394545	-0.615752	0.00123297				mitochondrial ribosomal protein L23	MRPL23	A_23_P105044	-0.623427	8.16866e-06
		ribosomal protein S29	RPS29	A_33_P3282840	0.651627	0.00146058				long intergenic non-protein coding RNA 265	LINC00265	A_32_P191503	0.724866	1.15372e-05				apolipoprotein B mRNA editing enzyme, catalytic polypeptide-like 3C	APOBEC3C	A_23_P120931	0.676337	0.00143497				twinfilin, actin-binding protein, homolog 2 (Drosophila)	TWF2	A_23_P121265	-0.63274	0.000142922				placenta-specific 8	PLAC8	A_24_P183128	-0.615411	0.000280503				mitochondrial ribosomal protein S5	MRPS5	A_23_P28538	-0.623356	0.000198916
		FERM domain containing 5	FRMD5	A_23_P26037	0.651633	9.61348e-05				synaptojanin 1	SYNJ1	A_23_P324718	0.726654	1.80591e-05				forkhead box O3	FOXO3	A_33_P3375665	0.676554	5.68687e-06				coiled-coil domain containing 28B	CCDC28B	A_23_P62764	-0.632369	8.65137e-06				zinc finger protein 326	ZNF326	A_33_P3301689	-0.61464	9.4545e-06				zinc finger, DHHC-type containing 17	ZDHHC17	A_23_P314191	-0.622979	0.00196383
			XLOC_l2_015213	A_21_P0013656	0.652159	0.00232231				uncharacterized LOC100506718	LOC100506718	A_21_P0014535	0.72691	0.000152489				SEC31 homolog A (S. cerevisiae)	SEC31A	A_24_P277349	0.677338	0.00886443				mitogen-activated protein kinase kinase 6	MAP2K6	A_23_P207445	-0.632243	0.000534388				immediate early response 3 interacting protein 1	IER3IP1	A_23_P4474	-0.613721	0.00303852				zinc finger protein 664	ZNF664	A_23_P359655	-0.622117	0.00245993
		family with sequence similarity 60, member A	FAM60A	A_23_P13663	0.652315	0.00129587				follistatin	FST	A_23_P110531	0.72818	6.47854e-05				G protein-coupled receptor kinase 6	GRK6	A_23_P257256	0.677465	8.12087e-06				eukaryotic translation initiation factor 1A, Y-linked	EIF1AY	A_23_P148629	-0.631121	0.000728964					FAM200B	A_19_P00315717	-0.61305	0.000373395					FAM200B	A_19_P00315718	-0.621031	0.000180616
		zinc finger protein 446	ZNF446	A_33_P3263756	0.652542	0.000410148				mohawk homeobox	MKX	A_24_P326491	0.72898	2.83953e-05				denticleless homolog (Drosophila)	DTL	A_23_P10385	0.678833	4.93302e-06				charged multivesicular body protein 2A	CHMP2A	A_23_P153236	-0.630701	1.17063e-05				lysine (K)-specific demethylase 1A	KDM1A	A_24_P74981	-0.612526	0.00031023				hydroxypyruvate isomerase (putative)	HYI	A_23_P160582	-0.619026	0.000171723
		syntaxin 1A (brain)	STX1A	A_23_P168556	0.653182	0.000146971				chromosome 19 open reading frame 68	C19orf68	A_23_P4922	0.73166	4.84127e-06				family with sequence similarity 27, member A	FAM27A	A_33_P3301219	0.679608	2.14814e-05				acyl-CoA binding domain containing 3	ACBD3	A_24_P171182	-0.630177	0.0118902				chaperonin containing TCP1, subunit 8 (theta)	CCT8	A_23_P102876	-0.611135	0.0004211				syntaxin binding protein 1	STXBP1	A_24_P201171	-0.618315	0.000358346
		v-maf musculoaponeurotic fibrosarcoma oncogene homolog K (avian)	MAFK	A_23_P373598	0.653553	2.31201e-05				p53 and DNA-damage regulated 1	PDRG1	A_23_P166159	0.732362	8.53478e-06				small nucleolar RNA host gene 8 (non-protein coding)	SNHG8	A_32_P38467	0.680395	0.000104258				zinc finger, DHHC-type containing 17	ZDHHC17	A_23_P314191	-0.629031	0.00182648				transformer 2 alpha homolog (Drosophila)	TRA2A	A_23_P31389	-0.611112	0.00012164				family with sequence similarity 54, member B	FAM54B	A_23_P97195	-0.618295	0.000731065
		zinc finger protein 567	ZNF567	A_23_P354894	0.653779	0.000749199				interleukin-1 receptor-associated kinase 2	IRAK2	A_33_P3352970	0.732385	3.31762e-05				host cell factor C2	HCFC2	A_23_P25403	0.680431	1.24275e-05				eukaryotic translation initiation factor 1A, X-linked	EIF1AX	A_33_P3361393	-0.627972	5.91946e-05				uncharacterized LOC100506965	LOC100506965	A_19_P00800681	-0.610801	0.000668164				DnaJ (Hsp40) homolog, subfamily A, member 1	DNAJA1	A_24_P9671	-0.617323	0.00104192
			XLOC_l2_010830	A_21_P0012609	0.655171	2.13741e-05				OTU domain containing 1	OTUD1	A_32_P60459	0.73301	5.53053e-06				zinc finger protein 295	ZNF295	A_33_P3281066	0.680835	3.66788e-05				fatty acyl CoA reductase 1	FAR1	A_24_P163920	-0.627118	0.00257116				glutamate decarboxylase 1 (brain, 67kDa)	GAD1	A_33_P3365142	-0.610294	2.31983e-05				FBJ murine osteosarcoma viral oncogene homolog	FOS	A_23_P106194	-0.615983	0.00536011
		family with sequence similarity 60, member A	FAM60A	A_32_P103837	0.655377	3.29232e-06				SLIT-ROBO Rho GTPase activating protein 1	SRGAP1	A_23_P162449	0.73351	0.000308748				pim-3 oncogene	PIM3	A_23_P61398	0.681127	1.90275e-05				gypsy retrotransposon integrase 1	GIN1	A_33_P3382910	-0.62692	0.000191235				SWI5 recombination repair homolog (yeast)	SWI5	A_23_P392222	-0.610223	8.70989e-06				mastermind-like domain containing 1	MAMLD1	A_23_P251075	-0.614087	0.000453213
		polymerase (RNA) III (DNA directed) polypeptide D, 44kDa	POLR3D	A_23_P84565	0.65538	0.00029365				zinc finger protein 215	ZNF215	A_23_P53057	0.733931	1.00433e-06				amphiregulin	AREG	A_23_P259071	0.682194	0.00364222				radixin	RDX	A_23_P203023	-0.626231	0.00490052				prolyl 4-hydroxylase, alpha polypeptide II	P4HA2	A_23_P30363	-0.608673	5.24215e-05				placenta-specific 8	PLAC8	A_24_P183128	-0.613664	0.000287747
		growth arrest-specific 5 (non-protein coding)	GAS5	A_33_P3326285	0.656007	5.9372e-06				cyclin B1 interacting protein 1, E3 ubiquitin protein ligase	CCNB1IP1	A_23_P76882	0.73525	4.88501e-06				SR-related CTD-associated factor 8	SCAF8	A_23_P111303	0.683422	8.69393e-05				tumor necrosis factor (ligand) superfamily, member 10	TNFSF10	A_23_P121253	-0.625592	0.0012769						A_33_P3267865	-0.608485	0.000863115				lymphocyte antigen 6 complex, locus E	LY6E	A_24_P317762	-0.613627	0.00409816
		zinc finger protein 530	ZNF530	A_33_P3299421	0.656139	4.66894e-05				zinc finger protein 805	ZNF805	A_33_P3247599	0.736215	4.89908e-05				myoneurin	MYNN	A_24_P268786	0.686078	0.000139184				eukaryotic translation initiation factor 3, subunit F	EIF3F	A_23_P142776	-0.624768	0.000820124				RAB26, member RAS oncogene family	RAB26	A_33_P3209229	-0.60763	0.00175957				UL16 binding protein 2	ULBP2	A_23_P145485	-0.6131	0.00766647
		four and a half LIM domains 2	FHL2	A_33_P3362321	0.656955	1.41892e-05				four and a half LIM domains 2	FHL2	A_23_P108751	0.736909	5.52026e-06				tubulin folding cofactor C	TBCC	A_24_P397584	0.687136	0.000233467				myeloid/lymphoid or mixed-lineage leukemia (trithorax homolog, Drosophila); translocated to, 3	MLLT3	A_23_P216693	-0.6243	3.08433e-05				netrin 4	NTN4	A_23_P204630	-0.606991	0.00412477				PNN-interacting serine/arginine-rich protein	PNISR	A_23_P122615	-0.61219	0.000149644
		nuclear receptor subfamily 4, group A, member 3	NR4A3	A_23_P398566	0.657374	0.00010786				spermatogenesis associated 2-like	SPATA2L	A_33_P3288364	0.737313	1.32146e-05				spermatogenesis associated 2-like	SPATA2L	A_33_P3288364	0.68744	2.75883e-05				RNA binding protein with multiple splicing	RBPMS	A_23_P71316	-0.624148	2.55173e-05				cortexin 1	CTXN1	A_33_P3320953	-0.605813	0.00431875				myeloma overexpressed (in a subset of t(11;14) positive multiple myelomas)	MYEOV	A_23_P360240	-0.61155	2.33251e-05
		neuralized homolog (Drosophila)	NEURL	A_33_P3293524	0.657542	7.62191e-05						A_32_P40375	0.737475	3.2999e-06				zinc finger protein 295	ZNF295	A_24_P339869	0.687987	9.2635e-05				bone morphogenetic protein 7	BMP7	A_23_P68487	-0.622982	5.97134e-05				RAB5B, member RAS oncogene family	RAB5B	A_23_P410998	-0.605294	0.000710381				A kinase (PRKA) anchor protein 1	AKAP1	A_32_P132438	-0.611364	0.00282146
		forkhead box O3	FOXO3	A_33_P3375665	0.657888	7.73083e-06				zinc finger protein 263	ZNF263	A_23_P140978	0.737885	0.000126322				ADP-ribosylation factor-like 13B	ARL13B	A_23_P10081	0.688258	0.00271611				intraflagellar transport 20 homolog (Chlamydomonas)	IFT20	A_23_P130089	-0.622326	0.000643996				nucleolar protein 10	NOL10	A_24_P384755	-0.605229	0.000588381				mannose-6-phosphate receptor (cation dependent)	M6PR	A_23_P204252	-0.610936	0.00590097
		GABA(A) receptor-associated protein like 1	GABARAPL1	A_33_P3812669	0.659732	5.90484e-06				family with sequence similarity 157, member B	FAM157B	A_21_P0013914	0.738576	2.54631e-05				zinc finger protein 700	ZNF700	A_23_P27636	0.688536	0.000221883				transforming, acidic coiled-coil containing protein 2	TACC2	A_23_P127186	-0.621755	0.00226781				neuregulin 1	NRG1	A_33_P3284345	-0.604354	0.00486745						A_33_P3219105	-0.610852	0.0119666
		SET domain containing (lysine methyltransferase) 7	SETD7	A_33_P3255229	0.660004	6.99904e-05				chromosome 7 open reading frame 74	C7orf74	A_23_P406616	0.738686	7.61536e-05				zinc finger protein 485	ZNF485	A_23_P115861	0.688573	0.000140598				NADH dehydrogenase (ubiquinone) 1 beta subcomplex, 5, 16kDa	NDUFB5	A_33_P3340164	-0.621439	0.00106269						A_24_P375599	-0.602102	0.00132823				family with sequence similarity 105, member A	FAM105A	A_23_P133438	-0.610584	0.000416767
		msh homeobox 2 pseudogene 1	MSX2P1	A_32_P169179	0.660579	6.72098e-06				unc-51-like kinase 1 (C. elegans)	ULK1	A_24_P73370	0.742943	6.27169e-05				BRF2, subunit of RNA polymerase III transcription initiation factor, BRF1-like	BRF2	A_23_P20480	0.690983	1.16592e-05				mannose-6-phosphate receptor (cation dependent)	M6PR	A_23_P204252	-0.620961	0.00531003				programmed cell death 2-like	PDCD2L	A_23_P27947	-0.602079	7.90376e-05				3-phosphoinositide dependent protein kinase-1	PDPK1	A_24_P222599	-0.609734	0.000856192
		RecQ protein-like 5	RECQL5	A_33_P3268974	0.662276	7.79572e-06				zinc finger protein 367	ZNF367	A_32_P183218	0.743207	0.000213142				zinc finger and BTB domain containing 43	ZBTB43	A_33_P3349414	0.691151	0.000136682				anillin, actin binding protein	ANLN	A_23_P356684	-0.619362	0.00627578				exocyst complex component 3	EXOC3	A_23_P93046	-0.601566	0.0122732				hyaluronan binding protein 4	HABP4	A_33_P3592015	-0.609625	0.00470538
		surfeit 6	SURF6	A_24_P21447	0.662491	1.98358e-05					MTRNR2L9	A_21_P0000109	0.743772	0.0302816					SNHG11	A_19_P00318013	0.691613	0.000106345				LysM, putative peptidoglycan-binding, domain containing 4	LYSMD4	A_23_P117734	-0.619339	6.614e-05				NADH dehydrogenase (ubiquinone) Fe-S protein 6, 13kDa (NADH-coenzyme Q reductase)	NDUFS6	A_23_P122228	-0.600397	1.35152e-05				coiled-coil domain containing 23	CCDC23	A_24_P263937	-0.608713	0.000630426
		chromosome 19 open reading frame 68	C19orf68	A_23_P4922	0.662852	1.41774e-05				transmembrane protein, adipocyte asscociated 1	TPRA1	A_33_P3399373	0.745884	5.76291e-05				VGF nerve growth factor inducible	VGF	A_33_P3276703	0.691625	5.81197e-05				carboxypeptidase, vitellogenic-like	CPVL	A_23_P134347	-0.616971	0.000201622					FAM200B	A_19_P00315718	-0.600219	0.00024688				chromosome 3 open reading frame 75	C3orf75	A_33_P3348313	-0.608407	0.000177193
		enhancer of zeste homolog 1 (Drosophila)	EZH1	A_23_P428219	0.662918	0.000264374				cytoplasmic polyadenylation element binding protein 2	CPEB2	A_32_P225355	0.747222	0.000349546				uncharacterized LOC400099	LOC400099	A_32_P192594	0.691845	0.00059558				THO complex 3	THOC3	A_33_P3336642	-0.615983	0.000333363				chromosome 4 open reading frame 27	C4orf27	A_24_P49371	-0.600189	0.00413493						A_33_P3397298	-0.608224	0.0010677
		zinc finger protein 841	ZNF841	A_23_P27404	0.663254	6.73209e-05				forkhead box O3	FOXO3	A_33_P3375665	0.749245	1.80358e-06				zinc finger, MYM-type 5	ZMYM5	A_23_P65208	0.694725	8.61022e-05				aldo-keto reductase family 7, member A3 (aflatoxin aldehyde reductase)	AKR7A3	A_23_P103968	-0.615936	2.25311e-05				cancer/testis antigen family 45, member A5	CT45A5	A_32_P170547	-0.600162	0.000136808				cytidine monophosphate N-acetylneuraminic acid synthetase	CMAS	A_32_P73045	-0.608196	2.0144e-05
		jumonji C domain containing histone demethylase 1 homolog D (S. cerevisiae)	JHDM1D	A_23_P359897	0.66388	4.45392e-05				spermine oxidase	SMOX	A_23_P102731	0.749418	0.000491339				zinc finger protein 670	ZNF670	A_23_P74981	0.695136	0.000352114				NAD(P)H dehydrogenase, quinone 2	NQO2	A_23_P58953	-0.615386	0.000608325				zinc finger, DHHC-type containing 17	ZDHHC17	A_23_P314191	-0.598804	0.00262563				PHD finger protein 15	PHF15	A_23_P416434	-0.606395	0.000224611
		nuclear receptor subfamily 1, group D, member 2	NR1D2	A_24_P943472	0.664002	7.84004e-05				proline-rich nuclear receptor coactivator 1	PNRC1	A_23_P145074	0.751669	2.39787e-05				eukaryotic translation initiation factor 3, subunit K	EIF3K	A_24_P330971	0.695569	0.000185617				long intergenic non-protein coding RNA 470	LINC00470	A_33_P3250553	-0.614778	8.91368e-05				neurofibromin 1	NF1	A_21_P0012236	-0.598592	0.00632286				TAF9 RNA polymerase II, TATA box binding protein (TBP)-associated factor, 32kDa	TAF9	A_32_P90210	-0.606077	2.30967e-05
		phosphodiesterase 9A	PDE9A	A_33_P3419594	0.665326	0.000709793				solute carrier family 38, member 2	SLC38A2	A_24_P295963	0.752019	0.000620002				chromosome 17 open reading frame 51	C17orf51	A_21_P0011533	0.695639	7.63354e-06				aminolevulinate, delta-, synthase 1	ALAS1	A_24_P191588	-0.612897	8.46476e-05				CD109 molecule	CD109	A_23_P331928	-0.598337	0.000706044				acyl-CoA dehydrogenase, short/branched chain	ACADSB	A_33_P3248992	-0.605165	7.36259e-05
		junction mediating and regulatory protein, p53 cofactor	JMY	A_33_P3217689	0.665414	0.000235739				uncharacterized LOC100499489	LOC100499489	A_21_P0000660	0.752398	0.000158163				N(alpha)-acetyltransferase 16, NatA auxiliary subunit	NAA16	A_33_P3361811	0.696179	6.9875e-05				FK506 binding protein 1A, 12kDa	FKBP1A	A_33_P3227345	-0.612621	0.000383956				adaptor protein, phosphotyrosine interaction, PH domain and leucine zipper containing 1	APPL1	A_23_P166663	-0.597363	0.00255741				surfactant protein A2	SFTPA2	A_33_P3344574	-0.604995	0.000306437
			XLOC_000302	A_21_P0001343	0.665681	0.00177282				zinc finger protein 501	ZNF501	A_33_P3257856	0.75782	2.19348e-05				zinc finger protein 585A	ZNF585A	A_23_P90220	0.696184	0.00106937				methyltransferase like 7A	METTL7A	A_23_P415021	-0.612489	0.00308698				glucuronidase, beta pseudogene 11	GUSBP11	A_24_P181998	-0.59674	0.00270579				caveolin 2	CAV2	A_24_P925040	-0.604677	0.00152283
		ubiquitin specific peptidase 37	USP37	A_24_P109082	0.666402	6.43136e-05				zinc finger protein 416	ZNF416	A_23_P55688	0.758231	2.67234e-06				neuregulin 1	NRG1	A_33_P3392192	0.696352	4.69202e-05					XLOC_012754	A_21_P0009522	-0.61219	0.000876244				angiomotin like 1	AMOTL1	A_24_P401768	-0.594845	0.00174716				adaptor-related protein complex 1, sigma 2 subunit	AP1S2	A_33_P3258782	-0.603193	2.36558e-05
		nuclear factor of kappa light polypeptide gene enhancer in B-cells 1	NFKB1	A_23_P30024	0.667531	0.000100667				zinc finger protein 845	ZNF845	A_32_P207428	0.758518	4.75092e-07				zinc finger and BTB domain containing 8A	ZBTB8A	A_33_P3475737	0.696967	0.000277629				IWS1 homolog (S. cerevisiae)	IWS1	A_23_P165574	-0.612013	2.75373e-05				procollagen C-endopeptidase enhancer 2	PCOLCE2	A_23_P57709	-0.594758	0.000211587				LSM10, U7 small nuclear RNA associated	LSM10	A_24_P216681	-0.603037	7.36132e-05
		Sp2 transcription factor	SP2	A_23_P381449	0.667979	0.000309776				zinc finger protein 182	ZNF182	A_32_P43465	0.759001	4.25748e-05				SIN3 homolog A, transcription regulator (yeast)	SIN3A	A_23_P367676	0.69886	4.63825e-05				histone cluster 1, H3b	HIST1H3B	A_23_P93258	-0.611579	0.00889824				neuregulin 1	NRG1	A_23_P315815	-0.594445	0.000380125				KTI12 homolog, chromatin associated (S. cerevisiae)	KTI12	A_23_P103276	-0.602353	0.000106938
		BRF2, subunit of RNA polymerase III transcription initiation factor, BRF1-like	BRF2	A_23_P20480	0.670013	1.61953e-05				zinc finger and BTB domain containing 17	ZBTB17	A_23_P654	0.759667	4.5548e-06						A_33_P3331652	0.70204	4.46126e-06				blocked early in transport 1 homolog (S. cerevisiae)	BET1	A_24_P269432	-0.611177	0.000622721				eukaryotic translation initiation factor 3, subunit F	EIF3F	A_23_P142776	-0.59438	0.00122416				TBC1 domain family, member 23	TBC1D23	A_23_P212728	-0.602041	0.00184356
		fem-1 homolog b (C. elegans)	FEM1B	A_23_P151970	0.670319	1.53343e-05				jun B proto-oncogene	JUNB	A_24_P241815	0.761937	8.27458e-05				mohawk homeobox	MKX	A_24_P326491	0.70208	4.17026e-05				acyl-CoA synthetase medium-chain family member 3	ACSM3	A_23_P317756	-0.608496	0.00286853				mitochondrial ribosomal protein L36	MRPL36	A_24_P371758	-0.594137	0.000139489				family with sequence similarity 114, member A2	FAM114A2	A_23_P41908	-0.60006	0.00024518
		tetratricopeptide repeat, ankyrin repeat and coiled-coil containing 2	TANC2	A_24_P942068	0.671676	9.62984e-06				serine peptidase inhibitor, Kazal type 5	SPINK5	A_33_P3391126	0.763075	6.01003e-06				ring finger protein 19A	RNF19A	A_24_P411899	0.703182	0.000145354				mitochondrial ribosomal protein S5	MRPS5	A_23_P28538	-0.608339	0.000248554				phosphorylase kinase, gamma 2 (testis)	PHKG2	A_24_P296457	-0.59412	0.000588239				ras-related C3 botulinum toxin substrate 1 (rho family, small GTP binding protein Rac1)	RAC1	A_23_P215406	-0.599038	2.93952e-05
		DnaJ (Hsp40) homolog, subfamily B, member 9	DNAJB9	A_23_P258944	0.671743	0.000151006				chromosome 6 open reading frame 48	C6orf48	A_33_P3353051	0.763414	0.000109376				jun B proto-oncogene	JUNB	A_24_P241815	0.704668	0.000174129				zinc finger CCCH-type containing 13	ZC3H13	A_33_P3281139	-0.607197	0.00293099				protein phosphatase 1, catalytic subunit, gamma isozyme	PPP1CC	A_24_P386771	-0.594003	0.00058312					FAM200B	A_19_P00322856	-0.598606	0.00104014
				A_33_P3360867	0.671932	0.00225781				ubiquitin specific peptidase 37	USP37	A_24_P109082	0.765361	1.5546e-05				transmembrane protein 222	TMEM222	A_33_P3259722	0.705697	0.00225598				succinate dehydrogenase complex, subunit A, flavoprotein (Fp) pseudogene	LOC220729	A_32_P227845	-0.604935	0.000654772				family with sequence similarity 84, member A	FAM84A	A_24_P413920	-0.593812	0.00103125				glycogen synthase kinase 3 beta	GSK3B	A_23_P251342	-0.597706	1.59785e-05
		zinc finger protein 263	ZNF263	A_23_P140978	0.671983	0.000299229				zinc finger protein 383	ZNF383	A_23_P319013	0.765974	1.15092e-05				CD81 molecule	CD81	A_23_P13425	0.706387	0.000528353				unc-5 homolog B (C. elegans)	UNC5B	A_23_P52336	-0.604579	0.000125058				M-phase phosphoprotein 9	MPHOSPH9	A_24_P398500	-0.593518	0.000115949				FAD1 flavin adenine dinucleotide synthetase homolog (S. cerevisiae)	FLAD1	A_23_P34527	-0.596687	2.52707e-05
		uncharacterized LOC439951	LOC439951	A_24_P203953	0.675689	0.0194616				ras homolog gene family, member B	RHOB	A_33_P3398862	0.766644	7.12107e-05				four and a half LIM domains 2	FHL2	A_33_P3362321	0.707067	6.40438e-06				complement component 4 binding protein, beta	C4BPB	A_23_P319598	-0.604561	0.023119					XLOC_007348	A_21_P0006347	-0.592979	0.000232581				solute carrier family 30 (zinc transporter), member 6	SLC30A6	A_24_P342807	-0.596591	0.00028992
		forkhead box O3	FOXO3	A_33_P3240392	0.676123	5.7458e-06				adrenomedullin	ADM	A_23_P127948	0.76692	0.000154677				tetratricopeptide repeat, ankyrin repeat and coiled-coil containing 2	TANC2	A_24_P942068	0.707139	5.48575e-06				nibrin	NBN	A_24_P278126	-0.602565	0.00342021				transmembrane protein 199	TMEM199	A_23_P27048	-0.591584	5.21841e-05				nuclear receptor subfamily 1, group H, member 3	NR1H3	A_33_P3237775	-0.596573	0.000102416
		dual specificity phosphatase 4	DUSP4	A_23_P134935	0.676218	4.11668e-05				v-maf musculoaponeurotic fibrosarcoma oncogene homolog F (avian)	MAFF	A_23_P103110	0.767928	0.000878953				WD repeat domain 33	WDR33	A_33_P3335845	0.707223	0.000263461					XLOC_l2_003627	A_21_P0011123	-0.60248	8.17303e-05				coiled-coil domain containing 25	CCDC25	A_23_P71300	-0.590858	1.60158e-05				exosome component 1	EXOSC1	A_23_P35591	-0.596236	2.02483e-05
		TATA box binding protein (TBP)-associated factor, RNA polymerase I, D, 41kDa	TAF1D	A_24_P261383	0.678577	0.000901308				chromosome 6 open reading frame 48	C6orf48	A_23_P122531	0.768386	5.81418e-06				Mdm4 p53 binding protein homolog (mouse)	MDM4	A_23_P103503	0.707328	0.000160638				tubulin, beta class I	TUBB	A_23_P81912	-0.602004	3.54575e-05				Shwachman-Bodian-Diamond syndrome pseudogene 1	SBDSP1	A_33_P3364205	-0.590154	0.0022527				phospholipase C, epsilon 1	PLCE1	A_23_P35617	-0.595693	0.000271429
		zinc finger protein 274	ZNF274	A_23_P153251	0.679113	4.03955e-05				YY1 associated factor 2	YAF2	A_33_P3390456	0.768717	5.342e-05				solute carrier family 6 (neurotransmitter transporter, glycine), member 9	SLC6A9	A_33_P3402615	0.707674	0.000131318				N-ethylmaleimide-sensitive factor	NSF	A_33_P3284108	-0.601723	0.000530363				ISY1 splicing factor homolog (S. cerevisiae)	ISY1	A_23_P124164	-0.588225	0.0025029				myeloid/lymphoid or mixed-lineage leukemia 3	MLL3	A_33_P3321275	-0.595345	0.00236386
		zinc finger protein 283	ZNF283	A_23_P94911	0.680349	9.00782e-05				zinc finger and BTB domain containing 5	ZBTB5	A_23_P216476	0.769499	7.35959e-06				mediator complex subunit 10	MED10	A_23_P124024	0.709189	0.000241304				family with sequence similarity 104, member B	FAM104B	A_21_P0013993	-0.601517	0.000140066					XLOC_l2_003627	A_21_P0011123	-0.587701	0.000103951				chromosome 9 open reading frame 85	C9orf85	A_33_P3409506	-0.594538	0.000388264
		zinc finger protein 600	ZNF600	A_24_P178602	0.680372	0.000120107				chromosome 9 open reading frame 91	C9orf91	A_24_P915196	0.769995	5.70682e-06				zinc finger protein 7	ZNF7	A_23_P255805	0.709348	3.18893e-06				wntless homolog (Drosophila)	WLS	A_33_P3280721	-0.600574	0.000966659				serine palmitoyltransferase, small subunit A	SPTSSA	A_23_P311150	-0.587471	0.00011449				Ts translation elongation factor, mitochondrial	TSFM	A_21_P0000090	-0.59429	0.00581378
		junction mediating and regulatory protein, p53 cofactor	JMY	A_32_P176550	0.680617	3.46804e-05				chromosome 17 open reading frame 51	C17orf51	A_24_P59607	0.770548	1.41467e-06						A_24_P417606	0.709756	2.46783e-05				RAB GTPase activating protein 1-like	RABGAP1L	A_24_P316005	-0.59993	0.000593564				eukaryotic translation elongation factor 1 beta 2	EEF1B2	A_32_P49616	-0.587061	0.000653345				NAD synthetase 1	NADSYN1	A_23_P35848	-0.594056	0.00116619
		nuclear receptor coactivator 7	NCOA7	A_24_P12435	0.680974	1.27145e-05				splicing factor proline/glutamine-rich	SFPQ	A_21_P0014601	0.770558	0.000445678						A_33_P3250750	0.710636	8.78411e-05				mastermind-like domain containing 1	MAMLD1	A_23_P251075	-0.598834	0.000562139						A_33_P3269049	-0.586193	0.00411618				SEC24 family, member A (S. cerevisiae)	SEC24A	A_33_P3331085	-0.592012	0.00423478
		TAF8 RNA polymerase II, TATA box binding protein (TBP)-associated factor, 43kDa	TAF8	A_33_P3367994	0.681576	0.00018922				nuclear factor of kappa light polypeptide gene enhancer in B-cells 1	NFKB1	A_23_P30024	0.771727	2.35001e-05				GABA(A) receptor-associated protein like 1	GABARAPL1	A_33_P3812669	0.710822	2.56433e-06				leucine zipper, putative tumor suppressor 1	LZTS1	A_23_P20443	-0.598225	0.000872688				polymerase (RNA) III (DNA directed) polypeptide B	POLR3B	A_24_P321626	-0.585198	0.000372519				lysophosphatidylcholine acyltransferase 2	LPCAT2	A_23_P141021	-0.591266	3.58934e-05
		family with sequence similarity 100, member A	FAM100A	A_23_P402787	0.681593	9.26405e-05					LOC148189	A_19_P00322711	0.772616	8.18781e-07				SCAN domain containing 2 pseudogene	SCAND2	A_23_P205875	0.711309	3.05571e-05				placenta-specific 8	PLAC8	A_24_P183128	-0.598121	0.000361401				cytoplasmic polyadenylation element binding protein 4	CPEB4	A_23_P251937	0.585548	1.05422e-05				C2CD2-like	C2CD2L	A_23_P353056	-0.591227	0.000218277
				A_32_P88349	0.682053	0.00340576				long intergenic non-protein coding RNA 338	LINC00338	A_19_P00316919	0.772885	4.54911e-05				yippee-like 5 (Drosophila)	YPEL5	A_33_P3281408	0.71132	8.39937e-05				tubulin, alpha 1a	TUBA1A	A_23_P139547	-0.59784	0.000773357				retinol saturase (all-trans-retinol 13,14-reductase)	RETSAT	A_23_P209944	0.585706	4.56005e-05				THO complex 5	THOC5	A_23_P109470	-0.590714	0.0155512
		zinc finger protein 48	ZNF48	A_23_P415643	0.682527	0.000108555				thioredoxin-like 4B	TXNL4B	A_24_P399083	0.773617	4.42523e-05				uncharacterized LOC100499489	LOC100499489	A_21_P0000660	0.713489	0.000257745				protein phosphatase 1, regulatory subunit 9A	PPP1R9A	A_33_P3286937	-0.597597	0.00208547						A_33_P3296852	0.586419	0.000324778				reticulon 4 interacting protein 1	RTN4IP1	A_23_P122775	-0.590508	6.70921e-05
		metallothionein 1F	MT1F	A_23_P15174	0.683893	0.000575027				zinc finger CCCH-type containing 12C	ZC3H12C	A_23_P388993	0.773698	5.87216e-06				histone cluster 2, H2aa4	HIST2H2AA4	A_23_P309381	0.714921	0.00195363				phosphorylase kinase, gamma 2 (testis)	PHKG2	A_24_P296457	-0.597194	0.000563098				runt-related transcription factor 1	RUNX1	A_33_P3211804	0.586608	0.0166366				HAUS augmin-like complex, subunit 7	HAUS7	A_23_P416034	-0.590295	0.000224758
		regulator of G-protein signaling 16	RGS16	A_23_P320578	0.684153	0.00157535				sterile alpha motif domain containing 4A	SAMD4A	A_33_P3264926	0.774078	9.28039e-05				dual specificity phosphatase 5	DUSP5	A_23_P150018	0.715508	5.16997e-06				RPL36A-HNRNPH2 readthrough	RPL36A-HNRNPH2	A_33_P3255647	-0.597166	0.0074547				regulator of G-protein signaling 2, 24kDa	RGS2	A_23_P114947	0.587101	0.000783278				Sec61 alpha 1 subunit (S. cerevisiae)	SEC61A1	A_23_P212458	-0.590046	0.000102855
		ubiquitin specific peptidase 31	USP31	A_23_P206612	0.684433	4.60514e-05				small nucleolar RNA host gene 5 (non-protein coding)	SNHG5	A_19_P00322754	0.77528	1.74583e-05				zinc finger protein 182	ZNF182	A_32_P43465	0.715549	7.6555e-05				glucuronidase, beta pseudogene 11	GUSBP11	A_24_P181998	-0.596743	0.0027057					XLOC_010097	A_21_P0007712	0.587785	0.00593677				Rab geranylgeranyltransferase, beta subunit	RABGGTB	A_24_P336705	-0.589386	0.00185117
		zinc finger protein 300	ZNF300	A_23_P110699	0.684759	5.40646e-06				SCAN domain containing 2 pseudogene	SCAND2	A_23_P205875	0.776562	1.21541e-05				activating transcription factor 4 (tax-responsive enhancer element B67)	ATF4	A_23_P120933	0.715865	2.8096e-05				checkpoint kinase 1	CHEK1	A_33_P3349536	-0.596725	0.00017542				UDP-GlcNAc:betaGal beta-1,3-N-acetylglucosaminyltransferase 5	B3GNT5	A_23_P18372	0.588795	0.000285191				rabaptin, RAB GTPase binding effector protein 1	RABEP1	A_33_P3275998	-0.58792	0.00066419
		ring finger protein 44	RNF44	A_23_P213592	0.685571	8.45525e-06				family with sequence similarity 100, member B	FAM100B	A_24_P194714	0.777754	0.000154179				zinc finger protein 777	ZNF777	A_23_P309803	0.716032	8.92098e-05				TPTE pseudogene	psiTPTE22	A_21_P0012240	-0.596556	0.00673467				family with sequence similarity 118, member A	FAM118A	A_33_P3252809	0.588871	0.00103088				3-hydroxyisobutyrate dehydrogenase	HIBADH	A_23_P335428	-0.587279	0.000124851
		F-box protein 8	FBXO8	A_23_P136012	0.6861	0.00017983				VGF nerve growth factor inducible	VGF	A_33_P3276703	0.778941	1.71636e-05				cat eye syndrome chromosome region, candidate 7 (non-protein coding)	CECR7	A_33_P3262625	0.716199	1.81753e-05				abhydrolase domain containing 15	ABHD15	A_33_P3216913	-0.59478	0.000344513					KIAA0040	A_19_P00315506	0.588916	0.0061071				eukaryotic translation initiation factor 1A, Y-linked	EIF1AY	A_23_P148629	-0.586577	0.001314
		epithelial mitogen homolog (mouse)	EPGN	A_24_P205994	0.686228	0.000350597				zinc finger protein 839 pseudogene	LOC389906	A_33_P3325229	0.781183	0.00146592				cirrhosis, autosomal recessive 1A (cirhin)	CIRH1A	A_24_P25346	0.716666	0.0002581				solute carrier family 12 (potassium/chloride transporters), member 9	SLC12A9	A_33_P3229181	-0.592529	0.000143573				male germ cell-associated kinase	MAK	A_24_P363278	0.589696	5.94317e-05				fatty acyl CoA reductase 1	FAR1	A_24_P163920	-0.586321	0.004119
		activating transcription factor 7 interacting protein	ATF7IP	A_23_P112950	0.686379	0.000183372				zinc finger protein 766	ZNF766	A_33_P3349716	0.7815	8.61758e-06				small nucleolar RNA host gene 5 (non-protein coding)	SNHG5	A_19_P00322702	0.717805	2.83513e-05					XLOC_002996	A_21_P0003091	-0.591958	0.00227259						A_33_P3321906	0.590076	0.000647561				unc-5 homolog B (C. elegans)	UNC5B	A_23_P52336	-0.585835	0.000168192
		ring finger protein 138	RNF138	A_23_P89755	0.686405	0.000155399				zinc finger protein 345	ZNF345	A_33_P3318596	0.7819	4.62922e-05				TGFB-induced factor homeobox 1	TGIF1	A_21_P0000192	0.718143	1.53038e-06				SEC24 family, member A (S. cerevisiae)	SEC24A	A_33_P3331085	-0.591423	0.00426338						A_33_P3253214	0.590338	0.0314241				chromosome 18 open reading frame 32	C18orf32	A_24_P271049	-0.585104	0.00011334
		chromosome 10 open reading frame 28	C10orf28	A_33_P3228872	0.688091	8.67146e-06				zinc finger protein 841	ZNF841	A_23_P27404	0.78401	1.20118e-05				cyclin B1 interacting protein 1, E3 ubiquitin protein ligase	CCNB1IP1	A_23_P76882	0.71984	6.17336e-06				TAF9 RNA polymerase II, TATA box binding protein (TBP)-associated factor, 32kDa	TAF9	A_32_P90210	-0.591159	2.98995e-05				uncharacterized LOC388796	LOC388796	A_19_P00317793	0.59188	1.45419e-05				family with sequence similarity 60, member A	FAM60A	A_23_P13663	0.585053	0.00292075
		pancreatic progenitor cell differentiation and proliferation factor homolog (zebrafish)	PPDPF	A_33_P3218797	0.688782	0.025684				family with sequence similarity 24, member B	FAM24B	A_21_P0000707	0.785064	7.75213e-07				polo-like kinase 3	PLK3	A_23_P51646	0.72092	3.20618e-06				TBC1 domain family, member 23	TBC1D23	A_23_P212728	-0.590332	0.00213442				zinc finger protein 469	ZNF469	A_32_P116556	0.592838	1.21062e-05						A_33_P3417589	0.585132	0.00264167
		coiled-coil domain containing 130	CCDC130	A_23_P101461	0.689075	0.000126724				TSC22 domain family, member 1	TSC22D1	A_33_P3296205	0.786778	3.31111e-06				YTH domain family, member 2	YTHDF2	A_33_P3346841	0.721149	8.4219e-05				chromosome 21 open reading frame 119	C21orf119	A_23_P29029	-0.590135	0.0014356				solute carrier family 22, member 15	SLC22A15	A_23_P388900	0.592852	9.47838e-05					LOC100499467	A_19_P00319646	0.585947	0.000953812
		transducer of ERBB2, 2 pseudogene 1	TOB2P1	A_33_P3348011	0.689142	0.000376504				cell death-inducing DFFA-like effector c pseudogene	CIDECP	A_24_P484797	0.786925	1.98377e-05				chromosome 7 open reading frame 74	C7orf74	A_23_P406616	0.723018	9.38242e-05				protocadherin beta 2	PCDHB2	A_24_P251962	-0.58999	0.00330202				FBJ murine osteosarcoma viral oncogene homolog B	FOSB	A_23_P429998	0.593249	0.00233123				ribosomal protein S9	RPS9	A_33_P3303015	0.586138	7.79036e-05
			XLOC_005220	A_21_P0004868	0.689257	0.000843143				GLIS family zinc finger 2	GLIS2	A_33_P3333224	0.789163	0.00128232				zinc finger protein 572	ZNF572	A_23_P301360	0.723504	0.000109416				chromobox homolog 1	CBX1	A_24_P298174	-0.589746	0.014486				solute carrier family 38, member 2	SLC38A2	A_23_P218079	0.593767	0.00913511						A_33_P3464900	0.586259	0.00274267
		LON peptidase N-terminal domain and ring finger 3	LONRF3	A_23_P114414	0.689339	2.31386e-05				zinc finger, MYM-type 5	ZMYM5	A_23_P65208	0.789841	2.36426e-05				fibrosin-like 1	FBRSL1	A_21_P0014039	0.723817	0.000107698				replication factor C (activator 1) 5, 36.5kDa	RFC5	A_23_P95302	-0.589467	0.000897682				tripartite motif containing 41	TRIM41	A_33_P3354434	0.593852	0.0110494				zinc finger protein 469	ZNF469	A_32_P116556	0.586474	1.35873e-05
		zinc finger protein 12	ZNF12	A_23_P31335	0.690237	3.03543e-05				zinc finger protein 136	ZNF136	A_23_P67312	0.791047	7.78612e-06				bromodomain and PHD finger containing, 1	BRPF1	A_23_P250948	0.725166	3.73321e-05				tropomyosin 1 (alpha)	TPM1	A_33_P3335966	-0.589452	2.41503e-05				calmegin	CLGN	A_23_P18684	0.594046	0.000234747				signal transducer and activator of transcription 3 (acute-phase response factor)	STAT3	A_24_P116805	0.586671	1.11898e-05
		TCDD-inducible poly(ADP-ribose) polymerase	TIPARP	A_23_P143845	0.691627	3.26204e-06				zinc finger protein 670	ZNF670	A_23_P74981	0.792232	0.0001055				protein-L-isoaspartate (D-aspartate) O-methyltransferase	PCMT1	A_24_P283320	0.725296	0.0024455						A_24_P58187	-0.589375	0.0278177				uncharacterized LOC388796	LOC388796	A_19_P00322220	0.595169	2.44629e-05				erythrocyte membrane protein band 4.1-like 2	EPB41L2	A_23_P134109	0.587663	2.0522e-05
		YjeF N-terminal domain containing 3	YJEFN3	A_33_P3382944	0.69276	0.00820705				zinc finger protein 181	ZNF181	A_23_P50735	0.793022	9.19539e-05				BTG family, member 2	BTG2	A_23_P62901	0.725435	0.00091314				LSM10, U7 small nuclear RNA associated	LSM10	A_24_P216681	-0.587385	9.51005e-05				long intergenic non-protein coding RNA 338	LINC00338	A_32_P8529	0.595654	0.000644159						A_33_P3348323	0.58861	0.000525752
			XLOC_l2_001206	A_21_P0010663	0.694245	0.00126403				EPB41L4A antisense RNA 1 (non-protein coding)	EPB41L4A-AS1	A_23_P58538	0.793775	4.47244e-06				zinc finger, MYM-type 5	ZMYM5	A_24_P321634	0.725494	0.0003511				eukaryotic translation elongation factor 1 beta 2	EEF1B2	A_32_P49616	-0.587062	0.000653339				transmembrane protein 222	TMEM222	A_33_P3259722	0.596922	0.00703712					ZNF805	A_19_P00812349	0.589049	0.000136528
		MT-RNR2-like 7	MTRNR2L7	A_21_P0000107	0.69451	0.0348756				zinc finger protein 700	ZNF700	A_23_P27636	0.794354	5.66082e-05				zinc finger protein 566	ZNF566	A_23_P306956	0.726326	6.82128e-06				cellular retinoic acid binding protein 1	CRABP1	A_33_P3326483	-0.586728	0.000267079				ribosomal L24 domain containing 1	RSL24D1	A_23_P65768	0.597596	0.00166728				KIAA0141	KIAA0141	A_24_P63563	0.589053	2.69659e-05
		basic helix-loop-helix family, member e23	BHLHE23	A_24_P57898	0.69656	0.00393297				GrpE-like 2, mitochondrial (E. coli)	GRPEL2	A_23_P404091	0.794413	4.91268e-06				regulator of G-protein signaling 16	RGS16	A_23_P320578	0.726486	0.000983011				X-ray repair complementing defective repair in Chinese hamster cells 4	XRCC4	A_23_P122174	-0.5867	0.000583258				ST6 beta-galactosamide alpha-2,6-sialyltranferase 1	ST6GAL1	A_24_P388528	0.599438	0.00631742				pantothenate kinase 3	PANK3	A_33_P3241646	0.589406	0.000174346
			XLOC_005617	A_21_P0005002	0.698539	0.0163124				sterile alpha motif domain containing 4A	SAMD4A	A_24_P383523	0.794863	1.01392e-05				ribosomal protein L35	RPL35	A_32_P72940	0.727083	0.000118448				capping protein (actin filament) muscle Z-line, alpha 2	CAPZA2	A_33_P3322353	-0.58626	0.0236528				MICAL-like 1	MICALL1	A_23_P68922	0.599816	0.000197467				chromosome 1 open reading frame 124	C1orf124	A_24_P15292	0.589854	0.00418368
		v-maf musculoaponeurotic fibrosarcoma oncogene homolog G (avian)	MAFG	A_33_P3416767	0.698831	2.22432e-05				zinc finger protein 844	ZNF844	A_33_P3247838	0.795072	1.63556e-05				uncharacterized LOC148189	LOC148189	A_33_P3705884	0.727175	6.31793e-06				resistance to inhibitors of cholinesterase 8 homolog A (C. elegans)	RIC8A	A_24_P115971	-0.585889	0.000438932				PQ loop repeat containing 2	PQLC2	A_33_P3388491	0.600154	0.00923929				chromosome 8 open reading frame 31	C8orf31	A_33_P3431595	0.590186	0.00262999
			ZEB1-AS1	A_19_P00811048	0.699631	1.35251e-05				arginine/serine-rich coiled-coil 2	RSRC2	A_23_P53267	0.795946	5.23897e-06				zinc finger protein 26	ZNF26	A_24_P21831	0.727584	1.6682e-05				catenin (cadherin-associated protein), alpha-like 1	CTNNAL1	A_33_P3260605	-0.5855	0.000530041				zinc finger protein 420	ZNF420	A_23_P380951	0.600588	0.00118351				heterogeneous nuclear ribonucleoprotein H2 (H')	HNRNPH2	A_23_P11286	0.590787	0.00022992
		OTU domain containing 1	OTUD1	A_32_P60459	0.699899	9.17258e-06				zinc finger, CCHC domain containing 8	ZCCHC8	A_23_P64669	0.796302	6.81263e-06				proline-rich nuclear receptor coactivator 1	PNRC1	A_33_P3279831	0.728139	0.000831384						A_33_P3323914	0.584991	0.000481897				breakpoint cluster region pseudogene 2	BCRP2	A_24_P23951	0.600651	0.0128865				leptin receptor overlapping transcript	LEPROT	A_21_P0000140	0.591041	0.000219394
		RMI2, RecQ mediated genome instability 2, homolog (S. cerevisiae)	RMI2	A_23_P353717	0.700163	4.19206e-06				epiregulin	EREG	A_23_P41344	0.796781	0.000957366				zinc finger protein 569	ZNF569	A_33_P3403773	0.728175	0.000529154				zinc finger protein 3 homolog (mouse)	ZFP3	A_33_P3309665	0.585515	0.000599356				yippee-like 5 (Drosophila)	YPEL5	A_33_P3281408	0.600741	0.000400391				zinc finger protein 264	ZNF264	A_33_P3221448	0.591189	0.00207289
				A_24_P152325	0.700433	0.0121186				FOS-like antigen 1	FOSL1	A_23_P161624	0.800012	0.00049183					ZNF805	A_19_P00812349	0.728869	1.6102e-05				PQ loop repeat containing 2	PQLC2	A_33_P3388491	0.587275	0.0105				zinc finger protein 264	ZNF264	A_33_P3221448	0.601306	0.00182594				ATP-binding cassette, sub-family A (ABC1), member 3	ABCA3	A_23_P140876	0.591575	0.00108343
				A_33_P3279620	0.70075	0.00708022				topoisomerase (DNA) III alpha	TOP3A	A_23_P15829	0.801488	9.51631e-05				Ras association (RalGDS/AF-6) domain family member 1	RASSF1	A_23_P41066	0.728884	3.14437e-06					XLOC_014177	A_19_P00318227	0.587307	0.00239488						A_24_P272073	0.602266	0.0135036				endosulfine alpha	ENSA	A_32_P107746	0.591578	0.00789452
		zinc finger protein 345	ZNF345	A_33_P3318596	0.70077	0.00013493						A_23_P3552	0.801915	1.30724e-05				TGFB-induced factor homeobox 1	TGIF1	A_23_P153197	0.729822	1.95828e-06				high mobility group AT-hook 2	HMGA2	A_33_P3357658	0.588688	0.00204415				family with sequence similarity 43, member A	FAM43A	A_33_P3410589	0.603443	4.39247e-05				homer homolog 1 (Drosophila)	HOMER1	A_33_P3372257	0.591868	0.00229905
		MORC family CW-type zinc finger 3	MORC3	A_23_P325501	0.701479	3.02047e-05				zinc finger protein 394	ZNF394	A_23_P157416	0.802068	6.05878e-06				replication protein A2, 32kDa	RPA2	A_33_P3334635	0.730286	3.89571e-06					XLOC_008099	A_21_P0006439	0.5887	0.0107118					Q8WNA4	A_19_P00801506	0.603769	0.000625328				quiescin Q6 sulfhydryl oxidase 1	QSOX1	A_23_P12463	0.59248	0.00073749
		uncharacterized LOC153546	LOC153546	A_33_P3839334	0.702341	0.000208523				zinc finger protein 697	ZNF697	A_32_P19716	0.80238	3.50077e-07				elongation factor RNA polymerase II	ELL	A_23_P16538	0.731258	8.22961e-06				chromosome 17 open reading frame 51	C17orf51	A_24_P59607	0.588821	2.70637e-05				uncharacterized LOC100506694	LOC100506694	A_19_P00317432	0.604482	0.000739113				Sec23 homolog B (S. cerevisiae)	SEC23B	A_24_P690924	0.592551	0.00620949
		zinc finger and BTB domain containing 43	ZBTB43	A_33_P3349414	0.70314	0.000116088				Kruppel-like factor 5 (intestinal)	KLF5	A_23_P53891	0.802489	0.000782617					XLOC_014105	A_19_P00321272	0.732881	0.000437767				zinc finger protein 580	ZNF580	A_23_P164797	0.589176	0.00125323				solute carrier family 20 (phosphate transporter), member 1	SLC20A1	A_23_P165657	0.60562	0.000470778						A_19_P00319591	0.592703	0.000115841
		dual specificity phosphatase 1	DUSP1	A_23_P110712	0.703458	5.80092e-05				zinc finger protein 283	ZNF283	A_23_P94911	0.805921	1.61297e-05				zinc finger protein 805	ZNF805	A_33_P3247599	0.734427	5.02003e-05						A_32_P3572	0.589612	0.000416267				v-rel reticuloendotheliosis viral oncogene homolog B	RELB	A_23_P55706	0.60627	0.00265577				uncharacterized FLJ39534	FLJ39534	A_19_P00318361	0.592982	0.00358189
		FYVE, RhoGEF and PH domain containing 4	FGD4	A_33_P3404588	0.707284	0.0014258				histone cluster 1, H2ae	HIST1H2AE	A_23_P59045	0.808162	0.0177733				long intergenic non-protein coding RNA 338	LINC00338	A_19_P00810899	0.735671	0.000371374				zinc finger, DHHC-type containing 18	ZDHHC18	A_23_P51853	0.590525	0.00141264				zinc finger protein 777	ZNF777	A_23_P309803	0.609052	0.000397117				chromosome 6 open reading frame 72	C6orf72	A_23_P31109	0.594327	0.000128961
		protein phosphatase, Mg2+/Mn2+ dependent, 1D	PPM1D	A_33_P3302696	0.707704	0.00186244				family with sequence similarity 53, member C	FAM53C	A_23_P167789	0.808228	1.9492e-06						A_33_P3239184	0.737499	6.87488e-05				insulin-like growth factor binding protein 1	IGFBP1	A_23_P42868	0.591346	2.0409e-05				family with sequence similarity 157, member A	FAM157A	A_33_P3222501	0.609119	0.000134132					XLOC_014105	A_19_P00321272	0.594513	0.00233302
		RNA, U6atac small nuclear (U12-dependent splicing)	RNU6ATAC	A_21_P0000504	0.707727	0.00138149				cell death-inducing DFFA-like effector c	CIDEC	A_33_P3240767	0.808534	1.16052e-05				zinc finger protein 766	ZNF766	A_33_P3349716	0.738104	1.5911e-05					KIAA0040	A_19_P00315506	0.591667	0.00592734				WD repeat domain 45	WDR45	A_23_P251717	0.611247	4.95352e-05						A_24_P927474	0.595188	0.000999269
		ring finger protein 138 pseudogene 1	RNF138P1	A_33_P3413541	0.708918	0.000110599				forkhead box O3	FOXO3	A_33_P3240392	0.809125	7.41604e-07				zinc finger protein 655	ZNF655	A_23_P345081	0.739213	4.01169e-06				spermidine/spermine N1-acetyltransferase 1	SAT1	A_33_P3371718	0.591816	0.00265689				ferritin, heavy polypeptide 1	FTH1	A_33_P3253249	0.61348	3.28172e-05				zinc finger protein 295	ZNF295	A_33_P3281066	0.595393	0.000136946
		zinc finger protein 643	ZNF643	A_23_P160200	0.711177	1.54247e-06				zinc finger protein 567	ZNF567	A_23_P354894	0.810219	0.000110225				AT rich interactive domain 5B (MRF1-like)	ARID5B	A_32_P18440	0.740027	0.000189786				chloride channel 7	CLCN7	A_23_P129334	0.592025	0.000338645				actin, beta	ACTB	A_23_P135769	0.614856	0.000303356				ankyrin repeat and LEM domain containing 2	ANKLE2	A_23_P10858	0.596079	0.00032174
		MAGE-like 2	MAGEL2	A_23_P99996	0.712124	0.00045875				H1 histone family, member 0	H1F0	A_23_P29257	0.810313	3.23888e-05				zinc finger protein 383	ZNF383	A_23_P319013	0.740084	1.6605e-05				microtubule associated monoxygenase, calponin and LIM domain containing 1	MICAL1	A_24_P283341	0.592096	0.000184939					XLOC_l2_015213	A_21_P0013655	0.6173	0.0176065						A_19_P00805291	0.596285	2.52126e-05
		coagulation factor III (thromboplastin, tissue factor)	F3	A_33_P3226832	0.712382	0.000448001				zinc finger protein 615	ZNF615	A_33_P3400424	0.811863	9.74229e-05				YY1 associated factor 2	YAF2	A_33_P3390456	0.740112	7.77205e-05						A_33_P3413997	0.592295	0.0011678				KIAA2026	KIAA2026	A_23_P157758	0.621033	0.000318627				nucleoporin 43kDa	NUP43	A_33_P3273063	0.597345	0.000366648
		GABA(A) receptor-associated protein like 1	GABARAPL1	A_24_P4816	0.712809	0.000280329				small nucleolar RNA host gene 5 (non-protein coding)	SNHG5	A_19_P00322702	0.813256	7.52107e-06						A_33_P3342430	0.740409	1.38789e-05				chromosome 17 open reading frame 51	C17orf51	A_19_P00804596	0.594384	2.09802e-05				mediator complex subunit 10	MED10	A_23_P124024	0.621803	0.000754977				peroxiredoxin 3	PRDX3	A_23_P63751	0.597702	0.01741
		rhomboid, veinlet-like 1 (Drosophila)	RHBDL1	A_23_P26468	0.713884	0.00235209				uncharacterized LOC388796	LOC388796	A_19_P00322220	0.81353	7.60733e-07				cytochrome b-561 domain containing 1	CYB561D1	A_33_P3377110	0.741912	0.000248631				v-maf musculoaponeurotic fibrosarcoma oncogene homolog F (avian)	MAFF	A_23_P103110	0.595226	0.00565502				high mobility group AT-hook 2	HMGA2	A_33_P3357658	0.622347	0.00133853						A_24_P84048	0.5979	0.00109836
		GLIS family zinc finger 2	GLIS2	A_33_P3333224	0.714384	0.00270738				zinc finger and BTB domain containing 48	ZBTB48	A_33_P3253264	0.815782	0.000166958				zinc finger protein 777	ZNF777	A_33_P3215134	0.74204	1.0076e-05				milk fat globule-EGF factor 8 protein	MFGE8	A_24_P133584	0.59616	0.00033483				dual specificity phosphatase 6	DUSP6	A_23_P139704	0.623138	0.00213538						A_33_P3232688	0.5979	0.000153861
		family with sequence similarity 27, member A	FAM27A	A_24_P342096	0.716007	2.0634e-05				CWC25 spliceosome-associated protein homolog (S. cerevisiae)	CWC25	A_24_P48318	0.816972	0.000178509				C-type lectin domain family 2, member D	CLEC2D	A_32_P80068	0.742244	0.000115216				RFNG O-fucosylpeptide 3-beta-N-acetylglucosaminyltransferase	RFNG	A_23_P84629	0.599207	0.00278963				chromosome 9 open reading frame 91	C9orf91	A_24_P915196	0.624301	5.20457e-05				spermidine/spermine N1-acetyltransferase 1	SAT1	A_23_P137016	0.597964	0.000327713
		yippee-like 5 (Drosophila)	YPEL5	A_23_P108835	0.716343	0.000277958				zinc finger protein 777	ZNF777	A_33_P3215134	0.82234	3.24377e-06					XLOC_l2_008163	A_21_P0011941	0.742444	0.000810164				family with sequence similarity 179, member B	FAM179B	A_33_P3226202	0.59961	0.00029142				GTP binding protein 2	GTPBP2	A_23_P379026	0.624802	1.51368e-05				LYR motif containing 2	LYRM2	A_23_P42042	0.598475	5.38685e-05
		long intergenic non-protein coding RNA 338	LINC00338	A_19_P00810899	0.717016	0.000464424				GTP binding protein 2	GTPBP2	A_23_P379026	0.825473	6.6322e-07					SNHG11	A_19_P00318014	0.74332	3.44691e-06				ets variant 4	ETV4	A_24_P416346	0.600199	0.0014918				headcase homolog (Drosophila)	HECA	A_23_P59349	0.626388	8.13177e-06					XLOC_l2_005352	A_21_P0011450	0.598966	0.00016521
		aryl hydrocarbon receptor nuclear translocator-like	ARNTL	A_23_P162037	0.717575	8.64401e-06				ADP-ribosylation factor-like 5B	ARL5B	A_24_P943997	0.82621	2.44477e-05				serine peptidase inhibitor, Kazal type 4	SPINK4	A_23_P71880	0.743631	0.000165175				zinc finger protein 777	ZNF777	A_23_P309803	0.600495	0.000449095				ribosomal protein S6 kinase, 90kDa, polypeptide 5	RPS6KA5	A_23_P37375	0.627556	3.95206e-05				glycyl-tRNA synthetase	GARS	A_24_P154948	0.59899	0.000128874
		v-rel reticuloendotheliosis viral oncogene homolog (avian)	REL	A_23_P56938	0.718451	3.06923e-05				B-cell CLL/lymphoma 6	BCL6	A_23_P57856	0.827013	1.39529e-05				forkhead box O3	FOXO3	A_33_P3240392	0.744232	1.95423e-06				chromosome 19 open reading frame 68	C19orf68	A_23_P4922	0.602237	3.84783e-05				polymerase (RNA) III (DNA directed) polypeptide G (32kD)	POLR3G	A_23_P41942	0.627728	5.83413e-05						A_24_P83544	0.599259	2.97684e-05
		pogo transposable element with ZNF domain	POGZ	A_23_P63219	0.718787	4.3189e-05				ZNFX1 antisense RNA 1 (non-protein coding)	ZNFX1-AS1	A_24_P161463	0.827532	2.92352e-06				TatD DNase domain containing 1	TATDN1	A_23_P254978	0.7449	0.000142921				RAB20, member RAS oncogene family	RAB20	A_24_P22050	0.602512	0.000132603				transforming growth factor beta regulator 1	TBRG1	A_24_P21752	0.633546	0.00272424				chromosome 18 open reading frame 8	C18orf8	A_23_P78383	0.599698	9.99945e-05
		CWC25 spliceosome-associated protein homolog (S. cerevisiae)	CWC25	A_24_P48318	0.718896	0.000556376				nucleoporin like 1	NUPL1	A_33_P3320538	0.828962	1.05886e-06				zinc finger protein 441	ZNF441	A_33_P3397323	0.7457	0.00028951				zinc finger protein 36, C3H type-like 1	ZFP36L1	A_23_P99540	0.602522	9.56744e-05				cell death-inducing DFFA-like effector c	CIDEC	A_33_P3240767	0.633762	0.000136347				spermine synthase	SMS	A_21_P0013088	0.600669	0.000146407
		KIAA1370	KIAA1370	A_23_P99853	0.719013	7.53073e-05				zinc finger protein 777	ZNF777	A_23_P309803	0.833593	1.91685e-05				zinc finger protein 283	ZNF283	A_23_P94911	0.747125	3.5467e-05				leucine rich repeat and Ig domain containing 2	LINGO2	A_23_P157926	0.602764	0.00859021				family with sequence similarity 83, member A	FAM83A	A_23_P216052	0.633788	0.00131511				actin related protein 2/3 complex, subunit 5, 16kDa	ARPC5	A_33_P3420235	0.600826	0.000279422
		FYVE, RhoGEF and PH domain containing 3	FGD3	A_24_P153840	0.719304	3.22595e-05				Ras association (RalGDS/AF-6) domain family member 1	RASSF1	A_23_P41066	0.837091	6.37113e-07				minichromosome maintenance complex component 5	MCM5	A_23_P132277	0.747293	0.000178718				dual specificity phosphatase 6	DUSP6	A_23_P139704	0.604391	0.00266829				dual specificity phosphatase 5	DUSP5	A_23_P150018	0.637387	1.80463e-05				FAST kinase domains 2	FASTKD2	A_23_P345830	0.600846	0.00122964
		death inducer-obliterator 1	DIDO1	A_23_P395426	0.719931	0.000172437				zinc finger protein 184	ZNF184	A_23_P156620	0.838098	3.08022e-05					Q982T4	A_19_P00801585	0.748234	5.49471e-05				zinc finger CCCH-type containing 7B	ZC3H7B	A_23_P218807	0.605002	0.000991829				sprouty homolog 4 (Drosophila)	SPRY4	A_24_P269062	0.639327	2.67753e-05				zinc finger and BTB domain containing 48	ZBTB48	A_33_P3253264	0.603974	0.00207728
		AT rich interactive domain 5B (MRF1-like)	ARID5B	A_32_P18440	0.722039	0.000237798				denticleless homolog (Drosophila)	DTL	A_23_P10385	0.83821	4.35173e-07				zinc finger and BTB domain containing 5	ZBTB5	A_23_P216476	0.748644	9.92127e-06					Q982T4	A_19_P00800555	0.606058	0.00368633				mixed lineage kinase 4	KIAA1804	A_33_P3267482	0.641363	0.0211797				NOP2/Sun domain family, member 3	NSUN3	A_23_P21785	0.604545	2.35228e-05
				A_32_P40375	0.722122	4.17692e-06				family with sequence similarity 27, member A	FAM27A	A_33_P3301219	0.839837	2.11557e-06				dual specificity phosphatase 4	DUSP4	A_23_P134935	0.749478	1.41317e-05				serine peptidase inhibitor, Kazal type 5	SPINK5	A_23_P356494	0.606138	3.20992e-05				zinc finger CCCH-type containing 7B	ZC3H7B	A_23_P218807	0.642253	0.000606354				family with sequence similarity 107, member B	FAM107B	A_33_P3367361	0.605016	0.00141736
		ribosomal protein L23a pseudogene 7	RPL23AP7	A_33_P3386467	0.725553	0.000594558				TGFB-induced factor homeobox 1	TGIF1	A_21_P0000192	0.840812	2.38225e-07				debranching enzyme homolog 1 (S. cerevisiae)	DBR1	A_23_P69452	0.750904	0.00022716				AIG2-like domain 1	A2LD1	A_19_P00809029	0.606186	0.000466678				Rho family GTPase 3	RND3	A_23_P142849	0.642279	0.000739715				EDAR-associated death domain	EDARADD	A_23_P503233	0.605026	0.00190237
		suppressor of cytokine signaling 6	SOCS6	A_23_P207981	0.72662	0.000157077				family with sequence similarity 157, member A	FAM157A	A_33_P3222501	0.843931	4.62072e-06				four and a half LIM domains 2	FHL2	A_23_P108751	0.753213	4.33008e-06				sprouty homolog 2 (Drosophila)	SPRY2	A_23_P128698	0.606628	0.000135544				chloride intracellular channel 4	CLIC4	A_23_P135499	0.642663	0.0028036				osteopetrosis associated transmembrane protein 1	OSTM1	A_32_P154830	0.605485	0.0070139
		zinc finger protein 57	ZNF57	A_23_P39263	0.727742	7.42112e-05						A_33_P3342430	0.844851	3.26703e-06				chromosome 22 open reading frame 43	C22orf43	A_24_P91701	0.753282	0.000238967				long intergenic non-protein coding RNA 467	LINC00467	A_19_P00318495	0.606816	0.000253604				zinc finger and SCAN domain containing 21	ZSCAN21	A_23_P111865	0.643538	1.1625e-05				chromosome 17 open reading frame 48	C17orf48	A_23_P55127	0.606339	0.000147771
		forkhead box D1	FOXD1	A_32_P34920	0.728089	0.000605186				B-cell translocation gene 1, anti-proliferative	BTG1	A_23_P87560	0.848132	0.000180016				cell death-inducing DFFA-like effector c pseudogene	CIDECP	A_24_P484797	0.756762	2.97816e-05				uncharacterized LOC441172	FLJ46906	A_19_P00320664	0.608765	0.00146485				glutamic pyruvate transaminase (alanine aminotransferase) 2	GPT2	A_23_P37892	0.643671	0.000373921				zinc finger protein 350	ZNF350	A_23_P78458	0.60666	0.000103251
		nuclear receptor subfamily 3, group C, member 1 (glucocorticoid receptor)	NR3C1	A_33_P3216297	0.729836	0.000158868				zinc finger protein 562	ZNF562	A_33_P3398091	0.854125	3.63286e-07				centriolin	CNTRL	A_24_P109554	0.756771	0.000452627				testis derived transcript (3 LIM domains)	TES	A_23_P111672	0.609954	0.00173466				zinc finger protein 182	ZNF182	A_32_P43465	0.644412	0.000206806				NADH dehydrogenase (ubiquinone) 1 alpha subcomplex, 12	NDUFA12	A_23_P76557	0.606945	0.00775959
		asparagine synthetase pseudogene	FLJ43315	A_21_P0010773	0.73299	2.11253e-05				sprouty homolog 4 (Drosophila)	SPRY4	A_24_P269062	0.856362	1.06714e-06				OTU domain containing 1	OTUD1	A_32_P60459	0.757098	3.8605e-06				pleckstrin homology domain containing, family M (with RUN domain) member 1	PLEKHM1	A_23_P152727	0.610336	0.000595095				major facilitator superfamily domain containing 2A	MFSD2A	A_33_P3272231	0.64513	0.000211003				VGF nerve growth factor inducible	VGF	A_33_P3276703	0.607103	0.000202507
		yippee-like 5 (Drosophila)	YPEL5	A_33_P3281408	0.734484	6.13034e-05				glutamic pyruvate transaminase (alanine aminotransferase) 2	GPT2	A_23_P37892	0.857897	2.35487e-05				zinc finger protein 567	ZNF567	A_33_P3343750	0.759062	6.54918e-05				dual specificity phosphatase 5	DUSP5	A_23_P150018	0.612119	2.75264e-05				chemokine (C-X-C motif) ligand 2	CXCL2	A_23_P315364	0.650258	9.53649e-06				small nucleolar RNA host gene 7 (non-protein coding)	SNHG7	A_33_P3280927	0.607835	0.000716446
		Mdm4 p53 binding protein homolog (mouse)	MDM4	A_23_P103503	0.735535	0.000110967				small nucleolar RNA host gene 5 (non-protein coding)	SNHG5	A_19_P00319095	0.861095	3.13803e-06				WAS protein homolog associated with actin, golgi membranes and microtubules	WHAMM	A_24_P307827	0.760118	5.45945e-06				uncharacterized LOC143153	FLJ31958	A_33_P3378654	0.613199	0.00153741				cat eye syndrome chromosome region, candidate 7 (non-protein coding)	CECR7	A_33_P3262625	0.650484	4.89321e-05				oligonucleotide/oligosaccharide-binding fold containing 2A	OBFC2A	A_23_P329198	0.607836	1.4469e-05
		zinc finger protein 420	ZNF420	A_33_P3395396	0.736015	9.32136e-05				oligonucleotide/oligosaccharide-binding fold containing 2A	OBFC2A	A_24_P229531	0.861419	0.000819701				gon-4-like (C. elegans)	GON4L	A_33_P3221119	0.760489	9.77237e-05				zinc finger and BTB domain containing 48	ZBTB48	A_33_P3253264	0.613994	0.00183697				transient receptor potential cation channel, subfamily C, member 6	TRPC6	A_33_P3337627	0.65058	0.0280784				spindlin family, member 4	SPIN4	A_32_P222961	0.608112	3.33809e-05
		chromosome 14 open reading frame 118	C14orf118	A_33_P3292812	0.736175	2.03265e-05				v-abl Abelson murine leukemia viral oncogene homolog 2	ABL2	A_32_P139894	0.873471	3.46713e-07				ras homolog gene family, member Q	RHOQ	A_33_P3271323	0.760742	2.07562e-06				oligonucleotide/oligosaccharide-binding fold containing 2A	OBFC2A	A_23_P329198	0.616034	1.25412e-05				Sad1 and UNC84 domain containing 2	SUN2	A_32_P194115	0.654113	0.000252686				cytochrome P450, family 1, subfamily B, polypeptide 1	CYP1B1	A_33_P3290343	0.608297	0.000949005
		cardiotrophin-like cytokine factor 1	CLCF1	A_23_P138760	0.736211	2.99291e-05				kynureninase	KYNU	A_33_P3312658	0.873948	1.14379e-05				ubiquinol-cytochrome c reductase, complex III subunit VII, 9.5kDa	UQCRQ	A_23_P213718	0.76109	0.000311347				alanyl-tRNA synthetase	AARS	A_24_P172990	0.616139	0.00305962				A20-binding inhibitor of NF-kappaB activation 2 pseudogene	LOC100132831	A_32_P41496	0.654215	0.00446445				tau tubulin kinase 2	TTBK2	A_33_P3215277	0.608351	7.18459e-05
		tumor necrosis factor receptor superfamily, member 10b	TNFRSF10B	A_24_P218265	0.736762	7.65675e-06				GABA(A) receptor-associated protein like 1	GABARAPL1	A_24_P4816	0.873952	3.97996e-05				zinc finger protein 587	ZNF587	A_23_P388146	0.761183	0.000355458				transforming growth factor beta regulator 1	TBRG1	A_24_P21752	0.61812	0.00324472				tyrosyl-tRNA synthetase	YARS	A_23_P379550	0.654457	0.0077538				uncharacterized LOC100506844	LOC100506844	A_21_P0000744	0.608626	8.00169e-05
		par-6 partitioning defective 6 homolog beta (C. elegans)	PARD6B	A_32_P205637	0.737437	7.16717e-05				zinc finger protein 484	ZNF484	A_23_P341700	0.874497	7.96072e-07				aryl hydrocarbon receptor nuclear translocator-like	ARNTL	A_23_P162037	0.761796	4.47746e-06				uncharacterized LOC100287789	LOC100287789	A_21_P0013928	0.618438	0.00107468					XLOC_l2_013931	A_21_P0013338	0.655454	0.000300368						A_33_P3319502	0.60882	4.35464e-05
		aryl hydrocarbon receptor	AHR	A_23_P215566	0.740502	1.95983e-05				tRNA methyltransferase 61 homolog A (S. cerevisiae)	TRMT61A	A_23_P151497	0.874793	1.20332e-05					Q982T4	A_19_P00800555	0.763917	0.000627359				early growth response 1	EGR1	A_23_P214080	0.619333	0.00918667				CCAAT/enhancer binding protein (C/EBP), beta	CEBPB	A_23_P411296	0.656628	4.67604e-05				oxysterol binding protein-like 6	OSBPL6	A_23_P108823	0.609182	1.81899e-05
		uncharacterized LOC643977	FLJ32255	A_24_P829183	0.740801	0.000125162				zinc finger protein 317	ZNF317	A_24_P258955	0.881001	1.55745e-06				B-cell CLL/lymphoma 6	BCL6	A_23_P57856	0.767049	3.06875e-05				zinc finger protein 501	ZNF501	A_33_P3257856	0.619544	0.000161479				dual specificity phosphatase 5 pseudogene	DUSP5P	A_24_P367602	0.65877	4.56469e-05				transmembrane protein 167B	TMEM167B	A_33_P3218356	0.610675	9.71504e-05
		rotatin	RTTN	A_24_P108301	0.741872	1.30605e-06				uncharacterized LOC388796	LOC388796	A_24_P860703	0.882971	1.43225e-07				tribbles homolog 1 (Drosophila)	TRIB1	A_24_P252497	0.769211	6.35788e-06				adaptor-related protein complex 3, beta 2 subunit	AP3B2	A_23_P77304	0.620178	3.74653e-05				seryl-tRNA synthetase	SARS	A_33_P3248654	0.661863	3.25595e-05				uncharacterized LOC100506054	LOC100506054	A_21_P0000799	0.610838	0.00157294
		zinc finger protein 787	ZNF787	A_23_P78835	0.743833	0.000127167					XLOC_000555	A_21_P0001418	0.88321	6.79622e-07				Kruppel-like factor 11	KLF11	A_23_P44505	0.773332	7.59477e-07				zinc finger protein 358	ZNF358	A_24_P19175	0.620303	0.000719137				phosphodiesterase 4D, cAMP-specific	PDE4D	A_33_P3389653	0.66211	0.00132798				ubiquitin-conjugating enzyme E2 variant 1	UBE2V1	A_23_P501996	0.61259	5.04359e-05
		HSPB (heat shock 27kDa) associated protein 1	HSPBAP1	A_23_P250118	0.743963	0.000283309				zinc finger protein 57	ZNF57	A_23_P39263	0.88624	9.69759e-06				zinc finger protein 317	ZNF317	A_24_P258955	0.775075	6.58131e-06				unc-51-like kinase 1 (C. elegans)	ULK1	A_24_P73370	0.620338	0.00034076				forkhead box L1	FOXL1	A_33_P3355503	0.662162	0.0048061				transforming growth factor, beta receptor II (70/80kDa)	TGFBR2	A_23_P211957	0.613495	0.00156465
		zinc finger protein 432	ZNF432	A_23_P208210	0.744142	3.82888e-06				serine peptidase inhibitor, Kazal type 5	SPINK5	A_23_P356494	0.888502	4.54676e-07				zinc finger protein 394	ZNF394	A_33_P3290085	0.777486	9.54679e-07				filamin binding LIM protein 1	FBLIM1	A_23_P23457	0.621308	0.00322212				polyhomeotic homolog 2 (Drosophila)	PHC2	A_23_P423864	0.662189	0.000989408				small nuclear ribonucleoprotein polypeptide C	SNRPC	A_24_P83922	0.613573	2.53006e-05
		zinc finger protein 766	ZNF766	A_33_P3349716	0.74511	1.4392e-05				dual specificity phosphatase 5	DUSP5	A_23_P150018	0.888995	4.25074e-07				kynureninase	KYNU	A_33_P3312658	0.777904	3.86524e-05				quiescin Q6 sulfhydryl oxidase 1	QSOX1	A_33_P3225268	0.621435	0.00188075				insulin receptor substrate 2	IRS2	A_24_P154037	0.663157	9.22452e-05					XLOC_l2_013728	A_21_P0013280	0.613885	0.00422619
		transcription factor binding to IGHM enhancer 3	TFE3	A_23_P84952	0.745532	5.01163e-05				family with sequence similarity 118, member A	FAM118A	A_33_P3252809	0.890591	2.2205e-05				chromosome 3 open reading frame 19	C3orf19	A_33_P3294881	0.779088	4.32011e-05				pleckstrin homology-like domain, family A, member 1	PHLDA1	A_24_P915692	0.623364	0.00132762						A_32_P40375	0.664314	1.04359e-05				sparc/osteonectin, cwcv and kazal-like domains proteoglycan (testican) 2	SPOCK2	A_33_P3214948	0.614194	0.00106964
		jumonji domain containing 1C	JMJD1C	A_23_P427217	0.745559	0.000607969				CCAAT/enhancer binding protein (C/EBP), beta	CEBPB	A_23_P411296	0.891448	1.71721e-06				chromosome 6 open reading frame 48	C6orf48	A_33_P3353051	0.779407	8.95592e-05				dual specificity phosphatase 5 pseudogene	DUSP5P	A_24_P367602	0.624185	7.79741e-05				uncharacterized LOC348761	LOC348761	A_33_P3726064	0.664989	7.87664e-06						A_33_P3342430	0.614638	9.24151e-05
		EPB41L4A antisense RNA 1 (non-protein coding)	EPB41L4A-AS1	A_23_P58538	0.746707	8.75981e-06					XLOC_013282	A_19_P00804777	0.891676	1.58854e-05				nuclear paraspeckle assembly transcript 1 (non-protein coding)	NEAT1	A_21_P0011024	0.780759	0.000350014				uncharacterized LOC284454	LOC284454	A_33_P3461633	0.624907	0.00262263				cyclin L2	CCNL2	A_24_P376339	0.668066	0.000349299				serine incorporator 3	SERINC3	A_23_P435501	0.615055	0.00317624
		INO80 complex subunit D	INO80D	A_33_P3330716	0.747423	2.33236e-05				zinc finger protein 394	ZNF394	A_33_P3290085	0.891735	1.86806e-07				transmembrane protein 85	TMEM85	A_23_P106481	0.781558	0.000430216				breakpoint cluster region pseudogene 2	BCRP2	A_24_P23951	0.626621	0.0101089					SNHG11	A_19_P00320792	0.669471	0.00114426						A_33_P3334342	0.615116	0.00386401
		zinc finger, CCHC domain containing 8	ZCCHC8	A_23_P64669	0.747938	1.34207e-05				pim-1 oncogene	PIM1	A_23_P345118	0.893185	0.000127891				EPB41L4A antisense RNA 1 (non-protein coding)	EPB41L4A-AS1	A_23_P58538	0.782284	5.25822e-06				ring finger protein 112	RNF112	A_23_P107116	0.62665	0.000622648				SH3 and PX domains 2A	SH3PXD2A	A_23_P35456	0.669922	1.76493e-05				chloride channel CLIC-like 1	CLCC1	A_33_P3412149	0.615449	0.000660095
		inositol hexakisphosphate kinase 2	IP6K2	A_23_P301138	0.74828	1.59916e-05				cyclin T1	CCNT1	A_23_P98963	0.895578	2.27119e-07				family with sequence similarity 207, member A	FAM207A	A_23_P61202	0.783812	1.47749e-06				zinc finger protein 264	ZNF264	A_33_P3221448	0.627813	0.00131138				transducer of ERBB2, 2 pseudogene 1	TOB2P1	A_33_P3348011	0.671286	0.000473027				stromal antigen 3-like 4	STAG3L4	A_33_P3373298	0.616252	0.000386392
		growth arrest and DNA-damage-inducible, beta	GADD45B	A_24_P239606	0.750992	0.00017318				uncharacterized LOC550112	LOC550112	A_33_P3254756	0.897354	1.81438e-06				uncharacterized LOC388796	LOC388796	A_24_P860703	0.783865	5.97602e-07				transmembrane protein 198	TMEM198	A_24_P822704	0.628138	0.000404052				uncharacterized LOC100129110	LOC100129110	A_33_P3301221	0.67693	0.000541789				solute carrier family 39 (metal ion transporter), member 11	SLC39A11	A_24_P57528	0.617062	2.74848e-05
		zinc finger protein 566	ZNF566	A_23_P306956	0.751486	4.68388e-06				small nucleolar RNA host gene 5 (non-protein coding)	SNHG5	A_19_P00316701	0.899184	5.41996e-07				cyclin E2	CCNE2	A_33_P3217819	0.78404	0.000188971				zinc finger protein 577	ZNF577	A_23_P208198	0.630022	0.00197798				TSC22 domain family, member 3	TSC22D3	A_33_P3237634	0.678672	1.73722e-05				G protein-coupled receptor 158	GPR158	A_24_P349117	0.617427	0.000114183
		family with sequence similarity 122C	FAM122C	A_21_P0000080	0.752005	0.00140368				zinc finger protein 165	ZNF165	A_23_P93269	0.901542	1.95254e-06				sel-1 suppressor of lin-12-like (C. elegans)	SEL1L	A_33_P3275968	0.78516	1.27678e-05				notchless homolog 1 (Drosophila)	NLE1	A_33_P3361513	0.630983	0.00377913						A_33_P3416414	0.67938	0.00261716				anthrax toxin receptor 1	ANTXR1	A_24_P131522	0.617526	0.000716256
		zinc finger and BTB domain containing 17	ZBTB17	A_23_P654	0.754082	4.94393e-06				small nucleolar RNA host gene 5 (non-protein coding)	SNHG5	A_19_P00317984	0.901778	2.88899e-06				WD repeat domain 83	WDR83	A_23_P39024	0.785675	0.000247388				chromosome 6 open reading frame 145	C6orf145	A_24_P272290	0.634072	0.000363148				junctophilin 3	JPH3	A_33_P3423721	0.680115	0.000232871				myotubularin related protein 1	MTMR1	A_33_P3327097	0.617653	0.000108671
		headcase homolog (Drosophila)	HECA	A_23_P59349	0.754088	1.00192e-06				activating transcription factor 4 (tax-responsive enhancer element B67)	ATF4	A_23_P120933	0.904292	2.21085e-06				uncharacterized LOC153546	LOC153546	A_33_P3839334	0.785865	7.16477e-05				uncharacterized LOC388796	LOC388796	A_19_P00322967	0.63462	3.34436e-05				epithelial mitogen homolog (mouse)	EPGN	A_24_P205994	0.68041	0.000377871				WD repeat domain 7	WDR7	A_23_P164528	0.617964	4.15857e-05
		zinc finger protein 670	ZNF670	A_23_P74981	0.755921	0.000164499				zinc finger protein 295	ZNF295	A_24_P339869	0.905582	5.31198e-06				family with sequence similarity 24, member B	FAM24B	A_21_P0000707	0.786282	7.61246e-07				zinc finger and SCAN domain containing 21	ZSCAN21	A_23_P111865	0.636095	1.31674e-05				colorectal neoplasia differentially expressed (non-protein coding)	CRNDE	A_21_P0008884	0.683753	0.000408204				hydroxysteroid (17-beta) dehydrogenase 7	HSD17B7	A_33_P3276369	0.618234	0.000468337
		zinc finger protein 7	ZNF7	A_23_P255805	0.756247	1.53826e-06						A_24_P307065	0.908333	6.6596e-06				small nucleolar RNA host gene 5 (non-protein coding)	SNHG5	A_19_P00322754	0.786662	1.49615e-05				nuclear paraspeckle assembly transcript 1 (non-protein coding)	NEAT1	A_19_P00318409	0.637618	0.00369384				cell death-inducing DFFA-like effector c pseudogene	CIDECP	A_24_P484797	0.689202	7.62111e-05						A_24_P135921	0.618725	0.00600891
		YOD1 OTU deubiquinating enzyme 1 homolog (S. cerevisiae)	YOD1	A_32_P178945	0.756271	1.3112e-06				uncharacterized LOC388796	LOC388796	A_19_P00317793	0.909989	1.02362e-07				kynureninase	KYNU	A_24_P11506	0.786788	0.00320902				nucleotide binding protein 2	NUBP2	A_23_P49082	0.637766	0.0147436				family with sequence similarity 24, member B	FAM24B	A_21_P0000707	0.68976	3.42841e-06				YY1 associated factor 2	YAF2	A_33_P3390456	0.618864	0.000407456
		spermatogenesis associated 2-like	SPATA2L	A_33_P3288364	0.756324	1.00531e-05				zinc finger protein 473	ZNF473	A_24_P941376	0.912142	3.13241e-05				cell death-inducing DFFA-like effector c	CIDEC	A_33_P3240767	0.78724	1.54309e-05				TSC22 domain family, member 1	TSC22D1	A_33_P3296205	0.638371	3.14827e-05				chemokine (C-X-C motif) ligand 2	CXCL2	A_24_P257416	0.690503	1.96562e-06				surfeit 2	SURF2	A_23_P146479	0.619508	0.00143633
		Ras association (RalGDS/AF-6) domain family member 1	RASSF1	A_23_P41066	0.756713	2.05593e-06				small nucleolar RNA host gene 5 (non-protein coding)	SNHG5	A_19_P00316659	0.913173	4.85864e-07				aryl hydrocarbon receptor	AHR	A_33_P3316800	0.788013	0.00175963				tripartite motif containing 21	TRIM21	A_23_P47691	0.638373	0.00349189				cyclin B1 interacting protein 1, E3 ubiquitin protein ligase	CCNB1IP1	A_23_P76882	0.692302	9.45059e-06						A_24_P42014	0.619559	1.16643e-05
		transmembrane protein 55B	TMEM55B	A_23_P48610	0.759632	2.15657e-05				zinc finger protein 420	ZNF420	A_33_P3395396	0.91536	9.94981e-06						A_33_P3212839	0.789579	1.29846e-06				long intergenic non-protein coding RNA 338	LINC00338	A_32_P8529	0.641532	0.000339917				cathepsin Z	CTSZ	A_23_P40240	0.693537	0.00109705				ATP-binding cassette, sub-family A (ABC1), member 5	ABCA5	A_23_P78018	0.620095	0.000388033
		zinc finger and BTB domain containing 5	ZBTB5	A_23_P216476	0.759681	8.46576e-06				family with sequence similarity 24, member B	FAM24B	A_23_P52531	0.921402	8.28668e-06				GTP binding protein 2	GTPBP2	A_23_P379026	0.7915	1.08451e-06					XLOC_l2_008163	A_21_P0011941	0.641841	0.00249701				zinc finger protein 839 pseudogene	LOC389906	A_33_P3325229	0.694403	0.00347682				leucyl/cystinyl aminopeptidase	LNPEP	A_23_P156061	0.620672	0.00020604
		zinc finger protein 845	ZNF845	A_32_P207428	0.760675	4.59334e-07				BTB and CNC homology 1, basic leucine zipper transcription factor 1	BACH1	A_23_P211047	0.921583	6.3084e-06				zinc finger protein 844	ZNF844	A_33_P3247838	0.792428	1.69421e-05				chromosome 9 open reading frame 91	C9orf91	A_24_P915196	0.642579	3.89068e-05				uncharacterized LOC388796	LOC388796	A_19_P00322967	0.694491	1.30178e-05				mitochondrial ribosomal protein S36	MRPS36	A_33_P3281196	0.621475	0.00102582
		zinc finger protein 184	ZNF184	A_23_P156620	0.760688	8.13478e-05				bone morphogenetic protein 2	BMP2	A_33_P3237150	0.922606	7.15634e-08				zinc finger protein 57	ZNF57	A_23_P39263	0.792698	3.1451e-05				uncharacterized LOC348761	LOC348761	A_33_P3726064	0.644826	1.09955e-05				spermidine/spermine N1-acetyltransferase 1	SAT1	A_33_P3371718	0.696305	0.000756065				chromosome 15 open reading frame 38	C15orf38	A_24_P404033	0.622315	0.000615249
		topoisomerase I binding, arginine/serine-rich, E3 ubiquitin protein ligase	TOPORS	A_23_P32217	0.760964	0.000286443				cystathionase (cystathionine gamma-lyase)	CTH	A_23_P126103	0.92512	1.91569e-07				v-maf musculoaponeurotic fibrosarcoma oncogene homolog F (avian)	MAFF	A_23_P103110	0.793356	0.000671932						A_33_P3399755	0.646295	0.00024452					XLOC_007398	A_21_P0006017	0.697415	0.000625302				glucuronidase, beta pseudogene 1	GUSBP1	A_33_P3214209	0.6227	3.01197e-05
		uncharacterized LOC729737	LOC729737	A_24_P665504	0.762052	0.000144493				Rho family GTPase 3	RND3	A_23_P142849	0.92894	2.31271e-05				BEN domain containing 3	BEND3	A_23_P359854	0.793735	0.000123818				transmembrane protein 55B	TMEM55B	A_23_P48610	0.647121	0.000107695				tumor necrosis factor receptor superfamily, member 10d, decoy with truncated death domain	TNFRSF10D	A_33_P3326588	0.700915	3.99835e-06				calcium/calmodulin-dependent protein kinase II delta	CAMK2D	A_23_P144458	0.622722	2.8586e-05
		zinc finger protein 615	ZNF615	A_33_P3400424	0.764998	0.000171174				solute carrier family 38, member 2	SLC38A2	A_23_P218079	0.932122	0.000318472				tripartite motif containing 39	TRIM39	A_24_P89413	0.793893	2.81922e-06				harakiri, BCL2 interacting protein (contains only BH3 domain)	HRK	A_23_P25194	0.647383	1.61325e-05				chromosome X open reading frame 61	CXorf61	A_23_P432352	0.701972	0.000226179						A_24_P93452	0.623231	4.52472e-05
		TSC22 domain family, member 2	TSC22D2	A_23_P92230	0.765236	0.00106142				zinc finger protein 529	ZNF529	A_23_P433676	0.932348	1.23145e-05				zinc finger protein 212	ZNF212	A_23_P415558	0.794751	6.99118e-06				jun D proto-oncogene	JUND	A_33_P3324909	0.647538	0.000970842				EPB41L4A antisense RNA 1 (non-protein coding)	EPB41L4A-AS1	A_23_P58538	0.704481	1.63529e-05				zinc finger protein, X-linked	ZFX	A_23_P125639	0.623523	0.000105527
				A_33_P3364498	0.765554	0.0264252					Q982T4	A_19_P00800555	0.939836	9.633e-05				alanyl-tRNA synthetase	AARS	A_24_P172990	0.796653	0.000401292				MICAL-like 1	MICALL1	A_23_P68922	0.647644	9.57184e-05				uncharacterized LOC283454	LOC283454	A_33_P3687198	0.711745	0.000345494					SNHG11	A_19_P00320792	0.624043	0.00196532
		inositol-trisphosphate 3-kinase C	ITPKC	A_24_P202567	0.766089	0.000255038					XLOC_l2_008163	A_21_P0011941	0.942316	9.60072e-05				sperm flagellar 2	SPEF2	A_33_P3407400	0.796932	7.89488e-05				UBX domain protein 11	UBXN11	A_24_P239811	0.648122	0.00145077				glutamic-oxaloacetic transaminase 1, soluble (aspartate aminotransferase 1)	GOT1	A_23_P63825	0.716267	1.80303e-06				dedicator of cytokinesis 5	DOCK5	A_24_P350245	0.624265	1.03954e-05
		SERTA domain containing 3	SERTAD3	A_23_P141960	0.766149	0.000110543				zinc finger protein 295	ZNF295	A_33_P3281066	0.95113	9.34308e-07				chromosome 6 open reading frame 72	C6orf72	A_33_P3332438	0.797762	3.81192e-05				solute carrier family 38, member 2	SLC38A2	A_23_P218079	0.648817	0.00524339				growth factor receptor-bound protein 10	GRB10	A_24_P235266	0.720622	8.11948e-05				complement component 1, s subcomponent	C1S	A_23_P2492	0.624757	0.000108582
		family with sequence similarity 24, member B	FAM24B	A_21_P0000707	0.767572	1.00881e-06				v-abl Abelson murine leukemia viral oncogene homolog 2	ABL2	A_33_P3219601	0.952102	1.95855e-05				zinc finger CCCH-type containing 12C	ZC3H12C	A_23_P388993	0.799685	4.06997e-06					XLOC_014103	A_19_P00801752	0.649471	0.000869661				pleckstrin homology-like domain, family A, member 1	PHLDA1	A_24_P915692	0.721372	0.000396554				leucine rich repeat and Ig domain containing 2	LINGO2	A_23_P157926	0.624931	0.00687733
		tripartite motif containing 39	TRIM39	A_24_P89413	0.768616	4.0554e-06					LOC100507025	A_21_P0014172	0.952143	0.000112035				GATA binding protein 6	GATA6	A_23_P304450	0.802312	2.57174e-06				high mobility group AT-hook 2	HMGA2	A_23_P95930	0.65068	0.000139951				pyrroline-5-carboxylate reductase family, member 2	PYCR2	A_23_P149042	0.722033	0.00105647				interferon, alpha-inducible protein 27-like 2	IFI27L2	A_23_P140146	0.625464	0.000455377
		uncharacterized LOC728323	LOC728323	A_32_P180971	0.769692	3.32556e-05				WEE1 homolog (S. pombe)	WEE1	A_33_P3290567	0.956595	0.00037385				THUMP domain containing 2	THUMPD2	A_23_P131348	0.802621	0.000371035				colony stimulating factor 2 receptor, alpha, low-affinity (granulocyte-macrophage)	CSF2RA	A_23_P501985	0.650769	5.51893e-05				La ribonucleoprotein domain family, member 6	LARP6	A_23_P117782	0.725447	1.17427e-05				trichorhinophalangeal syndrome I	TRPS1	A_33_P3361746	0.625553	0.000596964
		Fanconi anemia, complementation group A	FANCA	A_33_P3286422	0.770321	3.36879e-05				growth differentiation factor 15	GDF15	A_23_P16523	0.958923	2.37862e-06				transforming, acidic coiled-coil containing protein 2	TACC2	A_23_P127186	0.803248	0.000279733					CYP1B1-AS1	A_19_P00807643	0.651171	0.000210212				interleukin 11	IL11	A_33_P3243887	0.726432	1.3288e-05						A_33_P3372667	0.6262	0.000144605
		thrombospondin, type I, domain containing 1	THSD1	A_23_P14184	0.770426	0.000556034				immediate early response 3	IER3	A_23_P42257	0.959426	5.65786e-07				uncharacterized LOC388796	LOC388796	A_19_P00322220	0.80482	8.6298e-07				zinc finger and BTB domain containing 38	ZBTB38	A_33_P3341474	0.652157	0.000245275				VGF nerve growth factor inducible	VGF	A_33_P3276703	0.728169	3.45805e-05				MIT, microtubule interacting and transport, domain containing 1	MITD1	A_23_P311020	0.628551	5.85089e-05
		long intergenic non-protein coding RNA 472	LINC00472	A_19_P00321739	0.770668	0.000662992				WAS protein homolog associated with actin, golgi membranes and microtubules	WHAMM	A_24_P307827	0.960022	3.70793e-07				zinc finger protein, X-linked	ZFX	A_23_P125639	0.805321	7.59007e-06				neuronal guanine nucleotide exchange factor	NGEF	A_23_P102364	0.652866	1.13577e-05				BCL2 binding component 3	BBC3	A_23_P382775	0.728483	0.00136738				polymerase (DNA directed) kappa	POLK	A_23_P386450	0.628979	5.231e-05
		zinc finger protein 416	ZNF416	A_23_P55688	0.771278	2.20163e-06				uncharacterized LOC388796	LOC388796	A_19_P00318304	0.960088	1.43785e-07				NUAK family, SNF1-like kinase, 2	NUAK2	A_33_P3338166	0.80567	5.49636e-06				polyhomeotic homolog 2 (Drosophila)	PHC2	A_23_P423864	0.653863	0.00109486					XLOC_013282	A_19_P00804777	0.728692	0.00012137				EPB41L4A antisense RNA 1 (non-protein coding)	EPB41L4A-AS1	A_23_P58538	0.630115	5.16085e-05
				A_33_P3331652	0.772175	1.51694e-06				MID1 interacting protein 1 (gastrulation specific G12 homolog (zebrafish))	MID1IP1	A_33_P3217465	0.960388	4.50946e-07				small nucleolar RNA host gene 11 (non-protein coding)	SNHG11	A_23_P325119	0.806522	1.85881e-05				glutamic pyruvate transaminase (alanine aminotransferase) 2	GPT2	A_23_P37892	0.654199	0.000324012				neuralized homolog (Drosophila)	NEURL	A_33_P3293524	0.731685	2.59539e-05				non-metastatic cells 2, protein (NM23B) expressed in	NME2	A_23_P141405	0.630784	2.72951e-05
		zinc finger protein 295	ZNF295	A_33_P3281066	0.773193	9.63155e-06				regulator of G-protein signaling 16	RGS16	A_23_P320578	0.960526	8.13427e-05				stromal antigen 3-like 2	STAG3L2	A_24_P374962	0.806593	6.30187e-05				protein kinase (cAMP-dependent, catalytic) inhibitor gamma	PKIG	A_33_P3310293	0.656561	0.000757127				ectonucleoside triphosphate diphosphohydrolase 7	ENTPD7	A_24_P112447	0.733976	4.15516e-05				hemoglobin, alpha 2	HBA2	A_24_P142305	0.631677	0.00225007
			LOC100507025	A_21_P0014172	0.773681	0.00071715				GATA binding protein 6	GATA6	A_23_P304450	0.963464	3.03316e-07				zinc finger protein 615	ZNF615	A_33_P3327961	0.806987	7.93386e-06				cell death-inducing DFFA-like effector c	CIDEC	A_23_P92025	0.656913	0.000162913				apoptosis enhancing nuclease	AEN	A_33_P3214501	0.734308	0.000105509				cell death-inducing DFFA-like effector c	CIDEC	A_33_P3240767	0.631866	0.000140259
		zinc finger protein 284	ZNF284	A_33_P3221432	0.774357	0.000314327				Cbp/p300-interacting transactivator, with Glu/Asp-rich carboxy-terminal domain, 2	CITED2	A_23_P214969	0.966034	4.58134e-05				mitochondrial ribosomal protein S34	MRPS34	A_33_P3422931	0.807417	0.000111128				asparagine synthetase pseudogene	FLJ43315	A_21_P0010773	0.657685	6.37166e-05				chromosome 3 open reading frame 19	C3orf19	A_33_P3362521	0.735428	8.22165e-06				CDGSH iron sulfur domain 1	CISD1	A_23_P35467	0.632042	3.76918e-05
		THAP domain containing 9	THAP9	A_33_P3271410	0.77489	1.19571e-05				growth arrest and DNA-damage-inducible, beta	GADD45B	A_24_P239606	0.966508	1.38854e-05				family with sequence similarity 157, member B	FAM157B	A_21_P0013914	0.811632	9.36331e-06				epiregulin	EREG	A_23_P41344	0.65898	0.00394041				anterior pharynx defective 1 homolog A (C. elegans)	APH1A	A_23_P12329	0.74041	0.000151991				stereocilin	STRC	A_33_P3357935	0.632389	0.00197388
			LOC148189	A_19_P00322711	0.776479	7.72286e-07				small nucleolar RNA host gene 12 (non-protein coding)	SNHG12	A_23_P74581	0.966713	2.65694e-07				chromosome 6 open reading frame 48	C6orf48	A_23_P122531	0.813937	3.05878e-06				basic leucine zipper transcription factor, ATF-like 3	BATF3	A_23_P160720	0.660129	4.96837e-05				FERM domain containing 6	FRMD6	A_24_P330303	0.742353	0.000438485				kinesin family member 20A	KIF20A	A_23_P256956	0.6329	0.000253403
		B-cell CLL/lymphoma 3	BCL3	A_23_P4662	0.778737	0.000333521						A_24_P884376	0.968413	1.85648e-05						A_24_P307065	0.814853	2.13371e-05				progestin and adipoQ receptor family member V	PAQR5	A_33_P3368750	0.661128	5.734e-05				family with sequence similarity 100, member B	FAM100B	A_24_P194714	0.743347	0.000234175				adenylate kinase 2	AK2	A_24_P179903	0.633359	0.000563867
			Q982T4	A_19_P00800555	0.778963	0.000531898				zinc finger and SCAN domain containing 21	ZSCAN21	A_23_P111865	0.972229	9.81488e-08				progesterone immunomodulatory binding factor 1	PIBF1	A_23_P411881	0.815671	7.33537e-06				cyclin B1 interacting protein 1, E3 ubiquitin protein ligase	CCNB1IP1	A_23_P76882	0.661653	1.53567e-05				spermine oxidase	SMOX	A_23_P102731	0.745921	0.000511426				ankyrin repeat domain 18B	ANKRD18B	A_21_P0013675	0.63355	0.00634954
		topoisomerase (DNA) III alpha	TOP3A	A_23_P15829	0.778999	0.000125002				small nucleolar RNA host gene 5 (non-protein coding)	SNHG5	A_19_P00321511	0.973538	1.39284e-06				proline-rich nuclear receptor coactivator 1	PNRC1	A_23_P145074	0.815717	1.00747e-05				uncharacterized LOC100506694	LOC100506694	A_19_P00317432	0.662495	0.000337122				doublecortin-like kinase 1	DCLK1	A_23_P369994	0.747229	4.90784e-06				G protein-coupled receptor kinase 6	GRK6	A_33_P3264875	0.633741	3.59216e-05
		zinc finger CCCH-type containing 12C	ZC3H12C	A_23_P388993	0.780366	5.34124e-06				zinc finger protein 227	ZNF227	A_23_P371011	0.974119	9.25547e-07				uncharacterized LOC440028	LOC440028	A_33_P3833256	0.81782	2.37277e-06				zinc finger protein 420	ZNF420	A_23_P380951	0.662587	0.000527963					XLOC_014105	A_19_P00321272	0.750268	0.000356643				forkhead box O3	FOXO3	A_33_P3240392	0.634292	1.15182e-05
		tumor protein, translationally-controlled 1 pseudogene	FKSG2	A_23_P255827	0.781562	7.24768e-05				oligonucleotide/oligosaccharide-binding fold containing 2A	OBFC2A	A_23_P329198	0.974595	6.06785e-08					XLOC_000555	A_21_P0001418	0.818463	1.64763e-06					SNHG11	A_19_P00318014	0.662595	1.21786e-05						A_33_P3399755	0.751278	5.83884e-05						A_33_P3369914	0.63431	0.000558295
		pim-3 oncogene	PIM3	A_23_P61398	0.782043	4.2555e-06				small nucleolar RNA host gene 5 (non-protein coding)	SNHG5	A_19_P00316419	0.97933	6.63306e-08				zinc finger protein 36, C3H type, homolog (mouse)	ZFP36	A_23_P39237	0.820002	8.64481e-05				uncharacterized LOC148189	LOC148189	A_33_P3705884	0.663117	1.70777e-05				small nucleolar RNA host gene 5 (non-protein coding)	SNHG5	A_19_P00317473	0.752363	1.02651e-05				ribosomal protein L5	RPL5	A_19_P00812587	0.636914	0.000502072
		oligonucleotide/oligosaccharide-binding fold containing 2A	OBFC2A	A_24_P229531	0.783232	0.00173599				small nucleolar RNA host gene 5 (non-protein coding)	SNHG5	A_19_P00321546	0.979975	2.0176e-07				biliverdin reductase B (flavin reductase (NADPH))	BLVRB	A_33_P3360728	0.820932	2.19707e-05				oxysterol binding protein-like 6	OSBPL6	A_23_P108823	0.663563	7.26127e-06				epiregulin	EREG	A_23_P41344	0.752573	0.00150169				zinc finger protein 284	ZNF284	A_33_P3221432	0.637456	0.00157593
				A_32_P88905	0.783269	6.88895e-07				uncharacterized LOC388796	LOC388796	A_19_P00322967	0.983605	2.44712e-07				dynein, light chain, LC8-type 1	DYNLL1	A_24_P124672	0.82264	0.000286431				poliovirus receptor	PVR	A_32_P72110	0.664072	0.000120207					LOC148189	A_19_P00322711	0.755675	1.06062e-06				GrpE-like 1, mitochondrial (E. coli)	GRPEL1	A_33_P3522525	0.637518	7.98118e-06
		cell death-inducing DFFA-like effector c pseudogene	CIDECP	A_24_P484797	0.784637	2.04526e-05				nuclear paraspeckle assembly transcript 1 (non-protein coding)	NEAT1	A_19_P00318409	0.987952	9.73876e-05				zinc finger protein 36, C3H type-like 1	ZFP36L1	A_33_P3417865	0.822794	0.000638367				colorectal neoplasia differentially expressed (non-protein coding)	CRNDE	A_32_P104063	0.664762	6.10817e-05				family with sequence similarity 122C	FAM122C	A_21_P0000080	0.758545	0.00131217				phorbol-12-myristate-13-acetate-induced protein 1	PMAIP1	A_33_P3619171	0.63768	0.00034927
		solute carrier family 6 (neurotransmitter transporter, glycine), member 9	SLC6A9	A_33_P3402615	0.78672	4.66622e-05				CCAAT/enhancer binding protein (C/EBP), gamma	CEBPG	A_33_P3253807	0.988214	6.94445e-07				spermine oxidase	SMOX	A_23_P102731	0.825059	0.000209151				AKNA domain containing 1	AKNAD1	A_33_P3241081	0.66634	0.000777334				glycyl-tRNA synthetase	GARS	A_24_P154948	0.758902	1.17262e-05				zinc finger protein 121	ZNF121	A_24_P935782	0.638059	9.1373e-05
		zinc finger protein 394	ZNF394	A_23_P157416	0.787303	7.42865e-06				X-box binding protein 1	XBP1	A_23_P120845	0.988539	1.08139e-08					LOC100507025	A_21_P0014172	0.826769	0.0004077				ankyrin repeat domain 57	ANKRD57	A_33_P3219785	0.667019	0.000120296				CCAAT/enhancer binding protein (C/EBP), gamma	CEBPG	A_33_P3253807	0.76106	1.31197e-05				KIAA1462	KIAA1462	A_23_P301521	0.638669	0.000990995
		hairy and enhancer of split 4 (Drosophila)	HES4	A_33_P3342628	0.788682	7.99548e-06				zinc finger protein 3 homolog (mouse)	ZFP3	A_33_P3309665	0.991797	3.16614e-06				zinc finger protein 473	ZNF473	A_24_P941376	0.82973	8.08878e-05						A_33_P3369914	0.668732	0.000353363				small nucleolar RNA host gene 5 (non-protein coding)	SNHG5	A_19_P00319095	0.761234	1.21726e-05				glutamic-oxaloacetic transaminase 1, soluble (aspartate aminotransferase 1)	GOT1	A_23_P63825	0.6395	6.43956e-06
		zinc finger protein 212	ZNF212	A_23_P415558	0.789801	7.48577e-06				zinc finger protein 331	ZNF331	A_33_P3381483	0.993267	2.90721e-07				GABA(A) receptor-associated protein like 1	GABARAPL1	A_24_P4816	0.835001	6.2862e-05					XLOC_l2_013931	A_21_P0013338	0.669979	0.000246592				small nucleolar RNA host gene 5 (non-protein coding)	SNHG5	A_19_P00317178	0.766534	0.000137653				growth arrest-specific 5 (non-protein coding)	GAS5	A_33_P3326285	0.639533	7.84659e-06
		ras homolog gene family, member B	RHOB	A_33_P3398862	0.794709	4.9829e-05				zinc finger protein 82 homolog (mouse)	ZFP82	A_33_P3415560	0.996016	7.27666e-08				chromosome 15 open reading frame 63	C15orf63	A_23_P117683	0.83538	0.000312192					SNHG11	A_19_P00320792	0.672788	0.00110021				v-maf musculoaponeurotic fibrosarcoma oncogene homolog B (avian)	MAFB	A_33_P3220837	0.767761	0.000129179				phosphoserine aminotransferase 1	PSAT1	A_21_P0010626	0.640378	0.00113499
		zinc finger family member 783	ZNF783	A_23_P365418	0.794857	1.56268e-06				Kruppel-like factor 10	KLF10	A_23_P168828	0.998533	5.26779e-07				zinc finger protein 227	ZNF227	A_23_P371011	0.835458	5.31217e-06				glutamic-oxaloacetic transaminase 1, soluble (aspartate aminotransferase 1)	GOT1	A_23_P63825	0.673861	3.60178e-06				inositol 1,4,5-trisphosphate receptor interacting protein	ITPRIP	A_23_P340333	0.769956	0.000220183				chromosome 11 open reading frame 63	C11orf63	A_23_P83751	0.64141	0.000532842
		zinc finger protein 367	ZNF367	A_32_P183218	0.796023	0.000112044				small nucleolar RNA host gene 5 (non-protein coding)	SNHG5	A_23_P361085	0.998753	3.17464e-07				FBJ murine osteosarcoma viral oncogene homolog	FOS	A_23_P106194	0.836394	0.000536035				GTF2I repeat domain containing 1	GTF2IRD1	A_23_P111621	0.674023	4.11798e-05				ankyrin repeat domain 57	ANKRD57	A_33_P3219785	0.770605	2.86995e-05				ribosomal protein L5	RPL5	A_23_P12140	0.643507	0.00263168
		chromosome 17 open reading frame 51	C17orf51	A_21_P0011533	0.79723	1.65598e-06				neural precursor cell expressed, developmentally down-regulated 9	NEDD9	A_33_P3368358	1.00442	3.96351e-06				serine peptidase inhibitor, Kazal type 5	SPINK5	A_33_P3391126	0.836882	2.13454e-06				myotubularin related protein 1	MTMR1	A_33_P3327097	0.675417	4.51003e-05						A_33_P3212839	0.773696	1.64129e-06				cyclin D-type binding-protein 1	CCNDBP1	A_33_P3392977	0.643913	1.00056e-05
		solute carrier family 7 (anionic amino acid transporter light chain, xc- system), member 11	SLC7A11	A_33_P3242623	0.80008	0.000121648				zinc finger protein 36, C3H type-like 1	ZFP36L1	A_23_P99540	1.00908	3.43018e-07				eukaryotic translation initiation factor 4H	EIF4H	A_32_P168886	0.838374	1.84399e-05				CCAAT/enhancer binding protein (C/EBP), gamma	CEBPG	A_33_P3253807	0.677657	4.38506e-05				growth arrest-specific 5 (non-protein coding)	GAS5	A_33_P3326285	0.774646	8.97793e-07				bromodomain adjacent to zinc finger domain, 2A	BAZ2A	A_23_P203841	0.644154	9.36008e-05
		SR-related CTD-associated factor 8	SCAF8	A_23_P111303	0.800911	1.7385e-05					XLOC_l2_014191	A_21_P0013475	1.01127	2.14383e-07				KIAA1147	KIAA1147	A_33_P3421626	0.839165	0.000234131				chemokine (C-X-C motif) ligand 3	CXCL3	A_24_P183150	0.678761	1.9565e-05					Q982T4	A_19_P00801585	0.777412	3.73681e-05				zinc finger protein 44	ZNF44	A_33_P3278774	0.644154	1.55612e-05
		chromosome 6 open reading frame 48	C6orf48	A_23_P122531	0.802151	3.60389e-06				small nucleolar RNA host gene 5 (non-protein coding)	SNHG5	A_19_P00320094	1.01428	1.08182e-07				cyclin T1	CCNT1	A_23_P98963	0.84131	4.79954e-07				protease, serine, 36	PRSS36	A_24_P412734	0.679341	0.000668264				small nucleolar RNA host gene 5 (non-protein coding)	SNHG5	A_19_P00320094	0.780271	2.40815e-06				zinc finger protein 165	ZNF165	A_23_P93269	0.644297	7.06173e-05
		cytochrome b-561 domain containing 1	CYB561D1	A_33_P3377110	0.805532	0.000115615				zinc finger protein 36, C3H type, homolog (mouse)	ZFP36	A_23_P39237	1.01436	9.69437e-06				tRNA methyltransferase 61 homolog A (S. cerevisiae)	TRMT61A	A_23_P151497	0.842426	1.79668e-05				chromosome 3 open reading frame 19	C3orf19	A_33_P3362521	0.680474	1.88804e-05				phosphoserine aminotransferase 1	PSAT1	A_21_P0010626	0.782089	0.000204602				ubiquitin-fold modifier 1	UFM1	A_33_P3399248	0.644815	4.0859e-05
		nuclear paraspeckle assembly transcript 1 (non-protein coding)	NEAT1	A_19_P00321332	0.805903	4.5573e-05				NUAK family, SNF1-like kinase, 2	NUAK2	A_33_P3338166	1.01491	3.85277e-07				uncharacterized LOC388796	LOC388796	A_19_P00322967	0.843033	1.50846e-06				transducin-like enhancer of split 1 (E(sp1) homolog, Drosophila)	TLE1	A_33_P3379775	0.681035	0.000644674				KIAA1462	KIAA1462	A_33_P3293446	0.789723	0.000189266				HUS1 checkpoint homolog (S. pombe)	HUS1	A_33_P3330841	0.645791	1.88524e-05
		zinc finger protein 295	ZNF295	A_24_P339869	0.806191	1.86432e-05				small nucleolar RNA host gene 5 (non-protein coding)	SNHG5	A_19_P00317473	1.01745	3.26834e-07				tumor protein p53 binding protein, 2	TP53BP2	A_23_P12526	0.845284	2.50965e-05				FOS-like antigen 1	FOSL1	A_23_P161624	0.681973	0.00178388				xanthine dehydrogenase	XDH	A_33_P3270863	0.789769	0.00020554				ubiquitin-conjugating enzyme E2L 3	UBE2L3	A_21_P0000566	0.646851	0.00190599
		zinc finger protein 26	ZNF26	A_24_P21831	0.806795	5.45372e-06						A_33_P3214343	1.02107	9.86168e-07				growth arrest and DNA-damage-inducible, beta	GADD45B	A_24_P239606	0.845363	5.5328e-05				uncharacterized LOC646778	LOC646778	A_21_P0014815	0.682146	0.000287239				GABA(A) receptor-associated protein like 1	GABARAPL1	A_24_P4816	0.789921	0.000107973				family with sequence similarity 157, member A	FAM157A	A_33_P3222501	0.647897	7.40062e-05
		denticleless homolog (Drosophila)	DTL	A_23_P10385	0.813831	6.17331e-07					Q982T4	A_19_P00801585	1.0225	1.91563e-06				chromodomain helicase DNA binding protein 2	CHD2	A_24_P264664	0.846013	8.90154e-07				forkhead box Q1	FOXQ1	A_32_P164246	0.682647	0.00131596				homeobox B9	HOXB9	A_23_P27013	0.791852	1.25951e-05						A_33_P3424339	0.648338	0.000925231
		zinc finger, MYM-type 5	ZMYM5	A_24_P321634	0.815818	0.000119564				small nucleolar RNA host gene 5 (non-protein coding)	SNHG5	A_19_P00316541	1.02544	2.59129e-07				nuclear receptor subfamily 2, group C, member 2	NR2C2	A_33_P3376463	0.846712	1.43548e-05				tumor necrosis factor receptor superfamily, member 10d, decoy with truncated death domain	TNFRSF10D	A_33_P3326588	0.682684	5.35957e-06				asparagine synthetase pseudogene	FLJ43315	A_21_P0010773	0.797342	8.60782e-06				cholinergic receptor, nicotinic, alpha 7	CHRNA7	A_32_P35969	0.648776	4.75078e-05
		zinc finger protein 181	ZNF181	A_23_P50735	0.815969	6.95984e-05				FBJ murine osteosarcoma viral oncogene homolog	FOS	A_23_P106194	1.02777	8.1367e-05				zinc finger protein 484	ZNF484	A_23_P341700	0.848156	1.1374e-06				family with sequence similarity 25, member A	FAM25A	A_32_P34138	0.683358	0.000425295				anterior pharynx defective 1 homolog A (C. elegans)	APH1A	A_23_P930	0.799544	0.00414626				zinc finger protein 485	ZNF485	A_23_P115861	0.648887	0.000243518
		Cas-Br-M (murine) ecotropic retroviral transforming sequence-like 1	CBLL1	A_23_P146004	0.816479	1.32277e-05				chromosome 8 open reading frame 4	C8orf4	A_23_P253350	1.03001	1.7241e-07					SNHG11	A_19_P00320792	0.848192	0.00014684				mex-3 homolog C (C. elegans)	MEX3C	A_23_P50137	0.683843	0.000983664				Fas apoptotic inhibitory molecule 3	FAIM3	A_23_P138125	0.802027	1.34355e-05				mitochondrial ribosomal protein S33	MRPS33	A_23_P157352	0.649981	0.000461548
		zinc finger protein 136	ZNF136	A_23_P67312	0.820813	5.18778e-06					Q5A5F0	A_19_P00805812	1.03206	2.77261e-05				small nucleolar RNA host gene 5 (non-protein coding)	SNHG5	A_19_P00316701	0.848207	1.07494e-06				GABA(A) receptor-associated protein like 1	GABARAPL1	A_24_P4816	0.684245	0.000402655				chemokine (C-X-C motif) ligand 1 (melanoma growth stimulating activity, alpha)	CXCL1	A_33_P3330264	0.804886	0.000625434				interleukin 6 signal transducer (gp130, oncostatin M receptor)	IL6ST	A_33_P3287338	0.650008	0.00202226
		hairy and enhancer of split 7 (Drosophila)	HES7	A_33_P3368695	0.822179	0.000162674				zinc finger protein 36, C3H type-like 1	ZFP36L1	A_33_P3417865	1.03285	8.08425e-05					XLOC_l2_014518	A_21_P0013516	0.848373	0.00084184				metallo-beta-lactamase domain containing 2	MBLAC2	A_33_P3415663	0.685366	0.000609405				guanine nucleotide binding protein (G protein), alpha z polypeptide	GNAZ	A_23_P416581	0.809071	0.000428491						A_19_P00319413	0.650888	6.14361e-06
		splicing factor proline/glutamine-rich	SFPQ	A_21_P0014601	0.822401	0.000250363				small nucleolar RNA host gene 5 (non-protein coding)	SNHG5	A_19_P00317743	1.03912	9.07999e-08						A_33_P3253214	0.849504	0.00400797				sorting nexin 9	SNX9	A_24_P179044	0.685396	0.00635936				family with sequence similarity 157, member B	FAM157B	A_21_P0013914	0.809632	9.61677e-06				WD repeat domain 74	WDR74	A_23_P36157	0.651126	0.000510948
		family with sequence similarity 27, member A	FAM27A	A_33_P3301219	0.823047	2.66137e-06				small nucleolar RNA host gene 1 (non-protein coding)	SNHG1	A_24_P785293	1.0478	2.77482e-07				activity-regulated cytoskeleton-associated protein	ARC	A_23_P365738	0.854523	1.05052e-05				uncharacterized LOC388152	LOC388152	A_33_P3228751	0.687719	0.00214343				X-box binding protein 1	XBP1	A_23_P120845	0.814476	1.2099e-07				interleukin 17 receptor B	IL17RB	A_24_P157370	0.652398	0.00119529
		zinc finger protein 562	ZNF562	A_33_P3398091	0.824444	5.53145e-07				jun D proto-oncogene	JUND	A_33_P3324909	1.0489	9.89002e-06				mitochondrial ribosomal protein L19	MRPL19	A_23_P102262	0.855311	4.35276e-06				GTP binding protein 2	GTPBP2	A_23_P379026	0.688656	5.2676e-06				RIO kinase 3 (yeast)	RIOK3	A_33_P3317850	0.814744	4.55143e-06				RecQ protein-like (DNA helicase Q1-like)	RECQL	A_23_P25215	0.653145	0.000288229
		zinc finger protein 697	ZNF697	A_32_P19716	0.824551	2.52428e-07				small nucleolar RNA host gene 5 (non-protein coding)	SNHG5	A_19_P00317178	1.04972	5.42064e-06				solute carrier family 38, member 2	SLC38A2	A_24_P295963	0.856003	0.000197961				sperm flagellar 1	SPEF1	A_33_P3314643	0.689795	0.00158248				apoptosis enhancing nuclease	AEN	A_23_P206077	0.817907	2.31813e-06				makorin ring finger protein 1 pseudogene	LOC441455	A_32_P122402	0.653457	4.09621e-05
			XLOC_005110	A_21_P0004479	0.824627	4.6712e-07				small nucleolar RNA host gene 5 (non-protein coding)	SNHG5	A_19_P00322666	1.0546	2.95801e-07				uncharacterized LOC90024	FLJ20021	A_21_P0000611	0.859457	3.11847e-06				tyrosyl-tRNA synthetase	YARS	A_23_P379550	0.690494	0.00552501				poly (ADP-ribose) polymerase family, member 6	PARP6	A_23_P163258	0.817952	0.000277224					NDUFAF2	A_19_P00810523	0.653693	2.52626e-05
				A_32_P840463	0.82959	7.36084e-07				chromosome 3 open reading frame 19	C3orf19	A_33_P3362521	1.05481	1.25243e-07				sterile alpha motif domain containing 4A	SAMD4A	A_33_P3264926	0.859487	3.2694e-05				xanthine dehydrogenase	XDH	A_33_P3270863	0.690653	0.000666762				small nucleolar RNA host gene 5 (non-protein coding)	SNHG5	A_19_P00317984	0.81826	8.48687e-06				interleukin 11	IL11	A_33_P3243887	0.653837	3.97938e-05
		IKAROS family zinc finger 5 (Pegasus)	IKZF5	A_33_P3421520	0.831413	9.10716e-05				neuregulin 1	NRG1	A_33_P3392192	1.05618	4.72464e-07				Fas apoptotic inhibitory molecule 3	FAIM3	A_23_P138125	0.859955	6.31022e-06				ubiquitin specific peptidase 31	USP31	A_23_P206612	0.691016	4.18093e-05				small nucleolar RNA host gene 5 (non-protein coding)	SNHG5	A_23_P361085	0.818797	3.2032e-06				guanine nucleotide binding protein (G protein), alpha z polypeptide	GNAZ	A_23_P416581	0.654192	0.00234632
		transforming growth factor beta regulator 1	TBRG1	A_24_P21752	0.831732	0.000303773				chromodomain helicase DNA binding protein 2	CHD2	A_24_P264664	1.05885	5.95802e-08				TSC22 domain family, member 1	TSC22D1	A_33_P3296205	0.867438	1.08419e-06				BCL2 binding component 3	BBC3	A_23_P382775	0.692236	0.00201657				MyoD family inhibitor	MDFI	A_33_P3246418	0.819734	1.84333e-05				dynein, light chain, LC8-type 1	DYNLL1	A_23_P65031	0.654618	0.000174743
		family with sequence similarity 53, member C	FAM53C	A_23_P167789	0.832638	1.38474e-06				serine peptidase inhibitor, Kazal type 5	SPINK5	A_33_P3340782	1.06542	1.85965e-07				transmembrane protein 41B	TMEM41B	A_21_P0000056	0.867604	9.80538e-06				FBJ murine osteosarcoma viral oncogene homolog B	FOSB	A_23_P429998	0.692311	0.000696784					P39188	A_19_P00320996	0.820151	6.13773e-05				solute carrier family 7 (anionic amino acid transporter light chain, xc- system), member 11	SLC7A11	A_33_P3242623	0.655748	0.000717198
		zinc finger protein 215	ZNF215	A_23_P53057	0.835645	2.1512e-07				zinc finger protein 82 homolog (mouse)	ZFP82	A_23_P416813	1.06673	1.05571e-06				Fas (TNF receptor superfamily, member 6)	FAS	A_33_P3332112	0.87033	2.68669e-05				uncharacterized LOC441172	FLJ46906	A_19_P00807628	0.692795	0.000148284				very low density lipoprotein receptor	VLDLR	A_23_P43476	0.820745	0.00131059				family with sequence similarity 122C	FAM122C	A_21_P0000080	0.656492	0.00378946
		zinc finger protein 383	ZNF383	A_23_P319013	0.836261	4.40361e-06				phorbol-12-myristate-13-acetate-induced protein 1	PMAIP1	A_33_P3619171	1.06758	1.77674e-06				oligonucleotide/oligosaccharide-binding fold containing 2A	OBFC2A	A_24_P229531	0.870932	0.000748859				poly (ADP-ribose) polymerase family, member 6	PARP6	A_23_P163258	0.696549	0.00108361				cysteinyl-tRNA synthetase	CARS	A_24_P95439	0.821652	8.2489e-05				chromosome 7 open reading frame 40	C7orf40	A_24_P506977	0.656799	0.000310486
		histone cluster 1, H2ae	HIST1H2AE	A_23_P59045	0.83974	0.0144742				Kruppel-like factor 2 (lung)	KLF2	A_23_P119196	1.07861	1.73192e-05				ras homolog gene family, member Q	RHOQ	A_21_P0011851	0.8712	0.000170797					XLOC_002730	A_21_P0003244	0.696682	0.00019692				adducin 2 (beta)	ADD2	A_33_P3241786	0.82285	0.000120915				harakiri, BCL2 interacting protein (contains only BH3 domain)	HRK	A_23_P25194	0.658718	1.34136e-05
		small nucleolar RNA host gene 5 (non-protein coding)	SNHG5	A_19_P00322702	0.842242	5.11615e-06				activity-regulated cytoskeleton-associated protein	ARC	A_23_P365738	1.07969	7.50439e-07				CCAAT/enhancer binding protein (C/EBP), gamma	CEBPG	A_33_P3253807	0.872878	2.90579e-06					XLOC_l2_003856	A_19_P00810988	0.699801	0.000983507				tetratricopeptide repeat domain 25	TTC25	A_23_P73150	0.828495	2.43466e-05				patatin-like phospholipase domain containing 2	PNPLA2	A_23_P10077	0.658796	7.969e-05
		neural precursor cell expressed, developmentally down-regulated 9	NEDD9	A_33_P3368358	0.84349	2.60498e-05				zinc finger protein 615	ZNF615	A_33_P3327961	1.07979	2.79228e-07				zinc finger protein 136	ZNF136	A_23_P67312	0.873308	2.58999e-06				uncharacterized LOC100505875	LOC100505875	A_19_P00800638	0.700456	0.017922				small nucleolar RNA host gene 5 (non-protein coding)	SNHG5	A_19_P00316541	0.831373	3.00114e-06				CCAAT/enhancer binding protein (C/EBP), gamma	CEBPG	A_33_P3253807	0.659635	5.74547e-05
		high mobility group box 2	HMGB2	A_23_P155765	0.843831	5.98345e-06				immediate early response 3	IER3	A_33_P3423551	1.08588	2.72092e-07				Dmx-like 1	DMXL1	A_23_P250571	0.87368	1.65869e-05				forkhead box O3	FOXO3	A_33_P3240392	0.700547	3.87365e-06						A_24_P221485	0.833184	2.08993e-05						A_33_P3212839	0.660659	9.5758e-06
		brain expressed X-linked 2	BEX2	A_33_P3245178	0.844201	0.000161152				chromosome 5 open reading frame 41	C5orf41	A_23_P404606	1.08829	3.22886e-06				Mov10, Moloney leukemia virus 10, homolog (mouse)	MOV10	A_23_P161125	0.87447	0.000180391				CCAAT/enhancer binding protein (C/EBP), beta	CEBPB	A_23_P411296	0.702359	2.34676e-05				ubiquitin specific peptidase 36	USP36	A_33_P3357247	0.833997	9.72896e-07				ER degradation enhancer, mannosidase alpha-like 3	EDEM3	A_24_P208045	0.660917	3.11815e-05
		FOS-like antigen 1	FOSL1	A_23_P161624	0.845427	0.000303295				small nucleolar RNA host gene 5 (non-protein coding)	SNHG5	A_19_P00322944	1.08871	3.54217e-08				Kruppel-like factor 5 (intestinal)	KLF5	A_23_P53891	0.875546	0.00037291				ribosomal protein S6 kinase, 90kDa, polypeptide 5	RPS6KA5	A_23_P37375	0.702603	1.21523e-05				kynureninase	KYNU	A_33_P3312658	0.836394	1.82515e-05				transmembrane protein 217	TMEM217	A_23_P334870	0.661834	0.000366494
		zinc finger protein 227	ZNF227	A_23_P371011	0.848639	4.46501e-06				tripartite motif family-like 2	TRIML2	A_23_P350005	1.09561	2.85073e-06				family with sequence similarity 86, member A pseudogene	FLJ10661	A_33_P3421200	0.880644	1.23414e-06				runt-related transcription factor 1	RUNX1	A_33_P3211804	0.704601	0.00565492				chemokine (C-X-C motif) ligand 3	CXCL3	A_24_P183150	0.837392	1.9475e-06				chromosome 5 open reading frame 63	C5orf63	A_21_P0012927	0.662523	0.000358179
		nuclear paraspeckle assembly transcript 1 (non-protein coding)	NEAT1	A_19_P00321333	0.849243	1.72832e-05				chromosome 7 open reading frame 40	C7orf40	A_24_P506977	1.1088	1.3855e-06				aryl hydrocarbon receptor	AHR	A_23_P215566	0.88073	2.95699e-06				family with sequence similarity 157, member A	FAM157A	A_33_P3222501	0.706528	3.09967e-05				small nucleolar RNA host gene 5 (non-protein coding)	SNHG5	A_19_P00322754	0.837511	7.61925e-06				ubiquitin-conjugating enzyme E2L 3	UBE2L3	A_32_P91250	0.6635	0.000352588
		zinc finger protein 3 homolog (mouse)	ZFP3	A_33_P3309665	0.849304	1.72246e-05				apoptosis enhancing nuclease	AEN	A_23_P206077	1.10941	6.14944e-08				basic transcription factor 3-like 4	BTF3L4	A_33_P3365616	0.883991	2.83042e-06				glycyl-tRNA synthetase	GARS	A_24_P154948	0.707919	2.44497e-05				growth factor receptor-bound protein 10	GRB10	A_23_P122863	0.839504	4.21933e-07				thymidine kinase 1, soluble	TK1	A_23_P107421	0.664713	4.03852e-05
		chromosome 6 open reading frame 48	C6orf48	A_33_P3353051	0.850523	3.75929e-05				regulator of G-protein signaling 2, 24kDa	RGS2	A_23_P114947	1.12513	1.11369e-06				uncharacterized LOC388796	LOC388796	A_19_P00318304	0.885222	3.82705e-07				WD repeat domain 45	WDR45	A_23_P251717	0.711329	1.01985e-05				bromodomain adjacent to zinc finger domain, 2A	BAZ2A	A_23_P203841	0.842475	5.76919e-06				colorectal neoplasia differentially expressed (non-protein coding)	CRNDE	A_32_P104063	0.66526	6.06289e-05
		aryl hydrocarbon receptor	AHR	A_33_P3316800	0.854454	0.000933698				zinc finger protein 16	ZNF16	A_23_P168864	1.13907	9.702e-07				family with sequence similarity 100, member B	FAM100B	A_24_P194714	0.886452	4.30927e-05				Hermansky-Pudlak syndrome 1	HPS1	A_24_P415327	0.711485	0.00149767				four and a half LIM domains 2	FHL2	A_23_P108751	0.849668	1.09773e-06						A_33_P3399755	0.66625	0.000185051
		BTG family, member 2	BTG2	A_23_P62901	0.85598	0.000218809				apoptosis enhancing nuclease	AEN	A_33_P3214501	1.14357	9.13402e-07						A_33_P3402600	0.886478	7.02462e-05				phosphodiesterase 4D, cAMP-specific	PDE4D	A_33_P3389653	0.713047	0.000731578				ZNFX1 antisense RNA 1 (non-protein coding)	ZNFX1-AS1	A_24_P161463	0.852692	2.08095e-06				chromosome 22 open reading frame 43	C22orf43	A_24_P91701	0.667375	0.000686384
		tRNA methyltransferase 61 homolog A (S. cerevisiae)	TRMT61A	A_23_P151497	0.856388	1.50987e-05				zinc finger protein 597	ZNF597	A_24_P378402	1.15109	8.68028e-07				serine peptidase inhibitor, Kazal type 5	SPINK5	A_23_P356494	0.88834	4.55663e-07				potassium channel, subfamily K, member 1	KCNK1	A_23_P126075	0.713665	8.39361e-05				small nucleolar RNA host gene 5 (non-protein coding)	SNHG5	A_19_P00321511	0.86581	5.249e-06				WD repeat and FYVE domain containing 3	WDFY3	A_32_P10396	0.667443	9.03947e-05
			XLOC_013282	A_19_P00804777	0.856991	2.40945e-05				chemokine (C-X-C motif) ligand 2	CXCL2	A_23_P315364	1.16093	9.67436e-09				mitochondrial ribosomal protein L24	MRPL24	A_23_P137848	0.88918	5.36565e-05				pleckstrin homology domain containing, family M (with RUN domain) member 2	PLEKHM2	A_23_P351342	0.714012	0.000142781				phorbol-12-myristate-13-acetate-induced protein 1	PMAIP1	A_33_P3619171	0.866845	1.76573e-05				Fas apoptotic inhibitory molecule 3	FAIM3	A_23_P138125	0.667825	8.71094e-05
			XLOC_l2_008163	A_21_P0011941	0.857388	0.000232951				zinc finger protein 420	ZNF420	A_23_P380951	1.17241	1.62559e-06				transducer of ERBB2, 2 pseudogene 1	TOB2P1	A_33_P3348011	0.889969	3.28892e-05				cell death-inducing DFFA-like effector c	CIDEC	A_33_P3240767	0.714042	4.24377e-05						A_33_P3363305	0.870675	4.99524e-05				Ras homolog enriched in brain like 1	RHEBL1	A_33_P3264895	0.668586	5.26048e-06
		cyclin B1 interacting protein 1, E3 ubiquitin protein ligase	CCNB1IP1	A_23_P76882	0.859749	8.1916e-07				chromosome 19 open reading frame 48	C19orf48	A_33_P3288754	1.17558	1.75585e-08				sterile alpha motif domain containing 4A	SAMD4A	A_24_P383523	0.893711	2.77357e-06				sprouty homolog 4 (Drosophila)	SPRY4	A_24_P269062	0.7147	8.19492e-06				activating transcription factor 4 (tax-responsive enhancer element B67)	ATF4	A_23_P120933	0.872651	3.30846e-06				ER lipid raft associated 2	ERLIN2	A_24_P372217	0.670289	5.33048e-05
		protein phosphatase, Mg2+/Mn2+ dependent, 1A	PPM1A	A_23_P409553	0.865207	5.12406e-07				FBJ murine osteosarcoma viral oncogene homolog B	FOSB	A_23_P429998	1.20988	2.72669e-06				nucleoporin like 1	NUPL1	A_33_P3320538	0.893769	4.36709e-07				family with sequence similarity 118, member A	FAM118A	A_33_P3252809	0.715468	0.00019203				seryl-tRNA synthetase	SARS	A_21_P0000629	0.873429	1.21476e-06				chromosome 3 open reading frame 19	C3orf19	A_33_P3362521	0.671055	2.1851e-05
		elongation factor RNA polymerase II	ELL	A_23_P16538	0.865691	1.23317e-06				small nucleolar RNA host gene 5 (non-protein coding)	SNHG5	A_19_P00319019	1.21406	2.37277e-07				CD3e molecule, epsilon associated protein	CD3EAP	A_23_P208310	0.896155	5.02762e-05				centriolin	CNTRL	A_24_P109554	0.716806	0.000716747				Ras homolog enriched in brain like 1	RHEBL1	A_33_P3264895	0.874549	2.33837e-07				centromere protein M	CENPM	A_24_P399888	0.671104	0.00178516
		ZNFX1 antisense RNA 1 (non-protein coding)	ZNFX1-AS1	A_24_P161463	0.868902	1.6774e-06				zinc finger protein 350	ZNF350	A_23_P78458	1.22232	3.94526e-08				clusterin associated protein 1	CLUAP1	A_23_P77714	0.898297	6.72188e-06				family with sequence similarity 24, member B	FAM24B	A_21_P0000707	0.721037	2.07505e-06				protease, serine, 36	PRSS36	A_24_P412734	0.876256	6.53306e-05				coiled-coil-helix-coiled-coil-helix domain containing 5	CHCHD5	A_24_P379727	0.671123	1.99138e-05
		chromosome 7 open reading frame 74	C7orf74	A_23_P406616	0.870954	1.41141e-05				cyclin L1	CCNL1	A_24_P337058	1.22513	2.14247e-08				uncharacterized LOC388796	LOC388796	A_19_P00317793	0.900993	1.15605e-07				DnaJ (Hsp40) homolog, subfamily B, member 9	DNAJB9	A_23_P258944	0.721222	7.63835e-05				chromosome 6 open reading frame 48	C6orf48	A_23_P122531	0.877094	1.30261e-06				PMS1 postmeiotic segregation increased 1 (S. cerevisiae)	PMS1	A_33_P3250463	0.671823	0.00453062
		zinc finger protein 844	ZNF844	A_33_P3247838	0.87099	6.10822e-06				seryl-tRNA synthetase	SARS	A_21_P0000629	1.22952	1.91629e-08				small nucleolar RNA host gene 5 (non-protein coding)	SNHG5	A_19_P00321546	0.9023	5.42086e-07				folliculin	FLCN	A_23_P414308	0.722051	1.44422e-05				small nucleolar RNA host gene 5 (non-protein coding)	SNHG5	A_19_P00322702	0.878745	3.18512e-06				KIAA1462	KIAA1462	A_33_P3293446	0.672444	0.000772306
		zinc finger, MYM-type 5	ZMYM5	A_23_P65208	0.871023	8.34074e-06				stanniocalcin 2	STC2	A_23_P416395	1.23289	1.86856e-08						A_33_P3348744	0.903647	4.76579e-05				Ras association (RalGDS/AF-6) and pleckstrin homology domains 1	RAPH1	A_24_P924862	0.72218	0.000901532				small nucleolar RNA host gene 5 (non-protein coding)	SNHG5	A_19_P00316659	0.887947	6.76534e-07				succinate dehydrogenase complex, subunit D, integral membrane protein pseudogene	LOC100289186	A_33_P3379763	0.672781	0.000360964
		NUAK family, SNF1-like kinase, 2	NUAK2	A_33_P3338166	0.872252	2.25518e-06				zinc finger protein 391	ZNF391	A_33_P3220090	1.25438	3.16274e-07				small nucleolar RNA host gene 1 (non-protein coding)	SNHG1	A_24_P785293	0.904937	1.55805e-06				Sad1 and UNC84 domain containing 2	SUN2	A_32_P194115	0.723576	9.83364e-05				small nucleolar RNA host gene 5 (non-protein coding)	SNHG5	A_19_P00316419	0.891856	2.08186e-07				glutathione S-transferase mu 1	GSTM1	A_23_P115407	0.672973	6.10157e-05
		interferon regulatory factor 1	IRF1	A_23_P41765	0.875327	5.57409e-07				Kruppel-like factor 4 (gut)	KLF4	A_23_P32233	1.26908	2.32928e-09				nuclear paraspeckle assembly transcript 1 (non-protein coding)	NEAT1	A_19_P00318409	0.905225	0.000221509				growth factor receptor-bound protein 10	GRB10	A_24_P235266	0.724315	7.72387e-05				BMP binding endothelial regulator	BMPER	A_33_P3219651	0.897136	7.64718e-05				phosphoserine aminotransferase 1	PSAT1	A_23_P259692	0.675087	0.00162928
		amphiregulin	AREG	A_33_P3419190	0.875644	0.00011008				zinc finger protein 84	ZNF84	A_23_P105276	1.27857	3.22318e-09				kinesin family member 24	KIF24	A_33_P3406939	0.907356	1.31504e-06				T-cell acute lymphocytic leukemia 2	TAL2	A_23_P409449	0.726661	0.000222322				cystathionase (cystathionine gamma-lyase)	CTH	A_23_P126103	0.899022	2.70578e-07				RNA guanylyltransferase and 5'-phosphatase	RNGTT	A_23_P325075	0.675939	0.000406038
		YY1 associated factor 2	YAF2	A_33_P3390456	0.87612	1.38306e-05				chemokine (C-X-C motif) ligand 1 (melanoma growth stimulating activity, alpha)	CXCL1	A_33_P3330264	1.27857	6.83846e-06				chromosome 8 open reading frame 4	C8orf4	A_23_P253350	0.908933	7.67435e-07				threonine synthase-like 2 (S. cerevisiae)	THNSL2	A_23_P259207	0.729364	0.000155462				small nucleolar RNA host gene 5 (non-protein coding)	SNHG5	A_19_P00316701	0.899611	5.38959e-07				perilipin 2	PLIN2	A_33_P3258617	0.676156	0.00221933
		zinc finger protein 394	ZNF394	A_33_P3290085	0.881236	2.15586e-07				zinc finger protein 226	ZNF226	A_23_P395555	1.30639	8.84313e-08				small nucleolar RNA host gene 5 (non-protein coding)	SNHG5	A_19_P00316541	0.909472	1.07273e-06				zinc finger protein 837	ZNF837	A_33_P3411427	0.73072	4.75137e-05				zinc finger protein 165	ZNF165	A_23_P93269	0.904316	1.88511e-06				tetratricopeptide repeat domain 25	TTC25	A_23_P73150	0.676482	0.000179311
		small nucleolar RNA host gene 5 (non-protein coding)	SNHG5	A_19_P00322754	0.883842	4.20532e-06				nuclear protein, transcriptional regulator, 1	NUPR1	A_24_P270728	1.31797	5.01306e-07						A_24_P603890	0.910084	0.00192876				chemokine (C-X-C motif) ligand 2	CXCL2	A_24_P257416	0.735593	9.46626e-07				chromosome 7 open reading frame 40	C7orf40	A_24_P506977	0.905232	1.32488e-05				ectonucleoside triphosphate diphosphohydrolase 7	ENTPD7	A_24_P112447	0.676885	9.26661e-05
		VGF nerve growth factor inducible	VGF	A_33_P3276703	0.885034	4.28821e-06				TSC22 domain family, member 3	TSC22D3	A_33_P3237634	1.32115	6.56621e-09				small nucleolar RNA host gene 5 (non-protein coding)	SNHG5	A_19_P00319095	0.910461	1.66425e-06				interleukin 11	IL11	A_33_P3243887	0.73645	1.14749e-05				small nucleolar RNA host gene 5 (non-protein coding)	SNHG5	A_19_P00321546	0.905664	5.18717e-07				WD repeat domain 83	WDR83	A_23_P39024	0.676948	0.000890849
		zinc finger protein 317	ZNF317	A_24_P258955	0.890764	1.37161e-06				nuclear receptor subfamily 4, group A, member 1	NR4A1	A_33_P3319791	1.32901	1.31622e-05				BTB and CNC homology 1, basic leucine zipper transcription factor 1	BACH1	A_23_P211047	0.912996	6.99098e-06				small nucleolar RNA host gene 5 (non-protein coding)	SNHG5	A_19_P00317473	0.737469	1.27256e-05				family with sequence similarity 24, member B	FAM24B	A_23_P52531	0.92707	7.75092e-06						A_33_P3315021	0.677012	0.000474741
		Kruppel-like factor 11	KLF11	A_23_P44505	0.891339	1.38766e-07				runt-related transcription factor 1	RUNX1	A_33_P3211804	1.33226	2.50778e-05				uncharacterized LOC550112	LOC550112	A_33_P3254756	0.915375	1.44365e-06					Q982T4	A_19_P00801585	0.739046	6.21287e-05				chromosome 6 open reading frame 48	C6orf48	A_33_P3353051	0.934329	1.41225e-05				chromosome 6 open reading frame 105	C6orf105	A_23_P156826	0.677163	0.000708491
		zinc finger protein 82 homolog (mouse)	ZFP82	A_23_P416813	0.893769	7.7731e-06				chemokine (C-X-C motif) ligand 2	CXCL2	A_24_P257416	1.39188	3.20633e-10				ras homolog gene family, member B	RHOB	A_33_P3398862	0.919109	1.09735e-05						A_33_P3232688	0.739154	1.85888e-05				uncharacterized LOC646329	LOC646329	A_19_P00317560	0.935621	1.17459e-05				epithelial mitogen homolog (mouse)	EPGN	A_24_P205994	0.681063	0.000374706
		zinc finger protein 82 homolog (mouse)	ZFP82	A_33_P3415560	0.894569	2.69341e-07				zinc finger and SCAN domain containing 12	ZSCAN12	A_21_P0000037	1.40265	1.51791e-09				ADP-ribosylation factor-like 5B	ARL5B	A_24_P943997	0.919202	7.84714e-06				transducer of ERBB2, 2 pseudogene 1	TOB2P1	A_33_P3348011	0.740855	0.000196348				perilipin 2	PLIN2	A_33_P3258617	0.94501	0.000131755				CoA synthase	COASY	A_23_P4144	0.681065	0.0014568
		spermine oxidase	SMOX	A_23_P102731	0.898775	9.33364e-05				ubiquitin specific peptidase 36	USP36	A_33_P3357247	1.43851	1.11006e-09					XLOC_011157	A_21_P0008807	0.919273	1.40179e-06				forkhead box O3	FOXO3	A_33_P3375665	0.742246	2.00803e-06						A_33_P3342430	0.961115	7.41398e-07				tripartite motif containing 32	TRIM32	A_23_P112311	0.681937	0.000239304
		chromosome 3 open reading frame 19	C3orf19	A_33_P3294881	0.899943	9.54123e-06				CDKN2A interacting protein	CDKN2AIP	A_23_P258002	1.45824	6.87966e-08				tumor necrosis factor receptor superfamily, member 10a	TNFRSF10A	A_23_P255653	0.921331	0.000122812				zinc finger protein 839 pseudogene	LOC389906	A_33_P3325229	0.742393	0.0021537				small nucleolar RNA host gene 5 (non-protein coding)	SNHG5	A_19_P00322944	0.968231	1.50395e-07				chromosome 6 open reading frame 48	C6orf48	A_33_P3353051	0.682105	0.00030999
		nucleoporin like 1	NUPL1	A_33_P3320538	0.902228	3.90363e-07				growth arrest and DNA-damage-inducible, alpha	GADD45A	A_23_P23221	1.4733	7.6792e-06				small nucleolar RNA host gene 5 (non-protein coding)	SNHG5	A_19_P00316419	0.923547	1.3625e-07				cat eye syndrome chromosome region, candidate 7 (non-protein coding)	CECR7	A_33_P3262625	0.745417	1.18808e-05				stanniocalcin 2	STC2	A_23_P416395	0.973314	3.42203e-07				hydroxysteroid (17-beta) dehydrogenase 4	HSD17B4	A_23_P92954	0.682292	0.000139284
		long intergenic non-protein coding RNA 265	LINC00265	A_32_P191503	0.903917	9.68914e-07				Kruppel-like factor 6	KLF6	A_23_P63798	1.48836	1.59568e-05				ubiquitin specific peptidase 8	USP8	A_23_P129058	0.923551	0.000114667				shroom family member 1	SHROOM1	A_33_P3245977	0.745621	0.000174945						A_24_P307065	0.976142	2.98834e-06				choroideremia-like (Rab escort protein 2)	CHML	A_24_P712350	0.682381	2.7934e-05
		nuclear paraspeckle assembly transcript 1 (non-protein coding)	NEAT1	A_21_P0011024	0.910536	8.38923e-05				nuclear factor, interleukin 3 regulated	NFIL3	A_23_P32253	1.52082	4.98992e-09				epiregulin	EREG	A_23_P41344	0.923608	0.0002711				growth arrest-specific 5 (non-protein coding)	GAS5	A_33_P3326285	0.746407	1.38205e-06				small nucleolar RNA host gene 5 (non-protein coding)	SNHG5	A_19_P00317743	0.98889	1.66314e-07				chromosome 5 open reading frame 28	C5orf28	A_23_P121875	0.684007	3.73565e-05
		B-cell CLL/lymphoma 6	BCL6	A_23_P57856	0.912618	4.77557e-06				chemokine (C-X-C motif) ligand 3	CXCL3	A_24_P183150	1.53327	1.11532e-09				H1 histone family, member 0	H1F0	A_23_P29257	0.923717	8.10061e-06				apoptosis enhancing nuclease	AEN	A_33_P3214501	0.749015	8.71158e-05				solute carrier family 6 (neurotransmitter transporter, glycine), member 9	SLC6A9	A_33_P3402615	1.00364	3.47157e-06				alanyl-tRNA synthetase	AARS	A_24_P172990	0.684607	0.00140095
			Q982T4	A_19_P00801585	0.915559	6.61104e-06				jun proto-oncogene	JUN	A_33_P3323298	1.55274	1.53427e-07				MID1 interacting protein 1 (gastrulation specific G12 homolog (zebrafish))	MID1IP1	A_33_P3217465	0.923886	7.12925e-07					XLOC_013282	A_19_P00804777	0.751381	9.04021e-05				small nucleolar RNA host gene 5 (non-protein coding)	SNHG5	A_19_P00319019	1.03015	1.6442e-06				protein kinase, cAMP-dependent, regulatory, type II, alpha	PRKAR2A	A_23_P22214	0.685045	0.000789798
		zinc finger protein 529	ZNF529	A_23_P433676	0.916095	1.48564e-05				BCL2 binding component 3	BBC3	A_23_P382775	1.55785	6.97367e-07				small nucleolar RNA host gene 12 (non-protein coding)	SNHG12	A_23_P74581	0.924757	4.51648e-07				small nucleolar RNA host gene 5 (non-protein coding)	SNHG5	A_19_P00319095	0.752879	1.3697e-05				small nucleolar RNA host gene 5 (non-protein coding)	SNHG5	A_19_P00322666	1.04948	3.1358e-07				cyclin L2	CCNL2	A_24_P376339	0.686429	0.000274316
		uncharacterized LOC148189	LOC148189	A_33_P3705884	0.917399	4.39965e-07				tribbles homolog 3 (Drosophila)	TRIB3	A_23_P210690	1.68387	1.78722e-09				small nucleolar RNA host gene 5 (non-protein coding)	SNHG5	A_19_P00317984	0.926048	2.13726e-06				chromosome 7 open reading frame 40	C7orf40	A_24_P506977	0.753028	8.68234e-05				solute carrier family 7 (anionic amino acid transporter light chain, xc- system), member 11	SLC7A11	A_33_P3242623	1.05759	6.93037e-06				zinc finger protein 805	ZNF805	A_33_P3247599	0.686787	9.71229e-05
		uncharacterized LOC388796	LOC388796	A_19_P00318304	0.917882	2.4787e-07				early growth response 1	EGR1	A_23_P214080	1.73339	7.67348e-07				EF-hand calcium binding domain 11	EFCAB11	A_23_P129014	0.926161	1.58261e-06				pyrroline-5-carboxylate reductase family, member 2	PYCR2	A_23_P149042	0.753313	0.000748386				RNA, U6atac small nuclear (U12-dependent splicing)	RNU6ATAC	A_21_P0000504	1.07859	3.01236e-05				zinc finger protein 397	ZNF397	A_23_P304511	0.687423	0.00100088
		small nucleolar RNA host gene 5 (non-protein coding)	SNHG5	A_19_P00316701	0.91869	4.2011e-07				arrestin domain containing 4	ARRDC4	A_23_P339818	1.79694	4.13557e-08				family with sequence similarity 118, member A	FAM118A	A_33_P3252809	0.92717	1.45277e-05				immediate early response 3	IER3	A_23_P42257	0.753376	8.82695e-06				growth arrest and DNA-damage-inducible, alpha	GADD45A	A_23_P23221	1.0856	0.000170263				uncharacterized LOC100506694	LOC100506694	A_19_P00317432	0.687464	0.000241945
		TSC22 domain family, member 1	TSC22D1	A_33_P3296205	0.91937	5.48162e-07				tumor necrosis factor, alpha-induced protein 3	TNFAIP3	A_24_P157926	1.98527	2.11217e-10				zinc finger protein 82 homolog (mouse)	ZFP82	A_33_P3415560	0.933571	1.60784e-07				family with sequence similarity 157, member B	FAM157B	A_21_P0013914	0.753568	2.06505e-05				growth differentiation factor 15	GDF15	A_23_P16523	1.1421	3.08244e-07				carbonic anhydrase XIII	CA13	A_23_P381714	0.687472	2.11984e-05
		family with sequence similarity 157, member B	FAM157B	A_21_P0013914	0.920081	2.3248e-06				sestrin 2	SESN2	A_23_P35082	1.98689	2.75398e-09				FERM domain containing 4B	FRMD4B	A_33_P3446495	0.933583	8.65634e-05				KIAA1462	KIAA1462	A_23_P301521	0.756516	0.000231696					XLOC_l2_014504	A_21_P0013514	1.14433	4.25237e-06				HLA complex group 18 (non-protein coding)	HCG18	A_19_P00320396	0.687685	0.00024483
		family with sequence similarity 118, member A	FAM118A	A_33_P3252809	0.921961	1.54241e-05				protein phosphatase 1, regulatory subunit 15A	PPP1R15A	A_23_P90172	2.05571	4.51233e-10				follistatin	FST	A_23_P110531	0.935572	4.63182e-06				yippee-like 5 (Drosophila)	YPEL5	A_33_P3281408	0.756982	4.534e-05				brain expressed X-linked 2	BEX2	A_33_P3245178	1.15549	6.55818e-06				THO complex 1	THOC1	A_23_P78372	0.689155	0.000132944
		amphiregulin	AREG	A_23_P259071	0.922138	0.000338139				inhibin, beta A	INHBA	A_23_P122924	2.15581	5.42513e-08				small nucleolar RNA host gene 5 (non-protein coding)	SNHG5	A_19_P00319019	0.936413	4.8322e-06				zinc finger protein 36, C3H type-like 1	ZFP36L1	A_33_P3417865	0.759582	0.0012228				asparagine synthetase (glutamine-hydrolyzing)	ASNS	A_23_P145694	1.24865	8.40178e-08				major histocompatibility complex, class I, F	HLA-F	A_33_P3379939	0.689631	0.000336635
		zinc finger protein 700	ZNF700	A_23_P27636	0.924598	1.175e-05				ChaC, cation transport regulator homolog 1 (E. coli)	CHAC1	A_33_P3376971	2.73044	1.68087e-11				coiled-coil domain containing 124	CCDC124	A_33_P3417141	0.936848	1.01981e-06				MyoD family inhibitor	MDFI	A_33_P3246418	0.760838	3.98496e-05					XLOC_l2_014191	A_21_P0013475	1.25131	1.53708e-08				GABA(A) receptor-associated protein	GABARAP	A_23_P27075	0.690026	3.72851e-05
				A_33_P3253214	0.925769	0.00217804				activating transcription factor 3	ATF3	A_23_P34915	2.99012	1.29576e-12				serine/arginine-rich splicing factor 7	SRSF7	A_24_P222911	0.937433	2.64056e-05				Kruppel-like factor 4 (gut)	KLF4	A_23_P32233	0.761558	1.26673e-06				arrestin domain containing 4	ARRDC4	A_23_P339818	1.26746	2.66431e-06					LOC148189	A_19_P00322711	0.692664	2.87852e-06
		jun B proto-oncogene	JUNB	A_24_P241815	0.926903	1.10605e-05				activating transcription factor 3	ATF3	A_24_P33895	3.1233	5.9601e-12				v-abl Abelson murine leukemia viral oncogene homolog 2	ABL2	A_32_P139894	0.939312	1.44216e-07				chromosome X open reading frame 61	CXorf61	A_23_P432352	0.762303	0.000104465				activating transcription factor 3	ATF3	A_23_P34915	1.28245	8.19593e-08				proteasome (prosome, macropain) subunit, beta type, 2	PSMB2	A_23_P170058	0.693044	0.000137378
		family with sequence similarity 24, member B	FAM24B	A_23_P52531	0.927584	7.7042e-06												tripartite motif containing 41	TRIM41	A_33_P3354434	0.941545	0.000388311				chemokine (C-X-C motif) ligand 2	CXCL2	A_23_P315364	0.762502	1.61001e-06				jun proto-oncogene	JUN	A_33_P3323298	1.31506	1.10843e-06				cirrhosis, autosomal recessive 1A (cirhin)	CIRH1A	A_24_P25346	0.693226	0.000347389
		ADP-ribosylation factor-like 5B	ARL5B	A_24_P943997	0.92924	6.96872e-06												zinc finger protein 36, C3H type-like 1	ZFP36L1	A_23_P99540	0.941609	7.78654e-07				SH3 and PX domains 2A	SH3PXD2A	A_23_P35456	0.76616	4.10582e-06				tumor necrosis factor, alpha-induced protein 3	TNFAIP3	A_24_P157926	1.35143	2.99807e-08				quiescin Q6 sulfhydryl oxidase 1	QSOX1	A_33_P3225268	0.695068	0.000778966
				A_33_P3342430	0.935343	1.01881e-06													XLOC_l2_015127	A_21_P0013717	0.94166	8.26612e-06				zinc finger protein 16	ZNF16	A_23_P168864	0.766911	6.99869e-05				family with sequence similarity 129, member A	FAM129A	A_24_P233786	1.35388	1.37897e-06				actin binding LIM protein family, member 2	ABLIM2	A_33_P3381666	0.695397	0.000183542
		cyclin T1	CCNT1	A_23_P98963	0.935537	1.33734e-07												CCAAT/enhancer binding protein (C/EBP), beta	CEBPB	A_23_P411296	0.941685	9.10172e-07						A_33_P3321906	0.768991	5.68302e-05				activating transcription factor 3	ATF3	A_24_P33895	1.35407	2.84786e-07				zinc finger protein 484	ZNF484	A_23_P341700	0.695687	1.04938e-05
		Fas apoptotic inhibitory molecule 3	FAIM3	A_23_P138125	0.935917	2.44985e-06												small nucleolar RNA host gene 5 (non-protein coding)	SNHG5	A_19_P00316659	0.942267	3.34345e-07				fibroblast growth factor 2 (basic)	FGF2	A_33_P3419696	0.771832	0.000822664				serine peptidase inhibitor, Kazal type 1	SPINK1	A_23_P214079	1.36462	2.84148e-08				cytochrome c oxidase subunit VIIc	COX7C	A_23_P110811	0.695769	3.90366e-05
		polo-like kinase 3	PLK3	A_23_P51646	0.938317	1.45105e-07												Sp2 transcription factor	SP2	A_23_P381449	0.943827	1.01149e-05				aldehyde dehydrogenase 1 family, member L2	ALDH1L2	A_33_P3282634	0.774027	0.000239371				inhibin, beta A	INHBA	A_23_P122924	1.41755	7.41925e-06				ribosomal protein L7a	RPL7A	A_23_P135084	0.6985	3.72067e-05
		chromosome 8 open reading frame 4	C8orf4	A_23_P253350	0.939046	5.22603e-07												Cbp/p300-interacting transactivator, with Glu/Asp-rich carboxy-terminal domain, 2	CITED2	A_23_P214969	0.944606	5.73503e-05				naked cuticle homolog 2 (Drosophila)	NKD2	A_23_P41804	0.775441	8.36359e-05				nuclear protein, transcriptional regulator, 1	NUPR1	A_24_P270728	1.55405	6.81415e-08				family with sequence similarity 179, member B	FAM179B	A_33_P3226202	0.698951	6.88727e-05
				A_32_P180265	0.939933	5.85864e-07												NADH dehydrogenase (ubiquinone) 1 beta subcomplex, 11, 17.3kDa	NDUFB11	A_23_P22765	0.94667	0.000168499					LOC148189	A_19_P00322711	0.777704	7.58132e-07				protein phosphatase 1, regulatory subunit 15A	PPP1R15A	A_23_P90172	1.5972	1.17309e-08				proline rich Gla (G-carboxyglutamic acid) 4 (transmembrane)	PRRG4	A_23_P127663	0.699264	0.00130061
		period homolog 1 (Drosophila)	PER1	A_23_P89589	0.941696	1.50241e-06												zinc finger protein 529	ZNF529	A_23_P433676	0.947788	1.03211e-05				apoptosis enhancing nuclease	AEN	A_23_P206077	0.77815	4.06498e-06				tribbles homolog 3 (Drosophila)	TRIB3	A_23_P210690	1.73923	1.17451e-09				sperm flagellar 1	SPEF1	A_33_P3314643	0.699386	0.00142286
		zinc finger protein 777	ZNF777	A_23_P309803	0.943837	5.00862e-06												small nucleolar RNA host gene 5 (non-protein coding)	SNHG5	A_19_P00321511	0.948625	1.87641e-06				EPB41L4A antisense RNA 1 (non-protein coding)	EPB41L4A-AS1	A_23_P58538	0.78206	5.27494e-06				sestrin 2	SESN2	A_23_P35082	1.84675	7.0385e-09				chemokine (C-X-C motif) ligand 1 (melanoma growth stimulating activity, alpha)	CXCL1	A_33_P3330264	0.700975	0.00187882
		uncharacterized LOC388796	LOC388796	A_19_P00322220	0.949959	1.18578e-07												oligonucleotide/oligosaccharide-binding fold containing 2A	OBFC2A	A_23_P329198	0.951128	8.19706e-08						A_32_P40375	0.78208	1.693e-06				ChaC, cation transport regulator homolog 1 (E. coli)	CHAC1	A_33_P3376971	2.3065	1.58557e-10				X-box binding protein 1	XBP1	A_23_P120845	0.702185	7.17006e-07
		small nucleolar RNA host gene 5 (non-protein coding)	SNHG5	A_19_P00316419	0.950932	9.52983e-08												calcium homeostasis endoplasmic reticulum protein	CHERP	A_23_P16139	0.951972	2.98199e-07						A_23_P3552	0.784908	1.64193e-05												forkhead box O3	FOXO3	A_33_P3375665	0.702318	3.75325e-06
			XLOC_011157	A_21_P0008807	0.95137	9.4119e-07												X-box binding protein 1	XBP1	A_23_P120845	0.952353	1.73341e-08				small nucleolar RNA host gene 5 (non-protein coding)	SNHG5	A_19_P00317178	0.785946	0.000108505												chromosome 20 open reading frame 141	C20orf141	A_33_P3251462	0.702473	0.00248655
		zinc finger protein 420	ZNF420	A_23_P380951	0.952427	1.61853e-05												SCY1-like 2 (S. cerevisiae)	SCYL2	A_23_P204550	0.956738	3.89023e-06				small nucleolar RNA host gene 5 (non-protein coding)	SNHG5	A_19_P00320094	0.787312	2.17418e-06												mitochondrial fission factor	MFF	A_23_P92994	0.702705	5.21901e-06
		uncharacterized LOC550112	LOC550112	A_33_P3254756	0.954414	8.88907e-07												ZNFX1 antisense RNA 1 (non-protein coding)	ZNFX1-AS1	A_24_P161463	0.960991	5.17737e-07				endosulfine alpha	ENSA	A_32_P107746	0.794004	0.000979725												phosphoribosyl transferase domain containing 1	PRTFDC1	A_33_P3380523	0.702706	0.000426292
		cell death-inducing DFFA-like effector c	CIDEC	A_33_P3240767	0.954742	1.8314e-06												v-ets erythroblastosis virus E26 oncogene homolog 2 (avian)	ETS2	A_24_P314179	0.962205	8.59951e-06				RIO kinase 3 (yeast)	RIOK3	A_33_P3317850	0.79472	5.99502e-06												PMS2 postmeiotic segregation increased 2 (S. cerevisiae)	PMS2	A_23_P93792	0.702732	2.17261e-05
				A_23_P3552	0.95652	1.85317e-06												zinc finger protein 420	ZNF420	A_23_P380951	0.962802	1.44268e-05						A_33_P3342430	0.796338	6.30745e-06												tetratricopeptide repeat, ankyrin repeat and coiled-coil containing 2	TANC2	A_24_P942068	0.702887	5.86345e-06
			XLOC_014105	A_19_P00321272	0.958593	3.44537e-05												chromosome 17 open reading frame 48	C17orf48	A_23_P55127	0.964939	1.07297e-06				spermine oxidase	SMOX	A_23_P102731	0.798323	0.000282036														A_33_P3322150	0.703395	0.000239744
		TGFB-induced factor homeobox 1	TGIF1	A_23_P153197	0.963488	7.15694e-08												germ cell associated 1	GSG1	A_33_P3405285	0.965945	0.000109489				uncharacterized LOC145694	LOC145694	A_33_P3441639	0.803105	0.00019554												interleukin 6 signal transducer (gp130, oncostatin M receptor)	IL6ST	A_33_P3233834	0.70402	8.29688e-05
		zinc finger protein 16	ZNF16	A_23_P168864	0.966446	6.2562e-06												zinc finger protein 3 homolog (mouse)	ZFP3	A_33_P3309665	0.966735	4.218e-06				family with sequence similarity 24, member B	FAM24B	A_23_P52531	0.804521	3.47055e-05												tyrosine 3-monooxygenase/tryptophan 5-monooxygenase activation protein, epsilon polypeptide	YWHAE	A_33_P3407636	0.704856	0.000727836
		WAS protein homolog associated with actin, golgi membranes and microtubules	WHAMM	A_24_P307827	0.967967	3.36006e-07												small nucleolar RNA host gene 5 (non-protein coding)	SNHG5	A_23_P361085	0.968918	4.55887e-07				family with sequence similarity 90, member A1	FAM90A1	A_23_P151059	0.808071	7.75045e-06													XLOC_003399	A_21_P0002923	0.705094	0.000168699
		GTP binding protein 2	GTPBP2	A_23_P379026	0.968546	9.69137e-08												small nucleolar RNA host gene 5 (non-protein coding)	SNHG5	A_19_P00322666	0.971907	7.79507e-07				phosphodiesterase 9A	PDE9A	A_33_P3419594	0.808221	0.000125321												Down syndrome critical region gene 3	DSCR3	A_23_P154874	0.705511	3.13537e-05
		small nucleolar RNA host gene 5 (non-protein coding)	SNHG5	A_19_P00319095	0.968704	8.10515e-07												v-abl Abelson murine leukemia viral oncogene homolog 2	ABL2	A_33_P3219601	0.97263	1.56376e-05				very low density lipoprotein receptor	VLDLR	A_23_P43476	0.808725	0.0014697												growth arrest and DNA-damage-inducible, alpha	GADD45A	A_23_P23221	0.707627	0.00513645
		small nucleolar RNA host gene 5 (non-protein coding)	SNHG5	A_19_P00321546	0.969736	2.29057e-07												zinc finger protein 643	ZNF643	A_23_P160200	0.973438	3.52966e-08				uncharacterized LOC283454	LOC283454	A_33_P3687198	0.811831	0.000102526												chemokine (C-X-C motif) ligand 2	CXCL2	A_24_P257416	0.708248	1.46894e-06
		MID1 interacting protein 1 (gastrulation specific G12 homolog (zebrafish))	MID1IP1	A_33_P3217465	0.969758	4.01736e-07												zinc finger protein 669	ZNF669	A_33_P3339687	0.982743	2.79047e-05					Q8WNA4	A_19_P00801506	0.81711	3.72609e-05												dipeptidyl-peptidase 9	DPP9	A_33_P3292028	0.708612	0.003494
			MTRNR2L9	A_21_P0000109	0.971101	0.0071694												DEAH (Asp-Glu-Ala-His) box polypeptide 8	DHX8	A_23_P124224	0.985183	1.33919e-06				zinc finger protein 350	ZNF350	A_23_P78458	0.819217	4.53118e-06												RIO kinase 3 (yeast)	RIOK3	A_33_P3317850	0.710878	1.98958e-05
		serine peptidase inhibitor, Kazal type 5	SPINK5	A_33_P3391126	0.971168	3.75459e-07												eukaryotic translation initiation factor 4H	EIF4H	A_21_P0013292	0.985266	4.00471e-05				guanine nucleotide binding protein (G protein), alpha z polypeptide	GNAZ	A_23_P416581	0.821488	0.000375142												zinc finger protein 607	ZNF607	A_23_P27810	0.710891	0.000893826
		follistatin	FST	A_23_P110531	0.973797	2.95752e-06												immediate early response 3	IER3	A_23_P42257	0.987697	4.00812e-07				family with sequence similarity 83, member A	FAM83A	A_23_P216052	0.822218	0.000138786												dyslexia susceptibility 1 candidate 1	DYX1C1	A_33_P3344169	0.711752	0.000495364
		small nucleolar RNA host gene 5 (non-protein coding)	SNHG5	A_19_P00316659	0.975142	2.21388e-07												apoptosis enhancing nuclease	AEN	A_23_P206077	0.991971	2.41224e-07				epithelial mitogen homolog (mouse)	EPGN	A_24_P205994	0.823233	6.36838e-05												vault RNA 2-1	VTRNA2-1	A_21_P0000584	0.712681	0.0033006
		solute carrier family 38, member 2	SLC38A2	A_24_P295963	0.975192	5.67015e-05														A_24_P187023	0.995882	1.19118e-06						A_24_P307065	0.82726	1.82073e-05												zinc finger RNA binding protein	ZFR	A_24_P311771	0.712704	0.000144056
		TGFB-induced factor homeobox 1	TGIF1	A_21_P0000192	0.976535	3.79865e-08												small nucleolar RNA host gene 5 (non-protein coding)	SNHG5	A_19_P00320094	0.997121	1.33267e-07				chromosome 6 open reading frame 105	C6orf105	A_23_P156826	0.827433	0.000118277												armadillo repeat containing, X-linked 3	ARMCX3	A_24_P23411	0.714907	4.63689e-05
		zinc finger protein 331	ZNF331	A_33_P3381483	0.977066	3.54019e-07												zinc finger protein 82 homolog (mouse)	ZFP82	A_23_P416813	0.999119	2.24339e-06				chemokine (C-X-C motif) ligand 1 (melanoma growth stimulating activity, alpha)	CXCL1	A_33_P3330264	0.829294	0.000485203												transmembrane protein 126B	TMEM126B	A_23_P2129	0.716308	5.82172e-05
		kynureninase	KYNU	A_33_P3312658	0.977813	3.3258e-06													LOC100506906	A_21_P0014479	1.0013	3.52023e-06				cysteine-rich protein 2	CRIP2	A_23_P112798	0.829391	4.05494e-05												progestin and adipoQ receptor family member V	PAQR5	A_33_P3368750	0.718323	2.46521e-05
		zinc finger protein 615	ZNF615	A_33_P3327961	0.978331	8.99286e-07												zinc finger protein 181	ZNF181	A_23_P50735	1.00284	8.17774e-06				VGF nerve growth factor inducible	VGF	A_33_P3276703	0.833588	8.29485e-06												NADH dehydrogenase, subunit 6 (complex I)	ND6	A_23_P317056	0.719204	0.00010861
		sprouty homolog 4 (Drosophila)	SPRY4	A_24_P269062	0.979237	2.17521e-07												ST8 alpha-N-acetyl-neuraminide alpha-2,8-sialyltransferase 5	ST8SIA5	A_23_P379789	1.00295	6.11093e-06				chromosome 6 open reading frame 48	C6orf48	A_23_P122531	0.833814	2.32756e-06												male germ cell-associated kinase	MAK	A_24_P363278	0.71975	7.40899e-06
		zinc finger and SCAN domain containing 21	ZSCAN21	A_23_P111865	0.97953	8.95352e-08												cytohesin 2	CYTH2	A_23_P119377	1.011	2.10176e-05				TSC22 domain family, member 3	TSC22D3	A_33_P3237634	0.837767	1.69988e-06												cell death-inducing DFFA-like effector c pseudogene	CIDECP	A_24_P484797	0.722693	4.75898e-05
				A_24_P307065	0.980513	2.84134e-06												small nucleolar RNA host gene 5 (non-protein coding)	SNHG5	A_19_P00317473	1.01266	3.45812e-07					XLOC_014105	A_19_P00321272	0.840899	0.000125477												uncharacterized LOC100506136	LOC100506136	A_19_P00319030	0.723645	3.95006e-05
		X-box binding protein 1	XBP1	A_23_P120845	0.980691	1.19644e-08												small nucleolar RNA host gene 5 (non-protein coding)	SNHG5	A_19_P00317178	1.01974	7.45395e-06				YY1 associated factor 2	YAF2	A_33_P3390456	0.844915	2.02938e-05												small nucleolar RNA, H/ACA box 65	SNORA65	A_21_P0000251	0.725253	1.16176e-05
		uncharacterized LOC388796	LOC388796	A_24_P860703	0.983207	3.80492e-08												zinc finger protein 420	ZNF420	A_33_P3395396	1.02106	2.97433e-06				small nucleolar RNA host gene 5 (non-protein coding)	SNHG5	A_19_P00317984	0.846202	5.87591e-06												solute carrier family 44, member 1	SLC44A1	A_23_P216630	0.725263	1.7247e-05
		dual specificity phosphatase 5	DUSP5	A_23_P150018	0.984405	1.24287e-07														A_23_P3552	1.02469	8.34956e-07						A_33_P3212839	0.846717	5.73554e-07												haloacid dehalogenase-like hydrolase domain containing 2	HDHD2	A_23_P153098	0.725976	0.000862016
				A_33_P3214343	0.987325	1.45607e-06												ankyrin repeat and SOCS box containing 3	ASB3	A_23_P56833	1.02497	1.11979e-06				KIAA1462	KIAA1462	A_33_P3293446	0.847836	9.67563e-05												ribophorin I	RPN1	A_24_P63262	0.726943	1.75475e-05
		uncharacterized LOC388796	LOC388796	A_19_P00317793	0.987664	3.71716e-08												chromosome 18 open reading frame 21	C18orf21	A_21_P0000150	1.02512	2.1902e-07				microtubule associated serine/threonine kinase family member 4	MAST4	A_23_P110571	0.848147	0.000232311												forkhead box L1	FOXL1	A_33_P3355503	0.72734	0.00250458
				A_24_P884376	0.988409	1.49562e-05												small nucleolar RNA host gene 5 (non-protein coding)	SNHG5	A_19_P00317743	1.02617	1.05903e-07						A_33_P3363305	0.851525	6.23482e-05												methyltransferase like 21B	METTL21B	A_23_P320878	0.727542	9.78559e-06
		GATA binding protein 6	GATA6	A_23_P304450	0.989966	2.18806e-07												B-cell translocation gene 1, anti-proliferative	BTG1	A_23_P87560	1.02824	2.71643e-05				proline rich Gla (G-carboxyglutamic acid) 4 (transmembrane)	PRRG4	A_23_P127663	0.853122	0.00024189														A_33_P3321923	0.72877	0.000571637
		activity-regulated cytoskeleton-associated protein	ARC	A_23_P365738	0.990719	2.03173e-06												zinc finger protein 562	ZNF562	A_33_P3398091	1.02885	3.73706e-08				cyclin L2	CCNL2	A_24_P376339	0.853724	3.35685e-05												metastasis associated 1 family, member 3	MTA3	A_23_P154522	0.730492	7.61291e-05
		apoptosis enhancing nuclease	AEN	A_23_P206077	0.994055	2.35198e-07												zinc finger protein 165	ZNF165	A_23_P93269	1.03045	4.09907e-07				small nucleolar RNA host gene 5 (non-protein coding)	SNHG5	A_19_P00322754	0.854448	6.11768e-06												chromosome 6 open reading frame 48	C6orf48	A_23_P122531	0.735636	9.35978e-06
		zinc finger protein 484	ZNF484	A_23_P341700	0.994234	1.72106e-07												Rho family GTPase 3	RND3	A_23_P142849	1.03474	7.30578e-06				phorbol-12-myristate-13-acetate-induced protein 1	PMAIP1	A_33_P3619171	0.859575	1.92942e-05												proteasome (prosome, macropain) subunit, beta type, 2	PSMB2	A_24_P284893	0.738458	0.000243352
		CCAAT/enhancer binding protein (C/EBP), gamma	CEBPG	A_33_P3253807	1.00346	5.7975e-07												IKAROS family zinc finger 5 (Pegasus)	IKZF5	A_33_P3421520	1.03508	9.58625e-06				activating transcription factor 4 (tax-responsive enhancer element B67)	ATF4	A_23_P120933	0.860194	3.88733e-06												Dmx-like 1	DMXL1	A_23_P250571	0.738694	9.10366e-05
		Kruppel-like factor 5 (intestinal)	KLF5	A_23_P53891	1.00498	0.000104886												zinc finger protein 331	ZNF331	A_33_P3381483	1.03836	1.70095e-07				X-box binding protein 1	XBP1	A_23_P120845	0.860563	6.14936e-08												family with sequence similarity 157, member B	FAM157B	A_21_P0013914	0.739876	2.50025e-05
		solute carrier family 16, member 6 (monocarboxylic acid transporter 7)	SLC16A6	A_23_P152791	1.00901	3.62397e-07												stanniocalcin 2	STC2	A_23_P416395	1.03969	1.54407e-07				zinc finger protein 469	ZNF469	A_32_P116556	0.863088	1.61519e-07												cytohesin 2	CYTH2	A_23_P119377	0.741342	0.00041544
		activating transcription factor 4 (tax-responsive enhancer element B67)	ATF4	A_23_P120933	1.01063	6.08778e-07												chromosome 21 open reading frame 63	C21orf63	A_33_P3258747	1.04284	1.5799e-05				small nucleolar RNA host gene 5 (non-protein coding)	SNHG5	A_19_P00316541	0.873221	1.71625e-06												growth factor receptor-bound protein 10	GRB10	A_23_P122863	0.742367	1.7765e-06
		small nucleolar RNA host gene 1 (non-protein coding)	SNHG1	A_24_P785293	1.01488	4.06579e-07												PHD finger protein 11	PHF11	A_23_P65174	1.04495	3.5697e-06				immediate early response 3	IER3	A_33_P3423551	0.877499	3.25944e-06												heterogeneous nuclear ribonucleoprotein A1	HNRNPA1	A_24_P517901	0.743	0.00648972
		zinc finger protein 350	ZNF350	A_23_P78458	1.01793	3.68599e-07												Ras homolog enriched in brain like 1	RHEBL1	A_33_P3264895	1.04772	2.5281e-08				family with sequence similarity 122C	FAM122C	A_21_P0000080	0.880132	0.000382429												serine peptidase inhibitor, Kazal type 5	SPINK5	A_33_P3340782	0.744009	1.14846e-05
		Cbp/p300-interacting transactivator, with Glu/Asp-rich carboxy-terminal domain, 2	CITED2	A_23_P214969	1.01889	2.65883e-05												neural precursor cell expressed, developmentally down-regulated 9	NEDD9	A_33_P3368358	1.05105	2.37647e-06					P39188	A_19_P00320996	0.88024	3.00402e-05												uncharacterized LOC283454	LOC283454	A_33_P3687198	0.745117	0.000228985
		B-cell translocation gene 1, anti-proliferative	BTG1	A_23_P87560	1.02261	2.87471e-05												family with sequence similarity 157, member A	FAM157A	A_33_P3222501	1.05159	3.63984e-07				heme oxygenase (decycling) 1	HMOX1	A_23_P120883	0.881101	2.99693e-05												chromosome 9 open reading frame 102	C9orf102	A_23_P424269	0.745145	1.13967e-05
		family with sequence similarity 157, member A	FAM157A	A_33_P3222501	1.03005	4.65756e-07														A_33_P3214343	1.0516	6.98487e-07				cell death-inducing DFFA-like effector c pseudogene	CIDECP	A_24_P484797	0.882025	5.80785e-06												chromosome 5 open reading frame 41	C5orf41	A_23_P404606	0.745969	0.00016124
		WEE1 homolog (S. pombe)	WEE1	A_33_P3290567	1.03171	0.000189155												BTB (POZ) domain containing 3	BTBD3	A_24_P134356	1.05186	9.52297e-05					XLOC_007398	A_21_P0006017	0.882264	7.31602e-05												small nucleolar RNA host gene 5 (non-protein coding)	SNHG5	A_19_P00317473	0.746272	1.12047e-05
		uncharacterized LOC388796	LOC388796	A_19_P00322967	1.03907	1.25795e-07												zinc finger and SCAN domain containing 21	ZSCAN21	A_23_P111865	1.05407	3.61029e-08				cystathionase (cystathionine gamma-lyase)	CTH	A_23_P126103	0.883676	3.32651e-07													Q982T4	A_19_P00801585	0.746484	5.62453e-05
		chromosome 3 open reading frame 19	C3orf19	A_33_P3362521	1.03964	1.49424e-07												phorbol-12-myristate-13-acetate-induced protein 1	PMAIP1	A_33_P3619171	1.05566	2.02042e-06				small nucleolar RNA host gene 5 (non-protein coding)	SNHG5	A_19_P00316701	0.897246	5.56012e-07												uncharacterized LOC646329	LOC646329	A_19_P00317560	0.746772	0.000116045
			XLOC_000555	A_21_P0001418	1.04073	9.43322e-08												Kruppel-like factor 2 (lung)	KLF2	A_23_P119196	1.05886	2.10329e-05				small nucleolar RNA host gene 5 (non-protein coding)	SNHG5	A_19_P00321511	0.897894	3.49884e-06												family with sequence similarity 149, member B1	FAM149B1	A_33_P3422679	0.746812	6.10807e-05
		unc-51-like kinase 1 (C. elegans)	ULK1	A_24_P73370	1.04174	1.66123e-06												immediate early response 3	IER3	A_33_P3423551	1.0593	3.66142e-07					Q5A5F0	A_19_P00805812	0.899641	0.000108935												isocitrate dehydrogenase 2 (NADP+), mitochondrial	IDH2	A_23_P129209	0.746863	0.000526769
		uncharacterized LOC100505875	LOC100505875	A_19_P00800638	1.04879	0.00129433												asparagine synthetase pseudogene	FLJ43315	A_21_P0010773	1.07061	2.92988e-07				four and a half LIM domains 2	FHL2	A_23_P108751	0.899865	5.60047e-07												solute carrier organic anion transporter family, member 5A1	SLCO5A1	A_23_P135669	0.750275	4.66955e-05
		zinc finger protein 777	ZNF777	A_33_P3215134	1.04989	1.85716e-07												ubiquitin specific peptidase 3	USP3	A_33_P3231110	1.07382	1.36487e-05				ubiquitin specific peptidase 36	USP36	A_33_P3357247	0.900692	3.92648e-07														A_24_P307306	0.750575	0.00072592
		small nucleolar RNA host gene 5 (non-protein coding)	SNHG5	A_19_P00321511	1.05095	5.69645e-07												SET domain, bifurcated 1	SETDB1	A_33_P3305399	1.07655	2.3129e-06				growth factor receptor-bound protein 10	GRB10	A_23_P122863	0.902708	1.76333e-07												inositol 1,4,5-trisphosphate receptor interacting protein	ITPRIP	A_23_P340333	0.750904	0.000276337
			Q5A5F0	A_19_P00805812	1.05173	2.27933e-05												chromosome 7 open reading frame 40	C7orf40	A_24_P506977	1.07675	1.94083e-06				zinc finger protein 165	ZNF165	A_23_P93269	0.90378	1.89794e-06												chemokine (C-X-C motif) ligand 2	CXCL2	A_23_P315364	0.753924	1.8332e-06
		regulator of G-protein signaling 2, 24kDa	RGS2	A_23_P114947	1.05231	2.40237e-06												THUMP domain containing 3	THUMPD3	A_23_P212213	1.079	1.31191e-05				small nucleolar RNA host gene 5 (non-protein coding)	SNHG5	A_19_P00316419	0.904726	1.75022e-07												family with sequence similarity 207, member A	FAM207A	A_23_P61202	0.755413	2.25488e-06
		Rho family GTPase 3	RND3	A_23_P142849	1.05288	6.03753e-06												family with sequence similarity 24, member B	FAM24B	A_23_P52531	1.0806	1.38474e-06				small nucleolar RNA host gene 5 (non-protein coding)	SNHG5	A_23_P361085	0.908709	9.70259e-07												insulin receptor substrate 2	IRS2	A_24_P154037	0.756366	2.46224e-05
[truncated: 311 more rows]
